# Supplementary material for: UvKmt2-Mediated H3K4 Trimethylation Is Required for Pathogenicity and Stress Response in Ustilaginoidea virens
Source: MDPI journal article supplement (doi:10.3390/jof8060553), 2022-05-24
Supplement: s1 [file s1]

# Supplementary Materials

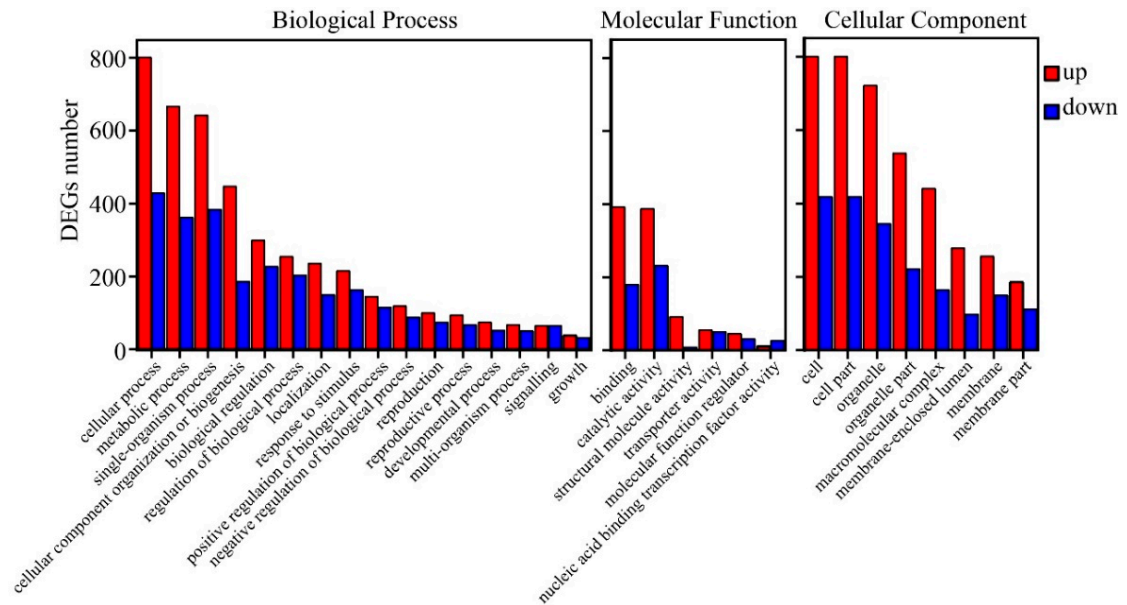

**Figure S1.** GO enrichment analysis of differentially expressed genes between the WT and  $\Delta Uvkmt2$  strains. The most enriched GO terms were categorized as biological processes, molecular function, and cellular component.

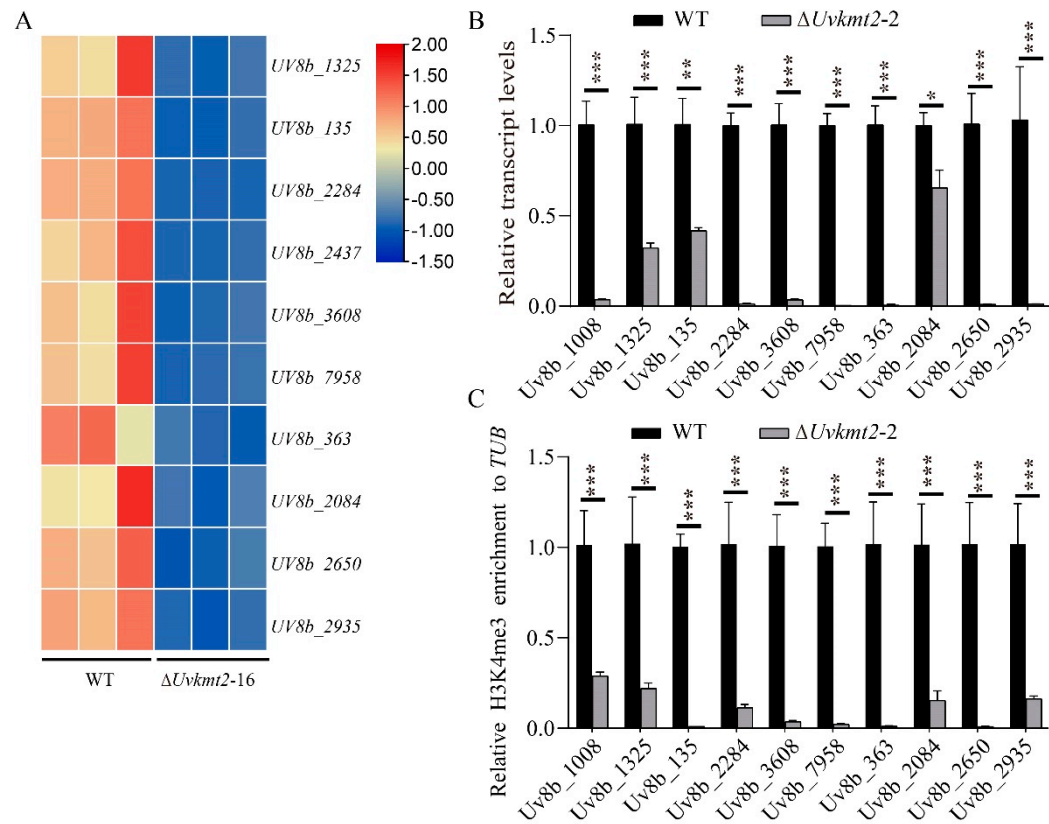

**Figure S2.** UvKmt2-mediated H3K4me3 modification is required for the activation of sporulation and pathogenic genes in *U. vires*. (A) Heatmaps of

the expression levels of 10 down-regulated genes putatively involved in sporulation and virulence in the  $\Delta Uvkm2$  mutant. (B) The relative transcriptional levels of representative sporulation and pathogenic-related genes were determined by qRT-PCR analysis. (C) ChIP-qPCR assay verified the enrichment of H3K4me3 modification on the chromatin of sporulation and pathogenic-related genes. DNA-immunoprecipitated with anti-H3K4me3 antibody was used as template to detect relative enrichment in the WT and  $\Delta Uvkm2$  strains. Data represents mean  $\pm$  SD of three independent biological replicates. \*, \*\* or \*\*\* represent P value < 0.01, < 0.005 or < 0.001 compared with that of WT.

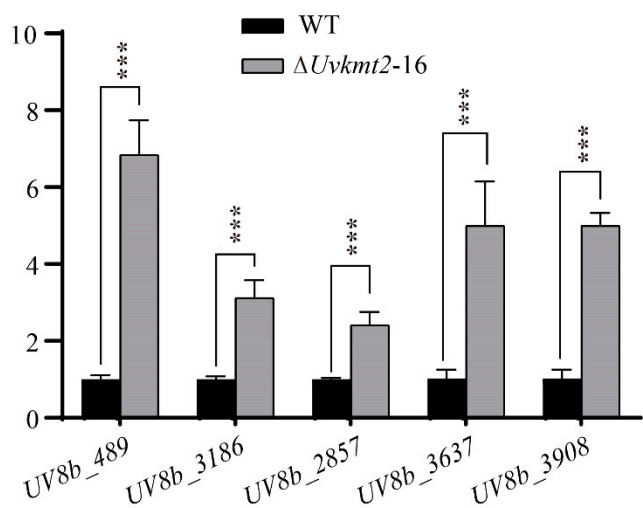

**Figure S3.** qRT-PCR analysis of the expression levels of the genes related to cell wall, chitin synthase, and hyperosmotic stress between WT and  $\Delta Uvkm2$ . Data represents mean  $\pm$  SD of three independent biological replicates. \*\*\* represent P value < 0.001 compared with that of WT.

**Table S1.** Primers used in this study.

**Table S2.** Genes marked by H3K4me3 modification.

**Table S3.** Up-regulated genes in the  $\Delta Uvkm2$  mutant.

**Table S4.** Down-regulated genes in the  $\Delta Uvkm2$  mutant.
