# Supplementary material for: UvKmt2-Mediated H3K4 Trimethylation Is Required for Pathogenicity and Stress Response in Ustilaginoidea virens
Source: J Fungi (Basel). 2022 May 24;8(6):553. doi: 10.3390/jof8060553 (PMC9225167; doi:10.3390/jof8060553)
Supplement: Supplementary file 1 [file jof-08-00553-s001.zip › jof-1714481-supplementary.xlsx]

## Sheet: Table S1
Table S1 Primers used in this study
Primer	Sequence (5’-3’)	Application
UvKMT2-3F	GGTACCCGGGGGATCCTATTACGGTTGTCGTCCAA	Amplifying UvKMT2 3' flank sequence for gene deletion
UvKMT2-3R	TCTAGAACTAGTGGATCCTTCGGGTTATGAGAAGTATGT
UvKMT2-5F	GCAGGCATGCAAGCTTGGAGGGCGATGGTAAAGA	Amplifying UvKMT2 5' flank sequence for gene deletion
UvKMT2-5R	TACCCAATTCAAGCTTATCAGGCGGTTGGTGGTT
UvKMT2-TF	ACCTAGATGAACCCCAACGATAAT	Transformants screening
p821-5R	ACCTCCACTAGCTCCAGCCAAG
UvKMT2-CF	AGCTCGGTACCCGGGGGATCCTATTACGGTTGTCGTCCAA	ΔUvKMT2 complementation assay
UvKMT2-CR	TTCAATATCCTCGACTCTAGATCTTTACCATCGCCCTCC
UvKMT2RT-F	GTCTCTCCATCATCGCCTCA	Analysis the expression level of UvKMT2 gene of U. virens
UvKMT2RT-R	CCCAAGAGCCAAACTCATCG
UvACTIN-F	CCATGTACCCTGGTCTCTCC	Analysis the expression level of ACTIN gene of U. virens
UvACTIN-R	CTCTCGTCGTACTCCTGCTT
UvKMT2-probeF	CGAGATGATGTTGCGGTGTT	Amplification of probe for Southern blot assay
UvKMT2-probeR	CGCCTTGTTTGAGGGATT
Neo-p823-F	CTAGTCTAGAGATTAACGCTTACAATTTCCATTCG	Amplification of neomycin resistance gene to construct the vector pFGL823
Neo-p823-R	GTGGAATGATTCAGAAGAACTCGTCAAGAAGGCGA
qUV8b_1008-F	GTCAACGTGAACCAGGCTTT	Analysis the expression level of sporulation and disease-related genes under WT and ΔUvKMT2 in RNA-seq data in U. virens
qUV8b_1008-R	TAGCTTCTTGCGAACCATGC
qUV8b_1325-F	CTTCAAGACCACAGGCATCG
qUV8b_1325-R	CGCATCACGTCTTCACAAGT
qUV8b_135-F	TGAACAAGGTGCTAGTCGGT
qUV8b_135-R	TCGTGACACAATTCGCACTC
qUV8b_1888-F	GGCTGAAATACGTCCACTCG
qUV8b_1888-R	TAAGCATGATCTCGGGTGCT
qUV8b_2284-F	CTCCTCTTGCTCAACATGGC
qUV8b_2284-R	TCGATGTCTCCAAGCCCTTT
qUV8b_2437-F	TCCAATCCATCCGTCTCACC
qUV8b_2437-R	TCCAATCCATCCGTCTCACC
qUV8b_3608-F	GATCCTCCTCCATTCTGCGA
qUV8b_3608-R	GCTGTGGCTCATTCTGGAAG
qUV8b_7958-F	GGTACATCCTGGTCCTCTCG
qUV8b_7958-R	AGGCCGTAGATGGTGATGAG
qUv8b_363-F	CCTTGGTGTTGTTTGTCGGT
qUv8b_363-R	CTTTGCGAGGGCTTCTTCTC
qUv8b_2084-F	CTGAACTTTGGCATCGCGTA
qUv8b_2084-R	CCATGCACCAGACGAAGAAG
qUv8b_2650-F	CCTATCTAGCGCGCAAACTC
qUv8b_2650-R	GTTTCCGAGCATGGAAGGAC
qUv8b_2935-F	CTTTGTCTTCGTCCCACGTC
qUv8b_2935-R	CTTTGTCTTCGTCCCACGTC
qUvActin-ChipF	GTCTTCGAGACCTTCAACGC	Analysis the expression level of sporulation and disease-related genes under WT and ΔUvKMT2 in ChIP-qPCR data in U. virens
qUvActin-ChipR	GTGGTACGACCAGAGGCATA
qUV8b_1008-ChipF	ATCACCTGATCCCTTTGCCA
qUV8b_1008-ChipR	CACGGGATAAAGGCTGGTTG
qUV8b_1325-ChipF	ACTTGTGAAGACGTGATGCG
qUV8b_1325-ChipR	ATCACCTAGCCGTCGACATT
qUV8b_135-ChipF	GATGCAACCAGCTCGTCATT
qUV8b_135-ChipR	AGCCCTTGTCGTGTTCTGTA
qUV8b_1888-ChipF	CGCTCAGCGACATCTTCATT
qUV8b_1888-ChipR	GCCGAGTGGACGTATTTCAG
qUV8b_2284-ChipF	TCAGCGTTCGGTTTCGTATG
qUV8b_2284-ChipR	AATTCGTCGTCGAGAGCAAG
qUV8b_2437-ChipF	AGAGCAAGAAGGGATGCGAT
qUV8b_2437-ChipR	TAGGAGAGCAGGCTGTGATG
qUV8b_3608-ChipF	CCCTCTGGACGTTGACGATA
qUV8b_3608-ChipR	AACTCGTACGCTTTGCCTTC
qUV8b_7958-ChipF	GACTGGAGAGAGCAAGACGA
qUV8b_7958-ChipR	CACTTGGATCGCCGAGAAAC
qUv8b_363-Chip-F	GGCTGGGAGACGTTCAAATC
qUv8b_363-Chip-R	AAGCAGCTCTTCCACTTCCT
qUv8b_2084-Chip-F	CATCATGGTCGGGCTCTTTG
qUv8b_2084-Chip-R	AGGGAAGCTTACCCAGTGTC
qUv8b_2650-Chip-F	CCTATCTAGCGCGCAAACTC
qUv8b_2650-Chip-R	GTTTCCGAGCATGGAAGGAC
qUv8b_2935-Chip-F	TAAATGCCGAAGCGTCACAG
qUv8b_2935-Chip-R	GTCCGGACAACTTTGTAGGC
qUV8b_489-F	CGCCATTCATCTCAGGCTTC	Analysis the expression level of cell wall, chitin synthase, and hyperosmotic genes under WT and ΔUvKMT2 in ChIP-qPCR data in U. virens
qUV8b_489-R	AAAGCCGTAGTCGTAGTCGT
qUV8b_3186-F	AGCAGTCCCTTCGCCATATT
qUV8b_3186-R	CTTCACACTTGCTGCTCACG
qUV8b_2857-F	CTACATCTCGGACGTGTGGA
qUV8b_2857-R	GTGAGGAGGTAGGTGATGGG
qUV8b_3637-F	TCCAAATGCAATTCCACGCA
qUV8b_3637-R	CGCAGAATCGAACGGATCTT
qUV8b_3908-F	CCGCAGACATTTCTCCCAAG
qUV8b_3908-R	GTGTCGTCCAGAACAGAAGC

## Sheet: Table S2
Table S2 Genes marked by H3K4me3
Gene ID	Chr	Start	End	Strand	Peak Score	Focus Ratio/Region Size	Distance to TSS	Protein product	Protein Name
UV8b_2149	JHTR01000008.1	487958	488833	+	976.1	875	100	KDB17057.1	putative nuclear serine protease HtrA2/Nma111
UV8b_5710	JHTR01000032.1	44272	46605	+	4714.9	2333	754	KDB13331.1	putative transcription regulator BDF1
UV8b_921	JHTR01000003.1	236269	237530	+	2427.1	1261	685	KDB18073.1	alanyl-tRNA synthetase
UV8b_4113	JHTR01000019.1	185399	186655	+	2017.3	1256	432	KDB14967.1	aconitate hydratase
UV8b_609	JHTR01000002.1	306837	308648	+	3124.1	1811	619	KDB18367.1	DUF250 domain membrane protein
UV8b_6621	JHTR01000042.1	236074	237339	+	1796.6	1265	332	KDB12600.1	WD domain containing protein
UV8b_7839	JHTR01000074.1	48643	50400	+	3389.1	1757	454	KDB11310.1	golgi complex component
UV8b_6557	JHTR01000042.1	19591	22608	+	5721.6	3017	1226	KDB12536.1	Sorting nexin mvp-1
UV8b_2102	JHTR01000008.1	355221	356100	+	1033.3	879	279	KDB17010.1	nicotinamide mononucleotide adenylyl transferase
UV8b_6710	JHTR01000044.1	209670	210569	+	1315.2	899	60	KDB12486.1	putative transcription regulatory protein
UV8b_6924	JHTR01000048.1	150797	151834	+	1297.1	1037	278	KDB12220.1	TRAPP complex component Bet3
UV8b_6451	JHTR01000040.1	308712	309463	+	1028.3	751	-855	KDB12795.1	Autophagy-related protein 18
UV8b_4834	JHTR01000024.1	151895	153902	+	4113.1	2007	1331	KDB14239.1	oligopeptide transporter 2
UV8b_7741	JHTR01000071.1	111005	111882	+	1182.7	877	217	KDB11428.1	putative aminomethyl transferase
UV8b_1008	JHTR01000003.1	560886	562014	+	1716.1	1128	508	KDB18160.1	trehalose phosphate synthase
UV8b_5565	JHTR01000031.1	32046	33180	+	1495.1	1134	175	KDB13467.1	exosome complex subunit RRP46
UV8b_622	JHTR01000002.1	369081	371260	+	3217	2179	1155	KDB18380.1	hypothetical protein UV8b_622
UV8b_7276	JHTR01000057.1	94436	94936	+	552.6	500	257	KDB11853.1	stress response rci
UV8b_1800	JHTR01000007.1	195307	196191	+	1268.6	884	165	KDB17203.1	vacuolar ATP synthase subunit E
UV8b_6709	JHTR01000044.1	206816	207836	+	1423	1020	464	KDB12485.1	hypothetical protein UV8b_6709
UV8b_2604	JHTR01000010.1	307365	308373	+	1535.5	1008	672	KDB16569.1	hypothetical protein UV8b_2604
UV8b_6706	JHTR01000044.1	200059	201064	+	1305.6	1005	598	KDB12482.1	phosphoserine aminotransferase
UV8b_5898	JHTR01000033.1	244943	245971	+	1564.3	1028	786	KDB13308.1	aspartate aminotransferase
UV8b_7744	JHTR01000071.1	122274	123919	+	3053	1645	442	KDB11431.1	hypothetical protein UV8b_7744
UV8b_6695	JHTR01000044.1	159483	160927	+	2046.5	1444	344	KDB12471.1	FAM96B-like protein
UV8b_501	JHTR01000001.1	2184709	2185459	+	1217.8	750	241	KDB19110.1	pyridoxamine phosphate oxidase family protein
UV8b_3846	JHTR01000016.1	462483	464366	+	3195.1	1883	-81	KDB15420.1	ketoisovalerate reductase
UV8b_1553	JHTR01000005.1	604232	605643	+	2697.1	1411	668	KDB17669.1	glycosyltransferase family 31 protein
UV8b_7412	JHTR01000061.1	24796	25673	+	1308.4	877	221	KDB11703.1	putative ribosomal protein
UV8b_7380	JHTR01000059.1	126286	127286	+	1673.5	1000	-4519	KDB11792.1	putative COP9 signalosome subunit 2 (CsnB)
UV8b_861	JHTR01000003.1	66564	67442	+	1564	878	385	KDB18013.1	D-arabinitol 2-dehydrogenase
UV8b_3708	JHTR01000016.1	25731	26485	+	1163.7	754	527	KDB15282.1	putative oxysterol binding protein (Osh3)
UV8b_8189	JHTR01000088.1	37350	39713	+	3891.8	2363	2228	KDB10956.1	WD repeat containing protein pop1
UV8b_6818	JHTR01000046.1	101273	103203	+	3634.1	1930	503	KDB12331.1	hypothetical protein UV8b_6818
UV8b_6519	JHTR01000041.1	207880	208855	+	1559.1	975	409	KDB12673.1	eukaryotic translation initiation factor 3 subunit 2
UV8b_3343	JHTR01000014.1	171015	172017	+	1287.7	1002	372	KDB15703.1	hypothetical protein UV8b_3343
UV8b_7194	JHTR01000054.1	120391	121776	+	1751.9	1385	398	KDB11965.1	Rho2 GTPase
UV8b_4896	JHTR01000024.1	400885	401385	+	728.5	500	-165	KDB14301.1	putative TOM1 protein
UV8b_7752	JHTR01000071.1	138460	139343	+	1237.8	883	123	KDB11439.1	40S ribosomal protein S12
UV8b_5631	JHTR01000031.1	226123	228378	+	4402.6	2255	1142	KDB13533.1	HEX2 protein-like protein
UV8b_7369	JHTR01000059.1	75287	75914	+	865.2	627	424	KDB11781.1	rho3 protein
UV8b_8011	JHTR01000079.1	107479	108922	+	2337.9	1443	469	KDB11149.1	hypothetical protein UV8b_8011
UV8b_5187	JHTR01000028.1	90398	91786	+	2490.4	1388	316	KDB13853.1	C6 transcription factor
UV8b_8301	JHTR01000103.1	36577	38083	+	2694.5	1506	1021	KDB10857.1	WD40 repeat-like-containing domain
UV8b_6061	JHTR01000036.1	115984	117698	+	2638.7	1714	745	KDB13061.1	cyclin-dependent protein kinase complex component
UV8b_1312	JHTR01000004.1	566566	567320	+	1068.8	754	879	KDB17945.1	Nuclear pore complex protein An-Nup82
UV8b_8307	JHTR01000104.1	1927	2802	+	1046.5	875	427	KDB10836.1	dolichyl-diphosphooligosaccharide-protein glycotransferase
UV8b_2470	JHTR01000009.1	759882	760634	+	1047.9	752	384	KDB16879.1	serine family amino acid catabolism-related protein
UV8b_886	JHTR01000003.1	138318	139356	+	1540.5	1038	295	KDB18038.1	hypothetical protein UV8b_886
UV8b_7443	JHTR01000061.1	128710	129712	+	1384.7	1002	66	KDB11734.1	hypothetical protein UV8b_7443
UV8b_6912	JHTR01000048.1	122945	123954	+	1395.3	1009	36	KDB12208.1	DNA-dependent RNA polymerase II beta subunit
UV8b_6363	JHTR01000040.1	19738	20238	+	749.9	500	-3170	KDB12707.1	DNA-repair protein rad2
UV8b_2278	JHTR01000009.1	124454	125329	+	1136.8	875	664	KDB16687.1	glucose-6-phosphate 1-dehydrogenase (G6PD)
UV8b_5674	JHTR01000031.1	365007	366327	+	1750.4	1320	1593	KDB13576.1	HMG box protein
UV8b_3218	JHTR01000013.1	289129	289880	+	1229.3	751	-1822	KDB15906.1	hypothetical protein UV8b_3218
UV8b_8308	JHTR01000104.1	5164	6042	+	1068.1	878	1734	KDB10837.1	Pre-mRNA-splicing factor ISY1
UV8b_4995	JHTR01000026.1	16846	17471	+	729.9	625	268	KDB14006.1	putative peroxisomal targeting signal receptor
UV8b_2392	JHTR01000009.1	515188	518311	+	4943.7	3123	265	KDB16801.1	elongation factor 1-gamma
UV8b_4913	JHTR01000024.1	440576	441470	+	1216.2	894	744	KDB14318.1	putative Zn-dependent hydrolase/oxidoreductase family protein
UV8b_6675	JHTR01000044.1	91507	92262	+	1025.5	755	633	KDB12451.1	putative transcription factor
UV8b_1704	JHTR01000006.1	558214	559483	+	2165.2	1269	195	KDB17447.1	telomerase activating protein est1
UV8b_3687	JHTR01000015.1	556413	558418	+	3623	2005	848	KDB15656.1	LAS seventeen-binding protein
UV8b_3861	JHTR01000016.1	511559	516244	+	7073.1	4685	752	KDB15435.1	GMP synthase
UV8b_4427	JHTR01000020.1	561381	562649	+	2330.2	1268	868	KDB14904.1	C2H2 finger domain protein FlbC
UV8b_784	JHTR01000002.1	862496	863378	+	1650.9	882	389	KDB18542.1	hypothetical protein UV8b_784
UV8b_6626	JHTR01000042.1	259338	259838	+	651	500	123	KDB12605.1	putative serine-tRNA ligase, cytosolic
UV8b_7033	JHTR01000050.1	160655	161669	+	1431.7	1014	514	KDB12130.1	2,3-dihydroxybenzoic acid decarboxylase dhbD
UV8b_2710	JHTR01000011.1	95463	96469	+	1327.2	1006	2280	KDB16254.1	putative alpha/beta hydrolase
UV8b_4883	JHTR01000024.1	332915	334423	+	2175.5	1508	1046	KDB14288.1	Fungal specific transcription factor domain-containing protein
UV8b_5582	JHTR01000031.1	84537	86552	+	3560.4	2015	1364	KDB13484.1	6-phosphogluconate dehydrogenase
UV8b_402	JHTR01000001.1	1675250	1676001	+	939.8	751	240	KDB19011.1	DEAD helicases superfamily protein (Aquarius)
UV8b_6278	JHTR01000038.1	181717	184273	+	4536.5	2556	609	KDB12917.1	putative endosomal SPRY domain protein
UV8b_6118	JHTR01000036.1	309916	310791	+	1413.6	875	1849	KDB13118.1	40s ribosomal protein S11
UV8b_3480	JHTR01000014.1	631877	632627	+	1062.2	750	214	KDB15840.1	37S ribosomal protein S25
UV8b_8134	JHTR01000083.1	32778	33905	+	1686.9	1127	-1720	KDB11006.1	hypothetical protein UV8b_8134
UV8b_6377	JHTR01000040.1	64708	66735	+	2837.4	2027	152	KDB12721.1	hypothetical protein UV8b_6377
UV8b_8112	JHTR01000082.1	76735	79293	+	4981.1	2558	1100	KDB11048.1	ammonium permease MepC
UV8b_4884	JHTR01000024.1	337974	338864	+	1130.2	890	454	KDB14289.1	thiazole biosynthetic enzyme variant 1
UV8b_5967	JHTR01000034.1	250630	253788	+	5214.8	3158	1399	KDB13207.1	hypothetical protein UV8b_5967
UV8b_2600	JHTR01000010.1	291201	292375	+	1804.8	1174	414	KDB16565.1	putative mRNA splicing factor (Prp17)
UV8b_2371	JHTR01000009.1	429966	431171	+	1978.3	1205	1671	KDB16780.1	hypothetical protein UV8b_2371
UV8b_3251	JHTR01000013.1	415007	416053	+	1818.7	1046	283	KDB15939.1	small nuclear ribonucleoprotein
UV8b_6465	JHTR01000041.1	35793	36800	+	1486.6	1007	474	KDB12619.1	Lysophospholipase like protein
UV8b_2460	JHTR01000009.1	722468	723597	+	1554.8	1129	319	KDB16869.1	hypothetical protein UV8b_2460
UV8b_750	JHTR01000002.1	752885	753900	+	1738.4	1015	320	KDB18508.1	putative Myb-like DNA-binding protein
UV8b_829	JHTR01000002.1	1003562	1005078	+	2272.7	1516	811	KDB18587.1	homogentisate 1,2-dioxygenase
UV8b_2400	JHTR01000009.1	534615	536644	+	4000.6	2029	-330	KDB16809.1	putative Snf1 kinase complex beta-subunit Gal83
UV8b_4488	JHTR01000021.1	185120	187653	+	4897.3	2533	-226	KDB14632.1	hypothetical protein UV8b_4488
UV8b_1988	JHTR01000007.1	830216	831541	+	1741.3	1325	700	KDB17391.1	T-complex protein 1 subunit alpha
UV8b_6744	JHTR01000045.1	54607	55377	+	939.8	770	154	KDB12381.1	serine threonine-protein kinase nak1
UV8b_1973	JHTR01000007.1	796151	797297	+	1513.9	1146	1529	KDB17376.1	putative Rho guanyl nucleotide exchange factor (Rom2)
UV8b_3085	JHTR01000012.1	522607	524037	+	2627.4	1430	644	KDB16155.1	IFRD domain-containing protein
UV8b_6169	JHTR01000037.1	111648	114361	+	4099.2	2713	1596	KDB12967.1	small GTPase-binding protein
UV8b_6778	JHTR01000045.1	146010	147622	+	2657.8	1612	644	KDB12415.1	putative actin polymerization protein Bzz1
UV8b_5248	JHTR01000028.1	272774	273649	+	1290.1	875	-2347	KDB13914.1	hypothetical protein UV8b_5248
UV8b_6940	JHTR01000048.1	193454	194206	+	997.5	752	-1460	KDB12236.1	alcohol dehydrogenase
UV8b_5722	JHTR01000032.1	82408	84039	+	2386.9	1631	762	KDB13343.1	pyruvate dehydrogenase kinase
UV8b_1181	JHTR01000004.1	89991	91067	+	1010	1076	263	KDB17814.1	eukaryotic translation initiation factor 3 subunit 3
UV8b_338	JHTR01000001.1	1124867	1126144	+	1988.9	1277	615	KDB18947.1	putative importin beta-5 subunit
UV8b_6658	JHTR01000044.1	45060	45825	+	953	765	-945	KDB12434.1	Mitochondrial import inner membrane translocase subunit tim-50
UV8b_5685	JHTR01000031.1	404033	405172	+	2212.2	1139	599	KDB13587.1	putative serine/threonine kinase
UV8b_2085	JHTR01000008.1	309497	310372	+	1248.9	875	1590	KDB16993.1	hypothetical protein UV8b_2085
UV8b_210	JHTR01000001.1	674390	675641	+	1785.3	1251	448	KDB18819.1	CobW/HypB/UreG, nucleotide-binding domain containing protein
UV8b_7769	JHTR01000072.1	47536	48537	+	1583.1	1001	-800	KDB11376.1	putative eukaryotic translation initiation factor EIF-2B subunit 3
UV8b_1417	JHTR01000005.1	160287	161538	+	2333.7	1251	330	KDB17533.1	DNA replication complex GINS protein psf-3
UV8b_7960	JHTR01000077.1	127986	129655	+	3007.5	1669	278	KDB11227.1	putative OPY2 protein
UV8b_6430	JHTR01000040.1	236607	237233	+	937	626	120	KDB12774.1	splicing factor 3b
UV8b_4437	JHTR01000021.1	24480	25356	+	1220.9	876	890	KDB14581.1	hypothetical protein UV8b_4437
UV8b_1465	JHTR01000005.1	322193	322983	+	1018.9	790	-161	KDB17581.1	PAB1 binding protein (Pbp1)
UV8b_1512	JHTR01000005.1	489901	491560	+	3297.5	1659	1080	KDB17628.1	peroxin 11C
UV8b_2410	JHTR01000009.1	563670	564420	+	1397.2	750	540	KDB16819.1	cell division control protein 12
UV8b_6508	JHTR01000041.1	172139	172639	+	290.9	500	334	KDB12662.1	BCAS2 family protein
UV8b_411	JHTR01000001.1	1699397	1701112	+	2432.8	1715	948	KDB19020.1	phenylalanyl-tRNA synthetase, beta subunit
UV8b_4065	JHTR01000019.1	25574	27550	+	2419.1	1976	756	KDB14919.1	NADH-ubiquinone oxidoreductase
UV8b_2708	JHTR01000011.1	89785	90660	+	1183.4	875	67	KDB16252.1	Mitochondrial inner membrane protease ATP23
UV8b_3060	JHTR01000012.1	449378	450901	+	2857.6	1523	443	KDB16130.1	Nucleoporin NSP1
UV8b_7923	JHTR01000076.1	51282	52422	+	1843.9	1140	738	KDB11248.1	nuclear migration protein nudF
UV8b_5328	JHTR01000028.1	507644	509563	+	2957.2	1919	950	KDB13994.1	DUF89 domain-containing protein
UV8b_1642	JHTR01000005.1	879527	882016	+	3915.6	2489	121	KDB17758.1	hypothetical protein UV8b_1642
UV8b_161	JHTR01000001.1	500537	501288	+	1021.5	751	-777	KDB18770.1	hypothetical protein UV8b_161
UV8b_6199	JHTR01000037.1	197129	198890	+	3919.4	1761	567	KDB12997.1	hypothetical protein UV8b_6199
UV8b_6764	JHTR01000045.1	103161	106358	+	5999.1	3197	416	KDB12401.1	hypothetical protein UV8b_6764
UV8b_2449	JHTR01000009.1	686413	687551	+	1596.7	1138	492	KDB16858.1	putative translation initiation factor 4e
UV8b_6908	JHTR01000048.1	115228	116231	+	1370.3	1003	374	KDB12204.1	DUF1716 domain-containing protein
UV8b_1286	JHTR01000004.1	489352	490480	+	2150.8	1128	313	KDB17919.1	pre-mRNA-splicing factor spp2
UV8b_6308	JHTR01000039.1	65425	66805	+	2598.7	1380	559	KDB12814.1	ubiquinone/menaquinone biosynthesis-related protein
UV8b_2952	JHTR01000012.1	137358	139121	+	3560.9	1763	444	KDB16022.1	mitogen-activated protein kinase MAF1
UV8b_1084	JHTR01000003.1	777330	778832	+	3250.2	1502	432	KDB18236.1	hypothetical protein UV8b_1084
UV8b_5901	JHTR01000033.1	252283	253526	+	1760.1	1243	648	KDB13311.1	AP-2 complex subunit beta
UV8b_5283	JHTR01000028.1	357455	358455	+	1351.5	1000	458	KDB13949.1	hypothetical protein UV8b_5283
UV8b_5506	JHTR01000030.1	242716	245049	+	3402	2333	1064	KDB13674.1	C2H2 type zinc finger containing protein
UV8b_7669	JHTR01000067.1	152532	153536	+	1439.8	1004	498	KDB11524.1	SIK1-like protein
UV8b_7780	JHTR01000072.1	80421	81047	+	1106.9	626	334	KDB11387.1	hypothetical protein UV8b_7780
UV8b_8167	JHTR01000085.1	67145	68156	+	1541.4	1011	-111	KDB10992.1	mitochondrial chaperone BCS1
UV8b_1439	JHTR01000005.1	241068	242855	+	2907.7	1787	-124	KDB17555.1	hypothetical protein UV8b_1439
UV8b_5592	JHTR01000031.1	111476	112352	+	1286.3	876	349	KDB13494.1	translation machinery-associated protein 22
UV8b_4782	JHTR01000023.1	516339	517855	+	2515.9	1516	675	KDB14511.1	cystathionine beta-lyase
UV8b_3704	JHTR01000016.1	13922	14567	+	868.3	645	124	KDB15278.1	hypothetical protein UV8b_3704
UV8b_735	JHTR01000002.1	691024	692419	+	2916.5	1395	615	KDB18493.1	anthranilate synthase component 1
UV8b_1750	JHTR01000007.1	14514	15391	+	1298.3	877	244	KDB17153.1	inner membrane magnesium transporter MRS2 precursor
UV8b_3589	JHTR01000015.1	272355	273236	+	1303.5	881	999	KDB15558.1	hypothetical protein UV8b_3589
UV8b_2495	JHTR01000009.1	836371	837255	+	1195.4	884	319	KDB16904.1	Protein transport protein SEC24
UV8b_366	JHTR01000001.1	1566777	1567654	+	1491.5	877	561	KDB18975.1	cation diffusion facilitator 1
UV8b_1726	JHTR01000006.1	696631	697508	+	1172.6	877	128	KDB17469.1	putative SPO76 protein
UV8b_353	JHTR01000001.1	1500170	1501069	+	1204.4	899	332	KDB18962.1	transcription factor spTFIIE alpha subunit
UV8b_7365	JHTR01000059.1	60018	62101	+	3684.2	2083	635	KDB11777.1	hypothetical protein UV8b_7365
UV8b_7215	JHTR01000054.1	194571	195253	+	990.7	682	-109	KDB11986.1	hypothetical protein UV8b_7215
UV8b_388	JHTR01000001.1	1628021	1629022	+	1509.9	1001	1272	KDB18997.1	hypothetical protein UV8b_388
UV8b_6738	JHTR01000045.1	38206	38706	+	241	500	598	KDB12375.1	hypothetical protein UV8b_6738
UV8b_3398	JHTR01000014.1	362639	364434	+	3411.7	1795	891	KDB15758.1	putative homeobox and C2H2 transcription factor
UV8b_4898	JHTR01000024.1	408484	409859	+	2910.3	1375	340	KDB14303.1	40S ribosomal protein S8
UV8b_1887	JHTR01000007.1	503816	505130	+	1909.1	1314	167	KDB17290.1	LAlv9 family protein
UV8b_8354	JHTR01000121.1	25196	25821	+	1064.8	625	-89	KDB10802.1	uridylate kinase
UV8b_2764	JHTR01000011.1	241910	242662	+	1189.3	752	232	KDB16308.1	hypothetical protein UV8b_2764
UV8b_1811	JHTR01000007.1	230702	231954	+	2314.1	1252	752	KDB17214.1	vacuolar membrane PQ loop repeat protein
UV8b_1731	JHTR01000006.1	720058	721324	+	2301.2	1266	863	KDB17474.1	putative RNA binding protein Jsn1
UV8b_5697	JHTR01000031.1	451396	452883	+	2406.2	1487	614	KDB13599.1	putative HLH transcription factor (Hpa3)
UV8b_2564	JHTR01000010.1	185612	186743	+	1694.9	1131	422	KDB16529.1	putative chitin synthase activator (Chs3)
UV8b_4397	JHTR01000020.1	455518	456532	+	1569.7	1014	281	KDB14874.1	hypothetical protein UV8b_4397
UV8b_755	JHTR01000002.1	761876	762502	+	528.6	626	444	KDB18513.1	tRNA (uracil-5-)-methyltransferase TRM9
UV8b_7990	JHTR01000078.1	96214	96839	+	616	625	105	KDB11179.1	hypothetical protein UV8b_7990
UV8b_3727	JHTR01000016.1	87881	88639	+	1130	758	304	KDB15301.1	putative ANP1 protein
UV8b_4808	JHTR01000024.1	52642	53644	+	1329.1	1002	785	KDB14213.1	benzoate 4-monooxygenase
UV8b_2950	JHTR01000012.1	131753	133132	+	2402.2	1379	367	KDB16020.1	hypothetical protein UV8b_2950
UV8b_4393	JHTR01000020.1	442569	445293	+	4466.8	2724	1223	KDB14870.1	SAM and PH domain-containing protein
UV8b_6348	JHTR01000039.1	272727	273227	+	712.7	500	-1282	KDB12854.1	hypothetical protein UV8b_6348
UV8b_2831	JHTR01000011.1	462361	463362	+	1610.2	1001	564	KDB16375.1	putative chromatin remodeling complex subunit (Arp8)
UV8b_3829	JHTR01000016.1	391805	392808	+	1356.7	1003	-113	KDB15403.1	hypothetical protein UV8b_3829
UV8b_702	JHTR01000002.1	609519	611444	+	3503.2	1925	865	KDB18460.1	hypothetical protein UV8b_702
UV8b_5657	JHTR01000031.1	306962	307851	+	1116.1	889	305	KDB13559.1	putative DNA-directed RNA polymerase II chain Rpb7
UV8b_7321	JHTR01000058.1	73514	76437	+	4223	2923	1165	KDB11808.1	prp 4 CRoW domain-containing protein
UV8b_2847	JHTR01000011.1	491473	493265	+	2386.9	1792	-107	KDB16391.1	putative C2H2 transcription factor (TFIIIA)
UV8b_4477	JHTR01000021.1	144580	145832	+	2116.7	1252	731	KDB14621.1	hypothetical protein UV8b_4477
UV8b_797	JHTR01000002.1	912470	913976	+	2711.7	1506	283	KDB18555.1	vegetative cell wall protein gp1
UV8b_5849	JHTR01000033.1	123530	124536	+	1432.5	1006	822	KDB13259.1	nitrogen response regulator
UV8b_2754	JHTR01000011.1	211888	214491	+	4261.4	2603	5	KDB16298.1	hypothetical protein UV8b_2754
UV8b_4971	JHTR01000025.1	383851	384476	+	987.6	625	379	KDB14181.1	diphthamide biosynthesis protein 2
UV8b_7007	JHTR01000049.1	161878	163155	+	1824.8	1277	333	KDB12183.1	putative endoglucanase
UV8b_1267	JHTR01000004.1	408881	410521	+	2691.2	1640	508	KDB17900.1	Guanine nucleotide-binding protein alpha subunit
UV8b_445	JHTR01000001.1	1925064	1926578	+	2481	1514	731	KDB19054.1	putative aminopeptidase
UV8b_6641	JHTR01000043.1	103065	103565	+	760.7	500	267	KDB12516.1	GTP cyclohydrolase-2
UV8b_1694	JHTR01000006.1	527163	528294	+	1493.7	1131	489	KDB17437.1	60S ribosomal protein L10A
UV8b_5231	JHTR01000028.1	216703	218293	+	1909.3	1590	801	KDB13897.1	glycosyltransferase family 31 protein
UV8b_7282	JHTR01000057.1	110526	111026	+	449.6	500	155	KDB11859.1	benzoate 4-monooxygenase cytochrome p450
UV8b_7600	JHTR01000066.1	82518	83270	+	1076.1	752	326	KDB11558.1	SCF complex subunit Skp1
UV8b_7328	JHTR01000058.1	106285	107410	+	1695.1	1125	1301	KDB11815.1	oxidoreductase, 2-nitropropane dioxygenase family
UV8b_3737	JHTR01000016.1	122218	122969	+	1002.2	751	-827	KDB15311.1	transcription factor c2h2
UV8b_5972	JHTR01000034.1	267426	268052	+	829	626	1688	KDB13212.1	hypothetical protein UV8b_5972
UV8b_2353	JHTR01000009.1	381770	382772	+	1271.5	1002	427	KDB16762.1	hypothetical protein UV8b_2353
UV8b_2065	JHTR01000008.1	224819	225698	+	1362.6	879	316	KDB16973.1	OBG family small GTPase
UV8b_8085	JHTR01000081.1	99091	99591	+	447.7	500	-939	KDB11097.1	zinc knuckle domain containing protein
UV8b_1075	JHTR01000003.1	746988	748757	+	3898.7	1769	769	KDB18227.1	Transcriptional activator hac1
UV8b_1571	JHTR01000005.1	665570	667079	+	2730.3	1509	41	KDB17687.1	hypothetical protein UV8b_1571
UV8b_5620	JHTR01000031.1	186285	187932	+	3362.2	1647	576	KDB13522.1	mRNA splicing factor RNA helicase
UV8b_3209	JHTR01000013.1	254941	255958	+	1492.5	1017	296	KDB15897.1	nonsense-mediated mRNA decay factor (Upf2)
UV8b_1218	JHTR01000004.1	262740	263490	+	1064.6	750	289	KDB17851.1	putative cyanate lyase
UV8b_8188	JHTR01000088.1	32692	33192	+	729.2	500	2897	KDB10955.1	asparaginase-like protein
UV8b_929	JHTR01000003.1	266963	268909	+	3455.5	1946	829	KDB18081.1	putative cell polarity protein
UV8b_5382	JHTR01000029.1	227878	228504	+	896	626	187	KDB13775.1	putative proteasome regulatory particle subunit (RpnC)
UV8b_998	JHTR01000003.1	522193	522693	+	715.1	500	195	KDB18150.1	decaprenyl-diphosphate synthase subunit 1
UV8b_3049	JHTR01000012.1	416932	418125	+	1308.9	1193	570	KDB16119.1	cytochrome C1 heme lyase
UV8b_1676	JHTR01000006.1	23895	24520	+	1299	625	363	KDB17419.1	XAP5 domain containing protein
UV8b_945	JHTR01000003.1	323204	323954	+	1154.5	750	127	KDB18097.1	DNA-directed RNA polymerase II subunit RPB1
UV8b_8102	JHTR01000082.1	34271	36639	+	4728.6	2368	833	KDB11038.1	Phosphorus acquisition-controlling protein
UV8b_1276	JHTR01000004.1	445849	447154	+	2462.9	1305	254	KDB17909.1	Longevity-assurance family protein
UV8b_4950	JHTR01000024.1	535502	536252	+	1170.5	750	326	KDB14355.1	Mitochondrial import inner membrane translocase subunit TIM17
UV8b_7837	JHTR01000074.1	43998	45936	+	2759.2	1938	552	KDB11308.1	RING-8 protein
UV8b_7409	JHTR01000061.1	17382	18142	+	958	760	1650	KDB11700.1	zinc finger protein
UV8b_4269	JHTR01000020.1	83460	84211	+	991.1	751	249	KDB14746.1	hypothetical protein UV8b_4269
UV8b_1962	JHTR01000007.1	762026	763538	+	2658	1512	1115	KDB17365.1	ribosomal protein L24E
UV8b_4548	JHTR01000021.1	475335	476739	+	1950.3	1404	371	KDB14692.1	hypothetical protein UV8b_4548
UV8b_8283	JHTR01000102.1	33143	34549	+	2361.5	1406	2021	KDB10879.1	hypothetical protein UV8b_8283
UV8b_4366	JHTR01000020.1	350550	351508	+	1382.8	958	509	KDB14843.1	RNase L inhibitor of the ABC superfamily
UV8b_1914	JHTR01000007.1	598558	599817	+	1876.8	1259	774	KDB17317.1	Isocitrate dehydrogenase
UV8b_6605	JHTR01000042.1	179682	180883	+	1904.1	1201	453	KDB12584.1	maleylacetate
UV8b_5709	JHTR01000032.1	40587	42091	+	3474	1504	526	KDB13330.1	u3 small nucleolar RNA-associated protein 5
UV8b_5042	JHTR01000026.1	168643	170990	+	4994.5	2347	735	KDB14053.1	hypothetical protein UV8b_5042
UV8b_7767	JHTR01000072.1	41287	42546	+	2286.6	1259	222	KDB11374.1	hypothetical protein UV8b_7767
UV8b_5067	JHTR01000026.1	259064	260195	+	1942.7	1131	211	KDB14078.1	putative cell wall protein
UV8b_6196	JHTR01000037.1	187411	188550	+	1802.7	1139	470	KDB12994.1	putative actin-interacting protein AIP3
UV8b_6622	JHTR01000042.1	239669	241266	+	2388.3	1597	644	KDB12601.1	Pyruvate kinase
UV8b_7998	JHTR01000078.1	126989	128001	+	1771.9	1012	97	KDB11187.1	putative cell wall proline rich protein
UV8b_1077	JHTR01000003.1	750934	752066	+	1427.5	1132	516	KDB18229.1	NADH-ubiquinone oxidoreductase 21 kDa subunit
UV8b_6271	JHTR01000038.1	161026	163163	+	4277.4	2137	396	KDB12910.1	hypothetical protein UV8b_6271
UV8b_4531	JHTR01000021.1	338358	339213	+	1240.2	855	25	KDB14675.1	putative eukaryotic translation initiation factor 3 subunit EifCk
UV8b_2822	JHTR01000011.1	437581	438582	+	1457.4	1001	-467	KDB16366.1	hypothetical protein UV8b_2822
UV8b_2805	JHTR01000011.1	381644	383578	+	3187.1	1934	1458	KDB16349.1	MEAB protein
UV8b_1991	JHTR01000007.1	838501	841119	+	3582.3	2618	53	KDB17394.1	60s ribosomal protein l17
UV8b_8034	JHTR01000080.1	94747	95759	+	1721.7	1012	534	KDB11124.1	hypothetical protein UV8b_8034
UV8b_6090	JHTR01000036.1	212097	212597	+	759.3	500	186	KDB13090.1	elongation of fatty acids protein 3
UV8b_8224	JHTR01000092.1	44478	45611	+	1716.1	1133	540	KDB10930.1	eukaryotic translation initiation factor 3 subunit F
UV8b_8152	JHTR01000083.1	89285	91188	+	3236.3	1903	256	KDB11024.1	hypothetical protein UV8b_8152
UV8b_4261	JHTR01000020.1	65214	66215	+	1596.5	1001	562	KDB14738.1	glutamyl-tRNA amidotransferase, A subunit
UV8b_7285	JHTR01000057.1	121962	122846	+	1465.9	884	483	KDB11862.1	putative class I glutamine amidotransferase
UV8b_1242	JHTR01000004.1	335643	336907	+	2007.2	1264	350	KDB17875.1	histone H3 lysine 36 (K36) methyltransferase
UV8b_7245	JHTR01000056.1	117852	118952	+	1404	1100	490	KDB11920.1	Quinate repressor
UV8b_7654	JHTR01000067.1	107578	108078	+	779.3	500	35	KDB11509.1	putative integral membrane protein (Ytp1)
UV8b_5195	JHTR01000028.1	110764	111264	+	777.7	500	2556	KDB13861.1	amine oxidase
UV8b_5853	JHTR01000033.1	137231	138641	+	2277.9	1410	129	KDB13263.1	topoisomerase II-associated protein PAT1
UV8b_4370	JHTR01000020.1	363830	365174	+	2017.3	1344	791	KDB14847.1	homeobox transcription factor
UV8b_5682	JHTR01000031.1	395888	397722	+	2893.4	1834	121	KDB13584.1	putative cyclin-like protein (Clg1)
UV8b_7738	JHTR01000071.1	104382	105148	+	1115.6	766	631	KDB11425.1	hypothetical protein UV8b_7738
UV8b_2196	JHTR01000008.1	687124	688524	+	1991	1400	529	KDB17104.1	hypothetical protein UV8b_2196
UV8b_1715	JHTR01000006.1	621111	621986	+	1212.4	875	573	KDB17458.1	DUF1649 domain protein
UV8b_5399	JHTR01000029.1	360998	362131	+	1609.9	1133	505	KDB13792.1	Vid27 family protein
UV8b_7406	JHTR01000061.1	3720	4761	+	1793.7	1041	123	KDB11697.1	VPS9 domain protein
UV8b_3211	JHTR01000013.1	263297	264620	+	1858	1323	456	KDB15899.1	Heat shock protein Hsp88
UV8b_889	JHTR01000003.1	142701	143606	+	1375.5	905	189	KDB18041.1	cell division cycle protein
UV8b_6334	JHTR01000039.1	233085	233973	+	1419.7	888	1345	KDB12840.1	putative alanine aminotransferase
UV8b_387	JHTR01000001.1	1625825	1626450	+	1042.4	625	562	KDB18996.1	WD repeat protein
UV8b_3072	JHTR01000012.1	496425	497452	+	1133.8	1027	183	KDB16142.1	spermidine synthase
UV8b_8424	JHTR01000408.1	329	2304	+	3026.6	1975	689	KDB10730.1	swim zinc finger domain protein
UV8b_6503	JHTR01000041.1	155648	156398	+	931.8	750	732	KDB12657.1	MAP kinase kinase EMK1
UV8b_449	JHTR01000001.1	1943098	1943978	+	1292.6	880	196	KDB19058.1	26S protease regulatory subunit 8
UV8b_5096	JHTR01000026.1	354849	356060	+	1779.2	1211	349	KDB14107.1	hypothetical protein UV8b_5096
UV8b_4409	JHTR01000020.1	505249	507339	+	2992.2	2090	797	KDB14886.1	NUDIX domain-containing protein
UV8b_3871	JHTR01000016.1	545450	546207	+	1038	757	94	KDB15445.1	DUF803 domain membrane protein
UV8b_3249	JHTR01000013.1	403669	405071	+	2216.7	1402	352	KDB15937.1	fatty acid synthase beta subunit dehydratase
UV8b_8248	JHTR01000095.1	33831	34968	+	1782	1137	798	KDB10910.1	hypothetical protein UV8b_8248
UV8b_1888	JHTR01000007.1	506749	508035	+	1996.9	1286	415	KDB17291.1	stress-activated MAP kinase
UV8b_5271	JHTR01000028.1	331669	332971	+	1991	1302	1147	KDB13937.1	60S ribosomal protein L13
UV8b_2130	JHTR01000008.1	423513	426136	+	4782.2	2623	1095	KDB17038.1	KH domain-containing protein
UV8b_3524	JHTR01000015.1	97856	99252	+	2248	1396	2101	KDB15493.1	hypothetical protein UV8b_3524
UV8b_3758	JHTR01000016.1	195169	196873	+	3035.3	1704	1650	KDB15332.1	hypothetical protein UV8b_3758
UV8b_3943	JHTR01000018.1	122962	125360	+	3409.8	2398	188	KDB15103.1	hypothetical protein UV8b_3943
UV8b_5175	JHTR01000028.1	57094	58970	+	2516.1	1876	-111	KDB13841.1	putative cytochrome c oxidase assembly protein
UV8b_4253	JHTR01000020.1	48204	49090	+	1215.9	886	-7	KDB14730.1	cytoplasm to vacuole targeting Vps64
UV8b_2865	JHTR01000011.1	536118	536871	+	974.2	753	220	KDB16409.1	hypothetical protein UV8b_2865
UV8b_7729	JHTR01000071.1	77599	78378	+	857	779	318	KDB11416.1	hypothetical protein UV8b_7729
UV8b_2778	JHTR01000011.1	277536	279369	+	3432.4	1833	1279	KDB16322.1	Preprotein translocase subunit
UV8b_7268	JHTR01000057.1	31417	32292	+	1091.4	875	466	KDB11845.1	putative DUF300 domain protein
UV8b_5001	JHTR01000026.1	25880	27650	+	3576.4	1770	346	KDB14012.1	cystathionine gamma-lyase
UV8b_6064	JHTR01000036.1	125078	125954	+	1324.4	876	468	KDB13064.1	putative histone acetyltransferase subunit (Yaf9)
UV8b_7867	JHTR01000075.1	27274	28401	+	1791.6	1127	293	KDB11257.1	putative Lipoyltransferase
UV8b_4066	JHTR01000019.1	32461	33608	+	1958.5	1147	-248	KDB14920.1	mitochondrial carrier protein
UV8b_4704	JHTR01000023.1	286296	287814	+	2396.5	1518	562	KDB14433.1	hypothetical protein UV8b_4704
UV8b_3007	JHTR01000012.1	283774	286085	+	4140.6	2311	844	KDB16077.1	F-box protein
UV8b_2299	JHTR01000009.1	193182	193939	+	1216.6	757	371	KDB16708.1	RNA recognition motif family protein
UV8b_7207	JHTR01000054.1	170629	172642	+	4061.1	2013	1028	KDB11978.1	Ran1-like protein kinase
UV8b_3568	JHTR01000015.1	221784	222661	+	1372.7	877	451	KDB15537.1	mitochondrial carrier protein LEU5
UV8b_2492	JHTR01000009.1	824896	827112	+	3354.5	2216	-156	KDB16901.1	uroporphyrinogen-III synthase
UV8b_7261	JHTR01000056.1	161013	162616	+	2664.6	1603	423	KDB11936.1	glycosyltransferase family 31
UV8b_2125	JHTR01000008.1	405027	406403	+	2825.4	1376	301	KDB17033.1	CDK-activating kinase assembly factor MAT1
UV8b_2535	JHTR01000010.1	94844	96075	+	1578.9	1231	483	KDB16500.1	60S ribosomal protein L32
UV8b_6558	JHTR01000042.1	23771	26226	+	3906.4	2455	1042	KDB12537.1	dihydroxy-acid dehydratase
UV8b_6025	JHTR01000036.1	14847	15980	+	2083.3	1133	217	KDB13025.1	hypercellular protein HypA
UV8b_1128	JHTR01000003.1	919952	921329	+	2326.6	1377	337	KDB18280.1	vacuolar protein sorting-associated protein VPS4
UV8b_5879	JHTR01000033.1	199630	201813	+	4229.6	2183	1224	KDB13289.1	kinesin
UV8b_39	JHTR01000001.1	144177	145443	+	2217.2	1266	400	KDB18648.1	arg-6 protein precursor
UV8b_6710	JHTR01000044.1	215336	216461	+	1954.7	1125	5839	KDB12486.1	putative transcription regulatory protein
UV8b_6482	JHTR01000041.1	96409	97160	+	976.8	751	285	KDB12636.1	isoleucyl-tRNA synthetase
UV8b_2151	JHTR01000008.1	493011	494139	+	1798.9	1128	471	KDB17059.1	hypothetical protein UV8b_2151
UV8b_3053	JHTR01000012.1	423898	424398	+	630.8	500	-17	KDB16123.1	vacuolar ATP synthase 16 kda proteolipid subunit
UV8b_4937	JHTR01000024.1	504025	504903	+	1307.2	878	380	KDB14342.1	NADH-ubiquinone oxidoreductase-like protein
UV8b_8285	JHTR01000102.1	37529	38029	+	768.2	500	188	KDB10881.1	vacuolar transporter chaperone 1
UV8b_5700	JHTR01000032.1	70	1735	+	2565.5	1665	63	KDB13321.1	putative methylglutaconyl-CoA hydratase precursor
UV8b_6775	JHTR01000045.1	139049	140176	+	1647.3	1127	574	KDB12412.1	acidic ribosomal protein P1
UV8b_681	JHTR01000002.1	562445	563070	+	945	625	323	KDB18439.1	NADH-ubiquinone oxidoreductase 78 kDa subunit
UV8b_2179	JHTR01000008.1	627386	628388	+	1554.8	1002	274	KDB17087.1	DNA damage-inducible protein 1
UV8b_2800	JHTR01000011.1	362081	363100	+	1388.4	1019	249	KDB16344.1	tRNA exportin
UV8b_6393	JHTR01000040.1	110276	112251	+	4412.9	1975	886	KDB12737.1	hypothetical protein UV8b_6393
UV8b_5160	JHTR01000028.1	9911	10544	+	507.9	633	480	KDB13826.1	hypothetical protein UV8b_5160
UV8b_6362	JHTR01000040.1	16319	18247	+	2983.5	1928	659	KDB12706.1	hypothetical protein UV8b_6362
UV8b_3224	JHTR01000013.1	323238	323738	+	701.2	500	495	KDB15912.1	ribosome biogenesis protein urb1
UV8b_1361	JHTR01000004.1	706466	707597	+	1631.6	1131	309	KDB17994.1	hypothetical protein UV8b_1361
UV8b_4079	JHTR01000019.1	78327	79454	+	2098.8	1127	534	KDB14933.1	putative methionyl aminopeptidase
UV8b_2839	JHTR01000011.1	475588	477308	+	2759	1720	741	KDB16383.1	DNAJ domain containing protein
UV8b_4858	JHTR01000024.1	247902	248613	+	952.8	711	385	KDB14263.1	mitochondrial intermembrane space protein Mia40
UV8b_933	JHTR01000003.1	278984	280237	+	1869.5	1253	1060	KDB18085.1	PA domain-containing protein
UV8b_7994	JHTR01000078.1	111931	114892	+	5512.1	2961	1441	KDB11183.1	hypothetical protein UV8b_7994
UV8b_4353	JHTR01000020.1	308268	309270	+	1750.7	1002	261	KDB14830.1	hypothetical protein UV8b_4353
UV8b_2875	JHTR01000011.1	571338	571838	+	594.5	500	205	KDB16419.1	acyl CoA ligase-like protein
UV8b_5568	JHTR01000031.1	42741	43530	+	1203	789	2489	KDB13470.1	GTP-binding nuclear protein RAN/TC4
UV8b_3521	JHTR01000015.1	84895	86289	+	2305	1394	1093	KDB15490.1	putative AMP-binding enzyme
UV8b_8245	JHTR01000095.1	26366	28027	+	2970.4	1661	724	KDB10907.1	homoaconitase
UV8b_5015	JHTR01000026.1	81667	83049	+	2151.3	1382	604	KDB14026.1	60S ribosomal protein L9
UV8b_6964	JHTR01000049.1	22335	22960	+	720.9	625	2589	KDB12140.1	Sec7 domain-containing protein
UV8b_4461	JHTR01000021.1	112249	113759	+	2530.9	1510	633	KDB14605.1	hypothetical protein UV8b_4461
UV8b_1757	JHTR01000007.1	46422	46922	+	498	500	127	KDB17160.1	small oligopeptide transporter, OPT family
UV8b_7612	JHTR01000066.1	144563	145823	+	2077.1	1260	376	KDB11570.1	hypothetical protein UV8b_7612
UV8b_548	JHTR01000002.1	143783	144792	+	1516	1009	564	KDB18306.1	Guanylate-binding protein (GBP)
UV8b_4359	JHTR01000020.1	326789	329434	+	4663.4	2645	1138	KDB14836.1	RhoGAP domain containing protein
UV8b_1758	JHTR01000007.1	50062	51062	+	1525.2	1000	2475	KDB17161.1	hypothetical protein UV8b_1758
UV8b_2838	JHTR01000011.1	473072	474076	+	983.8	1004	2095	KDB16382.1	putative short-chain dehydrogenase
UV8b_486	JHTR01000001.1	2052183	2052935	+	941	752	439	KDB19095.1	putative pre-rRNA processing protein
UV8b_7166	JHTR01000053.1	106239	107118	+	1262	879	291	KDB12023.1	cation efflux family protein family
UV8b_3850	JHTR01000016.1	481339	481839	+	842.2	500	208	KDB15424.1	potassium channel regulatory factor
UV8b_6987	JHTR01000049.1	103211	104087	+	1260.2	876	315	KDB12163.1	iron sulfur assembly protein 1
UV8b_4499	JHTR01000021.1	210296	213171	+	4515.3	2875	-707	KDB14643.1	hypothetical protein UV8b_4499
UV8b_3043	JHTR01000012.1	401277	402430	+	1826.7	1153	163	KDB16113.1	putative ubiquinone biosynthesis protein
UV8b_1929	JHTR01000007.1	626936	630755	+	10924.2	3819	-5	KDB17332.1	hypothetical protein UV8b_1929
UV8b_2380	JHTR01000009.1	485596	486096	+	570.5	500	2184	KDB16789.1	pantetheine-phosphate adenylyltransferase family protein
UV8b_560	JHTR01000002.1	181105	181855	+	1466.1	750	767	KDB18318.1	alanine racemase family protein (ISS)
UV8b_7653	JHTR01000067.1	104798	105298	+	486.5	500	461	KDB11508.1	hypothetical protein UV8b_7653
UV8b_356	JHTR01000001.1	1540200	1541549	+	1898.3	1349	246	KDB18965.1	putative FZR protein (fizzy-related protein)
UV8b_1482	JHTR01000005.1	380274	381651	+	1677.9	1377	1150	KDB17598.1	DNA-directed RNA polymerase III 130 kDa polypeptide
UV8b_1970	JHTR01000007.1	787636	788903	+	1936.4	1267	145	KDB17373.1	pal1 cell morphology protein
UV8b_4840	JHTR01000024.1	176736	177863	+	1703.8	1127	-69	KDB14245.1	HEAT repeat containing protein
UV8b_6601	JHTR01000042.1	166983	167612	+	859.1	629	332	KDB12580.1	putative 26S proteasome regulatory subunit Rpn2
UV8b_647	JHTR01000002.1	465141	466266	+	2004.9	1125	249	KDB18405.1	RNA splicing factor Pad-1
UV8b_2313	JHTR01000009.1	233594	234220	+	1034.4	626	228	KDB16722.1	hypothetical protein UV8b_2313
UV8b_5689	JHTR01000031.1	420114	421916	+	3026.1	1802	803	KDB13591.1	RSC complex subunit Rsc7
UV8b_6240	JHTR01000038.1	42941	44714	+	3097.9	1773	1018	KDB12879.1	putative GDP/GTP exchange factor Sec2p
UV8b_6189	JHTR01000037.1	165722	167425	+	3089.9	1703	698	KDB12987.1	putative Serine/threonine-protein kinase nrc-2
UV8b_1716	JHTR01000006.1	623281	625912	+	5865.4	2631	891	KDB17459.1	forkhead box protein L2
UV8b_7900	JHTR01000075.1	119974	120731	+	1181.6	757	382	KDB11290.1	putative nuclear pore protein NUP57
UV8b_5331	JHTR01000029.1	74043	74543	+	710.6	500	550	KDB13724.1	putative dihydrouridine synthase family protein
UV8b_2506	JHTR01000009.1	860105	860985	+	1249.1	880	269	KDB16915.1	LDB17 protein
UV8b_8141	JHTR01000083.1	50605	52009	+	1840.6	1404	-26	KDB11013.1	hypothetical protein UV8b_8141
UV8b_4772	JHTR01000023.1	486181	487650	+	1964.9	1469	921	KDB14501.1	14-3-3-like protein
UV8b_6731	JHTR01000045.1	7855	9977	+	4296.2	2122	825	KDB12368.1	hypothetical protein UV8b_6731
UV8b_789	JHTR01000002.1	888073	889326	+	1995.2	1253	1913	KDB18547.1	hypothetical protein UV8b_789
UV8b_3709	JHTR01000016.1	30741	31367	+	892	626	521	KDB15283.1	1,3-beta-glucanosyltransferase Gel1
UV8b_5350	JHTR01000029.1	135690	137744	+	3011.3	2054	1127	KDB13743.1	rnapii degradation factor def1
UV8b_2690	JHTR01000011.1	33895	36291	+	3930.9	2396	2328	KDB16234.1	LPXTG-motif cell wall anchor domain-containing protein
UV8b_3461	JHTR01000014.1	562920	563929	+	1548.3	1009	396	KDB15821.1	putative eukaryotic translation initiation factor 3, gamma subunit
UV8b_606	JHTR01000002.1	302729	303745	+	1084.3	1016	500	KDB18364.1	hypothetical protein UV8b_606
UV8b_5907	JHTR01000033.1	272017	273656	+	2772.4	1639	826	KDB13317.1	MutL-like protein
UV8b_3679	JHTR01000015.1	535303	536179	+	1160.6	876	215	KDB15648.1	protein translocation protein, Sec62 family protein
UV8b_595	JHTR01000002.1	267291	269997	+	5393	2706	602	KDB18353.1	hypothetical protein UV8b_595
UV8b_1733	JHTR01000006.1	726667	729725	+	5613.8	3058	1365	KDB17476.1	PAK kinase
UV8b_7515	JHTR01000063.1	123535	126317	+	4763.2	2782	1025	KDB11658.1	Dna-J like membrane chaperone protein
UV8b_1200	JHTR01000004.1	134800	136077	+	2576.3	1277	387	KDB17833.1	hypothetical protein UV8b_1200
UV8b_3903	JHTR01000017.1	507329	508204	+	1266	875	99	KDB15240.1	ATP synthase subunit mitochondrial
UV8b_3953	JHTR01000018.1	146798	148185	+	2192	1387	454	KDB15113.1	hypothetical protein UV8b_3953
UV8b_645	JHTR01000002.1	456755	458655	+	2739	1900	1338	KDB18403.1	aminotransferase
UV8b_7826	JHTR01000074.1	3461	4336	+	1150.5	875	904	KDB11297.1	putative pyridoxamine phosphate oxidase
UV8b_6166	JHTR01000037.1	103076	105307	+	4162.3	2231	19	KDB12964.1	putative pre-rRNA processing protein Tsr1
UV8b_292	JHTR01000001.1	990808	991814	+	1362.8	1006	225	KDB18901.1	AFG1-like ATPase
UV8b_7827	JHTR01000074.1	4872	6523	+	2561.3	1651	1101	KDB11298.1	auxin Efflux Carrier superfamily protein
UV8b_5841	JHTR01000033.1	91998	92498	+	879.1	500	886	KDB13251.1	ELL-associated factor
UV8b_5314	JHTR01000028.1	455344	456600	+	2107	1256	-1794	KDB13980.1	tetratricopeptide repeat domain containing protein
UV8b_8385	JHTR01000170.1	127	752	+	755.5	625	168	KDB10769.1	hypothetical protein UV8b_8385
UV8b_1517	JHTR01000005.1	503951	505345	+	1715.6	1394	371	KDB17633.1	filament-forming protein
UV8b_5652	JHTR01000031.1	298298	299479	+	1752.3	1181	816	KDB13554.1	Autophagy-related protein 22
UV8b_988	JHTR01000003.1	485690	486441	+	1187	751	208	KDB18140.1	Superoxide dismutase
UV8b_1272	JHTR01000004.1	420988	423242	+	4157.3	2254	973	KDB17905.1	cell division control protein Cdc48
UV8b_2515	JHTR01000010.1	19913	20788	+	1662.6	875	292	KDB16480.1	hypothetical protein UV8b_2515
UV8b_6536	JHTR01000041.1	268398	269898	+	2757.1	1500	1533	KDB12690.1	60S ribosomal protein L5
UV8b_8212	JHTR01000092.1	8977	10443	+	2062.1	1466	506	KDB10918.1	Peptide-N4-(N-acetyl-beta-glucosaminyl)asparagine amidase A
UV8b_2658	JHTR01000010.1	551539	552684	+	1666.9	1145	568	KDB16623.1	C6 zinc finger domain protein
UV8b_5007	JHTR01000026.1	45507	48833	+	5253.4	3326	1067	KDB14018.1	hypothetical protein UV8b_5007
UV8b_6295	JHTR01000039.1	18375	18875	+	676	500	299	KDB12801.1	oxidoreductase
UV8b_682	JHTR01000002.1	564666	566052	+	2900.9	1386	330	KDB18440.1	hypothetical protein UV8b_682
UV8b_2481	JHTR01000009.1	794498	795123	+	851.3	625	-1969	KDB16890.1	fatty acid desaturase
UV8b_8193	JHTR01000088.1	46648	48049	+	2096	1401	1368	KDB10960.1	beta-Ala-His dipeptidase
UV8b_5279	JHTR01000028.1	348552	352049	+	4748.6	3497	100	KDB13945.1	oxidoreductase-like protein
UV8b_3010	JHTR01000012.1	297730	298481	+	1081.5	751	1649	KDB16080.1	nuclear pore complex protein Nup107
UV8b_6496	JHTR01000041.1	136086	137214	+	1440.9	1128	352	KDB12650.1	uroporphyrinogen decarboxylase
UV8b_6303	JHTR01000039.1	41791	43480	+	3090.9	1689	670	KDB12809.1	beta-lactamase transpeptidase-like protein
UV8b_3315	JHTR01000014.1	85952	87962	+	3906.4	2010	798	KDB15675.1	calmodulin-dependent protein kinase
UV8b_5948	JHTR01000034.1	184511	185011	+	768.7	500	135	KDB13188.1	SAP domain protein
UV8b_4470	JHTR01000021.1	129058	129933	+	1621.7	875	381	KDB14614.1	hypothetical protein UV8b_4470
UV8b_6399	JHTR01000040.1	125057	126575	+	2370.9	1518	912	KDB12743.1	hypothetical protein UV8b_6399
UV8b_3606	JHTR01000015.1	318570	319070	+	653.9	500	507	KDB15575.1	hypothetical protein UV8b_3606
UV8b_3457	JHTR01000014.1	551739	552364	+	896.8	625	330	KDB15817.1	SDA1 domain containing protein
UV8b_6723	JHTR01000044.1	247384	248287	+	520.6	903	683	KDB12499.1	putative protein CCC1
UV8b_6456	JHTR01000041.1	7538	8757	+	1894.2	1219	173	KDB12610.1	putative multispanning membrane protein
UV8b_3503	JHTR01000015.1	44571	45536	+	1190.5	965	228	KDB15472.1	Bax Inhibitor family protein
UV8b_2902	JHTR01000011.1	647398	648675	+	1865.3	1277	554	KDB16446.1	sulfur controller-2
UV8b_5659	JHTR01000031.1	312074	313650	+	2421	1576	715	KDB13561.1	carbamoyl-phosphate synthase arginine-specific large chain
UV8b_4539	JHTR01000021.1	362448	363856	+	1901.3	1408	584	KDB14683.1	T-complex protein 1 subunit eta
UV8b_4405	JHTR01000020.1	491144	492178	+	1391.7	1034	358	KDB14882.1	zinc finger domain-containing lyar-type
UV8b_624	JHTR01000002.1	374510	376003	+	2409.9	1493	666	KDB18382.1	T-complex protein 1 subunit gamma
UV8b_2148	JHTR01000008.1	483407	484032	+	952.5	625	492	KDB17056.1	DUF292 domain-containing protein
UV8b_8003	JHTR01000079.1	87904	88789	+	1430.8	885	548	KDB11141.1	putative Glc8 protein
UV8b_1727	JHTR01000006.1	704619	705405	+	1195.4	786	158	KDB17470.1	SWI-SNF complex subunit
UV8b_7326	JHTR01000058.1	102248	103673	+	2328.7	1425	381	KDB11813.1	import inner membrane translocase subunit tim-21
UV8b_3212	JHTR01000013.1	270468	271469	+	2004.2	1001	327	KDB15900.1	putative mitochondrial translation initiation factor IF-2
UV8b_2309	JHTR01000009.1	224510	225638	+	1803.9	1128	195	KDB16718.1	mitochondrial ATPase complex subunit ATP10
UV8b_7641	JHTR01000067.1	64437	65725	+	2047	1288	688	KDB11496.1	succinyl-CoA ligase alpha-chain precursor
UV8b_7822	JHTR01000073.1	97956	99227	+	2050.8	1271	394	KDB11360.1	putative importin
UV8b_3192	JHTR01000013.1	192610	194255	+	2532.8	1645	1019	KDB15880.1	hsp70-like protein
UV8b_1190	JHTR01000004.1	107669	110640	+	5680.6	2971	-322	KDB17823.1	chromatin SPT2
UV8b_900	JHTR01000003.1	185373	186499	+	1504.7	1126	523	KDB18052.1	beta-tubulin
UV8b_9	JHTR01000001.1	41162	42168	+	1547.3	1006	233	KDB18618.1	putative ribosomal protein YmL35
UV8b_7277	JHTR01000057.1	95548	96548	+	1627.3	1000	389	KDB11854.1	ATP-dependent RNA helicase DHX8
UV8b_6802	JHTR01000046.1	48437	49446	+	1643.1	1009	255	KDB12315.1	putative ATP binding protein
UV8b_5168	JHTR01000028.1	34464	35848	+	2514.4	1384	549	KDB13834.1	MMS4 protein
UV8b_5367	JHTR01000029.1	181250	183074	+	3321.3	1824	700	KDB13760.1	phospholipid metabolism enzyme
UV8b_8098	JHTR01000082.1	16640	17140	+	767.1	500	-952	KDB11034.1	hypothetical protein UV8b_8098
UV8b_3228	JHTR01000013.1	334585	335085	+	295.6	500	-16	KDB15916.1	inositol monophosphatase
UV8b_544	JHTR01000001.1	2300203	2301465	+	2333.4	1262	728	KDB19153.1	hydroxymethylglutaryl-CoA synthase
UV8b_6409	JHTR01000040.1	162915	164014	+	1299.2	1099	367	KDB12753.1	hypothetical protein UV8b_6409
UV8b_1955	JHTR01000007.1	727154	728426	+	2531.2	1272	2125	KDB17358.1	hypothetical protein UV8b_1955
UV8b_1987	JHTR01000007.1	827947	829206	+	2050.5	1259	500	KDB17390.1	ubiquinol-cytochrome c reductase iron-sulfur subunit
UV8b_6357	JHTR01000040.1	2696	4084	+	1809.3	1388	784	KDB12701.1	Sec14 cytosolic factor
UV8b_2665	JHTR01000010.1	572738	574457	+	2518.7	1719	771	KDB16630.1	putative 60S ribosomal protein L4
UV8b_4895	JHTR01000024.1	385989	387250	+	2083.7	1261	44	KDB14300.1	40S ribosomal protein S6
UV8b_6403	JHTR01000040.1	137129	138258	+	1605.2	1129	386	KDB12747.1	far upstream element-binding protein 2
UV8b_2550	JHTR01000010.1	150991	153015	+	2897.6	2024	458	KDB16515.1	NADPH oxidase regulator NoxR
UV8b_6549	JHTR01000042.1	5020	5770	+	1019.6	750	334	KDB12528.1	cell cycle control protein
UV8b_5878	JHTR01000033.1	195695	197760	+	2889.6	2065	64	KDB13288.1	putative ubiquitin conjugating enzyme
UV8b_4238	JHTR01000019.1	551866	552366	+	614.8	500	275	KDB15092.1	putative siroheme synthase Met8
UV8b_2376	JHTR01000009.1	464033	465034	+	1491.5	1001	239	KDB16785.1	putative SNF2 family helicase/ATPase
UV8b_825	JHTR01000002.1	993682	994988	+	2902.1	1306	282	KDB18583.1	hypothetical protein UV8b_825
UV8b_4077	JHTR01000019.1	72669	74590	+	3039.1	1921	801	KDB14931.1	dicarboxylic amino acid permease
UV8b_776	JHTR01000002.1	837105	838260	+	1577.9	1155	547	KDB18534.1	glycoside hydrolase family 63
UV8b_2140	JHTR01000008.1	456733	458263	+	2495.1	1530	809	KDB17048.1	putative cation channel family transporter
UV8b_1802	JHTR01000007.1	202253	203137	+	1077.3	884	849	KDB17205.1	phospholipid-translocating P-type ATPase domain-containing protein
UV8b_3877	JHTR01000016.1	558922	559798	+	1276.4	876	37	KDB15451.1	hypothetical protein UV8b_3877
UV8b_2782	JHTR01000011.1	285071	285571	+	722.1	500	312	KDB16326.1	GTP-binding protein SAR1
UV8b_3888	JHTR01000017.1	34062	36010	+	2610.9	1948	-239	KDB15225.1	pre-mRNA splicing factor SYF1
UV8b_3832	JHTR01000016.1	423000	424004	+	1357.6	1004	223	KDB15406.1	N-terminal binuclear Zn cluster-containing/DNA binding domain-containing protein
UV8b_324	JHTR01000001.1	1087896	1089172	+	2126.3	1276	376	KDB18933.1	serine/threonine protein phosphatase PP2A catalytic subunit
UV8b_6358	JHTR01000040.1	4770	6152	+	2189.2	1382	437	KDB12702.1	YagE family protein
UV8b_2387	JHTR01000009.1	504978	506141	+	1682.9	1163	945	KDB16796.1	serine/threonine-protein phosphatase 5
UV8b_7292	JHTR01000057.1	147203	148203	+	1542.8	1000	350	KDB11869.1	oxidoreductase, short chain dehydrogenase/reductase family
UV8b_6113	JHTR01000036.1	295415	296549	+	1554.4	1134	329	KDB13113.1	mitochondrion protein
UV8b_1509	JHTR01000005.1	482809	484782	+	2775.7	1973	569	KDB17625.1	60S ribosomal protein L7
UV8b_3083	JHTR01000012.1	518121	520212	+	3590.6	2091	-231	KDB16153.1	forkhead associated domain-containing protein
UV8b_76	JHTR01000001.1	266570	270053	+	4848.6	3483	-339	KDB18685.1	Rieske
UV8b_3765	JHTR01000016.1	222939	224826	+	2600.6	1887	344	KDB15339.1	cell differentiation protein rcd1
UV8b_2290	JHTR01000009.1	162799	164840	+	4087.2	2041	648	KDB16699.1	transcription initiation factor tfiid 55 kd subunit
UV8b_5304	JHTR01000028.1	432194	434491	+	2952.9	2297	-316	KDB13970.1	phosphatase family protein
UV8b_8214	JHTR01000092.1	19858	20486	+	965.7	628	-20	KDB10920.1	peptide alpha-N-acetyltransferase
UV8b_3864	JHTR01000016.1	517706	518734	+	1349.1	1028	192	KDB15438.1	putative sphinganine hydroxylase Sur2
UV8b_133	JHTR01000001.1	423915	424916	+	1646.6	1001	249	KDB18742.1	transcription initiation factor TFIID subunit 11
UV8b_1795	JHTR01000007.1	179789	180789	+	1811.4	1000	134	KDB17198.1	low affinity copper transporter
UV8b_6388	JHTR01000040.1	91948	93580	+	2510.2	1632	881	KDB12732.1	hypothetical protein UV8b_6388
UV8b_3671	JHTR01000015.1	520199	521199	+	1739.6	1000	354	KDB15640.1	cyclin-dependent kinases regulatory subunit
UV8b_2380	JHTR01000009.1	483848	484974	+	2953.2	1126	749	KDB16789.1	pantetheine-phosphate adenylyltransferase family protein
UV8b_2426	JHTR01000009.1	619699	620199	+	675.5	500	286	KDB16835.1	methylenetetrahydrofolate reductase 2
UV8b_6843	JHTR01000046.1	230373	230998	+	897.7	625	300	KDB12356.1	ATP synthase subunit 4 precursor
UV8b_1184	JHTR01000004.1	97269	97894	+	796.5	625	601	KDB17817.1	5-azacytidine resistance protein azr1
UV8b_6859	JHTR01000047.1	16472	21137	+	9648	4665	872	KDB12260.1	putative ribosome biogenesis protein Ssf2
UV8b_3018	JHTR01000012.1	315830	316962	+	1672.8	1132	335	KDB16088.1	Regulator of nonsense transcripts 1
UV8b_4263	JHTR01000020.1	68945	69820	+	1469.9	875	207	KDB14740.1	ribonucleotide reductase inhibitor
UV8b_3502	JHTR01000015.1	42389	43531	+	1227.4	1142	443	KDB15471.1	peptide methionine sulfoxide
UV8b_8353	JHTR01000121.1	21350	22481	+	1963.7	1131	399	KDB10801.1	Eukaryotic translation initiation factor 3 subunit M
UV8b_4838	JHTR01000024.1	170311	171761	+	2072.7	1450	683	KDB14243.1	SIT4 phosphatase-associated protein
UV8b_3367	JHTR01000014.1	282824	284227	+	2182.6	1403	538	KDB15727.1	ser/Thr protein phosphatase
UV8b_6065	JHTR01000036.1	127546	129460	+	3531.5	1914	833	KDB13065.1	mitochondrial distribution and morphology protein 34
UV8b_8197	JHTR01000088.1	56647	59143	+	4612.5	2496	-249	KDB10964.1	GPI transamidase component GPI16
UV8b_6477	JHTR01000041.1	78172	79056	+	1227.9	884	150	KDB12631.1	vesicle-mediated transporter Vid24
UV8b_3113	JHTR01000012.1	598838	599588	+	1165.3	750	61	KDB16183.1	putative mitochondrial carrier protein
UV8b_844	JHTR01000002.1	1043452	1044334	+	1255.5	882	276	KDB18602.1	MFS transporter
UV8b_1674	JHTR01000006.1	19794	21282	+	2056.4	1488	691	KDB17417.1	DUF890 domain-containing protein
UV8b_3196	JHTR01000013.1	212559	214345	+	3119.8	1786	503	KDB15884.1	carnitine acetyl transferase
UV8b_7415	JHTR01000061.1	34224	35225	+	1564.3	1001	404	KDB11706.1	enoyl-CoA hydratase precursor
UV8b_6524	JHTR01000041.1	222311	223659	+	1951.2	1348	1260	KDB12678.1	ubiquitin ligase (Nedd4/Rsp5p)
UV8b_492	JHTR01000001.1	2167820	2168570	+	1490.8	750	376	KDB19101.1	mitochondrion organization and biogenesis protein
UV8b_139	JHTR01000001.1	442297	443725	+	2026.8	1428	530	KDB18748.1	urg3
UV8b_8028	JHTR01000080.1	71445	72575	+	1716.1	1130	390	KDB11118.1	cap binding protein
UV8b_6697	JHTR01000044.1	166239	167415	+	1829.1	1176	952	KDB12473.1	acetyl-CoA acetyltransferase
UV8b_2401	JHTR01000009.1	537517	538359	+	721.4	842	547	KDB16810.1	O-sialoglycoprotein endopeptidase
UV8b_931	JHTR01000003.1	273827	275009	+	1642.9	1182	181	KDB18083.1	SH3 domain containing protein
UV8b_4935	JHTR01000024.1	496756	497381	+	859.3	625	297	KDB14340.1	ser/Thr protein phosphatase
UV8b_363	JHTR01000001.1	1559784	1560663	+	1099.2	879	221	KDB18972.1	integral membrane protein
UV8b_8090	JHTR01000081.1	116437	117315	+	1256.4	878	268	KDB11102.1	putative kinetochore protein fta4
UV8b_7324	JHTR01000058.1	93992	95898	+	4587.8	1906	636	KDB11811.1	carbon response regulator
UV8b_54	JHTR01000001.1	200109	201745	+	3061.4	1636	1041	KDB18663.1	acetamidase
UV8b_4893	JHTR01000024.1	381119	382001	+	1171.7	882	611	KDB14298.1	GTP-binding protein
UV8b_6028	JHTR01000036.1	25485	26110	+	901.5	625	387	KDB13028.1	putative MAK16 protein
UV8b_2700	JHTR01000011.1	70542	72043	+	2402.9	1501	549	KDB16244.1	hypothetical protein UV8b_2700
UV8b_6532	JHTR01000041.1	255378	256007	+	760.2	629	113	KDB12686.1	putative phosphatidylserine decarboxylase
UV8b_8027	JHTR01000080.1	68698	70418	+	3116.8	1720	1073	KDB11117.1	phosphoinositide phosphatase
UV8b_5022	JHTR01000026.1	107124	110348	+	5674.5	3224	1525	KDB14033.1	hypothetical protein UV8b_5022
UV8b_6694	JHTR01000044.1	152460	153513	+	1433.4	1053	708	KDB12470.1	putative Cutinase transcription factor 1 alpha
UV8b_4395	JHTR01000020.1	449001	450226	+	2056.4	1225	644	KDB14872.1	FK506-binding protein 2 precursor
UV8b_5583	JHTR01000031.1	88526	90031	+	3253.3	1505	636	KDB13485.1	RNP domain protein
UV8b_686	JHTR01000002.1	577705	578843	+	1767.6	1138	426	KDB18444.1	tRNA (cytosine-5-)-methyltransferase NCL1
UV8b_504	JHTR01000001.1	2189199	2190472	+	1980.4	1273	301	KDB19113.1	protein phosphatase 2A
UV8b_5764	JHTR01000032.1	228209	229355	+	1746.2	1146	946	KDB13385.1	hypothetical protein UV8b_5764
UV8b_717	JHTR01000002.1	645313	646225	+	1442.6	912	595	KDB18475.1	putative ubiquitin-protein ligase (Hul4)
UV8b_836	JHTR01000002.1	1026143	1027277	+	1559.6	1134	1053	KDB18594.1	putative Fungal specific transcription factor
UV8b_4337	JHTR01000020.1	265900	267060	+	2115.3	1160	139	KDB14814.1	putative C2H2 finger domain protein (Gli3)
UV8b_7505	JHTR01000063.1	102857	103896	+	1239.2	1039	142	KDB11648.1	pH-response regulator protein palA/RIM20
UV8b_4830	JHTR01000024.1	130960	132766	+	3604.7	1806	765	KDB14235.1	putative C2H2 finger domain protein
UV8b_4765	JHTR01000023.1	470183	471695	+	2277.7	1512	1027	KDB14494.1	putative calcium P-type ATPase
UV8b_5222	JHTR01000028.1	190346	191555	+	1855.9	1209	551	KDB13888.1	cobalamin-independent methionine synthase
UV8b_7232	JHTR01000056.1	69086	70214	+	1589.7	1128	480	KDB11907.1	ubiquitin
UV8b_291	JHTR01000001.1	985337	987269	+	3479.5	1932	826	KDB18900.1	SH3 domain-containing protein
UV8b_1349	JHTR01000004.1	681135	681635	+	678.8	500	1419	KDB17982.1	hypothetical protein UV8b_1349
UV8b_6850	JHTR01000046.1	244190	245576	+	2311.8	1386	-77	KDB12363.1	putative cell cycle inhibitor Nif1
UV8b_3391	JHTR01000014.1	338838	339714	+	1093.5	876	248	KDB15751.1	hypothetical protein UV8b_3391
UV8b_3250	JHTR01000013.1	408560	409691	+	1716.5	1131	341	KDB15938.1	fatty acid synthase subunit alpha
UV8b_7728	JHTR01000071.1	73998	75297	+	1575.6	1299	901	KDB11415.1	transcription factor Fst12
UV8b_1034	JHTR01000003.1	626379	628846	+	4271.2	2467	1433	KDB18186.1	putative protein kinase (Lkh1)
UV8b_4338	JHTR01000020.1	268169	269546	+	2586.7	1377	293	KDB14815.1	cytosolic Fe-s cluster assembly factor NAR-1
UV8b_7919	JHTR01000076.1	40429	41442	+	1578.6	1013	533	KDB11244.1	Esterase-like protein
UV8b_5671	JHTR01000031.1	354998	355737	+	882.4	739	-49	KDB13573.1	putative GTPase-activating protein of the rho/rac family (LRG1 protein)
UV8b_2173	JHTR01000008.1	582142	583772	+	2924.5	1630	889	KDB17081.1	Signal recognition particle 68 kDa protein
UV8b_6525	JHTR01000041.1	225936	227192	+	1822	1256	445	KDB12679.1	mitochondrial NADH-ubiquinone oxidoreductase 20 kD subunit
UV8b_6553	JHTR01000042.1	11114	13622	+	3359.2	2508	1013	KDB12532.1	cytochrome c oxidase polypeptide iv
UV8b_5895	JHTR01000033.1	238844	239973	+	2460.5	1129	459	KDB13305.1	Pre-rRNA-processing protein ESF2
UV8b_7758	JHTR01000072.1	9743	10753	+	1318.1	1010	3591	KDB11365.1	hypothetical protein UV8b_7758
UV8b_8258	JHTR01000099.1	40994	45270	+	4767.4	4276	859	KDB10900.1	GTP binding protein (EngB)
UV8b_7014	JHTR01000049.1	187390	188015	+	697.9	625	203	KDB12190.1	Complex I intermediate-associated protein 84
UV8b_2081	JHTR01000008.1	296907	297407	+	674.1	500	478	KDB16989.1	FAS1 domain-containing protein
UV8b_7922	JHTR01000076.1	48684	49319	+	598.1	635	643	KDB11247.1	ER membrane protein
UV8b_680	JHTR01000002.1	559523	560413	+	1004.6	890	350	KDB18438.1	hypothetical protein UV8b_680
UV8b_872	JHTR01000003.1	95978	97718	+	3081.7	1740	820	KDB18024.1	ornithine cyclodeaminase
UV8b_2117	JHTR01000008.1	394920	395420	+	560.9	500	232	KDB17025.1	26S proteasome regulatory subunit
UV8b_6897	JHTR01000047.1	176726	177977	+	2061.1	1251	-159	KDB12298.1	hypothetical protein UV8b_6897
UV8b_1479	JHTR01000005.1	361703	364672	+	4606.6	2969	327	KDB17595.1	PSP1 domain-containing protein
UV8b_2235	JHTR01000008.1	830191	832527	+	4981.3	2336	1350	KDB17143.1	putative 6-phosphofructo-2-kinase
UV8b_7631	JHTR01000067.1	39564	41037	+	2628.6	1473	579	KDB11486.1	hypothetical protein UV8b_7631
UV8b_7168	JHTR01000054.1	35379	36277	+	1237.3	898	314	KDB11939.1	glutamate carboxypeptidase
UV8b_7180	JHTR01000054.1	86671	88931	+	4967.2	2260	1524	KDB11951.1	acetolactate synthase precursor
UV8b_5880	JHTR01000033.1	202667	204089	+	2047.2	1422	393	KDB13290.1	Ubiquitin-conjugating enzyme E2
UV8b_578	JHTR01000002.1	223936	224960	+	1479.1	1024	393	KDB18336.1	heme/steroid binding domain protein
UV8b_2883	JHTR01000011.1	600011	600764	+	1234.3	753	362	KDB16427.1	putative DNA directed RNA polymerase II 15 kDa subunit
UV8b_21	JHTR01000001.1	86497	87428	+	1457.2	931	311	KDB18630.1	hypothetical protein UV8b_21
UV8b_2375	JHTR01000009.1	458126	459257	+	1562.1	1131	684	KDB16784.1	signal sequence receptor alpha chain
UV8b_3728	JHTR01000016.1	90785	92108	+	2147.7	1323	367	KDB15302.1	ESCRT-III component
UV8b_5105	JHTR01000026.1	374906	375656	+	1214	750	317	KDB14116.1	DUF1690 domain-containing protein
UV8b_3226	JHTR01000013.1	330498	331390	+	1398.6	892	1252	KDB15914.1	phytase
UV8b_426	JHTR01000001.1	1736126	1736626	+	719.3	500	247	KDB19035.1	acid phosphatase
UV8b_3550	JHTR01000015.1	186745	187370	+	807.8	625	1340	KDB15519.1	hypothetical protein UV8b_3550
UV8b_725	JHTR01000002.1	662757	663257	+	807.3	500	212	KDB18483.1	pre-rRNA processing protein
UV8b_1857	JHTR01000007.1	373649	376030	+	3950.4	2381	534	KDB17260.1	ATP-dependent bile acid permease
UV8b_5250	JHTR01000028.1	278006	278506	+	650.3	500	329	KDB13916.1	pre-mRNA splicing factor ATP-dependent RNA helicase PRP43
UV8b_7676	JHTR01000067.1	168023	169537	+	2669.8	1514	459	KDB11531.1	asparaginyl-tRNA synthetase
UV8b_5623	JHTR01000031.1	196157	197542	+	2127.3	1385	756	KDB13525.1	protein disulfide isomerase
UV8b_4275	JHTR01000020.1	93836	94969	+	1698	1133	101	KDB14752.1	DUF255 domain protein
UV8b_7553	JHTR01000065.1	68177	69429	+	2207.1	1252	835	KDB11586.1	putative RNA binding protein (Arp)
UV8b_2119	JHTR01000008.1	397407	398801	+	3302.5	1394	621	KDB17027.1	adenylate kinase
UV8b_603	JHTR01000002.1	291351	292523	+	1758.7	1172	477	KDB18361.1	60S ribosomal protein L25
UV8b_2258	JHTR01000009.1	61164	62168	+	1676.5	1004	300	KDB16667.1	hypothetical protein UV8b_2258
UV8b_5246	JHTR01000028.1	264837	266754	+	3048.7	1917	861	KDB13912.1	exportin-1
UV8b_7167	JHTR01000053.1	109609	110612	+	1404.7	1003	521	KDB12024.1	putative protein kinase
UV8b_8008	JHTR01000079.1	101761	102390	+	859.8	629	356	KDB11146.1	hypothetical protein UV8b_8008
UV8b_7865	JHTR01000075.1	13305	14314	+	1615.1	1009	516	KDB11255.1	COM1 regulatory protein
UV8b_7909	JHTR01000076.1	11628	14091	+	3702.8	2463	992	KDB11234.1	DUF408 domain protein
UV8b_2302	JHTR01000009.1	202371	203901	+	2346.4	1530	582	KDB16711.1	ADP-ribosylation factor
UV8b_1869	JHTR01000007.1	423009	423636	+	845.4	627	326	KDB17272.1	ubiquitin hydrolase
UV8b_7449	JHTR01000061.1	149706	153127	+	9088.8	3421	1129	KDB11740.1	Leucine Rich Repeat domain protein
UV8b_410	JHTR01000001.1	1696529	1697408	+	1419.3	879	621	KDB19019.1	protein phosphatase PP2A regulatory subunit A
UV8b_142	JHTR01000001.1	448424	449432	+	1007.1	1008	223	KDB18751.1	p47 protein
UV8b_1542	JHTR01000005.1	577950	579893	+	3390.7	1943	554	KDB17658.1	Protein kinase domain containing protein
UV8b_4720	JHTR01000023.1	323368	325900	+	3535.9	2532	600	KDB14449.1	hypothetical protein UV8b_4720
UV8b_2710	JHTR01000011.1	93929	94813	+	1125.3	884	685	KDB16254.1	putative alpha/beta hydrolase
UV8b_450	JHTR01000001.1	1945470	1946603	+	1946.7	1133	466	KDB19059.1	calcium permease
UV8b_3996	JHTR01000018.1	334523	336037	+	2747.2	1514	300	KDB15156.1	elongation factor 1-beta
UV8b_5423	JHTR01000029.1	423248	425812	+	4640.1	2564	108	KDB13816.1	eukaryotic translation initiation factor 3 subunit 6
UV8b_4277	JHTR01000020.1	99886	100512	+	1025	626	330	KDB14754.1	U2 snRNP component IST3
UV8b_3590	JHTR01000015.1	274869	275625	+	750.6	756	330	KDB15559.1	RAB/GTPase
UV8b_4239	JHTR01000019.1	552873	554278	+	2488.8	1405	377	KDB15093.1	putative vacuolar segregation protein (Pep7)
UV8b_3151	JHTR01000012.1	727524	728402	+	1309.1	878	340	KDB16221.1	fatty acid hydroxylase
UV8b_4766	JHTR01000023.1	474120	474894	+	1250.5	774	-24	KDB14495.1	proteasome component PUP3
UV8b_2228	JHTR01000008.1	790351	792097	+	2970.6	1746	-126	KDB17136.1	RNA polymerase II subunit 3
UV8b_5796	JHTR01000032.1	316218	316848	+	850.2	630	325	KDB13417.1	DNA-binding protein SMUBP-2
UV8b_1091	JHTR01000003.1	819616	820743	+	1332.4	1127	222	KDB18243.1	hypothetical protein UV8b_1091
UV8b_3929	JHTR01000017.1	596361	597373	+	1818.7	1012	352	KDB15266.1	GYF domain protein
UV8b_8268	JHTR01000102.1	2173	3426	+	2124	1253	292	KDB10864.1	eukaryotic translation initiation factor 2 beta subunit
UV8b_479	JHTR01000001.1	2031947	2032827	+	1374.1	880	680	KDB19088.1	QDE2-like protein
UV8b_6052	JHTR01000036.1	92053	93305	+	1785.5	1252	42	KDB13052.1	iron sulfur cluster assembly protein
UV8b_3910	JHTR01000017.1	538041	539958	+	2685.3	1917	-186	KDB15247.1	Pre-mRNA polyadenylation factor FIP1
UV8b_2726	JHTR01000011.1	146523	147405	+	1585.2	882	445	KDB16270.1	DNA replication complex GINS protein psf2
UV8b_413	JHTR01000001.1	1706075	1707504	+	3086.6	1429	608	KDB19022.1	putative 40S ribosomal protein S3
UV8b_5896	JHTR01000033.1	240603	241606	+	1618.2	1003	526	KDB13306.1	putative Nonsense-mediated mRNA decay protein 3
UV8b_1662	JHTR01000005.1	936077	937452	+	1868.8	1375	388	KDB17778.1	putative CHIP protein (carboxyl terminus of Hsc70-interacting protein)
UV8b_3225	JHTR01000013.1	326533	328314	+	2927.8	1781	476	KDB15913.1	hypothetical protein UV8b_3225
UV8b_6481	JHTR01000041.1	86424	86924	+	603	500	231	KDB12635.1	trapp complex protein trs85
UV8b_7927	JHTR01000077.1	27702	28707	+	1810	1005	319	KDB11194.1	Translin family protein
UV8b_6111	JHTR01000036.1	292057	293220	+	1428.2	1163	234	KDB13111.1	protein kinase gsk3
UV8b_3616	JHTR01000015.1	364037	365044	+	1299.7	1007	259	KDB15585.1	ATP-dependent protease La
UV8b_5342	JHTR01000029.1	113131	113770	+	895.1	639	770	KDB13735.1	cytochrome c1, heme protein precursor
UV8b_4487	JHTR01000021.1	180081	181333	+	2360	1252	386	KDB14631.1	hypothetical protein UV8b_4487
UV8b_3406	JHTR01000014.1	396373	397124	+	1226.3	751	114	KDB15766.1	serine/threonine-protein kinase SRPK2
UV8b_4423	JHTR01000020.1	542042	543236	+	1571.3	1194	487	KDB14900.1	40S ribosomal protein S13
UV8b_604	JHTR01000002.1	298184	298936	+	1074.5	752	1458	KDB18362.1	hypothetical protein UV8b_604
UV8b_719	JHTR01000002.1	649169	651128	+	3043.6	1959	-201	KDB18477.1	protein phosphatase inhibitor
UV8b_5863	JHTR01000033.1	163502	164756	+	2109.8	1254	36	KDB13273.1	hypothetical protein UV8b_5863
UV8b_2985	JHTR01000012.1	230479	231275	+	1106.2	796	356	KDB16055.1	arginyl-tRNA synthetase
UV8b_5686	JHTR01000031.1	406816	407729	+	948.5	913	454	KDB13588.1	putative splicing factor 3a subunit 2
UV8b_7651	JHTR01000067.1	89532	90409	+	1203.2	877	208	KDB11506.1	ATP-binding cassette sub-family F member 2
UV8b_5804	JHTR01000032.1	349979	352498	+	3822.9	2519	-402	KDB13425.1	ATP synthase gamma chain precursor
UV8b_4850	JHTR01000024.1	221224	221849	+	1074.9	625	336	KDB14255.1	fumarylacetoacetate hydrolase
UV8b_6595	JHTR01000042.1	149221	149973	+	1148.6	752	-84	KDB12574.1	putative GPI transamidase component PIG-S
UV8b_383	JHTR01000001.1	1613660	1614798	+	1655.4	1138	487	KDB18992.1	hypothetical protein UV8b_383
UV8b_316	JHTR01000001.1	1068147	1069289	+	1285.1	1142	354	KDB18925.1	C-4 sterol methyl oxidase
UV8b_8286	JHTR01000102.1	38763	39403	+	1066.5	640	-102	KDB10882.1	putative dynein light chain (Tctex1)
UV8b_2391	JHTR01000009.1	512411	514450	+	3609.6	2039	-183	KDB16800.1	phosphoprotein phosphatase
UV8b_1227	JHTR01000004.1	281888	283013	+	1690.7	1125	541	KDB17860.1	negative regulation of gluconeogenesis
UV8b_7157	JHTR01000053.1	83545	85626	+	3344.8	2081	72	KDB12014.1	cytochrome b2
UV8b_48	JHTR01000001.1	176215	176967	+	485.1	752	880	KDB18657.1	short chain dehydrogenase family protein
UV8b_2808	JHTR01000011.1	394508	396684	+	3923.4	2176	732	KDB16352.1	elicitor protein
UV8b_2062	JHTR01000008.1	216537	217295	+	567.9	758	582	KDB16970.1	DNA-directed RNA polymerases II 24 kDa polypeptide
UV8b_6923	JHTR01000048.1	146494	148478	+	2645.8	1984	748	KDB12219.1	SOM1 protein
UV8b_5819	JHTR01000032.1	410175	410675	+	806.6	500	165	KDB13440.1	golgi mannosyltransferase complex subunit
UV8b_7075	JHTR01000051.1	127148	128231	+	1743.4	1083	453	KDB12082.1	putative F-box and WD40 domain protein
UV8b_3840	JHTR01000016.1	448027	449317	+	1990.5	1290	406	KDB15414.1	putative FAD synthetase
UV8b_5906	JHTR01000033.1	268519	269399	+	1228.4	880	410	KDB13316.1	ARM-like repeat-containing protein
UV8b_5211	JHTR01000028.1	167267	167767	+	701.6	500	566	KDB13877.1	putative protein wos2
UV8b_2688	JHTR01000011.1	23234	25328	+	4025	2094	1345	KDB16232.1	putative protein-tyrosine phosphatase
UV8b_2974	JHTR01000012.1	199178	199806	+	828.5	628	294	KDB16044.1	SUN domain protein (Uth1)
UV8b_3155	JHTR01000012.1	739918	740793	+	1452	875	652	KDB16225.1	ER membrane protein
UV8b_5528	JHTR01000030.1	301976	302730	+	1266.5	754	481	KDB13696.1	uracil phosphoribosyltransferase
UV8b_7556	JHTR01000065.1	77511	78517	+	1499.8	1006	316	KDB11589.1	putative glutathione S-transferase
UV8b_2528	JHTR01000010.1	64989	66230	+	1574.6	1241	309	KDB16493.1	prolipoprotein diacylglyceryl transferase
UV8b_7344	JHTR01000058.1	147429	149391	+	4125.5	1962	1048	KDB11831.1	putative alpha/beta hydrolase
UV8b_2151	JHTR01000008.1	495497	496499	+	1542.4	1002	-1952	KDB17059.1	hypothetical protein UV8b_2151
UV8b_2544	JHTR01000010.1	126291	127260	+	1384.2	969	372	KDB16509.1	ATP-dependent RNA helicase dbp-2
UV8b_1944	JHTR01000007.1	681552	684359	+	6058.4	2807	1068	KDB17347.1	C6 zinc finger domain protein
UV8b_1291	JHTR01000004.1	505326	505952	+	911.3	626	163	KDB17924.1	cwf15/cwc15 cell cycle control protein
UV8b_4328	JHTR01000020.1	245837	246898	+	1644.5	1061	819	KDB14805.1	putative oxidoreductase,short chain dehydrogenase
UV8b_969	JHTR01000003.1	415044	416574	+	2959.1	1530	539	KDB18121.1	40S ribosomal protein S19
UV8b_5977	JHTR01000034.1	282497	282997	+	790.8	500	235	KDB13217.1	mitochondrial distribution and morphology protein 38
UV8b_5944	JHTR01000034.1	173530	174635	+	1862.5	1105	554	KDB13184.1	RNP domain protein
UV8b_3543	JHTR01000015.1	152588	153590	+	1391.3	1002	493	KDB15512.1	DNAJ domain containing protein
UV8b_6492	JHTR01000041.1	128410	129799	+	2789.8	1389	637	KDB12646.1	ATP phosphoribosyltransferase
UV8b_7749	JHTR01000071.1	131988	133284	+	1802.2	1296	407	KDB11436.1	hypothetical protein UV8b_7749
UV8b_7581	JHTR01000066.1	43183	44078	+	1061.3	895	281	KDB11539.1	Ran-interacting protein Mog1
UV8b_321	JHTR01000001.1	1080170	1080670	+	630.3	500	285	KDB18930.1	flavodoxin and radical SAM domain protein
UV8b_3227	JHTR01000013.1	332729	333985	+	2331.8	1256	238	KDB15915.1	hypothetical protein UV8b_3227
UV8b_8162	JHTR01000085.1	58109	59112	+	1270.3	1003	339	KDB10987.1	fructose-bisphosphate aldolase, class II
UV8b_7759	JHTR01000072.1	14190	16522	+	4601	2332	983	KDB11366.1	hypothetical protein UV8b_7759
UV8b_7958	JHTR01000077.1	121303	123216	+	3447	1913	711	KDB11225.1	chitin synthase 1
UV8b_5921	JHTR01000034.1	79082	80253	+	2264.7	1171	390	KDB13161.1	WD domain, G-beta repeat containing protein
UV8b_2953	JHTR01000012.1	143256	145299	+	3794.4	2043	341	KDB16023.1	hypothetical protein UV8b_2953
UV8b_3614	JHTR01000015.1	348366	349876	+	2793.4	1510	850	KDB15583.1	delta-9 fatty acid desaturase
UV8b_3820	JHTR01000016.1	365980	367300	+	1769	1320	643	KDB15394.1	Eukaryotic translation initiation factor 3 subunit L
UV8b_2774	JHTR01000011.1	265170	266451	+	2113.8	1281	511	KDB16318.1	hypothetical protein UV8b_2774
UV8b_2971	JHTR01000012.1	193023	193775	+	1129.3	752	535	KDB16041.1	putative PHD finger domain protein
UV8b_2356	JHTR01000009.1	388532	390064	+	3265.3	1532	529	KDB16765.1	dimeric alpha-beta barrel
UV8b_8352	JHTR01000121.1	17965	19094	+	1637	1129	507	KDB10800.1	checkpoint kinase 2-like protein
UV8b_4486	JHTR01000021.1	178103	179367	+	1816.6	1264	352	KDB14630.1	hypothetical protein UV8b_4486
UV8b_3093	JHTR01000012.1	540760	541512	+	1164.6	752	253	KDB16163.1	putative ribosomal small subunit assembly protein
UV8b_5916	JHTR01000034.1	62496	64614	+	3686.3	2118	1855	KDB13156.1	SH3 domain-containing protein
UV8b_3694	JHTR01000015.1	590119	591026	+	1428.2	907	1015	KDB15663.1	hypothetical protein UV8b_3694
UV8b_7223	JHTR01000056.1	37229	37860	+	974	631	576	KDB11898.1	ubiquitin carboxyl-terminal hydrolase 2
UV8b_927	JHTR01000003.1	261195	262859	+	3303.9	1664	731	KDB18079.1	hypothetical protein UV8b_927
UV8b_5021	JHTR01000026.1	103982	104607	+	1116.8	625	747	KDB14032.1	C6 finger domain protein
UV8b_1474	JHTR01000005.1	347068	348069	+	1280.6	1001	498	KDB17590.1	putative aimless RasGEF (aleA)
UV8b_6401	JHTR01000040.1	128406	129294	+	853.9	888	218	KDB12745.1	mitochondrial S-adenosylmethionine transporter
UV8b_7483	JHTR01000063.1	35782	37107	+	2075.5	1325	756	KDB11626.1	phosphoenolpyruvate carboxylase kinase
UV8b_2570	JHTR01000010.1	205367	206244	+	1095.2	877	249	KDB16535.1	importin beta-3 subunit
UV8b_7000	JHTR01000049.1	133221	134111	+	1295.5	890	404	KDB12176.1	putative prohibitin PHB1
UV8b_4456	JHTR01000021.1	85314	86751	+	2392.8	1437	702	KDB14600.1	Citrate synthase precursor
UV8b_34	JHTR01000001.1	128296	130058	+	3866.9	1762	647	KDB18643.1	20S-pre-rRNA D-site endonuclease NOB1
UV8b_1653	JHTR01000005.1	913145	914871	+	2274.8	1726	-79	KDB17769.1	cenp-o kinetochore centromere component
UV8b_5711	JHTR01000032.1	49381	49881	+	353.3	500	-33	KDB13332.1	thiamin pyrophosphokinase-related protein
UV8b_4333	JHTR01000020.1	256840	257591	+	936.1	751	207	KDB14810.1	cyclophilin-type peptidyl-prolyl cis-trans isomerase
UV8b_8262	JHTR01000100.1	53337	54357	+	1394.3	1020	536	KDB10890.1	60S ribosomal protein L28
UV8b_4404	JHTR01000020.1	485593	486093	+	589.4	500	580	KDB14881.1	BEM46 family protein
UV8b_1882	JHTR01000007.1	484238	485114	+	1572	876	374	KDB17285.1	origin recognition complex subunit
UV8b_4210	JHTR01000019.1	489989	490994	+	1789.5	1005	705	KDB15064.1	putative integral membrane protein, Mpv17/PMP22 family
UV8b_5766	JHTR01000032.1	234730	235989	+	2119.3	1259	488	KDB13387.1	CCCH zinc finger and SMR domain containing protein
UV8b_6822	JHTR01000046.1	111713	112716	+	1408.9	1003	475	KDB12335.1	40S ribosomal protein S15
UV8b_3509	JHTR01000015.1	53512	55089	+	2598.2	1577	328	KDB15478.1	threonine ammonia-lyase precursor
UV8b_812	JHTR01000002.1	948901	950152	+	2516.6	1251	242	KDB18570.1	hypothetical protein UV8b_812
UV8b_874	JHTR01000003.1	100250	103205	+	6059.8	2955	1134	KDB18026.1	hypothetical protein UV8b_874
UV8b_168	JHTR01000001.1	525927	527819	+	3497.3	1892	895	KDB18777.1	putative cell wall biogenesis protein phosphatase Ssd1
UV8b_3608	JHTR01000015.1	326259	326759	+	650.8	500	236	KDB15577.1	RhoGAP domain containing protein
UV8b_5763	JHTR01000032.1	226190	227318	+	2100.7	1128	568	KDB13384.1	proline iminopeptidase
UV8b_4384	JHTR01000020.1	400739	401616	+	1317.1	877	253	KDB14861.1	RNA polymerase I specific transcription initiation factor RRN3 superfamily
UV8b_2611	JHTR01000010.1	330573	331751	+	1554.1	1178	400	KDB16576.1	casein kinase II beta subunit
UV8b_3253	JHTR01000013.1	421487	422239	+	919.4	752	164	KDB15941.1	C3 finger domain protein
UV8b_5723	JHTR01000032.1	85985	87110	+	1912.6	1125	357	KDB13344.1	hypothetical protein UV8b_5723
UV8b_2323	JHTR01000009.1	262041	263167	+	1322.5	1126	716	KDB16732.1	amino acid transporter arg-13
UV8b_2031	JHTR01000008.1	103031	103908	+	1323	877	558	KDB16939.1	sexual differentiation process protein isp4
UV8b_608	JHTR01000002.1	305037	306210	+	1410.6	1173	520	KDB18366.1	60S ribosomal protein L27
UV8b_6801	JHTR01000046.1	46039	47145	+	1165.1	1106	485	KDB12314.1	S-adenosylmethionine synthetase
UV8b_3760	JHTR01000016.1	200206	201272	+	969.5	1066	415	KDB15334.1	protein transport protein SEC13
UV8b_967	JHTR01000003.1	409056	410070	+	1678.7	1014	420	KDB18119.1	mdm10-like protein
UV8b_7319	JHTR01000058.1	57530	58540	+	1641	1010	150	KDB11806.1	Eps15-like protein pan1p
UV8b_7274	JHTR01000057.1	71911	72917	+	1275.9	1006	2698	KDB11851.1	calcium-transporting ATPase 3
UV8b_3112	JHTR01000012.1	596492	596992	+	613.4	500	-42	KDB16182.1	hypothetical protein UV8b_3112
UV8b_2686	JHTR01000011.1	16318	17195	+	1230.5	877	131	KDB16230.1	KH domain RNA-binding protein
UV8b_4323	JHTR01000020.1	231120	232004	+	1369.1	884	584	KDB14800.1	hypothetical protein UV8b_4323
UV8b_7838	JHTR01000074.1	47004	48021	+	1954.7	1017	482	KDB11309.1	hypothetical protein UV8b_7838
UV8b_1117	JHTR01000003.1	887582	889383	+	3351.2	1801	602	KDB18269.1	26S protease regulatory subunit 6B
UV8b_2330	JHTR01000009.1	278824	279576	+	1047.4	752	366	KDB16739.1	Mitochondrial thiamine pyrophosphate carrier 1
UV8b_5577	JHTR01000031.1	67560	68314	+	1154	754	435	KDB13479.1	PinX1-related protein
UV8b_1698	JHTR01000006.1	543251	544527	+	1784.3	1276	746	KDB17441.1	Eukaryotic release factor 1
UV8b_4459	JHTR01000021.1	88390	89644	+	2055.2	1254	248	KDB14603.1	mitochondrial FOW-1 like protein
UV8b_3397	JHTR01000014.1	359163	360551	+	2875.5	1388	-165	KDB15757.1	hypothetical protein UV8b_3397
UV8b_487	JHTR01000001.1	2053841	2054842	+	1476.5	1001	411	KDB19096.1	BSD domain-containing protein
UV8b_5876	JHTR01000033.1	193430	194556	+	1454.8	1126	-200	KDB13286.1	SAGA-like transcriptional regulatory complex subunit Spt3
UV8b_395	JHTR01000001.1	1645123	1646477	+	1815.9	1354	606	KDB19004.1	kinase domain containing protein
UV8b_6114	JHTR01000036.1	297744	298756	+	1601.9	1012	-2477	KDB13114.1	folylpolyglutamate synthase
UV8b_7790	JHTR01000072.1	111920	113560	+	2361.7	1640	279	KDB11397.1	d-3-phosphoglycerate dehydrogenase
UV8b_1237	JHTR01000004.1	317451	319817	+	3841.7	2366	715	KDB17870.1	hypothetical protein UV8b_1237
UV8b_3127	JHTR01000012.1	651388	656113	+	6411.5	4725	-128	KDB16197.1	hypothetical protein UV8b_3127
UV8b_5681	JHTR01000031.1	387403	388541	+	1820.3	1138	472	KDB13583.1	nuclear localization protein
UV8b_6171	JHTR01000037.1	116476	117353	+	1289.8	877	333	KDB12969.1	Transmembrane amino acid transporter family protein
UV8b_657	JHTR01000002.1	490963	491974	+	1528.3	1011	423	KDB18415.1	putative CDP-diacylglycerol--inositol 3-phosphatidyltransferase
UV8b_2872	JHTR01000011.1	562486	563777	+	2398.6	1291	323	KDB16416.1	sideroflexin-1
UV8b_6286	JHTR01000038.1	255372	256522	+	1647.6	1150	506	KDB12925.1	nucleosome assembly protein
UV8b_6070	JHTR01000036.1	143476	144479	+	1374.6	1003	122	KDB13070.1	Mediator of RNA polymerase II transcription subunit 19
UV8b_2158	JHTR01000008.1	525351	526786	+	2298.8	1435	473	KDB17066.1	peroxisome targeting signal type 2 receptor
UV8b_8350	JHTR01000121.1	12312	13268	+	1208.1	956	1639	KDB10798.1	hypothetical protein UV8b_8350
UV8b_8273	JHTR01000102.1	15382	17211	+	3533.8	1829	709	KDB10869.1	Adaptor complexes medium subunit family protein
UV8b_7026	JHTR01000050.1	111309	111934	+	1684.3	625	486	KDB12123.1	putative esterase
UV8b_7799	JHTR01000073.1	31487	32492	+	1629.5	1005	330	KDB11337.1	DUF455 domain protein
UV8b_555	JHTR01000002.1	164271	167400	+	4940.9	3129	1649	KDB18313.1	heat shock protein 70
UV8b_4397	JHTR01000020.1	458565	459572	+	1754.7	1007	-2762	KDB14874.1	hypothetical protein UV8b_4397
UV8b_2527	JHTR01000010.1	56676	57825	+	1877.3	1149	521	KDB16492.1	putative C6 transcription factor
UV8b_17	JHTR01000001.1	69855	70730	+	1201.6	875	285	KDB18626.1	putative glycine cleavage system H protein
UV8b_4843	JHTR01000024.1	199007	199784	+	1034.2	777	1019	KDB14248.1	glycosyl hydrolase family 47 protein
UV8b_5098	JHTR01000026.1	356937	358334	+	2519.2	1397	596	KDB14109.1	lipoic acid synthetase precursor
UV8b_899	JHTR01000003.1	182229	183108	+	1248.2	879	823	KDB18051.1	ATPase components of ABC transporter
UV8b_8156	JHTR01000083.1	114901	115401	+	752.7	500	8788	KDB11028.1	beige/BEACH domain protein
UV8b_2814	JHTR01000011.1	410314	414306	+	5920.7	3992	-901	KDB16358.1	50S ribosomal subunit L30
UV8b_6333	JHTR01000039.1	230442	230942	+	738.8	500	233	KDB12839.1	proteasome regulatory particle, non-ATPase-like protein
UV8b_5754	JHTR01000032.1	191959	193090	+	1541.2	1131	335	KDB13375.1	mitochondrial targeting protein (Mas1)
UV8b_4729	JHTR01000023.1	354417	356781	+	6866.7	2364	1165	KDB14458.1	bifunctional purine biosynthesis protein
UV8b_4093	JHTR01000019.1	109763	111020	+	2062.3	1257	212	KDB14947.1	MSF1 domain-containing protein
UV8b_3693	JHTR01000015.1	586901	588578	+	3772.7	1677	673	KDB15662.1	cyclin-dependent kinase
UV8b_4100	JHTR01000019.1	143244	144633	+	2497.3	1389	516	KDB14954.1	ATG5 protein
UV8b_3298	JHTR01000013.1	567329	567829	+	504.9	500	59	KDB15986.1	lysophospholipase precursor
UV8b_455	JHTR01000001.1	1962475	1963985	+	2446.2	1510	173	KDB19064.1	acetylornithine aminotransferase precursor
UV8b_7920	JHTR01000076.1	42484	44002	+	2150.3	1518	374	KDB11245.1	C-type cyclin
UV8b_1892	JHTR01000007.1	525477	526979	+	2164	1502	438	KDB17295.1	RING finger protein (Zin)
UV8b_843	JHTR01000002.1	1041592	1042607	+	1398.8	1015	265	KDB18601.1	cytochrome c heme lyase
UV8b_3844	JHTR01000016.1	458132	458887	+	1270.3	755	-72	KDB15418.1	increased rDNA silencing protein 4
UV8b_6307	JHTR01000039.1	63295	64070	+	1203.7	775	1295	KDB12813.1	hypothetical protein UV8b_6307
UV8b_4878	JHTR01000024.1	323432	323932	+	811.6	500	415	KDB14283.1	aminotransferase family protein (LolT)
UV8b_4847	JHTR01000024.1	212443	212943	+	724.2	500	499	KDB14252.1	GPI-anchored cell wall beta-1,3-endoglucanase EglC
UV8b_5742	JHTR01000032.1	158650	161853	+	5252.3	3203	705	KDB13363.1	HMG box protein
UV8b_5454	JHTR01000030.1	91274	92276	+	1526.8	1002	291	KDB13622.1	metal homeostatis protein bsd2
UV8b_5344	JHTR01000029.1	117311	118065	+	1055.4	754	141	KDB13737.1	26S protease regulatory subunit 7
UV8b_3488	JHTR01000015.1	9575	10494	+	1280.4	919	326	KDB15457.1	Ras family GTPase
UV8b_5919	JHTR01000034.1	71821	73346	+	2518.7	1525	617	KDB13159.1	ATP-dependent RNA helicase DED1
UV8b_4597	JHTR01000022.1	434953	435966	+	1353.4	1013	437	KDB14547.1	putative phospholipid-transporting ATPase
UV8b_5733	JHTR01000032.1	114257	117236	+	5657.8	2979	434	KDB13354.1	Mis12-Mtw1 family protein
UV8b_2940	JHTR01000012.1	109732	110736	+	1456.7	1004	336	KDB16010.1	glutamate carboxypeptidase
UV8b_2647	JHTR01000010.1	506136	506886	+	1135.4	750	319	KDB16612.1	putative chromosome segregation protein Cse1
UV8b_1558	JHTR01000005.1	619927	621869	+	3542.8	1942	408	KDB17674.1	serine/threonine kinase IREI
UV8b_5791	JHTR01000032.1	299515	300391	+	1168.1	876	102	KDB13412.1	putative tRNA dihydrouridine synthase (Smm1)
UV8b_6517	JHTR01000041.1	200918	201919	+	1408	1001	1226	KDB12671.1	C-1-tetrahydrofolate synthase
UV8b_7601	JHTR01000066.1	85196	86449	+	1948.1	1253	362	KDB11559.1	ADP-ribosylation factor-like protein 1
UV8b_7063	JHTR01000051.1	97485	98766	+	2428.3	1281	150	KDB12070.1	reticulocyte-binding protein 2 like protein A
UV8b_7174	JHTR01000054.1	58932	59682	+	1123.4	750	-931	KDB11945.1	hypothetical protein UV8b_7174
UV8b_3056	JHTR01000012.1	430698	432907	+	3163.4	2209	1070	KDB16126.1	transketolase
UV8b_8219	JHTR01000092.1	33520	34400	+	1252.6	880	294	KDB10925.1	delta-aminolevulinic acid dehydratase
UV8b_401	JHTR01000001.1	1665507	1669299	+	5348.8	3792	1701	KDB19010.1	putative eukaryotic translation initiation factor subunit eIF-4F
UV8b_4090	JHTR01000019.1	104285	105295	+	1446.8	1010	555	KDB14944.1	capsule polysaccharide biosynthesis protein
UV8b_3801	JHTR01000016.1	322130	323309	+	1815.6	1179	399	KDB15375.1	ubiquitin-conjugating enzyme h
UV8b_1589	JHTR01000005.1	714662	715537	+	1024.6	875	246	KDB17705.1	Complex I intermediate-associated protein 30
UV8b_2589	JHTR01000010.1	261186	262581	+	2290.1	1395	99	KDB16554.1	plasma membrane phosphatase required for sodium stress response
UV8b_5642	JHTR01000031.1	264403	265029	+	856.3	626	1809	KDB13544.1	adenylate cyclase, ACY
UV8b_1043	JHTR01000003.1	650381	653113	+	4967.2	2732	614	KDB18195.1	PHD-finger & SET domain containing protein
UV8b_2408	JHTR01000009.1	557676	558694	+	1373.4	1018	445	KDB16817.1	cell division control protein 12
UV8b_1744	JHTR01000007.1	999	1499	+	730.8	500	393	KDB17147.1	hypothetical protein UV8b_1744
UV8b_5629	JHTR01000031.1	214448	216644	+	4104.8	2196	848	KDB13531.1	exo-beta-1,3-glucanase
UV8b_5458	JHTR01000030.1	103022	105576	+	4071.4	2554	1958	KDB13626.1	NmrA family transcriptional regulator
UV8b_6547	JHTR01000042.1	1960	2965	+	1586.2	1005	154	KDB12526.1	cell cycle control protein
UV8b_2465	JHTR01000009.1	745003	745762	+	1094	759	337	KDB16874.1	Protein required for hyphal anastomosis (HAM-2)
UV8b_4211	JHTR01000019.1	491909	492659	+	1135.9	750	397	KDB15065.1	Phosphoglycerate kinase
UV8b_5658	JHTR01000031.1	309550	310805	+	1556.7	1255	594	KDB13560.1	DUF962 domain-containing protein
UV8b_793	JHTR01000002.1	895679	896561	+	1205.8	882	-476	KDB18551.1	methionine vitamin-b12
UV8b_4264	JHTR01000020.1	70719	71849	+	1560	1130	425	KDB14741.1	40S ribosomal protein S27
UV8b_4659	JHTR01000023.1	147284	148054	+	944.5	770	320	KDB14388.1	putative U6 snRNA-associated protein LSm7
UV8b_1177	JHTR01000004.1	80954	84277	+	4296.9	3323	400	KDB17810.1	DUF1640-domain-containing protein
UV8b_4414	JHTR01000020.1	515761	517011	+	2292.5	1250	60	KDB14891.1	small nuclear ribonucleoprotein Sm D1
UV8b_5695	JHTR01000031.1	444870	445370	+	766.4	500	1023	KDB13597.1	glutaredoxin domain-containing protein
UV8b_6623	JHTR01000042.1	242896	244029	+	1772.6	1133	723	KDB12602.1	D-3-phosphoglycerate dehydrogenase 1
UV8b_511	JHTR01000001.1	2203533	2205461	+	2063	1928	-152	KDB19120.1	cyclophilin-like peptidylprolyl cis- trans isomerase
UV8b_994	JHTR01000003.1	507969	509094	+	1959.2	1125	2423	KDB18146.1	putative methyltransferase LaeA-like
UV8b_5749	JHTR01000032.1	178574	179705	+	2042.8	1131	422	KDB13370.1	DnaJ domain or J-domain containing protein
UV8b_4166	JHTR01000019.1	346575	347454	+	1307	879	254	KDB15020.1	putative RNA binding protein Rnp24
UV8b_5855	JHTR01000033.1	142563	143697	+	1772.6	1134	336	KDB13265.1	37S ribosomal protein S12
UV8b_3592	JHTR01000015.1	279120	279999	+	1108.6	879	553	KDB15561.1	chaperonin
UV8b_3404	JHTR01000014.1	392306	393193	+	1459.8	887	73	KDB15764.1	transcription factor IWS1
UV8b_1916	JHTR01000007.1	602630	604055	+	2407.1	1425	503	KDB17319.1	lysyl-tRNA synthetase
UV8b_1769	JHTR01000007.1	73055	74811	+	4105.5	1756	756	KDB17172.1	fumarate hydratase precursor
UV8b_8170	JHTR01000085.1	91896	92771	+	1105.8	875	509	KDB10995.1	VPS9 domain protein
UV8b_5776	JHTR01000032.1	258451	260385	+	2919.8	1934	325	KDB13397.1	TH14-3-3 like protein
UV8b_3027	JHTR01000012.1	348446	350326	+	3658.1	1880	103	KDB16097.1	TATA binding protein
UV8b_1834	JHTR01000007.1	307175	308648	+	2118.1	1473	625	KDB17237.1	putative transcriptional regulator (Cti6)
UV8b_6602	JHTR01000042.1	168907	169614	+	1095.6	707	18	KDB12581.1	putative mRNA capping nucleoside-triphosphatase
UV8b_1779	JHTR01000007.1	109291	110106	+	949.9	815	335	KDB17182.1	putative transcription factor BTF3a
UV8b_5973	JHTR01000034.1	269351	271914	+	3872.8	2563	1338	KDB13213.1	putative calcium/calmodulin-dependent protein kinase
UV8b_5783	JHTR01000032.1	274729	275867	+	2042.8	1138	246	KDB13404.1	mannan polymerase complexes MNN9 subunit
UV8b_7991	JHTR01000078.1	97350	99426	+	3423.9	2076	782	KDB11180.1	putative C2H2 finger domain protein
UV8b_4124	JHTR01000019.1	221574	222324	+	1149.5	750	268	KDB14978.1	Leukotriene A-4 hydrolase
UV8b_688	JHTR01000002.1	579540	581392	+	2463.8	1852	710	KDB18446.1	ubiquitin supergroup
UV8b_3357	JHTR01000014.1	235067	235827	+	1071.2	760	194	KDB15717.1	putative ubiquitin conjugating enzyme (UbcK)
UV8b_3642	JHTR01000015.1	436863	438127	+	2134.6	1264	838	KDB15611.1	N-acetylglucosaminidase
UV8b_4691	JHTR01000023.1	236275	238407	+	3139.6	2132	636	KDB14420.1	putative R3H domain protein
UV8b_2811	JHTR01000011.1	406334	407336	+	1445.9	1002	594	KDB16355.1	60S ribosomal protein L37a
UV8b_882	JHTR01000003.1	130998	131755	+	1175.7	757	381	KDB18034.1	putative calcium P-type ATPase
UV8b_1185	JHTR01000004.1	99045	99923	+	766.4	878	174	KDB17818.1	succinate dehydrogenase iron-sulfur protein precursor
UV8b_8009	JHTR01000079.1	103456	104332	+	1513.2	876	347	KDB11147.1	RNAse iii domain-containing protein
UV8b_3485	JHTR01000015.1	1160	1785	+	1054.7	625	356	KDB15454.1	hypothetical protein UV8b_3485
UV8b_4508	JHTR01000021.1	247402	248837	+	2459.6	1435	443	KDB14652.1	hypothetical protein UV8b_4508
UV8b_4287	JHTR01000020.1	124095	126415	+	3978.7	2320	1069	KDB14764.1	hypothetical protein UV8b_4287
UV8b_1912	JHTR01000007.1	591167	592048	+	1179.7	881	69	KDB17315.1	putative UBX domain protein (Ubx5)
UV8b_2576	JHTR01000010.1	228019	228895	+	1168.6	876	443	KDB16541.1	methionine aminopeptidase 1
UV8b_5705	JHTR01000032.1	19861	21362	+	2376.5	1501	347	KDB13326.1	Sec7 domain-containing protein
UV8b_3714	JHTR01000016.1	39800	42516	+	5158.3	2716	1186	KDB15288.1	hypothetical protein UV8b_3714
UV8b_328	JHTR01000001.1	1099925	1101809	+	3479.5	1884	1150	KDB18937.1	putative gamma interferon inducible lysosomal thiol reductase (GILT)
UV8b_5813	JHTR01000032.1	388011	388797	+	738.8	786	199	KDB13434.1	FYVE zinc finger protein
UV8b_3789	JHTR01000016.1	294254	295132	+	1179.9	878	525	KDB15363.1	stomatin family protein
UV8b_5625	JHTR01000031.1	199312	200063	+	1276.6	751	429	KDB13527.1	HIT zinc finger family protein
UV8b_790	JHTR01000002.1	890903	892157	+	2276.7	1254	80	KDB18548.1	pathogenicity protein
UV8b_6345	JHTR01000039.1	266202	266827	+	917.2	625	276	KDB12851.1	coatamer subunit protein
UV8b_6104	JHTR01000036.1	263469	266355	+	4459.8	2886	1513	KDB13104.1	actin
UV8b_2906	JHTR01000011.1	656916	658307	+	2044.4	1391	759	KDB16450.1	40S ribosomal protein S7
UV8b_4607	JHTR01000022.1	491036	493083	+	3700	2047	974	KDB14557.1	putative UV excision repair protein (RadW)
UV8b_5124	JHTR01000026.1	436028	437162	+	1915.7	1134	421	KDB14135.1	ectonucleotide pyrophosphatase/phosphodiesterase family member 1
UV8b_4469	JHTR01000021.1	126487	127751	+	2343.3	1264	297	KDB14613.1	hypothetical protein UV8b_4469
UV8b_3058	JHTR01000012.1	437524	438649	+	2081.4	1125	222	KDB16128.1	extensin
UV8b_1982	JHTR01000007.1	818860	819360	+	705.6	500	541	KDB17385.1	uv-damaged DNA-binding protein
UV8b_4059	JHTR01000019.1	13818	14623	+	1161.1	805	391	KDB14913.1	NIF domain protein
UV8b_1963	JHTR01000007.1	764158	765317	+	1827.4	1159	2071	KDB17366.1	hypothetical protein UV8b_1963
UV8b_2483	JHTR01000009.1	801335	803592	+	3542.1	2257	854	KDB16892.1	RNP domain protein
UV8b_1922	JHTR01000007.1	615810	617910	+	2608.6	2100	-62	KDB17325.1	Tyrosyl-tRNA synthetase
UV8b_5569	JHTR01000031.1	46204	47596	+	1851.6	1392	499	KDB13471.1	putative PWI domain mRNA processing protein
UV8b_1123	JHTR01000003.1	909501	910506	+	1910.3	1005	394	KDB18275.1	DASH subunit SPC34
UV8b_1212	JHTR01000004.1	251671	252853	+	1830.9	1182	544	KDB17845.1	INSIG domain-containing protein
UV8b_7860	JHTR01000075.1	599	1602	+	1566.6	1003	189	KDB11250.1	AIG2 family protein
UV8b_1300	JHTR01000004.1	534558	535442	+	1308.7	884	380	KDB17933.1	ribosome biogenesis protein Kri1
UV8b_47	JHTR01000001.1	169951	170827	+	1058.9	876	275	KDB18656.1	DNA-directed RNA polymerase III
UV8b_6178	JHTR01000037.1	135606	136973	+	1674.4	1367	946	KDB12976.1	golgi matrix protein
UV8b_3446	JHTR01000014.1	512148	512786	+	817.7	638	434	KDB15806.1	wall-associated proteinase precursor
UV8b_3914	JHTR01000017.1	550334	550960	+	855.1	626	249	KDB15251.1	putative guanyl-nucleotide exchange factor (Sec7)
UV8b_841	JHTR01000002.1	1036229	1037280	+	1662.4	1051	805	KDB18599.1	hypothetical protein UV8b_841
UV8b_4887	JHTR01000024.1	363863	364488	+	981	625	1544	KDB14292.1	hypothetical protein UV8b_4887
UV8b_7015	JHTR01000049.1	190363	191244	+	1327.7	881	292	KDB12191.1	putative 37S ribosomal protein S18
UV8b_2980	JHTR01000012.1	218605	219233	+	784.5	628	-78	KDB16050.1	putative enolase
UV8b_2984	JHTR01000012.1	227387	229015	+	3210.2	1628	711	KDB16054.1	putative eukaryotic translation initiation factor 3 subunit EifCj
UV8b_2396	JHTR01000009.1	528519	529521	+	1517.7	1002	-352	KDB16805.1	calcineurin regulatory subunit B
UV8b_6983	JHTR01000049.1	73382	75635	+	2827.7	2253	941	KDB12159.1	ribosomal protein ymr-31
UV8b_137	JHTR01000001.1	437217	439279	+	2880	2062	36	KDB18746.1	splicing factor 3A subunit 3
UV8b_6793	JHTR01000046.1	24186	24686	+	689.2	500	185	KDB12306.1	ATP synthase subunit E
UV8b_2259	JHTR01000009.1	62840	63590	+	1077.5	750	362	KDB16668.1	hypothetical protein UV8b_2259
UV8b_1508	JHTR01000005.1	481747	482247	+	604.9	500	407	KDB17624.1	40S ribosomal protein S14 (CRP2)
UV8b_185	JHTR01000001.1	605968	606969	+	1764.3	1001	84	KDB18794.1	putative cell division control protein CDC23
UV8b_7577	JHTR01000066.1	17047	17924	+	1143.9	877	135	KDB11535.1	ribosomal protein s17
UV8b_3514	JHTR01000015.1	65132	67463	+	3703.5	2331	-197	KDB15483.1	putative ribosome assembly protein Noc2
UV8b_1830	JHTR01000007.1	292635	294430	+	3361.1	1795	985	KDB17233.1	hypothetical protein UV8b_1830
UV8b_7456	JHTR01000061.1	173675	174552	+	1254	877	370	KDB11747.1	Dihydrofolate reductase
UV8b_3136	JHTR01000012.1	678340	679603	+	2283.1	1263	203	KDB16206.1	ring-15 protein
UV8b_4790	JHTR01000023.1	529380	530382	+	1496	1002	59	KDB14519.1	putative RSC complex subunit Sfh1
UV8b_714	JHTR01000002.1	638630	639633	+	1257.1	1003	443	KDB18472.1	40s ribosomal protein S10b
UV8b_3931	JHTR01000017.1	600798	601298	+	516.4	500	245	KDB15268.1	putative acyltransferase
UV8b_2318	JHTR01000009.1	249098	249859	+	1248.2	761	329	KDB16727.1	putative chaperone
UV8b_5498	JHTR01000030.1	224041	226240	+	4063.2	2199	797	KDB13666.1	putative trehalose-6-phosphate synthase/trehalose phosphatase
UV8b_1255	JHTR01000004.1	383459	384084	+	995.1	625	-22	KDB17888.1	putative Rho GTPase activator (Sac7)
UV8b_3435	JHTR01000014.1	482859	483861	+	1327.7	1002	361	KDB15795.1	putative histidine kinase M232p
UV8b_24	JHTR01000001.1	92770	93907	+	1657	1137	339	KDB18633.1	formyltetrahydrofolate deformylase
UV8b_3165	JHTR01000013.1	122221	122721	+	718.8	500	-1261	KDB15853.1	dihydroorotate reductase PyrE
UV8b_4601	JHTR01000022.1	445807	449759	+	7055.4	3952	1905	KDB14551.1	von willebrand factor type A domain-containing protein
UV8b_8155	JHTR01000083.1	101660	103597	+	3389.3	1937	860	KDB11027.1	subtilisin-like serine protease PR1H
UV8b_6326	JHTR01000039.1	210319	210819	+	564.9	500	-1422	KDB12832.1	hypothetical protein UV8b_6326
UV8b_1837	JHTR01000007.1	317562	318062	+	769.4	500	242	KDB17240.1	Trans-2-enoyl-CoA reductase
UV8b_3051	JHTR01000012.1	421345	421845	+	499.2	500	189	KDB16121.1	diphosphomevalonate decarboxylase
UV8b_7543	JHTR01000064.1	158863	159738	+	1090.5	875	418	KDB11620.1	Exocyst complex protein EXO70
UV8b_7955	JHTR01000077.1	114595	116053	+	2832	1458	245	KDB11222.1	putative acetohydroxy-acid isomeroreductase
UV8b_3946	JHTR01000018.1	132038	132538	+	755.1	500	558	KDB15106.1	histidyl-tRNA synthetase precursor
UV8b_278	JHTR01000001.1	863544	864044	+	640.9	500	253	KDB18887.1	Dynein heavy chain, cytoplasmic
UV8b_860	JHTR01000003.1	60901	63317	+	4855	2416	1097	KDB18012.1	ste20-like protein
UV8b_297	JHTR01000001.1	1010638	1011278	+	1055.4	640	543	KDB18906.1	pyridoxamine 5\\'-phosphate oxidase
UV8b_7953	JHTR01000077.1	110287	112306	+	3401.6	2019	925	KDB11220.1	putative MFS multidrug resistance transporter
UV8b_2830	JHTR01000011.1	458599	460112	+	3138.4	1513	369	KDB16374.1	3-isopropylmalate dehydrogenase Leu2A
UV8b_2629	JHTR01000010.1	408110	410642	+	4511.3	2532	1266	KDB16594.1	putative protein phosphatase regulatory subunit Gac1
UV8b_4907	JHTR01000024.1	427909	429168	+	2442.4	1259	1869	KDB14312.1	C6 zinc finger domain containing protein
UV8b_700	JHTR01000002.1	605666	607078	+	2296.3	1412	606	KDB18458.1	glyceraldehyde-3-phosphate dehydrogenase
UV8b_5131	JHTR01000026.1	462742	464455	+	2572.3	1713	874	KDB14142.1	2-isopropylmalate synthase
UV8b_2063	JHTR01000008.1	218630	219788	+	1862.9	1158	514	KDB16971.1	putative nuclear segregation protein (Bfr1)
UV8b_8118	JHTR01000082.1	100359	101132	+	1105.1	773	261	KDB11054.1	UTP-glucose-1-phosphate uridylyltransferase
UV8b_6567	JHTR01000042.1	43235	44274	+	1501.4	1039	476	KDB12546.1	cell wall glucanase (Utr2)
UV8b_1273	JHTR01000004.1	425232	425983	+	1274.1	751	336	KDB17906.1	hypothetical protein UV8b_1273
UV8b_5570	JHTR01000031.1	50627	51252	+	986.9	625	378	KDB13472.1	putative PWI domain mRNA processing protein
UV8b_4044	JHTR01000018.1	492748	493753	+	1850.9	1005	734	KDB15204.1	acylase ACY 1
UV8b_7755	JHTR01000071.1	148288	149416	+	1680.1	1128	357	KDB11442.1	tol related protein
UV8b_5854	JHTR01000033.1	140696	141451	+	1140.4	755	320	KDB13264.1	alpha-1,2 mannosyltransferase KTR1
UV8b_3407	JHTR01000014.1	399296	401237	+	3252.1	1941	3364	KDB15767.1	hypothetical protein UV8b_3407
UV8b_2231	JHTR01000008.1	803090	804010	+	1399.7	920	-1345	KDB17139.1	hypothetical protein UV8b_2231
UV8b_6251	JHTR01000038.1	74457	74957	+	757.2	500	355	KDB12890.1	allantoin catabolism protein
UV8b_6457	JHTR01000041.1	10113	11274	+	1789.3	1161	892	KDB12611.1	arrestin
UV8b_5274	JHTR01000028.1	338373	339003	+	822.8	630	519	KDB13940.1	phospho-2-dehydro-3-deoxyheptonate aldolase
UV8b_2437	JHTR01000009.1	648113	650713	+	5520.3	2600	233	KDB16846.1	putative C6 finger domain protein
UV8b_6696	JHTR01000044.1	164258	165011	+	1082.7	753	259	KDB12472.1	putative ribosomal elongation factor EF-2
UV8b_5314	JHTR01000028.1	457414	458166	+	595	752	24	KDB13980.1	tetratricopeptide repeat domain containing protein
UV8b_7296	JHTR01000057.1	158929	159810	+	1238.3	881	196	KDB11873.1	hypothetical protein UV8b_7296
UV8b_7718	JHTR01000071.1	32681	33181	+	272.8	500	541	KDB11405.1	ssDNA binding protein
UV8b_8237	JHTR01000093.1	43111	44416	+	1986.5	1305	575	KDB10915.1	survival factor 1
UV8b_7053	JHTR01000051.1	68273	69655	+	2321.7	1382	404	KDB12060.1	hypothetical protein UV8b_7053
UV8b_2443	JHTR01000009.1	669833	670970	+	1652.3	1137	927	KDB16852.1	importin alpha subunit
UV8b_1835	JHTR01000007.1	310247	311122	+	1683.4	875	370	KDB17238.1	mitochondrial GTPase
UV8b_855	JHTR01000003.1	43687	44314	+	817.4	627	662	KDB18007.1	WW-domain ligand protein
UV8b_623	JHTR01000002.1	371922	373300	+	2565.5	1378	128	KDB18381.1	DUF1168 domain protein
UV8b_5888	JHTR01000033.1	221837	223089	+	2255.3	1252	384	KDB13298.1	putative ATP-dependent RNA helicase DBP7
UV8b_4779	JHTR01000023.1	512583	513083	+	652.9	500	350	KDB14508.1	hypothetical protein UV8b_4779
UV8b_540	JHTR01000001.1	2290038	2291163	+	1985.8	1125	288	KDB19149.1	putative DEAD box ATP-dependent RNA helicase
UV8b_7721	JHTR01000071.1	43418	44563	+	2019.7	1145	556	KDB11408.1	5-aminolevulinate synthase precursor
UV8b_2012	JHTR01000008.1	49220	49971	+	926.9	751	198	KDB16920.1	putative palmitoyl-protein thioesterase precursor
UV8b_7725	JHTR01000071.1	53537	54037	+	684.5	500	234	KDB11412.1	phosphoribosylformimino-5-aminoimidazole carboxamide ribotide isomerase
UV8b_5403	JHTR01000029.1	367916	369565	+	2637.1	1649	464	KDB13796.1	Frequency clock protein
UV8b_7908	JHTR01000076.1	9415	10798	+	2253.7	1383	392	KDB11233.1	SH3 domain protein
UV8b_1118	JHTR01000003.1	891269	892270	+	1412.4	1001	540	KDB18270.1	hypothetical protein UV8b_1118
UV8b_4110	JHTR01000019.1	178768	180021	+	1710.2	1253	233	KDB14964.1	AN1-type zinc finger protein
UV8b_7091	JHTR01000051.1	168794	170434	+	3453.8	1640	701	KDB12098.1	glycosyl transferase family protein
UV8b_3120	JHTR01000012.1	620350	621266	+	1335.7	916	848	KDB16190.1	serine hydroxymethyltransferase precursor
UV8b_4528	JHTR01000021.1	301852	302767	+	1396.2	915	263	KDB14672.1	hypothetical protein UV8b_4528
UV8b_1069	JHTR01000003.1	733986	734989	+	1482.8	1003	283	KDB18221.1	putative chromatin modifying protein 1b
UV8b_2482	JHTR01000009.1	799910	800535	+	1081.5	625	667	KDB16891.1	hypothetical protein UV8b_2482
UV8b_4214	JHTR01000019.1	497908	498916	+	1476	1008	147	KDB15068.1	myo-inositol-phosphate synthase
UV8b_6148	JHTR01000037.1	54858	56611	+	3373.5	1753	1720	KDB12946.1	APSES transcription factor
UV8b_767	JHTR01000002.1	807944	809030	+	1712.8	1086	286	KDB18525.1	hypothetical protein UV8b_767
UV8b_4352	JHTR01000020.1	306196	307324	+	1656.1	1128	228	KDB14829.1	hypothetical protein UV8b_4352
UV8b_2957	JHTR01000012.1	154064	155069	+	1585.2	1005	354	KDB16027.1	cysteine desulfurase precursor
UV8b_7975	JHTR01000078.1	42304	43100	+	646.6	796	564	KDB11164.1	MOZ protein represents a chromatin-associated acetyltransferase
UV8b_2649	JHTR01000010.1	519785	521415	+	3326.2	1630	42	KDB16614.1	WD domain-containing protein
UV8b_7462	JHTR01000062.1	6121	7944	+	2813.4	1823	880	KDB11676.1	putative serine/threonine protein kinase
UV8b_5790	JHTR01000032.1	296137	297142	+	1485.2	1005	717	KDB13411.1	hypothetical protein UV8b_5790
UV8b_4208	JHTR01000019.1	480742	482550	+	3538.8	1808	607	KDB15062.1	hypothetical protein UV8b_4208
UV8b_5373	JHTR01000029.1	199840	200340	+	634.3	500	691	KDB13766.1	putative serine/threonine phosphatase 2C ptc2
UV8b_3542	JHTR01000015.1	147844	149224	+	2334.4	1380	-2504	KDB15511.1	putative heme/steroid binding protein
UV8b_5734	JHTR01000032.1	117798	119931	+	4272.9	2133	1200	KDB13355.1	putative bZip transcription factor
UV8b_940	JHTR01000003.1	299268	300273	+	1322.3	1005	1111	KDB18092.1	heat shock protein 70
UV8b_1859	JHTR01000007.1	382616	383648	+	1764.6	1032	622	KDB17262.1	alpha/gamma-adaptin-binding protein p34
UV8b_7434	JHTR01000061.1	95317	95986	+	884	669	433	KDB11725.1	PXA domain protein
UV8b_3015	JHTR01000012.1	307901	308781	+	1287.5	880	470	KDB16085.1	mitochondrial outer membrane 72Kda protein
UV8b_3360	JHTR01000014.1	241728	243439	+	2329	1711	664	KDB15720.1	40S ribosomal protein S2
UV8b_4580	JHTR01000022.1	138822	139843	+	1439.3	1021	636	KDB14530.1	transformer-SR ribonucleoprotein
UV8b_1989	JHTR01000007.1	832514	833783	+	2010.8	1269	555	KDB17392.1	prolyl-tRNA synthetase
UV8b_3066	JHTR01000012.1	468173	470201	+	3713.2	2028	859	KDB16136.1	GATA-type sexual development transcription factor NsdD
UV8b_5295	JHTR01000028.1	394350	394850	+	730.6	500	500	KDB13961.1	ATP-dependent Clp protease proteolytic subunit 1
UV8b_3615	JHTR01000015.1	354597	356284	+	2335.1	1687	728	KDB15584.1	protein kinase domain-containing protein
UV8b_4608	JHTR01000022.1	494195	497203	+	4508	3008	-176	KDB14558.1	transcription factor tfiiib component
UV8b_407	JHTR01000001.1	1687634	1689742	+	3718.1	2108	1719	KDB19016.1	hypothetical protein UV8b_407
UV8b_6961	JHTR01000049.1	9592	10092	+	1027.2	500	256	KDB12137.1	SNARE complex subunit
UV8b_7343	JHTR01000058.1	145313	146565	+	2055.9	1252	481	KDB11830.1	sporulation protein
UV8b_6013	JHTR01000035.1	343973	345316	+	1879.2	1343	631	KDB13142.1	MFS multidrug transporter
UV8b_1060	JHTR01000003.1	707409	708793	+	2629.1	1384	495	KDB18212.1	aspartyl-tRNA synthetase
UV8b_2536	JHTR01000010.1	96657	97658	+	1066.7	1001	694	KDB16501.1	30S ribosomal protein S9
UV8b_5343	JHTR01000029.1	114700	116079	+	2546.2	1379	372	KDB13736.1	hypothetical protein UV8b_5343
UV8b_4525	JHTR01000021.1	295101	297119	+	2666.7	2018	1041	KDB14669.1	hypothetical protein UV8b_4525
UV8b_2004	JHTR01000007.1	886118	886876	+	1056.1	758	852	KDB17407.1	Importin-beta domain containing protein
UV8b_5080	JHTR01000026.1	301205	301972	+	424.8	767	383	KDB14091.1	putative mitotic spindle biogenesis protein Spc19
UV8b_345	JHTR01000001.1	1146421	1147666	+	1470.1	1245	44	KDB18954.1	clock controlled protein
UV8b_4098	JHTR01000019.1	140156	142203	+	3288.6	2047	-45	KDB14952.1	membrane protein
UV8b_150	JHTR01000001.1	468868	471134	+	5558	2266	992	KDB18759.1	glucan synthesis regulatory protein
UV8b_4130	JHTR01000019.1	239905	240661	+	891.8	756	388	KDB14984.1	putative membrane associated DnaJ chaperone
UV8b_1254	JHTR01000004.1	377967	379947	+	3585.6	1980	1401	KDB17887.1	mannosyltransferase
UV8b_4342	JHTR01000020.1	279503	281637	+	3700.7	2134	908	KDB14819.1	serine/threonine-protein kinase sck1
UV8b_2809	JHTR01000011.1	398198	399312	+	1612	1114	1305	KDB16353.1	PHD finger domain-containing protein
UV8b_1253	JHTR01000004.1	373199	375234	+	2587.4	2035	2093	KDB17886.1	ornithine aminotransferase
UV8b_637	JHTR01000002.1	432046	433178	+	2104.4	1132	594	KDB18395.1	perilipin-like protein
UV8b_1858	JHTR01000007.1	380753	382004	+	2444.3	1251	562	KDB17261.1	hypothetical protein UV8b_1858
UV8b_3831	JHTR01000016.1	417142	419414	+	3506.5	2272	1077	KDB15405.1	hypothetical protein UV8b_3831
UV8b_8296	JHTR01000103.1	23955	24455	+	932.5	500	806	KDB10852.1	hypothetical protein UV8b_8296
UV8b_5508	JHTR01000030.1	255868	257122	+	2076.7	1254	467	KDB13676.1	golgi transport complex component Cog5
UV8b_6848	JHTR01000046.1	237578	238853	+	1723.6	1275	724	KDB12361.1	RNA recognition motif containing protein
UV8b_5782	JHTR01000032.1	273474	274099	+	964.3	625	412	KDB13403.1	putative RNA binding protein
UV8b_4138	JHTR01000019.1	258498	259248	+	980.3	750	208	KDB14992.1	coatomer subunit epsilon
UV8b_4374	JHTR01000020.1	379805	380954	+	1677.5	1149	2276	KDB14851.1	putative pyroglutamyl peptidase type I
UV8b_1283	JHTR01000004.1	479611	480825	+	1916.4	1214	746	KDB17916.1	Slx5 CSlx8 protein
UV8b_6506	JHTR01000041.1	167374	168283	+	1243.7	909	1128	KDB12660.1	STF2-like protein
UV8b_1693	JHTR01000006.1	525247	525747	+	695.3	500	391	KDB17436.1	putative GPI mannosyltransferase
UV8b_505	JHTR01000001.1	2191661	2192161	+	454.3	500	392	KDB19114.1	tRNA wybutosine-synthesizing protein
UV8b_3912	JHTR01000017.1	541429	542310	+	1427.5	881	340	KDB15249.1	DNA-directed RNA polymerase iii subunit
UV8b_1845	JHTR01000007.1	342371	343633	+	2032.4	1262	466	KDB17248.1	putative cenp-B
UV8b_4947	JHTR01000024.1	525269	527148	+	3397.6	1879	295	KDB14352.1	putative restin
UV8b_2748	JHTR01000011.1	200554	201429	+	1191.9	875	389	KDB16292.1	NAD dependent epimerase
UV8b_8195	JHTR01000088.1	54704	55606	+	1625.7	902	313	KDB10962.1	hypothetical protein UV8b_8195
UV8b_7195	JHTR01000054.1	123641	124141	+	632.4	500	2112	KDB11966.1	hypothetical protein UV8b_7195
UV8b_5940	JHTR01000034.1	151870	152870	+	1667.4	1000	411	KDB13180.1	F-box and WD domain protein
UV8b_935	JHTR01000003.1	282184	283327	+	1223.7	1143	-64	KDB18087.1	Major Facilitator Superfamily protein
UV8b_1993	JHTR01000007.1	845287	845913	+	923.6	626	352	KDB17396.1	FAD binding domain containing protein
UV8b_4674	JHTR01000023.1	204128	205382	+	2215.1	1254	472	KDB14403.1	putative histone-lysine N-methyltransferase (Ash1)
UV8b_8000	JHTR01000078.1	132565	133566	+	1637.9	1001	372	KDB11189.1	hypothetical protein UV8b_8000
UV8b_5983	JHTR01000034.1	296610	302245	+	11990.6	5635	2513	KDB13223.1	HMG CoA reductase
UV8b_2069	JHTR01000008.1	250922	252323	+	2671.4	1401	1287	KDB16977.1	GNAT family protein
UV8b_4769	JHTR01000023.1	477976	478980	+	1710.9	1004	429	KDB14498.1	60S ribosomal protein L36
UV8b_447	JHTR01000001.1	1934779	1936161	+	2139.7	1382	520	KDB19056.1	putative protein-tyrosine-phosphatase
UV8b_377	JHTR01000001.1	1598084	1600801	+	3871.1	2717	1029	KDB18986.1	putative C2H2 finger domain protein
UV8b_3121	JHTR01000012.1	622963	624103	+	1756.1	1140	356	KDB16191.1	50S ribosomal protein L19e
UV8b_5228	JHTR01000028.1	205037	205537	+	741.4	500	483	KDB13894.1	heat shock protein 70-like protein
UV8b_1562	JHTR01000005.1	632292	634166	+	3382.3	1874	694	KDB17678.1	putative TBC domain protein
UV8b_3652	JHTR01000015.1	468399	469293	+	1419.3	894	406	KDB15621.1	putative glycosyl transferase
UV8b_1204	JHTR01000004.1	152157	153034	+	1368.2	877	474	KDB17837.1	phosphoethanolamine transferase class O
UV8b_6955	JHTR01000048.1	235767	236655	+	1277.3	888	362	KDB12251.1	thioesterase family protein
UV8b_7938	JHTR01000077.1	68885	69385	+	564.4	500	379	KDB11205.1	CCR4-NOT transcription complex
UV8b_7054	JHTR01000051.1	71596	72849	+	1955.4	1253	418	KDB12061.1	serine/threonine-protein kinase RIO1
UV8b_4251	JHTR01000020.1	41247	42248	+	1691.1	1001	567	KDB14728.1	NAD-dependent deacetylase sirtuin-2
UV8b_4080	JHTR01000019.1	80310	81784	+	2099.3	1474	1230	KDB14934.1	kinase-related protein
UV8b_6808	JHTR01000046.1	67221	68476	+	2093.8	1255	401	KDB12321.1	hypothetical protein UV8b_6808
UV8b_1287	JHTR01000004.1	491973	492859	+	1361.4	886	739	KDB17920.1	MYB and HSA domain protein
UV8b_3852	JHTR01000016.1	486805	488147	+	1986	1342	331	KDB15426.1	putative Fungal specific transcription factor
UV8b_6781	JHTR01000045.1	154676	156356	+	3379.7	1680	1011	KDB12418.1	hypothetical protein UV8b_6781
UV8b_7389	JHTR01000059.1	169288	170413	+	1654.9	1125	441	KDB11801.1	2-oxoglutarate-dependent ethylene succinate-forming enzyme
UV8b_2677	JHTR01000010.1	651084	652088	+	1651.1	1004	196	KDB16642.1	SAC3/GANP family protein
UV8b_2236	JHTR01000008.1	836122	837182	+	1683.1	1060	395	KDB17144.1	putative nucleoporin-interacting protein NIC96
UV8b_5363	JHTR01000029.1	170707	171833	+	1569.7	1126	481	KDB13756.1	60S ribosomal protein L10-A-like protein
UV8b_1511	JHTR01000005.1	485887	487329	+	2252.7	1442	458	KDB17627.1	eukaryotic translation initiation factor 3
UV8b_7670	JHTR01000067.1	154847	157451	+	3685.4	2604	-236	KDB11525.1	ubiquitin
UV8b_3997	JHTR01000018.1	337378	338516	+	1703.1	1138	650	KDB15157.1	ornithine decarboxylase
UV8b_4137	JHTR01000019.1	256973	257976	+	1602.4	1003	476	KDB14991.1	60S ribosomal protein L44
UV8b_3697	JHTR01000015.1	602073	602954	+	1204.4	881	1251	KDB15666.1	metacaspase CasA
UV8b_3364	JHTR01000014.1	269182	269682	+	600.2	500	-1212	KDB15724.1	DUF52 domain-containing protein
UV8b_368	JHTR01000001.1	1571875	1573016	+	1514.6	1141	395	KDB18977.1	negative regulator of the PHO system
UV8b_2967	JHTR01000012.1	185101	186103	+	1697	1002	306	KDB16037.1	putative plasma membrane SNARE protein (Sec9)
UV8b_6527	JHTR01000041.1	232075	234876	+	3572.7	2801	272	KDB12681.1	putative GTPase activating protein
UV8b_4572	JHTR01000021.1	555548	556799	+	2246.4	1251	436	KDB14716.1	casein kinase phosphoprotein PP28
UV8b_7264	JHTR01000057.1	16023	17420	+	2221.4	1397	686	KDB11841.1	coatomer beta\\' subunit
UV8b_2650	JHTR01000010.1	524178	525448	+	2012.4	1270	546	KDB16615.1	vacuolar sorting protein 1
UV8b_2279	JHTR01000009.1	126871	128031	+	1760.8	1160	41	KDB16688.1	Mediator of RNA polymerase II transcription subunit 14
UV8b_6718	JHTR01000044.1	233505	234255	+	1106.5	750	-103	KDB12494.1	hypothetical protein UV8b_6718
UV8b_6283	JHTR01000038.1	218552	220010	+	1801.3	1458	85	KDB12922.1	MYND domain protein (SamB)
UV8b_4979	JHTR01000025.1	403044	405673	+	4662.7	2629	2035	KDB14189.1	aminopeptidase 2
UV8b_5642	JHTR01000031.1	262262	263815	+	2614	1553	131	KDB13544.1	adenylate cyclase, ACY
UV8b_4965	JHTR01000025.1	368881	369381	+	911.3	500	475	KDB14175.1	protoheme IX farnesyltransferase precursor
UV8b_3710	JHTR01000016.1	33145	34020	+	1164.1	875	758	KDB15284.1	enoyl-CoA hydratase/isomerase family protein
UV8b_1569	JHTR01000005.1	661780	663256	+	2321.7	1476	461	KDB17685.1	autophagocytosis protein
UV8b_7807	JHTR01000073.1	52118	53246	+	1208.9	1128	406	KDB11345.1	nitroreductase family protein
UV8b_1111	JHTR01000003.1	871239	871864	+	805	625	1129	KDB18263.1	putative two-component response regulator SSK1p
UV8b_195	JHTR01000001.1	634657	635660	+	1372	1003	271	KDB18804.1	u4 tri-snRNP-associated protein 3
UV8b_6284	JHTR01000038.1	222871	223371	+	292.1	500	611	KDB12923.1	putative rRNA processing protein (Ebp2)
UV8b_1773	JHTR01000007.1	91136	91903	+	1181.1	767	757	KDB17176.1	septin
UV8b_942	JHTR01000003.1	316069	316705	+	922.4	636	890	KDB18094.1	WD domain-containing protein
UV8b_74	JHTR01000001.1	264003	265702	+	2406.2	1699	614	KDB18683.1	C6 transcription factor
UV8b_5081	JHTR01000026.1	304400	305409	+	1616	1009	298	KDB14092.1	osmosensor protein
UV8b_1828	JHTR01000007.1	284277	285958	+	3172.5	1681	487	KDB17231.1	putative D-arabinitol dehydrogenase ArbD
UV8b_3059	JHTR01000012.1	445203	448261	+	5658.7	3058	1225	KDB16129.1	ZZ type zinc finger domain-containing protein
UV8b_3138	JHTR01000012.1	685608	686483	+	1370.8	875	185	KDB16208.1	histone H1-binding protein
UV8b_3800	JHTR01000016.1	319646	321024	+	2645.1	1378	449	KDB15374.1	DUF455 domain protein
UV8b_3114	JHTR01000012.1	601246	602881	+	2720.4	1635	-31	KDB16184.1	60S ribosomal protein L18
UV8b_8068	JHTR01000081.1	60206	61776	+	1746.4	1570	1146	KDB11080.1	DUF636 domain-containing protein
UV8b_6639	JHTR01000043.1	95114	96496	+	2488.6	1382	660	KDB12514.1	40S ribosomal protein S24
UV8b_7414	JHTR01000061.1	31445	32575	+	1948.4	1130	920	KDB11705.1	cysteine synthase
UV8b_1867	JHTR01000007.1	418005	419196	+	1863.9	1191	160	KDB17270.1	Serine/threonine-protein phosphatase 2B catalytic subunit
UV8b_3055	JHTR01000012.1	428748	429880	+	1948.1	1132	431	KDB16125.1	hypothetical protein UV8b_3055
UV8b_650	JHTR01000002.1	474766	476172	+	2191	1406	1277	KDB18408.1	Heterokaryon incompatibility protein Het-C
UV8b_129	JHTR01000001.1	415996	417000	+	1649.2	1004	1532	KDB18738.1	60s ribosomal protein l38
UV8b_3718	JHTR01000016.1	56087	57361	+	2101.8	1274	599	KDB15292.1	60S ribosomal protein L22
UV8b_2766	JHTR01000011.1	246205	247207	+	1317.8	1002	1750	KDB16310.1	C2 domain containing protein
UV8b_3768	JHTR01000016.1	239285	240162	+	1575.3	877	92	KDB15342.1	hypothetical protein UV8b_3768
UV8b_4466	JHTR01000021.1	120789	123620	+	5248.5	2831	-187	KDB14610.1	hypothetical protein UV8b_4466
UV8b_576	JHTR01000002.1	218352	219639	+	1827.9	1287	379	KDB18334.1	activator 1 subunit 3
UV8b_6790	JHTR01000046.1	12291	13491	+	1553.7	1200	197	KDB12303.1	putative protein kinase
UV8b_7643	JHTR01000067.1	68489	69239	+	1068.6	750	422	KDB11498.1	proteasome regulatory particle subunit Rpt2
UV8b_8205	JHTR01000088.1	90704	91729	+	1559.3	1025	563	KDB10972.1	putative importin beta-4 subunit
UV8b_3534	JHTR01000015.1	123746	125659	+	3645.9	1913	521	KDB15503.1	PNGase family
UV8b_91	JHTR01000001.1	300402	301278	+	1296.9	876	1207	KDB18700.1	nuclear protein SNF4
UV8b_5927	JHTR01000034.1	112233	114890	+	4142.7	2657	1357	KDB13167.1	elongation factor 2
UV8b_3172	JHTR01000013.1	143499	145430	+	3088.7	1931	-283	KDB15860.1	NADH:ubiquinone oxidoreductase 10.5kD subunit
UV8b_6299	JHTR01000039.1	26399	29479	+	4662.2	3080	1482	KDB12805.1	autophagy protein Atg13
UV8b_3390	JHTR01000014.1	336277	338109	+	3201.3	1832	940	KDB15750.1	hypothetical protein UV8b_3390
UV8b_2516	JHTR01000010.1	23610	24361	+	558.1	751	52	KDB16481.1	MAPKKK cascade protein kinase regulator Ste50
UV8b_8007	JHTR01000079.1	96742	97493	+	1018.9	751	525	KDB11145.1	ankyrin repeat protein
UV8b_2910	JHTR01000011.1	668457	669272	+	625.8	815	592	KDB16454.1	UPF0052 domain protein
UV8b_6966	JHTR01000049.1	31193	31944	+	700	751	270	KDB12142.1	putative adenylate kinase (ATP-AMP transphosphorylase)
UV8b_5732	JHTR01000032.1	110983	113754	+	3030.4	2771	-96	KDB13353.1	TPR repeat protein
UV8b_3076	JHTR01000012.1	504933	506950	+	2864.2	2017	956	KDB16146.1	phytanoyl-CoA dioxygenase family protein
UV8b_371	JHTR01000001.1	1579366	1580243	+	1368.9	877	305	KDB18980.1	esterase
UV8b_317	JHTR01000001.1	1071059	1072201	+	1679.4	1142	754	KDB18926.1	ATP synthase regulation protein NCA2
UV8b_2824	JHTR01000011.1	439182	441973	+	4802	2791	1145	KDB16368.1	pre-mRNA splicing factor ini1
UV8b_1437	JHTR01000005.1	236329	237673	+	2006.5	1344	-22	KDB17553.1	transporter protein smf2
UV8b_3282	JHTR01000013.1	515221	516477	+	2293.9	1256	106	KDB15970.1	C2H4 type zinc finger domain protein
UV8b_1486	JHTR01000005.1	389465	390468	+	1467.3	1003	350	KDB17602.1	hypothetical protein UV8b_1486
UV8b_7734	JHTR01000071.1	92954	93454	+	809.7	500	10	KDB11421.1	SNF2-family ATP dependent chromatin remodeling factor snf21
UV8b_5016	JHTR01000026.1	83738	85564	+	3344.8	1826	715	KDB14027.1	hypothetical protein UV8b_5016
UV8b_3337	JHTR01000014.1	160925	161820	+	1024.8	895	222	KDB15697.1	putative nucleoporin SONB
UV8b_643	JHTR01000002.1	452621	453623	+	1595.1	1002	1117	KDB18401.1	Regulatory protein cys-3
UV8b_5273	JHTR01000028.1	335778	337034	+	1865.5	1256	430	KDB13939.1	hypothetical protein UV8b_5273
UV8b_962	JHTR01000003.1	394422	395853	+	2765.8	1431	424	KDB18114.1	DUF1713 domain protein
UV8b_2142	JHTR01000008.1	461473	462599	+	1916.4	1126	372	KDB17050.1	putative TOR signaling pathway regulator (TapA)
UV8b_4299	JHTR01000020.1	174733	177174	+	4689	2441	924	KDB14776.1	putative bZIP transcription factor
UV8b_7452	JHTR01000061.1	163465	163965	+	738.6	500	297	KDB11743.1	pyruvate dehydrogenase protein x component
UV8b_6591	JHTR01000042.1	126277	129730	+	5232.5	3453	2053	KDB12570.1	DNA binding regulatory protein AmdX
UV8b_4978	JHTR01000025.1	400724	401599	+	1126.5	875	289	KDB14188.1	NmrA family transcriptional regulator
UV8b_7257	JHTR01000056.1	153070	153896	+	1148.1	826	964	KDB11932.1	putative low affinity iron transporter
UV8b_2260	JHTR01000009.1	64969	66828	+	2989.4	1859	774	KDB16669.1	succinate semialdehyde dehydrogenase
UV8b_4731	JHTR01000023.1	359944	361195	+	1545.7	1251	682	KDB14460.1	PCI domain containing protein
UV8b_4481	JHTR01000021.1	153711	154337	+	973	626	69	KDB14625.1	hypothetical protein UV8b_4481
UV8b_2728	JHTR01000011.1	151816	152817	+	1657.5	1001	386	KDB16272.1	putative snoRNP assembly factor Naf1
UV8b_775	JHTR01000002.1	832566	833323	+	887.1	757	1934	KDB18533.1	putative maintenance of ploidy protein mob1
UV8b_1920	JHTR01000007.1	610140	611551	+	2433	1411	628	KDB17323.1	deubiquitination-protection protein dph1
UV8b_3006	JHTR01000012.1	279543	281719	+	4304	2176	848	KDB16076.1	DNA binding domain with preference for A/T rich regions-like protein
UV8b_403	JHTR01000001.1	1676858	1677483	+	847.8	625	119	KDB19012.1	nuclear matrix protein
UV8b_5834	JHTR01000032.1	442527	443742	+	1752.3	1215	488	KDB13455.1	GNS1/SUR4 family protein
UV8b_5430	JHTR01000029.1	446882	447887	+	1776.6	1005	407	KDB13823.1	phenylalanyl-tRNA synthetase alpha chain
UV8b_3092	JHTR01000012.1	537838	539097	+	2270.8	1259	429	KDB16162.1	NIMA interactive protein
UV8b_5868	JHTR01000033.1	174894	176168	+	1967.9	1274	539	KDB13278.1	putative 3-hydroxyisobutyrate dehydrogenase G6G8.5
UV8b_5788	JHTR01000032.1	287105	288066	+	1271.7	961	309	KDB13409.1	putative splicing factor U2AF 23 kDa subunit
UV8b_5263	JHTR01000028.1	311448	314008	+	4596.3	2560	1067	KDB13929.1	ATP-citrate synthase subunit 1
UV8b_7376	JHTR01000059.1	99256	100516	+	2399.6	1260	547	KDB11788.1	short-chain dehydrogenase/reductase family protein
UV8b_1337	JHTR01000004.1	639176	640868	+	2757.8	1692	105	KDB17970.1	candidapepsin-4 precursor
UV8b_8148	JHTR01000083.1	79684	82139	+	4646.9	2455	606	KDB11020.1	poly RNA polymerase cid11
UV8b_1206	JHTR01000004.1	158396	159023	+	912.5	627	275	KDB17839.1	putative 60S ribosome biogenesis protein Mak11
UV8b_6273	JHTR01000038.1	165199	166454	+	2744.2	1255	397	KDB12912.1	hypothetical protein UV8b_6273
UV8b_5265	JHTR01000028.1	317421	319230	+	2958.4	1809	1003	KDB13931.1	ATP citrate lyase
UV8b_7969	JHTR01000078.1	18062	19069	+	1336.7	1007	160	KDB11158.1	U1 small nuclear ribonucleoprotein
UV8b_6813	JHTR01000046.1	84279	86427	+	3711.8	2148	931	KDB12326.1	putative MFS transporter
UV8b_6330	JHTR01000039.1	223145	224174	+	1502.8	1029	303	KDB12836.1	putative WD40 repeat protein CreC
UV8b_1158	JHTR01000004.1	30138	31552	+	2254.4	1414	521	KDB17791.1	putative ceramide glucosyltransferase
UV8b_7512	JHTR01000063.1	119869	120494	+	817	625	-271	KDB11655.1	putative HDEL sequence binding protein
UV8b_6698	JHTR01000044.1	168317	169970	+	2378.9	1653	1123	KDB12474.1	sn-1,2-diacylglycerol cholinephosphotransferase
UV8b_1872	JHTR01000007.1	466451	466951	+	781.9	500	269	KDB17275.1	putative mitochondrial fusion protein (Ugo1)
UV8b_2257	JHTR01000009.1	57569	59259	+	2508.1	1690	-114	KDB16666.1	serine/threonine-protein phosphatase PP-Z
UV8b_4982	JHTR01000025.1	410888	411388	+	696.5	500	30	KDB14192.1	putative C6 transcription factor
UV8b_1559	JHTR01000005.1	626226	627364	+	1675.4	1138	376	KDB17675.1	eukaryotic translation initiation factor 3
UV8b_1763	JHTR01000007.1	61835	62335	+	601.6	500	140	KDB17166.1	hypothetical protein UV8b_1763
UV8b_975	JHTR01000003.1	438402	438902	+	676.5	500	248	KDB18127.1	putative rRNA biogenesis protein RRP5
UV8b_6541	JHTR01000041.1	282881	283381	+	841.2	500	1544	KDB12695.1	putative budding protein BOI2
UV8b_3134	JHTR01000012.1	673111	674654	+	2660.4	1543	781	KDB16204.1	hypothetical protein UV8b_3134
UV8b_5169	JHTR01000028.1	39092	41307	+	4312.2	2215	1276	KDB13835.1	glycerol-3-phosphate O-acyltransferase
UV8b_5379	JHTR01000029.1	217997	219017	+	1575.3	1020	133	KDB13772.1	ubiquitin family protein
UV8b_3806	JHTR01000016.1	330854	331354	+	627.3	500	930	KDB15380.1	xaa-pro dipeptidase app
UV8b_7828	JHTR01000074.1	12468	13845	+	2258.4	1377	393	KDB11299.1	mitogen activated protein kinase kinase
UV8b_126	JHTR01000001.1	406899	407786	+	1451.5	887	393	KDB18735.1	ATP-dependent RNA helicase HAS1
UV8b_7989	JHTR01000078.1	93569	94069	+	374.9	500	941	KDB11178.1	PHD finger domain-containing protein
UV8b_7642	JHTR01000067.1	66523	67553	+	1663.6	1030	365	KDB11497.1	putative ubiquitin conjugating enzyme (UbcA)
UV8b_6343	JHTR01000039.1	258436	259186	+	1102.7	750	294	KDB12849.1	hypothetical protein UV8b_6343
UV8b_6051	JHTR01000036.1	90617	91369	+	1099.2	752	128	KDB13051.1	dipeptidyl aminopeptidase
UV8b_3240	JHTR01000013.1	369083	371367	+	4748.6	2284	1098	KDB15928.1	putative mitochondrial cytochrome b2
UV8b_3524	JHTR01000015.1	100296	100796	+	781.9	500	109	KDB15493.1	hypothetical protein UV8b_3524
UV8b_6741	JHTR01000045.1	48909	49796	+	1298.3	887	311	KDB12378.1	mRNA splicing factor RNA helicase
UV8b_2746	JHTR01000011.1	194427	195772	+	2087.5	1345	-392	KDB16290.1	hypothetical protein UV8b_2746
UV8b_6877	JHTR01000047.1	71968	73333	+	2319.3	1365	483	KDB12278.1	putative facilitated glucose transporter
UV8b_8139	JHTR01000083.1	44777	45277	+	548.2	500	362	KDB11011.1	hypothetical protein UV8b_8139
UV8b_2070	JHTR01000008.1	254165	254665	+	674.1	500	439	KDB16978.1	40s ribosomal protein S30
UV8b_3365	JHTR01000014.1	272934	273818	+	940.5	884	589	KDB15725.1	SNARE domain-containing protein
UV8b_7888	JHTR01000075.1	86404	87286	+	1262.3	882	609	KDB11278.1	rab proteins geranylgeranyltransferase component A
UV8b_4570	JHTR01000021.1	550194	551307	+	1547.3	1113	482	KDB14714.1	hypothetical protein UV8b_4570
UV8b_5844	JHTR01000033.1	111097	112099	+	1529.7	1002	425	KDB13254.1	Mediator of RNA polymerase II transcription subunit 12
UV8b_3645	JHTR01000015.1	443960	444835	+	1430.6	875	375	KDB15614.1	putative ubiE/COQ5 methyltransferase
UV8b_6229	JHTR01000038.1	16984	17736	+	609.6	752	208	KDB12868.1	D-galacturonic acid reductase
UV8b_526	JHTR01000001.1	2251958	2253723	+	3068.7	1765	418	KDB19135.1	zinc finger protein zpr1
UV8b_3664	JHTR01000015.1	499444	500071	+	652.9	627	173	KDB15633.1	U3 snoRNP-associated protein Utp11
UV8b_3982	JHTR01000018.1	304526	305355	+	1280.6	829	247	KDB15142.1	cullin binding protein CanA
UV8b_3670	JHTR01000015.1	517121	518248	+	1959.4	1127	577	KDB15639.1	endoplasmic oxidoreductin-1 precursor
UV8b_8311	JHTR01000104.1	11052	12462	+	2598.2	1410	264	KDB10840.1	homoserine O-acetyltransferase
UV8b_5244	JHTR01000028.1	257430	258693	+	2183	1263	531	KDB13910.1	phosphatidate cytidylyltransferase family protein
UV8b_6641	JHTR01000043.1	101205	101958	+	1022.9	753	2001	KDB12516.1	GTP cyclohydrolase-2
UV8b_473	JHTR01000001.1	2013734	2014382	+	958	648	397	KDB19082.1	putative regulator of deoxyribodipyrimidine photo-lyase PHR1
UV8b_3874	JHTR01000016.1	550696	551572	+	1288.2	876	150	KDB15448.1	putative nuclear condensin complex subunit 3
UV8b_6766	JHTR01000045.1	113805	115331	+	2129.1	1526	1309	KDB12403.1	septation
UV8b_1596	JHTR01000005.1	748043	749082	+	1760.6	1039	413	KDB17712.1	putative 5-Methylcytosine G/T mismatch-specific DNA glycosylase
UV8b_5048	JHTR01000026.1	193728	195396	+	3051.8	1668	2747	KDB14059.1	hypothetical protein UV8b_5048
UV8b_314	JHTR01000001.1	1064324	1065333	+	1669.7	1009	250	KDB18923.1	bZIP transcription factor
UV8b_5146	JHTR01000026.1	515041	515791	+	1105.1	750	-629	KDB14157.1	hypothetical protein UV8b_5146
UV8b_3722	JHTR01000016.1	74734	75681	+	1313.6	947	193	KDB15296.1	putative ATP dependent RNA helicase (Dbp5)
UV8b_262	JHTR01000001.1	802818	804450	+	3216.1	1632	446	KDB18871.1	hypothetical protein UV8b_262
UV8b_2882	JHTR01000011.1	596055	597241	+	2077.8	1186	307	KDB16426.1	peptidyl-prolyl cis/trans isomerase
UV8b_5673	JHTR01000031.1	361475	363723	+	2926.8	2248	22	KDB13575.1	hypothetical protein UV8b_5673
UV8b_4020	JHTR01000018.1	411307	412183	+	1329.8	876	236	KDB15180.1	conserved oligomeric Golgi complex subunit 2
UV8b_1280	JHTR01000004.1	461704	462204	+	761.9	500	-3795	KDB17913.1	putative mitochondrial DNA helicase (Pif1)
UV8b_409	JHTR01000001.1	1693273	1694653	+	2084.9	1380	599	KDB19018.1	putative S-adenosylmethionine-dependent methyltransferase of the seven beta-strand family
UV8b_5272	JHTR01000028.1	333916	335043	+	2003.2	1127	458	KDB13938.1	hypothetical protein UV8b_5272
UV8b_2246	JHTR01000009.1	15478	15978	+	750.4	500	308	KDB16655.1	kelch repeat protein
UV8b_2792	JHTR01000011.1	331469	332115	+	985	646	-96	KDB16336.1	hypothetical protein UV8b_2792
UV8b_3868	JHTR01000016.1	532051	533054	+	1415.3	1003	537	KDB15442.1	FACT complex subunit pob3
UV8b_7638	JHTR01000067.1	58405	59288	+	1343.3	883	-1491	KDB11493.1	histone acetyltransferase
UV8b_5958	JHTR01000034.1	218917	220391	+	2655.4	1474	550	KDB13198.1	putative cactin
UV8b_1501	JHTR01000005.1	448469	449348	+	764	879	2962	KDB17617.1	putative PHD finger domain protein
UV8b_727	JHTR01000002.1	665716	666740	+	1649.9	1024	323	KDB18485.1	acetolactate synthase small subunit precursor
UV8b_7972	JHTR01000078.1	24739	26544	+	2897.9	1805	682	KDB11161.1	NTF2 and RRM domain-containing protein
UV8b_5025	JHTR01000026.1	123300	125313	+	4056.1	2013	899	KDB14036.1	delta 1-pyrroline-5-carboxylate dehydrogenase
UV8b_652	JHTR01000002.1	479942	480570	+	625.8	628	2	KDB18410.1	hypothetical protein UV8b_652
UV8b_2616	JHTR01000010.1	344778	345656	+	1192.8	878	432	KDB16581.1	hypothetical protein UV8b_2616
UV8b_3368	JHTR01000014.1	289425	291611	+	3899.6	2186	354	KDB15728.1	hypothetical protein UV8b_3368
UV8b_4873	JHTR01000024.1	303483	304752	+	2014.1	1269	789	KDB14278.1	malate dehydrogenase precursor
UV8b_3039	JHTR01000012.1	393509	395145	+	2728.9	1636	1191	KDB16109.1	asparagine synthetase
UV8b_3941	JHTR01000018.1	116219	118958	+	4050.2	2739	632	KDB15101.1	putative ER membrane protein (Wsc4)
UV8b_4795	JHTR01000023.1	550515	551644	+	1848.4	1129	506	KDB14524.1	guanine nucleotide exchange factor Vps9
UV8b_2958	JHTR01000012.1	157192	159103	+	2791.2	1911	785	KDB16028.1	hypothetical protein UV8b_2958
UV8b_5269	JHTR01000028.1	327548	328317	+	803.1	769	286	KDB13935.1	mitochondrial import inner membrane translocase subunit TIM16
UV8b_2274	JHTR01000009.1	107152	108403	+	2329.2	1251	245	KDB16683.1	DNA-binding protein
UV8b_6118	JHTR01000036.1	311559	312184	+	886.9	625	331	KDB13118.1	40s ribosomal protein S11
UV8b_5581	JHTR01000031.1	82261	83301	+	1473.9	1040	832	KDB13483.1	DUF1750-domain-containing protein
UV8b_1495	JHTR01000005.1	434101	435227	+	2079.2	1126	201	KDB17611.1	FF domain protein
UV8b_8114	JHTR01000082.1	90456	90956	+	643	500	-3551	KDB11050.1	G-protein coupled receptor
UV8b_5769	JHTR01000032.1	240826	245552	+	6793.2	4726	2295	KDB13390.1	hypothetical protein UV8b_5769
UV8b_8264	JHTR01000100.1	56736	57741	+	1366.6	1005	346	KDB10892.1	C-5 sterol desaturase
UV8b_2278	JHTR01000009.1	121426	122391	+	1342.5	965	-2319	KDB16687.1	glucose-6-phosphate 1-dehydrogenase (G6PD)
UV8b_721	JHTR01000002.1	653340	656179	+	3959.1	2839	75	KDB18479.1	DUF726 domain-containing protein
UV8b_3341	JHTR01000014.1	169259	170260	+	1367.3	1001	452	KDB15701.1	60S ribosomal protein L8
UV8b_5396	JHTR01000029.1	346387	347658	+	1576.3	1271	695	KDB13789.1	ATP synthase protein 9 precursor (Lipid-binding protein)
UV8b_7202	JHTR01000054.1	149961	150965	+	1440.2	1004	394	KDB11973.1	putative transcription factor TFIIIC complex subunit Tfc6
UV8b_8004	JHTR01000079.1	90046	90843	+	901.9	797	59	KDB11142.1	hypothetical protein UV8b_8004
UV8b_2311	JHTR01000009.1	227977	229109	+	1589.2	1132	285	KDB16720.1	60S ribosomal protein L35
UV8b_3116	JHTR01000012.1	607675	608716	+	1857.8	1041	384	KDB16186.1	oligosaccharyl transferase subunit
UV8b_3702	JHTR01000016.1	4319	6655	+	3741.7	2336	723	KDB15276.1	vacuolar sorting-associated protein
UV8b_5029	JHTR01000026.1	135855	137555	+	2301.2	1700	-144	KDB14040.1	YmL49
UV8b_5237	JHTR01000028.1	232396	234940	+	4206.8	2544	115	KDB13903.1	40S ribosomal protein S0
UV8b_5765	JHTR01000032.1	231442	232693	+	2488.3	1251	276	KDB13386.1	TLG2-vesicle protein of 38 kDa
UV8b_1910	JHTR01000007.1	580210	580710	+	733.9	500	-1243	KDB17313.1	mRNA binding post-transcriptional regulator
UV8b_1796	JHTR01000007.1	183035	184016	+	1197.3	981	651	KDB17199.1	MADS box protein
UV8b_2585	JHTR01000010.1	250994	251744	+	1224.6	750	384	KDB16550.1	putative ribonuclease P complex subunit Pop2
UV8b_5955	JHTR01000034.1	211780	213180	+	1835.4	1400	93	KDB13195.1	hypothetical protein UV8b_5955
UV8b_4374	JHTR01000020.1	377661	378917	+	1938.5	1256	186	KDB14851.1	putative pyroglutamyl peptidase type I
UV8b_4078	JHTR01000019.1	75729	76608	+	1518.4	879	380	KDB14932.1	protein MSF1
UV8b_3031	JHTR01000012.1	365054	366330	+	2111.7	1276	433	KDB16101.1	poly(A) RNA binding protein
UV8b_1241	JHTR01000004.1	331568	332874	+	2294.4	1306	544	KDB17874.1	hypothetical protein UV8b_1241
UV8b_3657	JHTR01000015.1	480360	481392	+	1450.8	1032	610	KDB15626.1	Peroxidase/catalase
UV8b_4759	JHTR01000023.1	448915	449673	+	1156.4	758	579	KDB14488.1	OPA3 domain protein
UV8b_2002	JHTR01000007.1	874198	875431	+	1327	1233	421	KDB17405.1	putative transcription factor
UV8b_6408	JHTR01000040.1	156306	158448	+	3515	2142	609	KDB12752.1	Topoisomerase II-associated protein PAT1
UV8b_1480	JHTR01000005.1	368184	369438	+	1982.5	1254	2274	KDB17596.1	60S ribosomal protein L15
UV8b_4060	JHTR01000019.1	15409	16754	+	2116.4	1345	404	KDB14914.1	translation regulator GCD7
UV8b_5111	JHTR01000026.1	389253	391866	+	6202	2613	1092	KDB14122.1	elongation factor 3
UV8b_7380	JHTR01000059.1	119356	120107	+	1155.9	751	2536	KDB11792.1	putative COP9 signalosome subunit 2 (CsnB)
UV8b_3185	JHTR01000013.1	177462	178466	+	1692.1	1004	219	KDB15873.1	Phosphatidylinositol:UDP-GlcNAc transferase PIG-C
UV8b_665	JHTR01000002.1	514535	515450	+	1245.3	915	8	KDB18423.1	AAA family ATPase Pontin
UV8b_4336	JHTR01000020.1	264138	265389	+	1927.9	1251	730	KDB14813.1	phospho-2-dehydro-3-deoxyheptonate aldolase
UV8b_2145	JHTR01000008.1	473670	474299	+	467.4	629	606	KDB17053.1	TPR repeat protein
UV8b_2370	JHTR01000009.1	424649	426218	+	2622.2	1569	605	KDB16779.1	fungal specific transcription factor
UV8b_167	JHTR01000001.1	521856	522861	+	1501.2	1005	780	KDB18776.1	RNA export mediator Gle1
UV8b_4028	JHTR01000018.1	440396	441021	+	929.2	625	269	KDB15188.1	multiple myeloma tumor-associated protein 2
UV8b_7192	JHTR01000054.1	109149	110025	+	1291.7	876	253	KDB11963.1	hypothetical protein UV8b_7192
UV8b_7384	JHTR01000059.1	158074	158701	+	848.3	627	337	KDB11796.1	methyltransferase
UV8b_1446	JHTR01000005.1	269314	271273	+	3151.8	1959	575	KDB17562.1	dihydrodipicolinate synthase
UV8b_5420	JHTR01000029.1	412361	412990	+	821.9	629	310	KDB13813.1	U3 snoRNP protein
UV8b_2033	JHTR01000008.1	105853	107176	+	1809.5	1323	353	KDB16941.1	Importin-beta domain containing protein
UV8b_7419	JHTR01000061.1	49117	50661	+	2621.5	1544	2929	KDB11710.1	ubiquitin carboxyl-terminal hydrolase 19
UV8b_7038	JHTR01000051.1	32528	33657	+	1504.2	1129	2181	KDB12045.1	hypothetical protein UV8b_7038
UV8b_3353	JHTR01000014.1	226237	228003	+	2840.2	1766	771	KDB15713.1	putative Cu-ATPase
UV8b_2498	JHTR01000009.1	841370	842580	+	1701.5	1210	381	KDB16907.1	putative negative acting factor
UV8b_708	JHTR01000002.1	629198	629873	+	888	675	406	KDB18466.1	transport protein
UV8b_1594	JHTR01000005.1	742086	742971	+	1281.8	885	387	KDB17710.1	anaphase-promoting complex subunit Apc5
UV8b_4321	JHTR01000020.1	223960	227235	+	5119.3	3275	1364	KDB14798.1	sec20 domain protein
UV8b_7260	JHTR01000056.1	157432	158325	+	1189.6	893	-11	KDB11935.1	phosphotransferase enzyme family protein
UV8b_4076	JHTR01000019.1	67397	68526	+	1658.2	1129	1022	KDB14930.1	hypothetical protein UV8b_4076
UV8b_1557	JHTR01000005.1	614363	615532	+	1729.3	1169	363	KDB17673.1	putative C2H2 finger domain protein
UV8b_5063	JHTR01000026.1	244845	245345	+	834.6	500	154	KDB14074.1	ER to Golgi transporter Yif1
UV8b_7027	JHTR01000050.1	115376	117150	+	4167.7	1774	891	KDB12124.1	fungal transcriptional regulatory protein
UV8b_6150	JHTR01000037.1	58792	59292	+	748.2	500	186	KDB12948.1	hypothetical protein UV8b_6150
UV8b_6579	JHTR01000042.1	80403	81680	+	1584.7	1277	1104	KDB12558.1	putative mucin
UV8b_1130	JHTR01000003.1	923355	924107	+	1165.8	752	268	KDB18282.1	endosome-associated ubiquitin isopeptidase (AmsH)
UV8b_2251	JHTR01000009.1	38447	38947	+	411.2	500	-811	KDB16660.1	L-arabinitol 4-dehydrogenase
UV8b_565	JHTR01000002.1	196357	196857	+	521.3	500	1336	KDB18323.1	mitochondrial genome maintenance protein MGM101
UV8b_5306	JHTR01000028.1	435228	436489	+	2089.1	1261	-43	KDB13972.1	protein hob3
UV8b_1841	JHTR01000007.1	328928	330782	+	2344.3	1854	550	KDB17244.1	sequence orphan
UV8b_2433	JHTR01000009.1	633270	634148	+	1552	878	715	KDB16842.1	putative mitochondrial carrier protein
UV8b_7448	JHTR01000061.1	146302	147556	+	2056.2	1254	277	KDB11739.1	putative PHD finger domain protein
UV8b_7662	JHTR01000067.1	128084	129712	+	2478.4	1628	811	KDB11517.1	TPR repeat-containing protein
UV8b_3057	JHTR01000012.1	433737	434613	+	1404	876	752	KDB16127.1	hypothetical protein UV8b_3057
UV8b_1581	JHTR01000005.1	685322	686453	+	1606.2	1131	520	KDB17697.1	40S ribosomal protein S9
UV8b_1893	JHTR01000007.1	531330	531955	+	911.8	625	261	KDB17296.1	Multifunctional beta-oxidation protein
UV8b_6331	JHTR01000039.1	225457	226332	+	1302.3	875	268	KDB12837.1	mitochondrial Rho GTPase 1
UV8b_2633	JHTR01000010.1	429783	430663	+	1188.6	880	22	KDB16598.1	nuclear distribution protein nudE
UV8b_5464	JHTR01000030.1	122780	124040	+	2317	1260	1189	KDB13632.1	putative spindle poison sensitivity protein Scp3
UV8b_8261	JHTR01000100.1	51042	52051	+	1406.6	1009	641	KDB10889.1	malate dehydrogenase precursor
UV8b_1251	JHTR01000004.1	366111	368727	+	4390.6	2616	1070	KDB17884.1	Serine/threonine-protein kinase
UV8b_5227	JHTR01000028.1	201685	202557	+	1261.6	872	390	KDB13893.1	hypothetical protein UV8b_5227
UV8b_3355	JHTR01000014.1	231562	232718	+	1859.9	1156	396	KDB15715.1	putative RGS domain protein (Rax1)
UV8b_129	JHTR01000001.1	413199	413699	+	359.2	500	-1517	KDB18738.1	60s ribosomal protein l38
UV8b_5843	JHTR01000033.1	102887	103824	+	1465.2	937	443	KDB13253.1	beta-chimaerin
UV8b_3999	JHTR01000018.1	346430	347432	+	1542.8	1002	74	KDB15159.1	putative muscle-derived protein (neurite-outgrowth-promoting)
UV8b_4095	JHTR01000019.1	114113	115280	+	1383.3	1167	1234	KDB14949.1	putative MAP kinase
UV8b_617	JHTR01000002.1	351390	352641	+	2127.7	1251	402	KDB18375.1	DIL and Ankyrin domain containing protein
UV8b_5332	JHTR01000029.1	77778	79545	+	3199.4	1767	518	KDB13725.1	cell cycle control protein (Cwf22)
UV8b_1611	JHTR01000005.1	784750	786049	+	1865.8	1299	401	KDB17727.1	CHCH domain protein
UV8b_5899	JHTR01000033.1	248819	249570	+	1085.3	751	324	KDB13309.1	syntaxin
UV8b_7899	JHTR01000075.1	118919	119419	+	480.4	500	258	KDB11289.1	NADH:ubiquinone oxidoreductase 20.8kD subunit
UV8b_7405	JHTR01000061.1	205	1682	+	2529	1477	393	KDB11696.1	transcriptional repressor tup1
UV8b_3316	JHTR01000014.1	88842	89744	+	1053.5	902	691	KDB15676.1	peptidyl-tRNA hydrolase domain-containing protein
UV8b_1250	JHTR01000004.1	361662	362287	+	977.7	625	277	KDB17883.1	A49-like RNA polymerase I associated factor
UV8b_4343	JHTR01000020.1	283781	285052	+	1744.6	1271	142	KDB14820.1	ATP synthase H chain precursor
UV8b_6770	JHTR01000045.1	128679	129574	+	1146.5	895	295	KDB12407.1	ER membrane protein
UV8b_4351	JHTR01000020.1	301948	303131	+	1996.4	1183	310	KDB14828.1	hypothetical protein UV8b_4351
UV8b_3583	JHTR01000015.1	251271	252800	+	2009.3	1529	501	KDB15552.1	hypothetical protein UV8b_3583
UV8b_2560	JHTR01000010.1	173276	174152	+	1167	876	465	KDB16525.1	60S ribosomal protein L34
UV8b_6321	JHTR01000039.1	196182	198877	+	4282.3	2695	-434	KDB12827.1	3,4-dihydroxy-2-butanone 4-phosphate synthase
UV8b_18	JHTR01000001.1	72884	73890	+	1455.8	1006	126	KDB18627.1	putative septum initiation protein sid3
UV8b_1901	JHTR01000007.1	551747	554381	+	6254.5	2634	1303	KDB17304.1	regulator of G protein signaling pathway
UV8b_5809	JHTR01000032.1	372455	373269	+	971.4	814	-10	KDB13430.1	MDR efflux pump ABC3
UV8b_2545	JHTR01000010.1	129043	130116	+	1527.1	1073	-67	KDB16510.1	external NADH-ubiquinone oxidoreductase
UV8b_739	JHTR01000002.1	701830	703650	+	3116.8	1820	940	KDB18497.1	60S ribosomal protein L3
UV8b_2791	JHTR01000011.1	317938	319192	+	2029.8	1254	379	KDB16335.1	guanine nucleotide exchange factor-like protein
UV8b_319	JHTR01000001.1	1074095	1074972	+	1346.5	877	-199	KDB18928.1	DNA repair and recombination protein RAD5B
UV8b_2523	JHTR01000010.1	45955	47277	+	2181.2	1322	647	KDB16488.1	hypothetical protein UV8b_2523
UV8b_5130	JHTR01000026.1	459054	461143	+	3631.7	2089	701	KDB14141.1	conserved glutamic acid rich protein
UV8b_2656	JHTR01000010.1	545410	546822	+	2473.3	1412	562	KDB16621.1	Rhomboid family protein
UV8b_6426	JHTR01000040.1	224545	225693	+	1763.1	1148	395	KDB12770.1	hypothetical protein UV8b_6426
UV8b_2655	JHTR01000010.1	542135	543707	+	2347.1	1572	-192	KDB16620.1	hypothetical protein UV8b_2655
UV8b_3973	JHTR01000018.1	271040	271790	+	1138.7	750	369	KDB15133.1	U4/U6.U5 tri-snRNP-associated protein 2
UV8b_2820	JHTR01000011.1	435436	436188	+	1085.8	752	351	KDB16364.1	DUF1682 domain protein
UV8b_7289	JHTR01000057.1	134016	135548	+	3082.4	1532	404	KDB11866.1	multisynthetase complex auxiliary component p43
UV8b_1085	JHTR01000003.1	782486	783806	+	1998	1320	443	KDB18237.1	purine transporter
UV8b_984	JHTR01000003.1	476102	476602	+	659	500	39	KDB18136.1	transaldolase
UV8b_2552	JHTR01000010.1	157046	157679	+	907.3	633	378	KDB16517.1	DnaJ domain containing protein
UV8b_3287	JHTR01000013.1	537910	538535	+	708	625	364	KDB15975.1	FAD dependent oxidoreductase
UV8b_4022	JHTR01000018.1	419781	423403	+	6741.4	3622	1697	KDB15182.1	hypothetical protein UV8b_4022
UV8b_4219	JHTR01000019.1	506279	506904	+	885.9	625	418	KDB15073.1	TAM domain methyltransferase
UV8b_1789	JHTR01000007.1	157927	159108	+	1827.6	1181	787	KDB17192.1	Malate synthase, glyoxysomal
UV8b_1813	JHTR01000007.1	236210	237474	+	2410.9	1264	379	KDB17216.1	C3HC4 type (RING finger) zinc finger containing protein
UV8b_2357	JHTR01000009.1	392416	393193	+	1205.3	777	1038	KDB16766.1	putative sphingomyelinase family protein
UV8b_4307	JHTR01000020.1	190501	191126	+	846.4	625	259	KDB14784.1	calcium-transporting ATPase type 2C member 1
UV8b_723	JHTR01000002.1	657330	658581	+	2178.3	1251	294	KDB18481.1	SART-1 family protein
UV8b_5784	JHTR01000032.1	276612	278076	+	2044.9	1464	536	KDB13405.1	ubiquitin-conjugating enzyme E2 4
UV8b_768	JHTR01000002.1	814448	816922	+	3042.4	2474	-108	KDB18526.1	26S proteasome non-ATPase regulatory subunit 11
UV8b_1481	JHTR01000005.1	374068	375200	+	1948.4	1132	760	KDB17597.1	putative RNA-binding protein
UV8b_6855	JHTR01000047.1	3250	4254	+	1730.7	1004	390	KDB12256.1	putative ATP binding protein
UV8b_2696	JHTR01000011.1	56545	57546	+	1468.5	1001	265	KDB16240.1	F-box/LRR repeat containing protein 2
UV8b_1854	JHTR01000007.1	362765	364339	+	2584.6	1574	760	KDB17257.1	fungal specific transcription factor domain-containing protein
UV8b_4280	JHTR01000020.1	105782	107491	+	3006.1	1709	-483	KDB14757.1	septin
UV8b_2372	JHTR01000009.1	436274	437025	+	1049.5	751	409	KDB16781.1	hypothetical protein UV8b_2372
UV8b_3528	JHTR01000015.1	111850	113391	+	3052.5	1541	3295	KDB15497.1	histone acetyltransferase GCN5
UV8b_5891	JHTR01000033.1	229841	231473	+	3330.2	1632	414	KDB13301.1	phosphomevalonate kinase
UV8b_3408	JHTR01000014.1	403145	404939	+	2195.8	1794	-41	KDB15768.1	putative vesicular transport protein
UV8b_5889	JHTR01000033.1	225040	228296	+	6413.3	3256	1447	KDB13299.1	pentatricopeptide repeat protein
UV8b_5615	JHTR01000031.1	171885	172512	+	619.3	627	712	KDB13517.1	glycine-rich RNA-binding protein
UV8b_3283	JHTR01000013.1	518737	522188	+	7919.5	3451	-172	KDB15971.1	hypothetical protein UV8b_3283
UV8b_3706	JHTR01000016.1	17965	18844	+	1385.1	879	277	KDB15280.1	ornithine decarboxylase antizyme
UV8b_5500	JHTR01000030.1	227795	229049	+	2392.8	1254	849	KDB13668.1	fungal transcriptional regulatory protein
UV8b_2919	JHTR01000011.1	691198	692333	+	1644.5	1135	143	KDB16463.1	adenylosuccinate synthetase
UV8b_4303	JHTR01000020.1	182862	184899	+	3092.7	2037	-215	KDB14780.1	THO complex subunit 7
UV8b_433	JHTR01000001.1	1762116	1763380	+	1658.9	1264	729	KDB19042.1	pyruvate dehydrogenase E1 component alpha subunit
UV8b_5120	JHTR01000026.1	428779	430050	+	1800.3	1271	296	KDB14131.1	arg-6 protein precursor
UV8b_2531	JHTR01000010.1	75478	75978	+	810.1	500	194	KDB16496.1	mitochondrial import receptor subunit tom-22
UV8b_1615	JHTR01000005.1	795013	798599	+	6499	3586	1144	KDB17731.1	RacA
UV8b_3969	JHTR01000018.1	259629	260882	+	2134.1	1253	447	KDB15129.1	putative cell division cycle related protein kinase 7
UV8b_5024	JHTR01000026.1	118526	119281	+	1122	755	519	KDB14035.1	transcription factor
UV8b_5856	JHTR01000033.1	144355	145360	+	1293.6	1005	565	KDB13266.1	acyl-CoA dehydrogenase precursor
UV8b_1560	JHTR01000005.1	628006	628506	+	730.1	500	443	KDB17676.1	T-complex protein 1, beta subunit
UV8b_1246	JHTR01000004.1	344823	347089	+	4352	2266	821	KDB17879.1	4-aminobutyrate aminotransferase
UV8b_19	JHTR01000001.1	76887	77896	+	1503.1	1009	314	KDB18628.1	hypothetical protein UV8b_19
UV8b_6866	JHTR01000047.1	46279	47170	+	1139.2	891	830	KDB12267.1	C4 finger domain protein
UV8b_5219	JHTR01000028.1	180947	181798	+	1200.6	851	-200	KDB13885.1	mitochondrial carrier protein
UV8b_6344	JHTR01000039.1	261349	262230	+	1053.7	881	58	KDB12850.1	copper-sensing transcription factor
UV8b_930	JHTR01000003.1	270638	271519	+	1187.9	881	175	KDB18082.1	protein SSU72
UV8b_7366	JHTR01000059.1	67868	69297	+	2278.6	1429	650	KDB11778.1	glycoside hydrolase family 12 protein
UV8b_1903	JHTR01000007.1	564347	565601	+	1813.5	1254	273	KDB17306.1	putative Pol II transcription elongation factor subunit Cdc73
UV8b_4844	JHTR01000024.1	201750	203129	+	2436.3	1379	605	KDB14249.1	integral membrane protein
UV8b_8113	JHTR01000082.1	84186	84939	+	1041.3	753	292	KDB11049.1	hypothetical protein UV8b_8113
UV8b_7193	JHTR01000054.1	114765	115672	+	1433.2	907	342	KDB11964.1	stress response protein nst1
UV8b_1056	JHTR01000003.1	700951	701827	+	1314.1	876	368	KDB18208.1	prolyl 4-hydroxylase
UV8b_7302	JHTR01000057.1	170111	170862	+	1048.1	751	-136	KDB11879.1	serine/threonine-protein kinase gad8
UV8b_867	JHTR01000003.1	86582	87588	+	1522.1	1006	349	KDB18019.1	DUF500 domain-containing protein
UV8b_8153	JHTR01000083.1	95556	97615	+	3981	2059	917	KDB11025.1	paf-acetylhydrolase family member
UV8b_7408	JHTR01000061.1	14920	16680	+	2768.6	1760	121	KDB11699.1	DNA repair helicase RAD25
UV8b_2369	JHTR01000009.1	420719	422239	+	2444.8	1520	474	KDB16778.1	hypothetical protein UV8b_2369
UV8b_6707	JHTR01000044.1	202019	202896	+	1236.4	877	195	KDB12483.1	sorting nexin-like protein
UV8b_5138	JHTR01000026.1	490691	492217	+	2645.3	1526	511	KDB14149.1	hypothetical protein UV8b_5138
UV8b_5293	JHTR01000028.1	388876	389641	+	768.2	765	-500	KDB13959.1	vacuolar protein sorting protein
UV8b_3972	JHTR01000018.1	267901	268777	+	1476	876	315	KDB15132.1	eukaryotic translation initiation factor 4E-4
UV8b_1048	JHTR01000003.1	665899	668562	+	6343.2	2663	1338	KDB18200.1	3-isopropylmalate dehydratase
UV8b_3058	JHTR01000012.1	439414	440621	+	1679.8	1207	2153	KDB16128.1	extensin
UV8b_4063	JHTR01000019.1	24066	25066	+	1697.2	1000	417	KDB14917.1	methionyl-tRNA synthetase
UV8b_2230	JHTR01000008.1	794475	798802	+	8235.3	4327	1947	KDB17138.1	ankyrin repeat protein
UV8b_4067	JHTR01000019.1	34754	35379	+	802.1	625	285	KDB14921.1	ubiquinol-cytochrome C reductase-like protein
UV8b_5979	JHTR01000034.1	289507	290647	+	1948.4	1140	167	KDB13219.1	kexin-like protease
UV8b_2382	JHTR01000009.1	492877	493506	+	1040.3	629	299	KDB16791.1	Mediator of RNA polymerase II transcription subunit 5
UV8b_7529	JHTR01000063.1	162934	163434	+	727.3	500	300	KDB11672.1	DNA repair protein rad32
UV8b_5866	JHTR01000033.1	170759	172010	+	1897.5	1251	312	KDB13276.1	hypothetical protein UV8b_5866
UV8b_6179	JHTR01000037.1	138704	139329	+	1069.5	625	363	KDB12977.1	ribosomal biogenesis protein Gar2
UV8b_5167	JHTR01000028.1	31680	32555	+	1231.9	875	227	KDB13833.1	hypothetical protein UV8b_5167
UV8b_6841	JHTR01000046.1	225677	226935	+	1844.4	1258	431	KDB12354.1	ubiquinone biosynthesis monooxygenase COQ6
UV8b_5214	JHTR01000028.1	172570	173839	+	1966	1269	415	KDB13880.1	protein mlo3-like protein
UV8b_973	JHTR01000003.1	428144	428644	+	725.4	500	2759	KDB18125.1	COP9 signalosome complex subunit 5
UV8b_1003	JHTR01000003.1	535241	536000	+	1090	759	-1122	KDB18155.1	hypothetical protein UV8b_1003
UV8b_7841	JHTR01000074.1	55466	56472	+	1369.1	1006	251	KDB11312.1	ATP-dependent RNA helicase rok1
UV8b_8030	JHTR01000080.1	78970	79723	+	921.9	753	157	KDB11120.1	TruB family pseudouridylate synthase containing protein
UV8b_5588	JHTR01000031.1	101660	103146	+	2167	1486	544	KDB13490.1	putative RNA polymerase II transcription factor SIII (Elongin) subunit A,putative
UV8b_7045	JHTR01000051.1	43465	44116	+	1094.9	651	-194	KDB12052.1	hypothetical protein UV8b_7045
UV8b_8225	JHTR01000092.1	48115	49287	+	1836.8	1172	568	KDB10931.1	R3H domain-containing protein
UV8b_6611	JHTR01000042.1	194482	195899	+	1772.1	1417	551	KDB12590.1	mitochondrial peroxiredoxin PRX1
UV8b_2471	JHTR01000009.1	765304	766734	+	2140	1430	757	KDB16880.1	hypothetical protein UV8b_2471
UV8b_5079	JHTR01000026.1	299271	300522	+	1921.1	1251	89	KDB14090.1	phospholipase c
UV8b_4567	JHTR01000021.1	541942	543247	+	2304	1305	386	KDB14711.1	RLI and DUF367 domain protein
UV8b_4625	JHTR01000022.1	547814	549470	+	3232.3	1656	535	KDB14575.1	putative 6-phosphogluconolactonase
UV8b_374	JHTR01000001.1	1589397	1590163	+	1053.5	766	270	KDB18983.1	peptidyl-prolyl cis-trans isomerase cyp8
UV8b_4563	JHTR01000021.1	527043	528420	+	2218.8	1377	97	KDB14707.1	putative eukaryotic translation initiation factor subunit eIF2A
UV8b_3117	JHTR01000012.1	609950	611510	+	2623.7	1560	604	KDB16187.1	G-protein beta subunit
UV8b_4183	JHTR01000019.1	406167	407421	+	1597	1254	525	KDB15037.1	amidophosphoribosyltransferase
UV8b_475	JHTR01000001.1	2017388	2018956	+	2621.3	1568	677	KDB19084.1	ribonuclease Z
UV8b_2172	JHTR01000008.1	578576	579348	+	968.5	772	306	KDB17080.1	heat shock 70 kDa protein precursor
UV8b_6243	JHTR01000038.1	54430	55325	+	927.4	895	383	KDB12882.1	putative sorting nexin-3
UV8b_4170	JHTR01000019.1	361723	362498	+	1042.4	775	-616	KDB15024.1	protein ORM1
UV8b_6266	JHTR01000038.1	139786	140791	+	1714.4	1005	401	KDB12905.1	SAP domain containing protein
UV8b_3726	JHTR01000016.1	86162	86662	+	659.3	500	312	KDB15300.1	small nuclear ribonucleoprotein SmF
UV8b_2263	JHTR01000009.1	77080	79059	+	3993	1979	796	KDB16672.1	immunogenic protein
UV8b_535	JHTR01000001.1	2272233	2273360	+	1634.9	1127	487	KDB19144.1	aldehyde dehydrogenase
UV8b_8050	JHTR01000081.1	21287	22545	+	2121.4	1258	335	KDB11062.1	hypothetical protein UV8b_8050
UV8b_992	JHTR01000003.1	503439	504589	+	1886.5	1150	1442	KDB18144.1	amidase protein
UV8b_6328	JHTR01000039.1	216076	217886	+	3169.5	1810	921	KDB12834.1	arrestin domain-containing protein
UV8b_1655	JHTR01000005.1	917342	919111	+	4250.8	1769	594	KDB17771.1	phosphopantothenate-cysteine ligase
UV8b_2935	JHTR01000012.1	94031	94785	+	1156.6	754	427	KDB16005.1	protein kinase SNF1
UV8b_5793	JHTR01000032.1	301862	304983	+	4847.2	3121	-151	KDB13414.1	Octapeptidyl aminopeptidase
UV8b_3350	JHTR01000014.1	210169	210925	+	1169.5	756	275	KDB15710.1	sporulation protein RMD8
UV8b_4533	JHTR01000021.1	342671	343171	+	587.7	500	473	KDB14677.1	T-complex protein 1 subunit zeta
UV8b_8236	JHTR01000092.1	79197	79956	+	865.7	759	511	KDB10942.1	2-nitropropane dioxygenase
UV8b_3275	JHTR01000013.1	481604	483585	+	4512.3	1981	587	KDB15963.1	nmt1 protein
UV8b_1890	JHTR01000007.1	518215	519215	+	1496.5	1000	74	KDB17293.1	G-protein alpha subunit
UV8b_4924	JHTR01000024.1	466519	467655	+	1752.1	1136	312	KDB14329.1	NADH-ubiquinone oxidoreductase 51 kDa subunit
UV8b_7375	JHTR01000059.1	96775	97275	+	633.4	500	75	KDB11787.1	isocitrate lyase
UV8b_452	JHTR01000001.1	1955778	1956403	+	842.9	625	168	KDB19061.1	hypothetical protein UV8b_452
UV8b_5572	JHTR01000031.1	55172	56128	+	1306.5	956	257	KDB13474.1	Bromodomain associated domain protein
UV8b_7048	JHTR01000051.1	51165	52361	+	2084	1196	539	KDB12055.1	Autophagy-related protein 17
UV8b_4599	JHTR01000022.1	440675	441600	+	1683.8	925	482	KDB14549.1	HMG box protein
UV8b_5513	JHTR01000030.1	270593	271595	+	1573.7	1002	1780	KDB13681.1	hypothetical protein UV8b_5513
UV8b_5852	JHTR01000033.1	134268	134893	+	1036.6	625	466	KDB13262.1	DNA-directed RNA polymerase III complex subunit Rpc37
UV8b_225	JHTR01000001.1	719016	720018	+	1200.6	1002	304	KDB18834.1	putative ubiquitin conjugating enzyme (UbcC)
UV8b_2777	JHTR01000011.1	273749	275871	+	2839.3	2122	582	KDB16321.1	DUF2347 superfamily protein
UV8b_7163	JHTR01000053.1	101414	101914	+	629.1	500	299	KDB12020.1	AdoMet-dependent rRNA methyltransferase spb1
UV8b_4179	JHTR01000019.1	385236	386396	+	1703.6	1160	538	KDB15033.1	hypothetical protein UV8b_4179
UV8b_2199	JHTR01000008.1	693215	695748	+	4765.8	2533	1087	KDB17107.1	La domain family
UV8b_2240	JHTR01000009.1	1940	3317	+	2917.9	1377	238	KDB16649.1	mitochondrial hypoxia responsive domain containing protein
UV8b_1026	JHTR01000003.1	604697	605697	+	1143.9	1000	779	KDB18178.1	putative COP9 signalosome subunit 6 (CsnF)
UV8b_7852	JHTR01000074.1	95571	96734	+	1744.6	1163	471	KDB11323.1	mitochondrial processing peptidase beta subunit
UV8b_6531	JHTR01000041.1	250016	250912	+	1196.1	896	406	KDB12685.1	phosphorylcholine transferase
UV8b_7445	JHTR01000061.1	133324	134737	+	2364.8	1413	351	KDB11736.1	G protein gamma subunit
UV8b_5488	JHTR01000030.1	193610	194235	+	958.2	625	303	KDB13656.1	autophagy-related protein 26
UV8b_7932	JHTR01000077.1	50908	52685	+	3430.5	1777	502	KDB11199.1	hypothetical protein UV8b_7932
UV8b_6241	JHTR01000038.1	48462	49364	+	1363.7	902	399	KDB12880.1	Dolichyl-phosphate-mannose-protein mannosyltransferase containing protein
UV8b_5372	JHTR01000029.1	195009	196388	+	2083.3	1379	-35	KDB13765.1	hypothetical protein UV8b_5372
UV8b_4325	JHTR01000020.1	236760	237892	+	1484	1132	320	KDB14802.1	methylmalonate semialdehyde dehydrogenase
UV8b_2632	JHTR01000010.1	423072	425040	+	3216.1	1968	557	KDB16597.1	acetyl-CoA carboxylase
UV8b_2761	JHTR01000011.1	232606	234240	+	3433.1	1634	342	KDB16305.1	integral membrane protein
UV8b_96	JHTR01000001.1	314096	318161	+	6483.9	4065	-702	KDB18705.1	glutamyl-tRNA amidotransferase subunit A
UV8b_8037	JHTR01000080.1	100365	100865	+	540.2	500	161	KDB11127.1	DUF410 domain-containing protein
UV8b_7460	JHTR01000062.1	1150	2342	+	1998	1192	475	KDB11674.1	hypothetical protein UV8b_7460
UV8b_728	JHTR01000002.1	667692	668568	+	1217.1	876	96	KDB18486.1	KH domain protein
UV8b_2938	JHTR01000012.1	101878	103009	+	1570.4	1131	584	KDB16008.1	neutral trehalase
UV8b_2292	JHTR01000009.1	172511	173643	+	1708.8	1132	117	KDB16701.1	kinesin
UV8b_1842	JHTR01000007.1	332475	333600	+	2038.8	1125	1182	KDB17245.1	MAP kinase activator
UV8b_3437	JHTR01000014.1	490318	490943	+	973.7	625	393	KDB15797.1	pre-mRNA splicing factor slt11
UV8b_5660	JHTR01000031.1	318288	320855	+	4113.5	2567	-191	KDB13562.1	NPL4 family protein
UV8b_6187	JHTR01000037.1	160127	160878	+	1086	751	285	KDB12985.1	putative mitochondrial serine-tRNA ligase
UV8b_6592	JHTR01000042.1	140852	142850	+	3941	1998	813	KDB12571.1	putative amino acid permease family protein
UV8b_3030	JHTR01000012.1	362409	363160	+	1023.4	751	230	KDB16100.1	E3 ubiquitin-protein ligase
UV8b_3477	JHTR01000014.1	623398	625811	+	5101.9	2413	1013	KDB15837.1	inositol hexaphosphate kinase KCS1
UV8b_3233	JHTR01000013.1	346924	347888	+	1065.5	964	503	KDB15921.1	zinc finger protein 364
UV8b_4426	JHTR01000020.1	548021	549276	+	2096.9	1255	589	KDB14903.1	U2 snRNP component prp10
UV8b_4929	JHTR01000024.1	478031	479034	+	1674.9	1003	265	KDB14334.1	hypothetical protein UV8b_4929
UV8b_4361	JHTR01000020.1	330897	332886	+	2778.8	1989	-347	KDB14838.1	putative ribosomal protein DAP3
UV8b_5245	JHTR01000028.1	259347	259847	+	836.5	500	518	KDB13911.1	putative DEAD/DEAH box helicase (Sbp4)
UV8b_3623	JHTR01000015.1	388914	389791	+	1248.4	877	150	KDB15592.1	RIO1 family protein
UV8b_2995	JHTR01000012.1	257260	257760	+	643.7	500	716	KDB16065.1	putative Pre-mRNA splicing protein prp5
UV8b_5071	JHTR01000026.1	277132	278132	+	1500.7	1000	3012	KDB14082.1	intramembrane protease
UV8b_5074	JHTR01000026.1	286841	287341	+	691	500	677	KDB14085.1	Dienelactone hydrolase family
UV8b_397	JHTR01000001.1	1651402	1653323	+	3899.6	1921	552	KDB19006.1	pentatricopeptide repeat protein
UV8b_1380	JHTR01000005.1	44584	45346	+	1142.5	762	269	KDB17496.1	suaprga1-like protein
UV8b_4276	JHTR01000020.1	98502	99302	+	1091.9	800	191	KDB14753.1	dynein family protein
UV8b_1843	JHTR01000007.1	338821	339321	+	636.9	500	245	KDB17246.1	SAC3/GANP domain protein
UV8b_7447	JHTR01000061.1	137185	138694	+	2651.2	1509	489	KDB11738.1	serine/threonine-protein phosphatase PP1
UV8b_7847	JHTR01000074.1	75992	77498	+	2146.3	1506	3453	KDB11318.1	UDP-N-acetylglucosamine pyrophosphorylase
UV8b_3741	JHTR01000016.1	133127	134253	+	1599.8	1126	295	KDB15315.1	RAN binding protein
UV8b_6324	JHTR01000039.1	203139	204019	+	1314.5	880	371	KDB12830.1	chromosomal organization and DNA repair protein
UV8b_186	JHTR01000001.1	609004	609875	+	1129.3	871	-918	KDB18795.1	hypothetical protein UV8b_186
UV8b_8256	JHTR01000099.1	36483	36983	+	698.8	500	433	KDB10898.1	HECT domain-containing protein
UV8b_8018	JHTR01000080.1	26452	26952	+	674.6	500	299	KDB11108.1	kinesin related protein 2
UV8b_2047	JHTR01000008.1	169499	170500	+	1368.2	1001	306	KDB16955.1	putative mitochondrial DnaJ chaperone (Mdj1)
UV8b_7962	JHTR01000077.1	132475	133351	+	1302.1	876	825	KDB11229.1	ras-2 protein
UV8b_1777	JHTR01000007.1	104287	106814	+	3777.4	2527	1190	KDB17180.1	60S ribosomal protein L24a
UV8b_778	JHTR01000002.1	846163	848063	+	4232.4	1900	500	KDB18536.1	PHD finger domain protein
UV8b_2221	JHTR01000008.1	768799	770155	+	1762	1356	164	KDB17129.1	hypothetical protein UV8b_2221
UV8b_4827	JHTR01000024.1	119864	121560	+	2650.7	1696	330	KDB14232.1	putative negative regulator of DNA transposition (Rtt106)
UV8b_5978	JHTR01000034.1	284749	286326	+	2687.7	1577	412	KDB13218.1	putative vacuolar targeting protein Atg24
UV8b_7531	JHTR01000064.1	37319	38218	+	1164.4	899	467	KDB11608.1	electron transfer flavoprotein alpha-subunit precursor
UV8b_408	JHTR01000001.1	1691286	1692539	+	1741	1253	562	KDB19017.1	eukaryotic translation initiation factor 6
UV8b_5174	JHTR01000028.1	53285	55336	+	3584.2	2051	773	KDB13840.1	hypothetical protein UV8b_5174
UV8b_6078	JHTR01000036.1	176939	177564	+	897.7	625	1960	KDB13078.1	matrix AAA protease MAP-1
UV8b_6484	JHTR01000041.1	103339	104613	+	1907.4	1274	451	KDB12638.1	protein phosphatase PP2A regulatory subunit B
UV8b_7134	JHTR01000053.1	19729	21110	+	2664.6	1381	550	KDB11991.1	secretion pathway protein Sls2/Rcy1
UV8b_6846	JHTR01000046.1	233916	235047	+	1809	1131	-125	KDB12359.1	CorA family metal ion transporter
UV8b_4428	JHTR01000020.1	570134	571010	+	1348.9	876	74	KDB14905.1	cellular morphogenesis protein
UV8b_7609	JHTR01000066.1	139390	140142	+	1038.2	752	227	KDB11567.1	NADH:ubiquinone oxidoreductase 18.4kD subunit
UV8b_1856	JHTR01000007.1	368889	369766	+	878.9	877	181	KDB17259.1	protein transport protein SEC61 alpha subunit
UV8b_406	JHTR01000001.1	1684690	1685190	+	620.4	500	370	KDB19015.1	putative GTP-binding protein Sey1
UV8b_3293	JHTR01000013.1	551474	552439	+	1267	965	900	KDB15981.1	alanine racemase domain protein
UV8b_2596	JHTR01000010.1	278612	279237	+	870.4	625	372	KDB16561.1	60S ribosomal protein L20
UV8b_1728	JHTR01000006.1	706559	708206	+	2976	1647	820	KDB17471.1	curved DNA-binding protein
UV8b_8103	JHTR01000082.1	37971	38975	+	1533.2	1004	187	KDB11039.1	transcription factor pcc1
UV8b_6835	JHTR01000046.1	164696	166168	+	2457.7	1472	365	KDB12348.1	negative acting factor
UV8b_2535	JHTR01000010.1	90234	91909	+	3060	1675	4871	KDB16500.1	60S ribosomal protein L32
UV8b_1729	JHTR01000006.1	710563	711571	+	1753	1008	1434	KDB17472.1	essential subunit of the histone deacetylase Rpd3S complex
UV8b_628	JHTR01000002.1	399386	400014	+	954	628	153	KDB18386.1	glutathione-disulfide reductase
UV8b_985	JHTR01000003.1	479594	480607	+	1636	1013	270	KDB18137.1	putative transcription factor (Snd1/p100)
UV8b_3586	JHTR01000015.1	265235	266139	+	1247.7	904	227	KDB15555.1	suppressor of Mek1
UV8b_3024	JHTR01000012.1	337855	339197	+	2284	1342	421	KDB16094.1	putative RNA polymerase II transcription elongation factor Rtf1p
UV8b_189	JHTR01000001.1	620903	622174	+	1671.6	1271	429	KDB18798.1	putative GARP complex component (Vps54)
UV8b_3689	JHTR01000015.1	564045	567434	+	6849.2	3389	1608	KDB15658.1	C2H2 transcription factor
UV8b_5491	JHTR01000030.1	199883	200512	+	982.2	629	435	KDB13659.1	hypothetical protein UV8b_5491
UV8b_6936	JHTR01000048.1	180860	182151	+	2072.9	1291	544	KDB12232.1	ABC drug exporter AtrF
UV8b_4510	JHTR01000021.1	251590	253909	+	3253.5	2319	-105	KDB14654.1	ribosome biogenesis ATPase RIX7
UV8b_8267	JHTR01000102.1	384	1510	+	2336.3	1126	332	KDB10863.1	hypothetical protein UV8b_8267
UV8b_5238	JHTR01000028.1	240212	242265	+	2897.9	2053	724	KDB13904.1	lte1 protein
UV8b_706	JHTR01000002.1	619655	621759	+	3920.8	2104	670	KDB18464.1	bHLH family transcription factor
UV8b_6220	JHTR01000037.1	266744	267871	+	1901.3	1127	265	KDB13018.1	transporter ATM1 precursor
UV8b_205	JHTR01000001.1	660350	661559	+	1987.9	1209	563	KDB18814.1	hypothetical protein UV8b_205
UV8b_4912	JHTR01000024.1	438595	439474	+	1353.8	879	337	KDB14317.1	snRNP and snoRNP protein (Snu13)
UV8b_6203	JHTR01000037.1	210633	211522	+	1271.9	889	300	KDB13001.1	hypothetical protein UV8b_6203
UV8b_3203	JHTR01000013.1	229657	230595	+	1359.5	938	310	KDB15891.1	BAR domain protein
UV8b_373	JHTR01000001.1	1586730	1587881	+	1851.9	1151	316	KDB18982.1	putative cell division control protein Cdc25
UV8b_1329	JHTR01000004.1	614425	615050	+	747.3	625	32	KDB17962.1	hypothetical protein UV8b_1329
UV8b_3320	JHTR01000014.1	100228	101372	+	1401.9	1144	527	KDB15680.1	Serine hydroxymethyltransferase
UV8b_729	JHTR01000002.1	671078	671843	+	1187.7	765	396	KDB18487.1	DUF974 domain-containing protein
UV8b_2084	JHTR01000008.1	305687	306564	+	941.2	877	392	KDB16992.1	regulator of conidiation
UV8b_8022	JHTR01000080.1	41197	42075	+	1279.9	878	633	KDB11112.1	putative metaxin
UV8b_6386	JHTR01000040.1	83692	86356	+	5089.4	2664	666	KDB12730.1	hypothetical protein UV8b_6386
UV8b_135	JHTR01000001.1	433296	434053	+	1124.4	757	74	KDB18744.1	PHD transcription factor
UV8b_1827	JHTR01000007.1	280739	281960	+	1684.1	1221	883	KDB17230.1	isovaleryl-CoA dehydrogenase precursor
UV8b_446	JHTR01000001.1	1930044	1931045	+	1703.6	1001	271	KDB19055.1	IQ calmodulin-binding motif domain protein
UV8b_5558	JHTR01000031.1	12023	12774	+	772.2	751	222	KDB13460.1	60S ribosomal protein L11
UV8b_370	JHTR01000001.1	1575504	1576255	+	1291.5	751	272	KDB18979.1	zinc finger containing protein
UV8b_1776	JHTR01000007.1	101826	103322	+	2430.4	1496	-1641	KDB17179.1	putative peroxisomal membrane protein
UV8b_6097	JHTR01000036.1	238755	239630	+	1444.9	875	1592	KDB13097.1	putative mitochondrial folate carrier protein Flx1
UV8b_1305	JHTR01000004.1	550310	551373	+	1343	1063	-1120	KDB17938.1	hypothetical protein UV8b_1305
UV8b_996	JHTR01000003.1	515331	516212	+	1982.5	881	422	KDB18148.1	DnaJ domain containing protein
UV8b_3336	JHTR01000014.1	153166	154043	+	1431.7	877	442	KDB15696.1	putative nucleoporin SONB
UV8b_5417	JHTR01000029.1	402661	404073	+	2139.3	1412	586	KDB13810.1	CCCH zinc finger domain-containing protein
UV8b_3573	JHTR01000015.1	230055	231072	+	1544	1017	549	KDB15542.1	mitochondrial carrier protein
UV8b_5134	JHTR01000026.1	472617	473497	+	1456.7	880	515	KDB14145.1	multidomain presynaptic cytomatrix related protein
UV8b_2719	JHTR01000011.1	115011	116140	+	1835.2	1129	595	KDB16263.1	hypothetical protein UV8b_2719
UV8b_8250	JHTR01000095.1	41391	43153	+	3335.6	1762	460	KDB10912.1	WD40 repeat-like-containing domain
UV8b_8140	JHTR01000083.1	46179	46807	+	844	628	322	KDB11012.1	LysR family protein
UV8b_6526	JHTR01000041.1	228814	230666	+	3450.3	1852	1427	KDB12680.1	putative endoplasmic reticulum-resident kdel protein
UV8b_5573	JHTR01000031.1	58699	59575	+	1125.1	876	261	KDB13475.1	pentatricopeptide repeat containing protein
UV8b_3314	JHTR01000014.1	82984	84697	+	2507.6	1713	655	KDB15674.1	putative aureobasidin-resistance protein
UV8b_4224	JHTR01000019.1	517055	519004	+	3848.8	1949	528	KDB15078.1	DNA repair protein rad26
UV8b_1662	JHTR01000005.1	934101	935102	+	2095.7	1001	-1775	KDB17778.1	putative CHIP protein (carboxyl terminus of Hsc70-interacting protein)
UV8b_1452	JHTR01000005.1	286294	287053	+	1023.4	759	339	KDB17568.1	sister chromatid cohesion protein
UV8b_289	JHTR01000001.1	979289	980299	+	1473.2	1010	-185	KDB18898.1	GPI-anchor transamidase precursor
UV8b_1466	JHTR01000005.1	324873	326153	+	1926.5	1280	405	KDB17582.1	ubiquinol-cytochrome-c reductase complex core protein 2
UV8b_1832	JHTR01000007.1	304046	304941	+	1279	895	518	KDB17235.1	hypothetical protein UV8b_1832
UV8b_5664	JHTR01000031.1	333114	333614	+	672.2	500	482	KDB13566.1	PWWP domain-containing protein
UV8b_5789	JHTR01000032.1	289737	290617	+	1183	880	481	KDB13410.1	putative oxysterol binding protein
UV8b_5416	JHTR01000029.1	400959	401585	+	628.4	626	418	KDB13809.1	40S ribosomal protein S20
UV8b_8019	JHTR01000080.1	34220	35606	+	2305.9	1386	381	KDB11109.1	RNA polymerase i specific transcription initiation factor
UV8b_4285	JHTR01000020.1	118826	120080	+	2019.2	1254	320	KDB14762.1	initiation-specific alpha-1,6-mannosyltransferase
UV8b_3132	JHTR01000012.1	664812	666782	+	4382.3	1970	884	KDB16202.1	L-Rhamnonate Dehydratase
UV8b_3866	JHTR01000016.1	526956	528083	+	2034.1	1127	333	KDB15440.1	putative signal transducer
UV8b_2310	JHTR01000009.1	226478	227353	+	1165.1	875	405	KDB16719.1	protein transport protein GOS1
UV8b_1325	JHTR01000004.1	597232	598797	+	2478.9	1565	1067	KDB17958.1	MAP kinase kinase kinase Ste11
UV8b_806	JHTR01000002.1	932520	934018	+	1806	1498	525	KDB18564.1	putative TFIIH and nucleotide excision repair factor 3 complexes subunit (Tfb2)
UV8b_1784	JHTR01000007.1	128602	130124	+	2765.1	1522	750	KDB17187.1	bZIP transcription factor (Fcr3)
UV8b_824	JHTR01000002.1	989222	991032	+	3319.2	1810	565	KDB18582.1	hypothetical protein UV8b_824
UV8b_2752	JHTR01000011.1	209916	210922	+	1490.1	1006	535	KDB16296.1	Presequence translocated-associated motor subunit pam17
UV8b_1437	JHTR01000005.1	233190	234193	+	1311.2	1003	3288	KDB17553.1	transporter protein smf2
UV8b_2314	JHTR01000009.1	237974	238474	+	644.2	500	260	KDB16723.1	pre-mRNA-processing ATP-dependent RNA helicase PRP5
UV8b_1274	JHTR01000004.1	439022	439929	+	1034.7	907	104	KDB17907.1	heavy metal tolerance protein precursor
UV8b_1066	JHTR01000003.1	727584	728983	+	2199.3	1399	574	KDB18218.1	pyruvate dehydrogenase E1 component beta subunit
UV8b_6772	JHTR01000045.1	132164	132789	+	834.9	625	198	KDB12409.1	dihydroceramide delta(4)-desaturase
UV8b_6540	JHTR01000041.1	278047	278940	+	1279	893	296	KDB12694.1	hypothetical protein UV8b_6540
UV8b_2171	JHTR01000008.1	575047	575547	+	664.9	500	-20	KDB17079.1	WD domain containing protein
UV8b_3968	JHTR01000018.1	254132	255386	+	2070.3	1254	319	KDB15128.1	hypothetical protein UV8b_3968
UV8b_3414	JHTR01000014.1	424380	425132	+	952.3	752	85	KDB15774.1	C2H2 type zinc finger containing protein
UV8b_3469	JHTR01000014.1	593466	598330	+	8285.2	4864	2275	KDB15829.1	putative serine/threonine protein kinase
UV8b_1886	JHTR01000007.1	498176	500166	+	3290.7	1990	3550	KDB17289.1	cullin
UV8b_7602	JHTR01000066.1	89568	91322	+	3618.6	1754	516	KDB11560.1	hypothetical protein UV8b_7602
UV8b_2365	JHTR01000009.1	407415	408294	+	1296.4	879	378	KDB16774.1	hemolysin-III family protein
UV8b_2201	JHTR01000008.1	709042	710296	+	1725.7	1254	575	KDB17109.1	bHLH family transcription factor
UV8b_202	JHTR01000001.1	653172	653672	+	711.3	500	194	KDB18811.1	COPII coat assembly protein SEC16
UV8b_1009	JHTR01000003.1	564572	565449	+	1119.9	877	273	KDB18161.1	branched-chain-amino-acid aminotransferase
UV8b_6677	JHTR01000044.1	96462	97604	+	1522.6	1142	1177	KDB12453.1	proline oxidase PrnD
UV8b_2277	JHTR01000009.1	115666	116686	+	1390.6	1020	508	KDB16686.1	hypothetical protein UV8b_2277
UV8b_1997	JHTR01000007.1	854509	855259	+	1072.1	750	561	KDB17400.1	ubiquitin carboxyl-terminal hydrolase 2
UV8b_2126	JHTR01000008.1	407537	409585	+	3186	2048	2026	KDB17034.1	ENTH domain containing protein
UV8b_3147	JHTR01000012.1	703958	705627	+	3356.4	1669	896	KDB16217.1	sucrose-6-phosphate hydrolase
UV8b_6857	JHTR01000047.1	8566	9324	+	1105.8	758	187	KDB12258.1	hypothetical protein UV8b_6857
UV8b_858	JHTR01000003.1	50888	51638	+	949.2	750	242	KDB18010.1	3-ketosteroid reductase
UV8b_3575	JHTR01000015.1	233822	234718	+	1382.1	896	374	KDB15544.1	eukaryotic translation initiation factor 2 alpha subunit
UV8b_7172	JHTR01000054.1	51143	52929	+	3260.6	1786	3792	KDB11943.1	RING finger domain-containing protein
UV8b_5872	JHTR01000033.1	183206	184090	+	1218	884	173	KDB13282.1	serine threonine-protein phosphatase pp2a catalytic subunit
UV8b_1917	JHTR01000007.1	605826	606701	+	1355.3	875	373	KDB17320.1	methyltransferase
UV8b_2412	JHTR01000009.1	571411	572411	+	1810.9	1000	624	KDB16821.1	NAP family protein
UV8b_6042	JHTR01000036.1	62614	64965	+	3486.3	2351	-253	KDB13042.1	putative GCN4 translational repressor GCD14 protein
UV8b_1457	JHTR01000005.1	297052	298653	+	2412.3	1601	909	KDB17573.1	Tubulin alpha chain
UV8b_234	JHTR01000001.1	734624	735510	+	1224.9	886	543	KDB18843.1	L-threo-3-deoxy-hexulosonate aldolase
UV8b_7765	JHTR01000072.1	31984	33237	+	2596.8	1253	512	KDB11372.1	stalk rot protein
UV8b_4367	JHTR01000020.1	355839	356471	+	713.9	632	298	KDB14844.1	pre-mRNA-processing protein prp40
UV8b_7190	JHTR01000054.1	105546	106171	+	883.3	625	562	KDB11961.1	putative PUA RNA binding domain protein
UV8b_5707	JHTR01000032.1	31257	32035	+	1011.6	778	1308	KDB13328.1	hypothetical protein UV8b_5707
UV8b_731	JHTR01000002.1	676351	677354	+	1566.6	1003	404	KDB18489.1	dDENN domain protein
UV8b_4048	JHTR01000018.1	499185	499810	+	837	625	506	KDB15208.1	branched-chain amino acid aminotransferase
UV8b_5470	JHTR01000030.1	144205	145522	+	1935	1317	705	KDB13638.1	60S ribosomal protein L27a
UV8b_4140	JHTR01000019.1	261080	262081	+	1231.7	1001	288	KDB14994.1	Multiprotein-bridging factor 1
UV8b_4596	JHTR01000022.1	428838	430837	+	3685.2	1999	763	KDB14546.1	hypothetical protein UV8b_4596
UV8b_2320	JHTR01000009.1	255433	256568	+	1963.2	1135	562	KDB16729.1	ATP-dependent RNA helicase MSS116 precursor
UV8b_3436	JHTR01000014.1	487712	489104	+	2232	1392	395	KDB15796.1	putative ribosome associated DnaJ chaperone Zuotin
UV8b_4600	JHTR01000022.1	442661	443881	+	1542.8	1220	926	KDB14550.1	hypothetical protein UV8b_4600
UV8b_1020	JHTR01000003.1	592079	592877	+	882.6	798	229	KDB18172.1	hypothetical protein UV8b_1020
UV8b_6542	JHTR01000041.1	289876	290883	+	1464.2	1007	1027	KDB12696.1	forkhead domain-containing protein
UV8b_7622	JHTR01000066.1	169920	171472	+	3116.3	1552	677	KDB11580.1	putative FYVE domain protein
UV8b_4365	JHTR01000020.1	347487	348243	+	1114.7	756	846	KDB14842.1	chromo domain-containing protein 1
UV8b_2284	JHTR01000009.1	144804	146773	+	2972.9	1969	720	KDB16693.1	DUF1339 domain protein
UV8b_3593	JHTR01000015.1	281943	283496	+	2805.8	1553	883	KDB15562.1	HAL protein kinase
UV8b_5136	JHTR01000026.1	477301	478218	+	1147	917	485	KDB14147.1	hypothetical protein UV8b_5136
UV8b_8390	JHTR01000178.1	4363	5568	+	1465.9	1205	332	KDB10764.1	putative bZIP transcription factor
UV8b_1488	JHTR01000005.1	398045	399296	+	2462	1251	471	KDB17604.1	betaine aldehyde dehydrogenase
UV8b_3724	JHTR01000016.1	78335	79924	+	2150.1	1589	854	KDB15298.1	ECM33-like protein
UV8b_7513	JHTR01000063.1	121642	122392	+	1213.1	750	382	KDB11656.1	putative transcription factor TAF25
UV8b_1932	JHTR01000007.1	637187	638417	+	1948.4	1230	752	KDB17335.1	NIMA-interacting protein TinC
UV8b_4931	JHTR01000024.1	486697	489617	+	4786.5	2920	-236	KDB14336.1	thyroid hormone receptor interactor 12
UV8b_3661	JHTR01000015.1	493724	494734	+	1675.8	1010	696	KDB15630.1	hypothetical protein UV8b_3661
UV8b_2261	JHTR01000009.1	67759	69276	+	2337.4	1517	452	KDB16670.1	hypothetical protein UV8b_2261
UV8b_5368	JHTR01000029.1	185746	188266	+	4401.9	2520	1	KDB13761.1	dimethyladenosine transferase dimethyltransferase
UV8b_3063	JHTR01000012.1	458394	458894	+	794.8	500	545	KDB16133.1	putative cAMP-regulated phosphoprotein family protein Igo1
UV8b_566	JHTR01000002.1	198744	202160	+	4512.7	3416	1573	KDB18324.1	guanylate kinase
UV8b_6268	JHTR01000038.1	148712	149212	+	732.2	500	2499	KDB12907.1	putative phosphoesterase
UV8b_6029	JHTR01000036.1	26631	27518	+	487.4	887	170	KDB13029.1	hypercellular protein
UV8b_5405	JHTR01000029.1	374817	375704	+	1214	887	928	KDB13798.1	phosphoglycerate mutase, 2,3-bisphosphoglycerate-independent
UV8b_6773	JHTR01000045.1	134348	135610	+	2066.1	1262	889	KDB12410.1	MSPdomain-containing protein
UV8b_6129	JHTR01000036.1	343252	344639	+	2237.4	1387	445	KDB13129.1	Pex13 protein
UV8b_5184	JHTR01000028.1	82579	83209	+	903.3	630	763	KDB13850.1	iron copper transporter
UV8b_197	JHTR01000001.1	640409	641492	+	1496.9	1083	326	KDB18806.1	cytokinesis protein
UV8b_2105	JHTR01000008.1	364239	366424	+	3374	2185	-160	KDB17013.1	putative mitochondrial carrier protein
UV8b_5485	JHTR01000030.1	183917	184921	+	1589.9	1004	228	KDB13653.1	NADH:ubiquinone oxidoreductase 14kD subunit
UV8b_7288	JHTR01000057.1	128995	129757	+	1025.3	762	281	KDB11865.1	DNA-directed RNA polymerase
UV8b_2233	JHTR01000008.1	810989	812245	+	1850	1256	403	KDB17141.1	RNase H domain protein
UV8b_459	JHTR01000001.1	1972090	1973100	+	1587.8	1010	307	KDB19068.1	TRAF-type zinc finger protein
UV8b_5308	JHTR01000028.1	439576	441502	+	3433.6	1926	1398	KDB13974.1	ammonium permease
UV8b_7046	JHTR01000051.1	47123	48248	+	1589.2	1125	-834	KDB12053.1	malate dehydrogenase
UV8b_5929	JHTR01000034.1	120983	122501	+	2702.5	1518	471	KDB13169.1	methylenetetrahydrofolate reductase 1
UV8b_8342	JHTR01000118.1	20540	21040	+	501.8	500	130	KDB10811.1	NEDD8-activating enzyme E1 catalytic subunit
UV8b_2167	JHTR01000008.1	557281	558562	+	2137.9	1281	613	KDB17075.1	positive regulator of purine utilization
UV8b_1415	JHTR01000005.1	154642	155517	+	1267.7	875	325	KDB17531.1	putative cytoskeleton assembly control protein Sla1
UV8b_2445	JHTR01000009.1	677355	678236	+	1497.2	881	515	KDB16854.1	hypothetical protein UV8b_2445
UV8b_3570	JHTR01000015.1	224838	225465	+	882.2	627	346	KDB15539.1	putative ribosomal protein L23
UV8b_393	JHTR01000001.1	1637285	1638089	+	1165.8	804	416	KDB19002.1	hypothetical protein UV8b_393
UV8b_1619	JHTR01000005.1	805812	807866	+	2656.6	2054	1331	KDB17735.1	2-methylcitrate dehydratase
UV8b_918	JHTR01000003.1	229065	230442	+	2990.4	1377	400	KDB18070.1	transcription elongation factor s-ii
UV8b_5653	JHTR01000031.1	300772	301523	+	760	751	274	KDB13555.1	hypothetical protein UV8b_5653
UV8b_6032	JHTR01000036.1	34956	36082	+	2097.1	1126	705	KDB13032.1	chorismate synthase
UV8b_140	JHTR01000001.1	445795	446798	+	1577.7	1003	615	KDB18749.1	mitochondrial export translocase Oxa1
UV8b_2138	JHTR01000008.1	446484	448168	+	3089.2	1684	982	KDB17046.1	cell lysis protein-like protein
UV8b_3401	JHTR01000014.1	383271	384401	+	1727.1	1130	442	KDB15761.1	putative nitrate assimilation regulatory protein nirA
UV8b_1766	JHTR01000007.1	65351	66478	+	1760.1	1127	813	KDB17169.1	hypothetical protein UV8b_1766
UV8b_7053	JHTR01000051.1	67098	67598	+	625.4	500	2020	KDB12060.1	hypothetical protein UV8b_7053
UV8b_3656	JHTR01000015.1	477211	478109	+	1225.8	898	611	KDB15625.1	glutaminyl-tRNA synthetase
UV8b_2494	JHTR01000009.1	831847	832347	+	704	500	160	KDB16903.1	mitogen activated protein kinase
UV8b_4504	JHTR01000021.1	235447	236072	+	757.4	625	-337	KDB14648.1	small GTP-binding protein YPTI
UV8b_1310	JHTR01000004.1	561065	563248	+	3770.1	2183	817	KDB17943.1	putative trafficking protein particle complex subunit 2
UV8b_4610	JHTR01000022.1	499890	501019	+	2083.7	1129	409	KDB14560.1	DUF1183 domain protein
UV8b_7777	JHTR01000072.1	72037	72537	+	614.5	500	284	KDB11384.1	T-complex protein 1 subunit epsilon
UV8b_4568	JHTR01000021.1	545929	546929	+	1783.4	1000	111	KDB14712.1	putative mitochondrial translation initiation factor
UV8b_2204	JHTR01000008.1	716071	717448	+	3211.4	1377	529	KDB17112.1	putative choline/ethanolamine kinase
UV8b_5006	JHTR01000026.1	43660	44535	+	1322.8	875	331	KDB14017.1	6,7-dimethyl-8-ribityllumazine synthase
UV8b_6293	JHTR01000039.1	13512	14388	+	1239	876	284	KDB12799.1	putative 3-phosphoinositide dependent protein kinase-1 (PDK1)
UV8b_5256	JHTR01000028.1	300750	301250	+	884	500	-70	KDB13922.1	cyclophilin A
UV8b_7982	JHTR01000078.1	72822	74094	+	2257.9	1272	427	KDB11171.1	SIN3 binding protein
UV8b_3787	JHTR01000016.1	291866	292775	+	1380	909	379	KDB15361.1	putative ubiquitin-conjugating enzyme spm2
UV8b_4975	JHTR01000025.1	394088	395092	+	1316.4	1004	461	KDB14185.1	hypothetical protein UV8b_4975
UV8b_2634	JHTR01000010.1	435563	436826	+	1955.7	1263	362	KDB16599.1	E3 ubiquitin-protein ligase MARCH6
UV8b_3763	JHTR01000016.1	213569	214444	+	1231	875	400	KDB15337.1	DUF1604 domain protein
UV8b_1556	JHTR01000005.1	612156	613283	+	1955.7	1127	571	KDB17672.1	SWIB/MDM2 domain protein
UV8b_944	JHTR01000003.1	320505	322622	+	4892.1	2117	1280	KDB18096.1	C6 zinc finger domain protein
UV8b_3356	JHTR01000014.1	233256	234382	+	1804.3	1126	267	KDB15716.1	60S ribosomal protein L31
UV8b_3554	JHTR01000015.1	193850	194852	+	1329.1	1002	264	KDB15523.1	hypothetical protein UV8b_3554
UV8b_1759	JHTR01000007.1	54165	55835	+	2270.8	1670	1357	KDB17162.1	putative MFS transporter
UV8b_993	JHTR01000003.1	505657	506543	+	920.3	886	381	KDB18145.1	DUF1776-domain-containing protein
UV8b_3611	JHTR01000015.1	337163	339984	+	5615.2	2821	989	KDB15580.1	hypothetical protein UV8b_3611
UV8b_4061	JHTR01000019.1	18749	19653	+	1242.7	904	698	KDB14915.1	ring finger domain-containing protein
UV8b_7286	JHTR01000057.1	124863	125871	+	1330.8	1008	611	KDB11863.1	exopolyphosphatase
UV8b_6185	JHTR01000037.1	156594	157853	+	1942.5	1259	287	KDB12983.1	putative DNA repair endonuclease rad2
UV8b_538	JHTR01000001.1	2284316	2285161	+	944.8	845	190	KDB19147.1	WD domain containing protein
UV8b_7702	JHTR01000069.1	108528	109662	+	1988.2	1134	632	KDB11446.1	GATA transcription factor AreB
UV8b_132	JHTR01000001.1	421866	422492	+	945	626	530	KDB18741.1	hypothetical protein UV8b_132
UV8b_3921	JHTR01000017.1	561565	562732	+	1788.6	1167	422	KDB15258.1	allergen asp f4-like protein
UV8b_1722	JHTR01000006.1	684212	685087	+	1448.2	875	240	KDB17465.1	putative RNA polymerase II transcription elongation factor (Ctr9)
UV8b_8319	JHTR01000106.1	4831	5998	+	1657.7	1167	345	KDB10826.1	beta-1,3-glucan synthase catalytic subunit
UV8b_3239	JHTR01000013.1	364538	367021	+	4684.3	2483	944	KDB15927.1	vacuolar protein-sorting protein BRO1
UV8b_6063	JHTR01000036.1	123293	123918	+	717.4	625	111	KDB13063.1	ERV2 protein-like protein
UV8b_5365	JHTR01000029.1	173795	175214	+	2374.2	1419	509	KDB13758.1	putative M protein, serotype 2.1 precursor
UV8b_3073	JHTR01000012.1	498627	499879	+	1946.5	1252	339	KDB16143.1	putative nitrilase family protein (Nit3)
UV8b_947	JHTR01000003.1	327675	330814	+	6633.4	3139	1308	KDB18099.1	putative morphogenesis protein (Msb1)
UV8b_2694	JHTR01000011.1	49723	51083	+	1903.4	1360	1258	KDB16238.1	putative serine/threonine protein kinase
UV8b_4514	JHTR01000021.1	257336	258367	+	1586.4	1031	27	KDB14658.1	putative succinyl-CoA ligase
UV8b_332	JHTR01000001.1	1110510	1111887	+	2830.5	1377	364	KDB18941.1	pre-mRNA splicing factor CEF1
UV8b_832	JHTR01000002.1	1013453	1014750	+	2309.2	1297	516	KDB18590.1	hypothetical protein UV8b_832
UV8b_1459	JHTR01000005.1	301780	302405	+	824.3	625	729	KDB17575.1	signaling related protein
UV8b_7845	JHTR01000074.1	69216	69716	+	660.4	500	203	KDB11316.1	actin
UV8b_208	JHTR01000001.1	664457	666099	+	3151.4	1642	1534	KDB18817.1	hypothetical protein UV8b_208
UV8b_4551	JHTR01000021.1	482721	483753	+	1712.3	1032	1582	KDB14695.1	hypothetical protein UV8b_4551
UV8b_2479	JHTR01000009.1	788601	789228	+	879.1	627	391	KDB16888.1	DnaJ and TPR domain protein
UV8b_1606	JHTR01000005.1	771605	775158	+	5450.4	3553	210	KDB17722.1	ubiquinone biosynthesis protein coq-4
UV8b_3621	JHTR01000015.1	379831	382310	+	5481.5	2479	1099	KDB15590.1	cytochrome P450 oxidoreductase
UV8b_7219	JHTR01000056.1	13183	15522	+	5474.2	2339	916	KDB11894.1	DUF1752-domain-containing protein
UV8b_7879	JHTR01000075.1	62237	63243	+	1574.1	1006	602	KDB11269.1	oxysterol binding protein
UV8b_7902	JHTR01000075.1	128337	129602	+	1767.6	1265	2278	KDB11292.1	Set1 complex component spp1
UV8b_1498	JHTR01000005.1	439183	439981	+	1122.2	798	-23	KDB17614.1	putative PHD finger domain protein
UV8b_5829	JHTR01000032.1	429143	431258	+	2801.4	2115	1016	KDB13450.1	40S ribosomal protein S18
UV8b_6674	JHTR01000044.1	87540	88499	+	1187.9	959	245	KDB12450.1	RING-6 like protein
UV8b_7151	JHTR01000053.1	65067	66069	+	1436.9	1002	275	KDB12008.1	tropomyosin-1
UV8b_6275	JHTR01000038.1	175415	177631	+	4400.2	2216	894	KDB12914.1	hypothetical protein UV8b_6275
UV8b_1086	JHTR01000003.1	785552	786553	+	1385.4	1001	265	KDB18238.1	Isopenicillin N synthase and related dioxygenase
UV8b_4928	JHTR01000024.1	472743	474279	+	2461.7	1536	665	KDB14333.1	exocyst component SEC3
UV8b_1565	JHTR01000005.1	639827	641406	+	2549.5	1579	-772	KDB17681.1	hypothetical protein UV8b_1565
UV8b_4086	JHTR01000019.1	92275	92775	+	633.6	500	-67	KDB14940.1	Poly(A)+ RNA export protein
UV8b_582	JHTR01000002.1	232319	234509	+	2998.8	2190	106	KDB18340.1	40S ribosomal protein S5
UV8b_5740	JHTR01000032.1	143575	148311	+	8826.3	4736	2085	KDB13361.1	histidine kinase 1
UV8b_5038	JHTR01000026.1	153098	153723	+	687.7	625	208	KDB14049.1	putative RWD domain protein (Gir2)
UV8b_2843	JHTR01000011.1	487609	488368	+	1035.4	759	435	KDB16387.1	hypothetical protein UV8b_2843
UV8b_3216	JHTR01000013.1	284529	285407	+	1407.7	878	403	KDB15904.1	Eukaryotic translation initiation factor eIF-5A
UV8b_2184	JHTR01000008.1	640240	642301	+	3416.1	2061	1510	KDB17092.1	rab GDP-dissociation inhibitor
UV8b_1713	JHTR01000006.1	601760	602385	+	950.4	625	162	KDB17456.1	peroxin 3
UV8b_5073	JHTR01000026.1	282438	284050	+	3754.4	1612	1000	KDB14084.1	putative transcriptional activator (PtaC)
UV8b_5578	JHTR01000031.1	71327	71953	+	943.8	626	173	KDB13480.1	arsenite resistance protein Ars2
UV8b_1425	JHTR01000005.1	192581	194230	+	2190.1	1649	-140	KDB17541.1	DUF1674 domain-containing protein
UV8b_6727	JHTR01000044.1	256604	258640	+	3411.2	2036	823	KDB12503.1	hypothetical protein UV8b_6727
UV8b_2511	JHTR01000010.1	10004	12978	+	5029.1	2974	1595	KDB16476.1	putative Na+/H+ antiporter CNH1
UV8b_1424	JHTR01000005.1	188669	190729	+	3860.3	2060	1301	KDB17540.1	golgi integral membrane protein
UV8b_6223	JHTR01000038.1	2852	4057	+	1983.5	1205	602	KDB12862.1	lipase
UV8b_4503	JHTR01000021.1	231419	232428	+	1597	1009	1645	KDB14647.1	hypothetical protein UV8b_4503
UV8b_7439	JHTR01000061.1	115200	116076	+	1376.4	876	225	KDB11730.1	ankyrin repeat protein
UV8b_5675	JHTR01000031.1	367792	368683	+	860	891	590	KDB13577.1	20S proteasome subunit
UV8b_1756	JHTR01000007.1	30012	32000	+	3365.3	1988	1924	KDB17159.1	putative 2-dehydropantoate 2-reductase
UV8b_2185	JHTR01000008.1	643609	644611	+	1642.9	1002	296	KDB17093.1	50S ribosomal protein L4
UV8b_2205	JHTR01000008.1	721740	722631	+	1173.5	891	-630	KDB17113.1	hypothetical protein UV8b_2205
UV8b_5757	JHTR01000032.1	196437	198223	+	3052.3	1786	740	KDB13378.1	60S acidic ribosomal protein P0
UV8b_6833	JHTR01000046.1	158345	159415	+	1241.8	1070	746	KDB12346.1	ubiquitin carboxyl-terminal hydrolase
UV8b_5210	JHTR01000028.1	164190	164945	+	1198	755	775	KDB13876.1	charged multivesicular body protein 3
UV8b_2281	JHTR01000009.1	135457	136720	+	2234.4	1263	302	KDB16690.1	nuclear polyadenylated RNA-binding protein Nab2
UV8b_1965	JHTR01000007.1	768858	770662	+	3182.9	1804	989	KDB17368.1	casein kinase I isoform epsilon
UV8b_2013	JHTR01000008.1	50816	52067	+	2183.5	1251	694	KDB16921.1	electron transfer flavoprotein alpha-subunit
UV8b_3737	JHTR01000016.1	120600	121607	+	1640.8	1007	663	KDB15311.1	transcription factor c2h2
UV8b_3005	JHTR01000012.1	277068	277844	+	1054	776	510	KDB16075.1	putative vacuolar ATPase subunit c
UV8b_7370	JHTR01000059.1	78123	79126	+	1808.8	1003	233	KDB11782.1	pre-mRNA-splicing factor CWC25
UV8b_3675	JHTR01000015.1	527991	528788	+	1236.4	797	1191	KDB15644.1	hypothetical protein UV8b_3675
UV8b_2345	JHTR01000009.1	344773	346077	+	2077.1	1304	3838	KDB16754.1	cytochrome P450 78A3
UV8b_6258	JHTR01000038.1	99095	100400	+	1988.9	1305	-187	KDB12897.1	hypothetical protein UV8b_6258
UV8b_4305	JHTR01000020.1	188090	189217	+	1467.8	1127	170	KDB14782.1	double-strand-break repair protein rad21
UV8b_273	JHTR01000001.1	835204	835954	+	1107.4	750	504	KDB18882.1	formate dehydrogenase
UV8b_7205	JHTR01000054.1	155484	157008	+	2513	1524	398	KDB11976.1	serine/threonine-protein kinase prp4
UV8b_2784	JHTR01000011.1	296815	297690	+	1367.3	875	381	KDB16328.1	ATP synthase delta chain precursor
UV8b_2092	JHTR01000008.1	333563	334441	+	1297.8	878	279	KDB17000.1	putative glycerol:H+ symporter (Gup1)
UV8b_221	JHTR01000001.1	706697	707991	+	1733	1294	-46	KDB18830.1	pre-mRNA splicing factor cwc2
UV8b_8012	JHTR01000079.1	109468	110094	+	862.9	626	234	KDB11150.1	protein transport protein sec22
UV8b_415	JHTR01000001.1	1715173	1716175	+	1472.7	1002	211	KDB19024.1	conserved glutamic acid-rich protein

## Sheet: Table S3
Table S3 Up-regulated genes in the ∆Uvkmt2 mutant
Gene ID	baseMean	log2FoldChange	lfcSE	stat	pvalue	padj	Protein product	Protein Name
UV8b_3	225.936	1.67696	0.195374	5.02093	5.14218e-07	1.78043e-06	KDB18612.1	hypothetical protein UV8b_3
UV8b_5	44.9786	3.16498	0.309371	5.98438	2.17216e-09	9.82751e-09	KDB18614.1	hypothetical protein UV8b_5
UV8b_7	287.036	1.17141	0.152403	4.4962	6.91788e-06	2.08882e-05	KDB18616.1	heterokaryon incompatibility protein or allele
UV8b_8	129.342	3.72421	0.210749	10.337	4.79189e-25	6.52865e-24	KDB18617.1	67 kDa myosin-cross-reactive antigen family protein
UV8b_9	2496.83	1.56896	0.180885	5.07385	3.89853e-07	1.36448e-06	KDB18618.1	putative ribosomal protein YmL35
UV8b_10	1458.63	1.64024	0.148337	6.46823	9.91573e-11	5.09405e-10	KDB18619.1	60S ribosomal protein L4 precursor
UV8b_12	42.9829	1.14619	0.338361	1.98155	0.0475293	0.0736542	KDB18621.1	hypothetical protein UV8b_12
UV8b_13	2947.56	1.01102	0.249162	2.3736	0.0176156	0.0300553	KDB18622.1	NADH:ubiquinone oxidoreductase kD subunit
UV8b_16	842.964	1.50464	0.144705	6.08242	1.18383e-09	5.4985e-09	KDB18625.1	porphobilinogen deaminase
UV8b_17	3424.39	1.22021	0.164785	4.33156	1.48056e-05	4.25286e-05	KDB18626.1	putative glycine cleavage system H protein
UV8b_24	3227.25	1.3002	0.130201	5.84147	5.17423e-09	2.25572e-08	KDB18633.1	formyltetrahydrofolate deformylase
UV8b_28	72.3703	4.63307	0.29966	9.04415	1.50829e-19	1.49739e-18	KDB18637.1	cholesterol oxidase
UV8b_29	420.304	10.7833	0.314888	20.032	2.89694e-89	2.92451e-87	KDB18638.1	putative amino acid transporter
UV8b_30	4864.54	9.15445	0.121864	43.9426	0	0	KDB18639.1	CobW/HypB/UreG, nucleotide-binding domain containing protein
UV8b_31	1840.46	1.29449	0.125465	6.03537	1.58601e-09	7.28175e-09	KDB18640.1	hypothetical protein UV8b_31
UV8b_32	732.778	1.70641	0.178987	5.57688	2.44871e-08	9.97461e-08	KDB18641.1	cytosolic Fe-S cluster assembling factor cfd1
UV8b_35	1065.08	2.51509	0.156446	9.40408	5.24849e-21	5.74113e-20	KDB18644.1	protein kinase domain-containing protein
UV8b_36	433.631	1.64481	0.21789	4.41577	1.00649e-05	2.96533e-05	KDB18645.1	hypothetical protein UV8b_36
UV8b_39	5905.94	1.7829	0.147445	7.07333	1.51264e-12	9.22447e-12	KDB18648.1	arg-6 protein precursor
UV8b_60	75.9535	1.68463	0.244917	4.02359	5.73169e-05	0.000150457	KDB18669.1	hypothetical protein UV8b_60
UV8b_61	122.231	1.46514	0.201082	4.26222	2.02405e-05	5.68729e-05	KDB18670.1	hypothetical protein UV8b_61
UV8b_62	151.021	2.41491	0.193218	7.31108	2.64997e-13	1.70932e-12	KDB18671.1	hypothetical protein UV8b_62
UV8b_63	616.58	1.82613	0.144822	7.37608	1.63017e-13	1.06215e-12	KDB18672.1	oligopeptide transporter
UV8b_64	159.73	2.35161	0.182832	7.52389	5.317e-14	3.5584e-13	KDB18673.1	metallo-beta-lactamase superfamily protein domain-containing protein
UV8b_65	246.024	4.22103	0.269956	9.14649	5.88132e-20	6.03177e-19	KDB18674.1	hypothetical protein UV8b_65
UV8b_66	740.809	3.52815	0.285976	7.21682	5.32182e-13	3.36286e-12	KDB18675.1	hypothetical protein UV8b_66
UV8b_67	1085.29	1.96692	0.14924	7.70955	1.26264e-14	8.95065e-14	KDB18676.1	hypothetical protein UV8b_67
UV8b_78	2086.29	1.32334	0.191152	4.04967	5.12897e-05	0.000135613	KDB18687.1	hypothetical protein UV8b_78
UV8b_83	110.726	1.43316	0.209775	3.9964	6.43137e-05	0.000168034	KDB18692.1	transcriptional regulator
UV8b_94	730.386	1.30677	0.178824	4.27466	1.91432e-05	5.41712e-05	KDB18703.1	translation initiation factor
UV8b_99	9.43441	7.11095	0.977797	4.25409	2.099e-05	5.88604e-05	KDB18708.1	hypothetical protein UV8b_99
UV8b_107	1872.81	2.82707	0.158728	10.4187	2.03796e-25	2.84601e-24	KDB18716.1	hypothetical protein UV8b_107
UV8b_108	62.041	1.41536	0.254771	3.24971	0.00115523	0.00246867	KDB18717.1	S-(hydroxymethyl)glutathione dehydrogenase
UV8b_114	1768.62	1.15883	0.105414	6.43058	1.27115e-10	6.43176e-10	KDB18723.1	putative glycosyl hydrolase
UV8b_120	752.557	1.78295	0.114745	9.08938	9.96066e-20	9.99526e-19	KDB18729.1	monoamine oxidase n
UV8b_121	1127.99	2.67552	0.124312	12.5899	2.40052e-36	5.37805e-35	KDB18730.1	choline transport protein
UV8b_123	570.379	2.03599	0.223266	5.33434	9.58938e-08	3.63079e-07	KDB18732.1	hypothetical protein UV8b_123
UV8b_129	7812.96	1.14676	0.19864	3.37702	0.000732755	0.00162299	KDB18738.1	60s ribosomal protein l38
UV8b_139	5138.77	1.27698	0.0937892	7.96452	1.65862e-15	1.25884e-14	KDB18748.1	urg3
UV8b_156	821.237	1.6489	0.104054	9.26965	1.86758e-20	1.98584e-19	KDB18765.1	putative PET127
UV8b_160	2926.9	1.10538	0.12823	5.04254	4.59401e-07	1.59922e-06	KDB18769.1	hypothetical protein UV8b_160
UV8b_178	4110.9	2.32459	0.0887833	15.3159	5.98333e-53	2.66672e-51	KDB18787.1	putative 3-hydroxyisobutyryl-CoA hydrolase precursor
UV8b_188	4181.93	2.7652	0.126117	12.8257	1.17696e-37	2.78581e-36	KDB18797.1	Farnesyl pyrophosphate synthetase
UV8b_191	2858.36	1.7128	0.126386	7.9275	2.23595e-15	1.6848e-14	KDB18800.1	putative proteasome subunit alpha
UV8b_193	1936.38	3.2866	0.13537	14.2021	8.88703e-46	2.79941e-44	KDB18802.1	hypothetical protein UV8b_193
UV8b_194	1420.75	1.937	0.194177	5.83525	5.37098e-09	2.33905e-08	KDB18803.1	glucosidase I
UV8b_195	1380.18	1.22551	0.11133	6.43917	1.20126e-10	6.11132e-10	KDB18804.1	u4 tri-snRNP-associated protein 3
UV8b_211	657.375	1.31501	0.221801	3.46813	0.000524098	0.00118815	KDB18820.1	hypothetical protein UV8b_211
UV8b_215	836.909	1.15475	0.138658	4.87158	1.10708e-06	3.67812e-06	KDB18824.1	hypothetical protein UV8b_215
UV8b_218	646.233	1.22496	0.234949	3.04983	0.00228974	0.00466013	KDB18827.1	spo12-like protein
UV8b_254	8810.62	2.25285	0.156661	8.41203	4.02961e-17	3.45589e-16	KDB18863.1	periplasmic binding ii
UV8b_265	7557.29	2.28391	0.107973	12.3735	3.63679e-35	7.63726e-34	KDB18874.1	vacuolar aspartyl aminopeptidase Lap4
UV8b_266	3963.69	3.15887	0.126349	14.6248	1.95266e-48	6.93279e-47	KDB18875.1	short-chain dehydrogenase
UV8b_275	2945.15	1.47696	0.266235	3.24511	0.00117404	0.00250541	KDB18884.1	DUF1754-domain-containing protein
UV8b_276	3469.46	1.29783	0.126878	5.98356	2.18307e-09	9.87154e-09	KDB18885.1	hypothetical protein UV8b_276
UV8b_278	6683.54	1.00647	0.224996	2.61669	0.00887861	0.0161445	KDB18887.1	Dynein heavy chain, cytoplasmic
UV8b_279	296.805	2.6421	0.167701	9.21595	3.08522e-20	3.23138e-19	KDB18888.1	putative Mutator-like element transposase
UV8b_280	747.687	3.15892	0.20508	9.01039	2.0533e-19	2.01695e-18	KDB18889.1	hypothetical protein UV8b_280
UV8b_295	1736.71	1.62588	0.214366	4.43671	9.13451e-06	2.71123e-05	KDB18904.1	mannosyltransferase
UV8b_296	1992.27	2.4582	0.0969504	14.8319	9.11466e-50	3.44017e-48	KDB18905.1	hypothetical protein UV8b_296
UV8b_300	2862.11	2.23963	0.147206	8.89976	5.59698e-19	5.37195e-18	KDB18909.1	histidinol-phosphate aminotransferase
UV8b_305	981.287	1.00206	0.207709	2.82205	0.00477171	0.00916182	KDB18914.1	putative ras-like GTP-binding protein
UV8b_309	1803.57	1.03644	0.144929	4.18327	2.87344e-05	7.88619e-05	KDB18918.1	profilin
UV8b_312	943.39	1.10713	0.225259	2.87503	0.0040399	0.0078539	KDB18921.1	DASH complex subunit DAD4
UV8b_313	2561.66	1.72278	0.10673	9.44218	3.65095e-21	4.04647e-20	KDB18922.1	putative chromatin remodeling complex subunit (Arp5)
UV8b_322	1245.74	1.25147	0.121105	6.04487	1.49526e-09	6.87262e-09	KDB18931.1	mitochondrial import receptor subunit tom-20
UV8b_326	1385.65	1.05494	0.202478	3.04773	0.00230579	0.00469165	KDB18935.1	SH3 domain containing protein
UV8b_348	1227.15	4.49346	0.117136	22.4398	1.61038e-111	2.69867e-109	KDB18957.1	hypothetical protein UV8b_348
UV8b_351	3047.8	2.87156	0.199643	8.41379	3.9696e-17	3.41141e-16	KDB18960.1	elongation factor G 1 precursor
UV8b_352	3070.54	1.18699	0.134946	5.14537	2.66997e-07	9.57692e-07	KDB18961.1	putative SMC1 protein
UV8b_354	318.746	2.29652	0.159303	8.43287	3.3729e-17	2.91958e-16	KDB18963.1	DNA polymerase beta
UV8b_359	2811.68	2.44948	0.181197	7.90771	2.62175e-15	1.96843e-14	KDB18968.1	alcohol dehydrogenase
UV8b_360	937.994	2.08214	0.177361	6.8672	6.54726e-12	3.7756e-11	KDB18969.1	hypothetical protein UV8b_360
UV8b_364	2601.49	1.30067	0.115566	6.5836	4.59185e-11	2.43359e-10	KDB18973.1	ATP-dependent permease MDL2
UV8b_388	1092.05	2.29814	0.124188	10.8249	2.62265e-27	4.03214e-26	KDB18997.1	hypothetical protein UV8b_388
UV8b_389	395.634	1.41824	0.132175	6.27667	3.45897e-10	1.69193e-09	KDB18998.1	mitochondrial oxaloacetate transport protein
UV8b_390	200.648	1.33769	0.169302	4.6219	3.80236e-06	1.18394e-05	KDB18999.1	mitochondrial oxaloacetate transport protein
UV8b_407	7222.06	1.81803	0.103349	10.2902	7.80224e-25	1.05614e-23	KDB19016.1	hypothetical protein UV8b_407
UV8b_408	21819.5	6.016	0.148518	23.695	4.05656e-124	7.72498e-122	KDB19017.1	eukaryotic translation initiation factor 6
UV8b_411	2111.8	2.33075	0.169001	8.06743	7.17921e-16	5.54932e-15	KDB19020.1	phenylalanyl-tRNA synthetase, beta subunit
UV8b_413	9476.05	1.02087	0.0909617	6.56511	5.19933e-11	2.74513e-10	KDB19022.1	putative 40S ribosomal protein S3
UV8b_433	15299	1.67106	0.202764	4.82089	1.42918e-06	4.67048e-06	KDB19042.1	pyruvate dehydrogenase E1 component alpha subunit
UV8b_435	856.62	1.60763	0.161638	5.81797	5.95676e-09	2.58075e-08	KDB19044.1	hypothetical protein UV8b_435
UV8b_436	166.912	1.73433	0.193966	5.2304	1.69148e-07	6.21345e-07	KDB19045.1	hypothetical protein UV8b_436
UV8b_438	9460.5	1.29906	0.225643	3.36772	0.000757927	0.00167476	KDB19047.1	calmodulin
UV8b_440	1480.41	1.05082	0.0981318	6.26395	3.75351e-10	1.83172e-09	KDB19049.1	hypothetical protein UV8b_440
UV8b_447	6290.72	1.47287	0.124514	6.9195	4.53252e-12	2.64655e-11	KDB19056.1	putative protein-tyrosine-phosphatase
UV8b_448	5810.07	1.96499	0.16866	6.81516	9.41571e-12	5.35966e-11	KDB19057.1	meiotic chromosome segregation protein
UV8b_449	3039.19	1.66018	0.118374	8.20398	2.3256e-16	1.88637e-15	KDB19058.1	26S protease regulatory subunit 8
UV8b_451	3230.9	2.51054	0.10115	14.5188	9.20906e-48	3.124e-46	KDB19060.1	peroxin 22-like protein
UV8b_469	1718.38	1.37162	0.139894	5.73538	9.72955e-09	4.1488e-08	KDB19078.1	kynurenine-oxoglutarate transaminase
UV8b_470	1674.71	1.41235	0.14085	5.86563	4.47422e-09	1.96795e-08	KDB19079.1	kynurenine-oxoglutarate transaminase 1
UV8b_471	1457.38	1.21676	0.130501	5.45404	4.9239e-08	1.93696e-07	KDB19080.1	kynurenine-oxoglutarate transaminase
UV8b_475	8311.99	1.16092	0.112904	6.01479	1.80116e-09	8.22447e-09	KDB19084.1	ribonuclease Z
UV8b_484	3185.99	3.10579	0.270026	6.72813	1.71861e-11	9.56424e-11	KDB19093.1	50S ribosomal protein YmL27
UV8b_489	2801.14	1.32915	0.16806	4.62636	3.72152e-06	1.1605e-05	KDB19098.1	AP-1-like protein
UV8b_498	575.016	2.95378	0.26071	6.62749	3.4145e-11	1.83123e-10	KDB19107.1	hypothetical protein UV8b_498
UV8b_500	1887.09	1.84565	0.0913943	11.813	3.34573e-32	6.25757e-31	KDB19109.1	hypothetical protein UV8b_500
UV8b_506	2736.1	1.38916	0.138965	5.84758	4.98786e-09	2.179e-08	KDB19115.1	putative secretory pathway protein Ssp120
UV8b_523	864.741	1.08945	0.137031	4.6507	3.30817e-06	1.03584e-05	KDB19132.1	pentatricopeptide repeat domain-containing protein
UV8b_525	479.623	1.91662	0.195179	5.74423	9.23405e-09	3.94957e-08	KDB19134.1	hypothetical protein UV8b_525
UV8b_526	8165.77	3.19014	0.143179	13.0334	7.89899e-39	1.97569e-37	KDB19135.1	zinc finger protein zpr1
UV8b_530	43.8138	3.09677	0.317691	5.70207	1.18364e-08	4.98879e-08	KDB19139.1	hypothetical protein UV8b_530
UV8b_544	7223.81	3.07597	0.112463	15.9993	1.29144e-57	6.63862e-56	KDB19153.1	hydroxymethylglutaryl-CoA synthase
UV8b_545	10.7772	5.2234	0.726693	4.20465	2.61483e-05	7.22137e-05	KDB18303.1	methyltransferase type 11
UV8b_547	734.701	1.28784	0.127137	5.92544	3.11463e-09	1.39335e-08	KDB18305.1	Ribonuclease H2 subunit A
UV8b_552	7484.96	4.91096	0.183588	15.6477	3.44335e-55	1.67743e-53	KDB18310.1	hypothetical protein UV8b_552
UV8b_553	3470.93	1.02314	0.124472	4.8083	1.52216e-06	4.96851e-06	KDB18311.1	Mitochondrial escape protein 2
UV8b_554	3013.53	1.04072	0.115852	5.25484	1.48149e-07	5.48061e-07	KDB18312.1	hypothetical protein UV8b_554
UV8b_565	1092.96	1.15908	0.0957738	7.07936	1.44823e-12	8.84453e-12	KDB18323.1	mitochondrial genome maintenance protein MGM101
UV8b_567	7003.56	1.85701	0.152658	7.1158	1.11267e-12	6.85518e-12	KDB18325.1	cell division control protein 10
UV8b_570	1217.83	1.38629	0.142342	5.69705	1.21899e-08	5.13006e-08	KDB18328.1	DNA polymerase delta subunit 4
UV8b_575	981.625	1.16557	0.110571	6.16629	6.99095e-10	3.31694e-09	KDB18333.1	activator 1 subunit 3
UV8b_577	1354.22	2.09335	0.14732	8.31204	9.40685e-17	7.882e-16	KDB18335.1	hypothetical protein UV8b_577
UV8b_580	84947.4	3.08265	0.0842431	21.4051	1.19796e-101	1.59328e-99	KDB18338.1	ADP,ATP carrier protein
UV8b_584	8239.45	1.30325	0.145419	5.24245	1.5846e-07	5.84649e-07	KDB18342.1	putative dock180 protein
UV8b_596	5580.18	1.47186	0.111669	7.71013	1.2569e-14	8.91747e-14	KDB18354.1	leucyl-tRNA synthetase
UV8b_598	2942.35	1.61643	0.109409	8.64233	5.50758e-18	4.96215e-17	KDB18356.1	AP-3 complex subunit sigma
UV8b_600	1716.13	1.34686	0.196199	4.01564	5.92858e-05	0.000155382	KDB18358.1	mitochondrial carrier protein
UV8b_603	8806.69	1.16196	0.189024	3.59584	0.000323344	0.000755733	KDB18361.1	60S ribosomal protein L25
UV8b_605	2323.99	1.81336	0.179432	5.91168	3.38631e-09	1.50845e-08	KDB18363.1	4-hydroxyphenylpyruvate dioxygenase
UV8b_606	2323.99	2.26645	0.137206	9.66277	4.33971e-22	5.05736e-21	KDB18364.1	hypothetical protein UV8b_606
UV8b_610	5325.56	1.85653	0.104829	10.3597	3.78181e-25	5.16088e-24	KDB18368.1	UDP-galactopyranose mutase
UV8b_623	757.942	2.8991	0.14644	11.5807	5.16492e-31	9.16883e-30	KDB18381.1	DUF1168 domain protein
UV8b_624	5002.56	1.38366	0.0918372	8.81331	1.21499e-18	1.14002e-17	KDB18382.1	T-complex protein 1 subunit gamma
UV8b_625	9736.38	1.16763	0.26957	2.53373	0.0112856	0.0201068	KDB18383.1	rapamycin binding protein FKBP12
UV8b_628	6233.62	3.34533	0.0874078	22.3881	5.14551e-111	8.45377e-109	KDB18386.1	glutathione-disulfide reductase
UV8b_629	5165.05	1.83783	0.239181	4.49476	6.9647e-06	2.10145e-05	KDB18387.1	EF hand domain protein
UV8b_630	127.212	7.52922	0.317169	13.8863	7.66808e-44	2.27035e-42	KDB18388.1	cellobiose dehydrogenase
UV8b_634	1398.41	1.56755	0.20221	4.53469	5.76895e-06	1.76095e-05	KDB18392.1	DENN domain-containing protein
UV8b_639	3532.02	1.56745	0.178369	5.14047	2.74048e-07	9.80047e-07	KDB18397.1	ribonucleoside-diphosphate reductase large chain
UV8b_645	3041.54	1.48167	0.113365	7.64543	2.08256e-14	1.44572e-13	KDB18403.1	aminotransferase
UV8b_654	1325.36	1.67833	0.137198	7.15582	8.31734e-13	5.18149e-12	KDB18412.1	putative iron transferase
UV8b_655	79.8373	1.41156	0.21771	3.79272	0.000149006	0.000368173	KDB18413.1	protein phosphatase 2c domain containing protein
UV8b_657	2616.46	2.0538	0.193344	6.21376	5.17301e-10	2.49251e-09	KDB18415.1	putative CDP-diacylglycerol--inositol 3-phosphatidyltransferase
UV8b_659	488.902	1.34969	0.132366	5.96466	2.45139e-09	1.1055e-08	KDB18417.1	orotidine-5\\'-phosphate decarboxylase
UV8b_662	1221.85	1.91586	0.11088	10.1074	5.12113e-24	6.6734e-23	KDB18420.1	signal recognition particle protein Sec65
UV8b_668	1488.46	1.51966	0.208279	4.26804	1.97197e-05	5.55773e-05	KDB18426.1	transcription initiation factor TFIID subunit 13
UV8b_674	1571.33	2.30502	0.117231	11.5017	1.29376e-30	2.23975e-29	KDB18432.1	hypothetical protein UV8b_674
UV8b_681	5561.17	1.05452	0.0891911	6.91608	4.64315e-12	2.70549e-11	KDB18439.1	NADH-ubiquinone oxidoreductase 78 kDa subunit
UV8b_687	311.478	1.38734	0.163598	4.96059	7.02808e-07	2.39092e-06	KDB18445.1	ubiquitin supergroup
UV8b_688	1274.25	1.15078	0.151144	4.45381	8.43592e-06	2.51457e-05	KDB18446.1	ubiquitin supergroup
UV8b_689	39270.5	2.86373	0.116607	14.3659	8.46477e-47	2.77056e-45	KDB18447.1	Heat shock protein 60 precursor (Antigen HIS-62)
UV8b_691	76.1621	2.37305	0.301984	4.59675	4.29132e-06	1.32682e-05	KDB18449.1	hypothetical protein UV8b_691
UV8b_693	341.055	1.10378	0.130984	4.92941	8.24794e-07	2.78555e-06	KDB18451.1	hypothetical protein UV8b_693
UV8b_699	584.52	1.2651	0.129979	5.69352	1.24448e-08	5.23206e-08	KDB18457.1	Lin1 family protein
UV8b_700	26184.3	1.0225	0.0853146	7.0108	2.36965e-12	1.41722e-11	KDB18458.1	glyceraldehyde-3-phosphate dehydrogenase
UV8b_708	1680.59	2.08914	0.181573	6.73045	1.69134e-11	9.42271e-11	KDB18466.1	transport protein
UV8b_711	4756.1	1.33485	0.195308	3.99796	6.38911e-05	0.000167086	KDB18469.1	hypothetical protein UV8b_711
UV8b_712	8932.25	1.37513	0.223978	3.59142	0.000328879	0.000768241	KDB18470.1	cytochrome c oxidase polypeptide VIb
UV8b_718	1941.81	2.1122	0.188968	6.53846	6.21538e-11	3.2468e-10	KDB18476.1	putative ribosomal protein MRP49
UV8b_719	1811.97	1.65907	0.120013	8.08652	6.13914e-16	4.78065e-15	KDB18477.1	protein phosphatase inhibitor
UV8b_726	3038.33	2.13651	0.154755	8.07588	6.69943e-16	5.19283e-15	KDB18484.1	putative ornithine carbamoyl transferase
UV8b_727	3532.95	1.44243	0.121442	6.94792	3.70712e-12	2.17673e-11	KDB18485.1	acetolactate synthase small subunit precursor
UV8b_730	741.417	2.0153	0.144544	8.15584	3.46774e-16	2.76463e-15	KDB18488.1	ring finger domain protein
UV8b_738	962.138	2.04203	0.107908	11.0697	1.75968e-28	2.78722e-27	KDB18496.1	C6 transcription factor
UV8b_739	15805	1.79169	0.0905377	11.5761	5.44719e-31	9.62912e-30	KDB18497.1	60S ribosomal protein L3
UV8b_746	642.587	1.46259	0.150986	5.66649	1.45754e-08	6.08379e-08	KDB18504.1	activator 1 38 kDa subunit
UV8b_747	1581.97	1.03443	0.133629	4.52821	5.94843e-06	1.81375e-05	KDB18505.1	60S ribosomal protein L16 precursor
UV8b_754	235.288	1.0452	0.144079	4.24354	2.20022e-05	6.13295e-05	KDB18512.1	NADP:D-xylose dehydrogenase
UV8b_757	1.49748	6.9117	1.82057	2.22078	0.0263659	0.0432074	KDB18515.1	hypothetical protein UV8b_757
UV8b_758	489.593	1.77214	0.20022	5.17747	2.24913e-07	8.13006e-07	KDB18516.1	tubulin specific chaperone cofactor B
UV8b_759	598.273	1.19629	0.161324	4.33778	1.43931e-05	4.13864e-05	KDB18517.1	tubulin specific chaperone cofactor B
UV8b_764	7046.88	1.43619	0.214113	3.92373	8.71896e-05	0.000223687	KDB18522.1	Mitochondrial ATP synthase epsilon chain domain-containing protein
UV8b_765	729.721	1.20577	0.129644	5.44049	5.31332e-08	2.08136e-07	KDB18523.1	putative amino-acid N-acetyltransferase subunit Mak10
UV8b_768	2625.34	1.28923	0.115868	6.50874	7.5782e-11	3.92931e-10	KDB18526.1	26S proteasome non-ATPase regulatory subunit 11
UV8b_769	2108.79	2.09851	0.100728	12.1867	3.65811e-34	7.45774e-33	KDB18527.1	mitochondrial co-chaperone GrpE
UV8b_773	36.6478	1.71969	0.339994	2.95875	0.00308891	0.00613257	KDB18531.1	sam domain containing protein
UV8b_786	3337.33	1.62422	0.251832	3.77277	0.000161443	0.000397045	KDB18544.1	Arp2/3 complex subunit
UV8b_790	2850.4	1.62235	0.175689	5.40167	6.6025e-08	2.55412e-07	KDB18548.1	pathogenicity protein
UV8b_791	790.013	1.85887	0.134187	8.10336	5.34637e-16	4.1945e-15	KDB18549.1	hypothetical protein UV8b_791
UV8b_792	1784.75	1.2092	0.147718	4.78842	1.68103e-06	5.451e-06	KDB18550.1	hypothetical protein UV8b_792
UV8b_812	1521.35	1.3121	0.143586	5.34544	9.01989e-08	3.43067e-07	KDB18570.1	hypothetical protein UV8b_812
UV8b_816	9457.89	1.9634	0.258667	4.44013	8.99057e-06	2.67135e-05	KDB18574.1	ABC transporter ABCl1
UV8b_821	117.473	2.28959	0.267086	5.01457	5.31518e-07	1.83805e-06	KDB18579.1	hypothetical protein UV8b_821
UV8b_822	850.421	1.9622	0.113305	10.1303	4.05347e-24	5.2986e-23	KDB18580.1	s-adenosyl-l-methionine-dependent methyltransferase
UV8b_843	5387.33	3.14202	0.122854	14.9606	1.32903e-50	5.37968e-49	KDB18601.1	cytochrome c heme lyase
UV8b_856	2882.71	1.38476	0.160359	5.05138	4.38624e-07	1.52816e-06	KDB18008.1	ubiquinol-cytochrome c reductase complex 17 kd protein
UV8b_858	1961.62	1.62875	0.14534	6.55536	5.55076e-11	2.92331e-10	KDB18010.1	3-ketosteroid reductase
UV8b_879	3291.35	2.1992	0.0911962	14.1064	3.46949e-45	1.0767e-43	KDB18031.1	branched-chain amino acid aminotransferase, cytosolic
UV8b_881	581.004	1.23221	0.17203	4.18995	2.79012e-05	7.67007e-05	KDB18033.1	putative histone deacetylase SIR2
UV8b_888	702.616	2.23134	0.159086	8.20467	2.31225e-16	1.87736e-15	KDB18040.1	ribonuclease subunit b
UV8b_893	598.62	1.02376	0.150978	3.96655	7.29193e-05	0.00018922	KDB18045.1	spermine/spermidine synthase
UV8b_894	2531.33	1.06276	0.0917781	6.77367	1.25556e-11	7.07964e-11	KDB18046.1	flavin-nucleotide-binding protein
UV8b_900	8929.28	2.26268	0.130249	10.1619	2.93181e-24	3.8686e-23	KDB18052.1	beta-tubulin
UV8b_901	2188.62	1.17424	0.189015	3.63404	0.000279018	0.000658376	KDB18053.1	3\\'-phosphoadenosine 5\\'-phosphatase isoform A
UV8b_908	2864.22	1.23969	0.268215	2.7037	0.00685721	0.0127767	KDB18060.1	DNA-directed RNA polymerases I/II/III subunit 10
UV8b_909	1632.15	1.20508	0.107629	6.5496	5.7691e-11	3.03067e-10	KDB18061.1	WD repeat-containing protein 75
UV8b_913	3578.21	1.08161	0.251775	2.51296	0.0119724	0.0212087	KDB18065.1	receptor-associated protein
UV8b_920	3281.11	1.01911	0.205937	2.89477	0.00379431	0.00740911	KDB18072.1	COG1565 domain protein
UV8b_922	12280.4	1.60872	0.119136	7.89893	2.8131e-15	2.10831e-14	KDB18074.1	hypothetical protein UV8b_922
UV8b_932	5076.36	2.03861	0.200607	5.9445	2.77303e-09	1.24519e-08	KDB18084.1	NADH-cytochrome b5 reductase
UV8b_934	723.821	1.29314	0.148586	5.09089	3.56382e-07	1.25274e-06	KDB18086.1	hypothetical protein UV8b_934
UV8b_940	8718.11	1.42879	0.0906456	9.22041	2.95962e-20	3.1076e-19	KDB18092.1	heat shock protein 70
UV8b_948	816.774	2.03261	0.126406	9.40621	5.1435e-21	5.65583e-20	KDB18100.1	uracil-DNA glycosylase
UV8b_950	18.1891	2.6893	0.47873	3.28606	0.00101598	0.00219858	KDB18102.1	hypothetical protein UV8b_950
UV8b_953	205.508	4.97097	0.211716	13.7346	6.30221e-43	1.81518e-41	KDB18105.1	hypothetical protein UV8b_953
UV8b_954	505.186	1.28991	0.127743	5.90679	3.48844e-09	1.54661e-08	KDB18106.1	hypothetical protein UV8b_954
UV8b_955	71.6109	2.62723	0.327364	4.69456	2.67175e-06	8.43187e-06	KDB18107.1	hypothetical protein UV8b_955
UV8b_956	232.534	3.07939	0.198163	9.09013	9.89196e-20	9.93821e-19	KDB18108.1	hypothetical protein UV8b_956
UV8b_961	2966.9	1.69945	0.160919	6.17774	6.50251e-10	3.09571e-09	KDB18113.1	putative ATPase family protein
UV8b_968	3592.66	3.75895	0.101932	21.5717	3.31231e-103	4.54982e-101	KDB18120.1	membrane zinc transporter
UV8b_969	15558.8	1.45318	0.23113	3.67783	0.000235226	0.000563132	KDB18121.1	40S ribosomal protein S19
UV8b_974	96.1848	2.14187	0.291723	4.29488	1.74788e-05	4.96964e-05	KDB18126.1	hypothetical protein UV8b_974
UV8b_977	1936.14	1.15309	0.151216	4.4606	8.17308e-06	2.4423e-05	KDB18129.1	putative mitochondrial processing peptidase alpha subunit
UV8b_980	2294.07	2.28601	0.175208	7.63225	2.30683e-14	1.59348e-13	KDB18132.1	myosin type II heavy chain
UV8b_985	2970.43	1.5185	0.102892	8.63295	5.97872e-18	5.37508e-17	KDB18137.1	putative transcription factor (Snd1/p100)
UV8b_986	1082.71	2.6774	0.109002	14.3684	8.16999e-47	2.68456e-45	KDB18138.1	adenylosuccinate lyase
UV8b_987	862.31	2.5475	0.104946	14.1996	9.2098e-46	2.89022e-44	KDB18139.1	adenylosuccinate lyase
UV8b_1000	266.346	2.94741	0.226098	7.62555	2.42989e-14	1.67435e-13	KDB18152.1	hypothetical protein UV8b_1000
UV8b_1005	1173.02	4.67479	0.154885	17.6556	9.22154e-70	6.18138e-68	KDB18157.1	hypothetical protein UV8b_1005
UV8b_1006	47.7232	2.21065	0.295906	4.37014	1.24169e-05	3.60503e-05	KDB18158.1	extracellular elastinolytic metalloproteinase
UV8b_1010	990.393	4.51338	0.113173	23.3285	2.27606e-120	3.97315e-118	KDB18162.1	hypothetical protein UV8b_1010
UV8b_1011	5339.51	3.02138	0.129427	13.6555	1.87104e-42	5.27859e-41	KDB18163.1	hypothetical protein UV8b_1011
UV8b_1012	1963.54	3.7621	0.230983	9.52747	1.6116e-21	1.81989e-20	KDB18164.1	ketosteroid isomerase-like protein
UV8b_1014	119.28	2.20004	0.22177	5.80304	6.51223e-09	2.81413e-08	KDB18166.1	hypothetical protein UV8b_1014
UV8b_1022	908.851	1.00357	0.10511	5.58511	2.33547e-08	9.53326e-08	KDB18174.1	Mitochondrial division protein 1
UV8b_1035	1619.97	2.52713	0.140646	10.5106	7.72175e-26	1.10035e-24	KDB18187.1	l-amino-acid oxidase
UV8b_1060	8616.83	1.47039	0.0808283	10.6414	1.91247e-26	2.82123e-25	KDB18212.1	aspartyl-tRNA synthetase
UV8b_1061	2103.05	5.04749	0.117465	25.136	2.00953e-139	4.55077e-137	KDB18213.1	1,2-a-D-mannosidase
UV8b_1064	4659.64	4.20642	0.1227	20.0537	1.8725e-89	1.91337e-87	KDB18216.1	FAD dependent oxidoreductase
UV8b_1066	4167.57	1.55949	0.147008	6.2054	5.45595e-10	2.6213e-09	KDB18218.1	pyruvate dehydrogenase E1 component beta subunit
UV8b_1070	163.785	1.06628	0.180809	3.44969	0.000561221	0.00126649	KDB18222.1	decarboxylase family protein
UV8b_1076	547.799	1.72644	0.208712	4.83874	1.30663e-06	4.2985e-06	KDB18228.1	Chromosome segregation in meiosis protein 3
UV8b_1077	8776.1	1.58701	0.274106	3.3868	0.000707127	0.00157182	KDB18229.1	NADH-ubiquinone oxidoreductase 21 kDa subunit
UV8b_1078	447.77	3.74266	0.194938	11.2309	2.87674e-29	4.69867e-28	KDB18230.1	NACHT and Ankyrin domain protein
UV8b_1079	315.993	2.6921	0.167853	9.3819	6.47921e-21	7.05973e-20	KDB18231.1	HET-s domain protein
UV8b_1080	10652.8	5.63987	0.151928	21.715	1.48056e-104	2.1389e-102	KDB18232.1	hypothetical protein UV8b_1080
UV8b_1081	2392.33	5.06294	0.224582	13.1873	1.0381e-39	2.69295e-38	KDB18233.1	CRE-TRX-1 protein
UV8b_1086	2616.1	1.89426	0.129322	8.56829	1.05032e-17	9.3227e-17	KDB18238.1	Isopenicillin N synthase and related dioxygenase
UV8b_1107	19219.4	1.51411	0.11525	7.68496	1.53043e-14	1.08215e-13	KDB18259.1	hydrophobic surface binding protein A
UV8b_1110	3382.45	1.32503	0.135472	5.72141	1.05644e-08	4.48425e-08	KDB18262.1	hypothetical protein UV8b_1110
UV8b_1113	236.196	2.49856	0.215559	6.78035	1.19888e-11	6.7737e-11	KDB18265.1	putative O-methyltransferase
UV8b_1115	1741.63	1.91128	0.120431	9.28356	1.63909e-20	1.75386e-19	KDB18267.1	glycosyltransferase family 31 protein
UV8b_1117	1085.82	1.25049	0.165945	4.40804	1.04313e-05	3.06357e-05	KDB18269.1	26S protease regulatory subunit 6B
UV8b_1118	1295.63	1.71253	0.130383	7.68324	1.55119e-14	1.09314e-13	KDB18270.1	hypothetical protein UV8b_1118
UV8b_1119	53.413	3.78313	0.322529	6.86136	6.82093e-12	3.92801e-11	KDB18271.1	hypothetical protein UV8b_1119
UV8b_1124	43.4735	1.82372	0.341769	3.12143	0.00179973	0.00372897	KDB18276.1	hypothetical protein UV8b_1124
UV8b_1138	36.3637	1.45832	0.376155	2.26786	0.023338	0.0387456	KDB18290.1	agglutinin-like protein
UV8b_1139	163.196	1.25737	0.367401	2.00193	0.0452919	0.0705044	KDB18291.1	cell agglutination protein mam3
UV8b_1144	574.814	1.03369	0.148868	4.06179	4.86977e-05	0.00012929	KDB18296.1	putative MFS transporter
UV8b_1145	197.368	4.0569	0.172286	13.7744	3.6363e-43	1.06162e-41	KDB18297.1	glucan endo-1,3-beta-glucosidase
UV8b_1146	1400.81	1.23594	0.111299	6.49584	8.25736e-11	4.26299e-10	KDB18298.1	BAR domain containing protein
UV8b_1147	633.004	1.0294	0.133838	4.49915	6.82254e-06	2.06078e-05	KDB18299.1	cyclin CCL1
UV8b_1148	1264.21	1.12959	0.20744	3.18536	0.00144576	0.00304373	KDB18300.1	hypothetical protein UV8b_1148
UV8b_1150	157.536	2.30644	0.222635	6.06007	1.36064e-09	6.27796e-09	KDB18302.1	hypothetical protein UV8b_1150
UV8b_1152	1330.5	1.24247	0.123149	5.90182	3.59506e-09	1.59212e-08	KDB17785.1	imidazoleglycerol-phosphate dehydratase
UV8b_1158	830.063	1.04356	0.143319	4.25933	2.05039e-05	5.75744e-05	KDB17791.1	putative ceramide glucosyltransferase
UV8b_1161	3549.61	1.50883	0.0938081	9.40867	5.02441e-21	5.53213e-20	KDB17794.1	SGT1 and CS domain containing protein
UV8b_1162	1337.48	2.47622	0.115201	12.5737	2.94667e-36	6.53178e-35	KDB17795.1	oxidosqualene:lanosterol cyclase
UV8b_1165	575.194	4.4648	0.147718	17.6805	5.92377e-70	4.00285e-68	KDB17798.1	phospholipase A2
UV8b_1171	1321.47	1.15835	0.10952	6.18692	6.13492e-10	2.9307e-09	KDB17804.1	putative lipase
UV8b_1173	272.664	3.09499	0.172796	10.4774	1.09706e-25	1.54492e-24	KDB17806.1	hypothetical protein UV8b_1173
UV8b_1174	418.176	1.09384	0.124804	5.12686	2.94619e-07	1.04646e-06	KDB17807.1	WSC domain containing protein
UV8b_1177	3156.44	1.24422	0.0899409	8.09222	5.85885e-16	4.57089e-15	KDB17810.1	DUF1640-domain-containing protein
UV8b_1180	6684.04	1.25368	0.127547	5.74967	8.94194e-09	3.8305e-08	KDB17813.1	adenosylhomocysteinase
UV8b_1185	6350.12	2.09273	0.124835	9.80633	1.05747e-22	1.27124e-21	KDB17818.1	succinate dehydrogenase iron-sulfur protein precursor
UV8b_1189	22691.7	2.32192	0.28868	4.70499	2.53877e-06	8.04249e-06	KDB17822.1	60S acidic ribosomal protein P2
UV8b_1193	911.134	1.40334	0.12319	6.6637	2.67013e-11	1.45658e-10	KDB17826.1	DUF850 domain protein
UV8b_1200	1333.78	1.20063	0.109099	6.43751	1.21446e-10	6.17101e-10	KDB17833.1	hypothetical protein UV8b_1200
UV8b_1206	1678.03	2.03907	0.126815	9.40564	5.17151e-21	5.67917e-20	KDB17839.1	putative 60S ribosome biogenesis protein Mak11
UV8b_1222	986.93	1.06381	0.186873	3.32999	0.000868487	0.00190001	KDB17855.1	mitochondrial import inner membrane translocase subunit tim23
UV8b_1228	391.319	1.87017	0.205748	5.31708	1.05447e-07	3.96384e-07	KDB17861.1	hypothetical protein UV8b_1228
UV8b_1237	2769.74	1.74597	0.218421	4.67596	2.92575e-06	9.20574e-06	KDB17870.1	hypothetical protein UV8b_1237
UV8b_1258	442.831	2.23036	0.167965	7.76754	8.00277e-15	5.81068e-14	KDB17891.1	trifunctional tryptophan biosynthesis enzyme
UV8b_1259	2582.84	2.00683	0.13939	8.42184	3.70624e-17	3.19492e-16	KDB17892.1	trifunctional tryptophan biosynthesis enzyme
UV8b_1269	927.904	2.56294	0.197748	7.58148	3.41623e-14	2.3291e-13	KDB17902.1	smr domain-containing protein
UV8b_1280	899.492	1.11225	0.141076	4.61188	3.99043e-06	1.23699e-05	KDB17913.1	putative mitochondrial DNA helicase (Pif1)
UV8b_1297	1020.9	1.18117	0.221361	3.12133	0.00180034	0.00372931	KDB17930.1	cell division-associated protein bimb
UV8b_1305	1005.75	2.35674	0.100648	13.6974	1.0527e-42	3.02075e-41	KDB17938.1	hypothetical protein UV8b_1305
UV8b_1307	1305.39	1.82417	0.238154	4.48059	7.44371e-06	2.23953e-05	KDB17940.1	DUF788 domain-containing protein
UV8b_1310	1666.15	3.20513	0.124529	15.0558	3.16318e-51	1.32522e-49	KDB17943.1	putative trafficking protein particle complex subunit 2
UV8b_1311	1017.28	1.24878	0.169867	4.30037	1.70512e-05	4.85464e-05	KDB17944.1	nuclear cap binding protein subunit 2
UV8b_1342	619.984	2.32022	0.242021	5.60795	2.04739e-08	8.43414e-08	KDB17975.1	Brix domain containing protein
UV8b_1343	523.665	1.97546	0.202128	5.71703	1.08405e-08	4.59446e-08	KDB17976.1	nuclear export protein Noc3
UV8b_1364	6369.24	1.68576	0.229655	4.29386	1.75595e-05	4.98582e-05	KDB17997.1	hypothetical protein UV8b_1364
UV8b_1367	869.109	1.83891	0.139812	7.69386	1.42756e-14	1.01026e-13	KDB18000.1	putative RNA polymerase III transcription factor TFIIIC subunit (Tfc4)
UV8b_1380	5791.82	3.55965	0.122968	16.9334	2.55291e-64	1.5064e-62	KDB17496.1	suaprga1-like protein
UV8b_1401	792.989	3.01733	0.14186	12.442	1.54511e-35	3.3196e-34	KDB17517.1	2,5-diketo-D-gluconic acid reductase A
UV8b_1410	8068.51	1.44174	0.100956	8.35379	6.61083e-17	5.56705e-16	KDB17526.1	tubulin beta chain
UV8b_1430	1330.88	1.7477	0.113299	9.02337	1.82397e-19	1.79801e-18	KDB17546.1	exo-beta-1,3-glucanase
UV8b_1431	7084.01	2.70155	0.197583	7.9982	1.26248e-15	9.62544e-15	KDB17547.1	2-oxoisovalerate dehydrogenase beta subunit precursor
UV8b_1432	5775.8	2.11937	0.128773	9.62747	6.12211e-22	7.06572e-21	KDB17548.1	putative cytochrome b5
UV8b_1433	280.508	2.35614	0.193877	7.10889	1.1698e-12	7.19123e-12	KDB17549.1	transcription initiation factor IIE subunit beta
UV8b_1434	6980.53	1.99367	0.143102	8.14958	3.65198e-16	2.90047e-15	KDB17550.1	DSBA-like thioredoxin domain protein
UV8b_1438	2814.21	2.30425	0.190652	7.06993	1.55006e-12	9.43209e-12	KDB17554.1	methylene-fatty-acyl-phospholipid synthase
UV8b_1439	1365.95	1.11431	0.0909919	7.16359	7.85895e-13	4.89956e-12	KDB17555.1	hypothetical protein UV8b_1439
UV8b_1448	2337.55	1.04508	0.133134	4.59187	4.39295e-06	1.35624e-05	KDB17564.1	putative ATP-dependent DNA helicase
UV8b_1451	2210.72	2.10217	0.228215	5.38829	7.11311e-08	2.739e-07	KDB17567.1	putative short-chain dehydrogenase
UV8b_1452	2588.68	1.20357	0.190408	3.69757	0.000217677	0.000524416	KDB17568.1	sister chromatid cohesion protein
UV8b_1455	5515.15	1.01062	0.119424	4.95021	7.41333e-07	2.51381e-06	KDB17571.1	Vacuolar ATP synthase subunit B
UV8b_1456	1553.49	2.14333	0.163332	7.67618	1.63905e-14	1.15408e-13	KDB17572.1	hydroxymethylglutaryl-CoA lyase
UV8b_1457	10409.9	2.95999	0.0892645	19.3972	8.14268e-84	7.25825e-82	KDB17573.1	Tubulin alpha chain
UV8b_1459	2014.39	1.58622	0.0994735	9.32791	1.07979e-20	1.16742e-19	KDB17575.1	signaling related protein
UV8b_1466	5308.4	1.9532	0.0970122	11.7774	5.10533e-32	9.48504e-31	KDB17582.1	ubiquinol-cytochrome-c reductase complex core protein 2
UV8b_1468	1528	1.19753	0.186208	3.76196	0.000168584	0.000413635	KDB17584.1	putative mitochondrial carrier protein YHM1/SHM1
UV8b_1469	3116.28	1.64358	0.172063	5.5877	2.30094e-08	9.41844e-08	KDB17585.1	chromosome segregation ATPase
UV8b_1471	3095.8	1.87175	0.12596	8.69246	3.54668e-18	3.22667e-17	KDB17587.1	37S ribosomal protein S5
UV8b_1478	2912.05	2.03273	0.203252	5.85021	4.90938e-09	2.14584e-08	KDB17594.1	NifU-like protein
UV8b_1480	6559.03	1.43696	0.0969812	8.66734	4.42328e-18	4.00677e-17	KDB17596.1	60S ribosomal protein L15
UV8b_1488	5047.07	2.30368	0.0869271	15.5022	3.34969e-54	1.55067e-52	KDB17604.1	betaine aldehyde dehydrogenase
UV8b_1490	456.821	1.74455	0.214452	4.75862	1.9492e-06	6.26241e-06	KDB17606.1	non-ribosomal peptide synthetase
UV8b_1494	142.759	2.07502	0.267027	4.54565	5.47657e-06	1.67414e-05	KDB17610.1	translation initiation factor eif-2b subunit family protein
UV8b_1502	1476.85	1.08936	0.120053	5.30795	1.10867e-07	4.16011e-07	KDB17618.1	hypothetical protein UV8b_1502
UV8b_1508	4887.87	1.1282	0.115179	5.72984	1.00524e-08	4.27559e-08	KDB17624.1	40S ribosomal protein S14 (CRP2)
UV8b_1510	501.12	1.21133	0.207	3.4231	0.000619102	0.00138851	KDB17626.1	iron-sulfur cluster assembly accessory protein
UV8b_1514	1675.73	1.46953	0.12646	6.79752	1.06433e-11	6.04203e-11	KDB17630.1	hypothetical protein UV8b_1514
UV8b_1515	363.816	1.27683	0.156558	4.77074	1.83553e-06	5.92676e-06	KDB17631.1	hypothetical protein UV8b_1515
UV8b_1519	1279.09	2.42943	0.122272	11.6227	3.16085e-31	5.65913e-30	KDB17635.1	leucine rich repeat domain containing protein
UV8b_1522	612.667	1.80329	0.118311	8.91599	4.83493e-19	4.66726e-18	KDB17638.1	hypothetical protein UV8b_1522
UV8b_1527	59.4937	1.98615	0.328735	3.53422	0.000408975	0.000944282	KDB17643.1	hypothetical protein UV8b_1527
UV8b_1528	1457.21	6.07282	0.130651	27.1897	8.60336e-163	3.13424e-160	KDB17644.1	F-box domain containing protein
UV8b_1535	28062	4.70688	0.0859071	32.0503	2.17484e-225	1.8223e-222	KDB17651.1	protein kinase domain-containing protein
UV8b_1536	1882.38	1.63081	0.0867719	10.9939	4.08925e-28	6.35692e-27	KDB17652.1	putative cytochrome P450 oxidoreductase
UV8b_1539	3469.33	1.08883	0.193195	3.29682	0.000977871	0.00211994	KDB17655.1	NADH:ubiquinone oxidoreductase 20.1kD subunit
UV8b_1543	371.246	1.78531	0.164999	6.32938	2.46141e-10	1.21748e-09	KDB17659.1	increased loss of mitochondrial DNA protein 1
UV8b_1544	118.247	2.03152	0.199272	5.96351	2.46874e-09	1.11272e-08	KDB17660.1	hypothetical protein UV8b_1544
UV8b_1545	184.324	1.23633	0.157015	4.60596	4.10569e-06	1.27131e-05	KDB17661.1	hypothetical protein UV8b_1545
UV8b_1546	332.409	2.88068	0.216248	7.7924	6.57502e-15	4.80734e-14	KDB17662.1	hypothetical protein UV8b_1546
UV8b_1547	1205.99	1.49754	0.12705	6.89496	5.38802e-12	3.12647e-11	KDB17663.1	putative cytoskeleton organization protein
UV8b_1556	740.756	1.61999	0.123823	7.65314	1.96123e-14	1.36488e-13	KDB17672.1	SWIB/MDM2 domain protein
UV8b_1560	3102.16	1.61876	0.158374	5.97898	2.24535e-09	1.01422e-08	KDB17676.1	T-complex protein 1, beta subunit
UV8b_1565	4979.7	1.79758	0.143495	7.3279	2.33783e-13	1.51147e-12	KDB17681.1	hypothetical protein UV8b_1565
UV8b_1566	791.968	1.79102	0.179597	5.8335	5.42761e-09	2.36134e-08	KDB17682.1	hypothetical protein UV8b_1566
UV8b_1568	1571.07	1.52259	0.213178	4.178	2.94083e-05	8.06059e-05	KDB17684.1	hypothetical protein UV8b_1568
UV8b_1572	891.8	1.07748	0.228011	2.76426	0.0057052	0.0108031	KDB17688.1	hypothetical protein UV8b_1572
UV8b_1579	1741.38	1.80419	0.110739	9.5304	1.56674e-21	1.77401e-20	KDB17695.1	DNA polymerase zeta catalytic subunit
UV8b_1582	14222.9	1.20487	0.259501	2.71599	0.00660775	0.0123338	KDB17698.1	60S ribosomal protein L21
UV8b_1584	826.859	4.36658	0.266705	9.57718	9.97263e-22	1.13843e-20	KDB17700.1	hypothetical protein UV8b_1584
UV8b_1587	12851.6	2.35694	0.206425	6.67903	2.40525e-11	1.31465e-10	KDB17703.1	putative cytochrome c oxidase subunit VIa
UV8b_1590	1609.48	2.37712	0.19686	7.0635	1.62357e-12	9.87223e-12	KDB17706.1	hypothetical protein UV8b_1590
UV8b_1591	1131.02	1.10284	0.11014	5.85725	4.70584e-09	2.06117e-08	KDB17707.1	urea transporter
UV8b_1594	9042.09	1.19554	0.100623	6.95016	3.6486e-12	2.14537e-11	KDB17710.1	anaphase-promoting complex subunit Apc5
UV8b_1600	24.7667	1.5157	0.420203	2.10999	0.034859	0.055635	KDB17716.1	hypothetical protein UV8b_1600
UV8b_1611	12596.2	1.99411	0.127714	9.1335	6.63212e-20	6.76864e-19	KDB17727.1	CHCH domain protein
UV8b_1616	2069.92	1.48502	0.113538	7.65101	1.99412e-14	1.38662e-13	KDB17732.1	RNA binding protein
UV8b_1619	14415	1.79853	0.139183	7.55892	4.06417e-14	2.74626e-13	KDB17735.1	2-methylcitrate dehydratase
UV8b_1625	61061.8	3.7099	0.241123	9.00019	2.25338e-19	2.20573e-18	KDB17741.1	adhesin protein Mad1
UV8b_1626	575.144	4.61269	0.135395	19.9287	2.29293e-88	2.2872e-86	KDB17742.1	phenylacetyl-CoA ligase
UV8b_1632	2182.84	1.76147	0.103179	9.98645	1.74735e-23	2.19836e-22	KDB17748.1	ATP12 ATPase family protein
UV8b_1633	5866.02	1.24115	0.0856149	8.48016	2.24891e-17	1.95905e-16	KDB17749.1	putative coatomer gamma-2 subunit
UV8b_1644	1063.22	1.18976	0.133434	5.21577	1.83052e-07	6.69485e-07	KDB17760.1	MAGE family protein
UV8b_1674	2383.91	1.06514	0.154888	4.02269	5.75379e-05	0.00015099	KDB17417.1	DUF890 domain-containing protein
UV8b_1677	364.934	1.97831	0.167801	6.89651	5.3296e-12	3.09621e-11	KDB17420.1	putative glutathione-S-transferase theta, GST
UV8b_1678	470.467	2.63589	0.137335	11.2273	2.99658e-29	4.86597e-28	KDB17421.1	hypothetical protein UV8b_1678
UV8b_1681	2615.76	3.00948	0.115031	15.304	7.18516e-53	3.18542e-51	KDB17424.1	hypothetical protein UV8b_1681
UV8b_1684	814.513	1.94804	0.174062	6.54671	5.88182e-11	3.08796e-10	KDB17427.1	secreted in xylem 1 protein
UV8b_1685	1261.69	1.35698	0.14897	5.32848	9.904e-08	3.73656e-07	KDB17428.1	putative eukaryotic translation initiation factor 3 subunit CLU1/TIF31
UV8b_1686	766.587	1.52481	0.141024	6.32484	2.53489e-10	1.25235e-09	KDB17429.1	FKH1-like protein
UV8b_1688	3792.66	1.57159	0.168899	5.44305	5.23751e-08	2.05358e-07	KDB17431.1	Protein transport protein sec-23
UV8b_1689	486.991	1.2067	0.195344	3.6135	0.000302087	0.000709612	KDB17432.1	Protein transport protein sec-23
UV8b_1690	302.381	1.26833	0.169618	4.3741	1.21933e-05	3.54502e-05	KDB17433.1	transport protein sec23
UV8b_1691	1380.94	1.92324	0.2133	5.27437	1.33215e-07	4.95213e-07	KDB17434.1	hypothetical protein UV8b_1691
UV8b_1694	10421.7	1.53104	0.153651	5.82877	5.58361e-09	2.4241e-08	KDB17437.1	60S ribosomal protein L10A
UV8b_1695	989.121	1.24453	0.124539	5.84559	5.04781e-09	2.20404e-08	KDB17438.1	HEAT repeat protein
UV8b_1712	1702.67	1.15507	0.171915	3.93028	8.48477e-05	0.000218079	KDB17455.1	putative TRAPP complex subunit (Bet5)
UV8b_1715	932.981	1.40879	0.116772	7.05725	1.69827e-12	1.02891e-11	KDB17458.1	DUF1649 domain protein
UV8b_1716	1034.4	1.21084	0.252154	2.80898	0.00496993	0.00951624	KDB17459.1	forkhead box protein L2
UV8b_1728	4799.01	2.25533	0.0996859	13.2344	5.55285e-40	1.45854e-38	KDB17471.1	curved DNA-binding protein
UV8b_1731	2853.87	1.76886	0.348423	2.96971	0.00298079	0.00593537	KDB17474.1	putative RNA binding protein Jsn1
UV8b_1734	815.146	1.79004	0.123317	8.49122	2.04482e-17	1.79034e-16	KDB17477.1	glycyl-tRNA synthetase 1
UV8b_1735	1862.14	1.69008	0.117061	8.44544	3.02899e-17	2.62732e-16	KDB17478.1	glycyl-tRNA synthetase 1
UV8b_1736	2336.02	1.59747	0.219151	4.26399	2.00804e-05	5.64989e-05	KDB17479.1	60S ribosome subunit biogenesis protein NIP7
UV8b_1750	2060.82	1.66627	0.0933146	10.4454	1.53838e-25	2.15553e-24	KDB17153.1	inner membrane magnesium transporter MRS2 precursor
UV8b_1751	2101.16	2.42674	0.120936	11.7381	8.13156e-32	1.49417e-30	KDB17154.1	hypothetical protein UV8b_1751
UV8b_1755	1124.87	2.08817	0.176028	6.93924	3.94209e-12	2.30823e-11	KDB17158.1	DUF1721 domain containing protein
UV8b_1776	13289.5	2.12686	0.192092	6.47675	9.37193e-11	4.82651e-10	KDB17179.1	putative peroxisomal membrane protein
UV8b_1777	9687.06	1.32288	0.208977	3.70296	0.0002131	0.00051398	KDB17180.1	60S ribosomal protein L24a
UV8b_1779	7355.34	1.48423	0.241212	3.59941	0.00031894	0.000746063	KDB17182.1	putative transcription factor BTF3a
UV8b_1781	1165.18	1.15057	0.172077	3.91127	9.18105e-05	0.000234465	KDB17184.1	CBP4 domain-containing protein
UV8b_1782	775.768	2.0033	0.131728	8.89605	5.78687e-19	5.54784e-18	KDB17185.1	suppressor of ascus dominance
UV8b_1790	15.7825	2.25985	0.514874	2.56748	0.010244	0.0183918	KDB17193.1	hypothetical protein UV8b_1790
UV8b_1808	2577.14	1.53712	0.222487	4.04139	5.31344e-05	0.000140092	KDB17211.1	hypothetical protein UV8b_1808
UV8b_1826	7612.87	3.90539	0.219664	10.4	2.47972e-25	3.45142e-24	KDB17229.1	methylcrotonoyl-CoA carboxylase beta chain precursor
UV8b_1827	13339.2	3.64714	0.146013	14.6114	2.3774e-48	8.33483e-47	KDB17230.1	isovaleryl-CoA dehydrogenase precursor
UV8b_1840	2724.15	1.63967	0.150457	6.37488	1.83101e-10	9.13762e-10	KDB17243.1	hypothetical protein UV8b_1840
UV8b_1846	4720.11	1.22137	0.233379	3.06137	0.00220327	0.00449835	KDB17249.1	hypothetical protein UV8b_1846
UV8b_1852	1055.51	1.07719	0.205106	3.07214	0.00212531	0.00434872	KDB17255.1	transcription initiation factor TFIID complex 60 kDa subunit
UV8b_1853	12103	1.48984	0.180738	4.8219	1.42197e-06	4.65055e-06	KDB17256.1	succinate dehydrogenase cytochrome b subunit
UV8b_1856	4148.87	1.54487	0.164856	5.48169	4.21288e-08	1.6706e-07	KDB17259.1	protein transport protein SEC61 alpha subunit
UV8b_1857	26585.8	2.51939	0.227836	6.46848	9.89953e-11	5.08884e-10	KDB17260.1	ATP-dependent bile acid permease
UV8b_1872	1752.15	1.03553	0.117825	5.14104	2.73222e-07	9.77767e-07	KDB17275.1	putative mitochondrial fusion protein (Ugo1)
UV8b_1874	1350.88	1.81785	0.171847	6.18792	6.09634e-10	2.91393e-09	KDB17277.1	DUF1665 domain-containing protein
UV8b_1884	1155.04	1.00948	0.245866	2.40174	0.0163173	0.0281323	KDB17287.1	holo-acyl-carrier-protein synthase
UV8b_1898	436.82	1.20246	0.128219	5.48588	4.11416e-08	1.63455e-07	KDB17301.1	putative origin recognition complex subunit Orc4
UV8b_1900	2733.97	1.81501	0.110582	9.60115	7.9055e-22	9.06158e-21	KDB17303.1	MMC protein
UV8b_1908	4675.41	1.97903	0.21584	5.36351	8.16209e-08	3.12141e-07	KDB17311.1	Pyridoxine biosynthesis protein PDX1
UV8b_1914	5042.67	1.79953	0.101569	10.364	3.6163e-25	4.94748e-24	KDB17317.1	Isocitrate dehydrogenase
UV8b_1915	3461.63	4.34554	0.199723	12.7275	4.15956e-37	9.62789e-36	KDB17318.1	DUF636 domain-containing protein
UV8b_1916	3063.21	1.21984	0.116685	6.11529	9.63823e-10	4.51166e-09	KDB17319.1	lysyl-tRNA synthetase
UV8b_1922	2432.51	1.94892	0.108226	10.5339	6.02674e-26	8.66176e-25	KDB17325.1	Tyrosyl-tRNA synthetase
UV8b_1923	1367.07	1.89389	0.113451	9.7651	1.58949e-22	1.8972e-21	KDB17326.1	hypothetical protein UV8b_1923
UV8b_1924	2224.44	1.98094	0.146481	7.91079	2.55762e-15	1.922e-14	KDB17327.1	succinate dehydrogenase cytochrome b small subunit precursor
UV8b_1931	145.496	2.80169	0.229171	7.15136	8.59215e-13	5.34871e-12	KDB17334.1	NIMA-interacting protein TinC
UV8b_1946	169.113	1.22873	0.169493	4.24064	2.22885e-05	6.20655e-05	KDB17349.1	hypothetical protein UV8b_1946
UV8b_1947	4189.86	1.23418	0.184593	3.91102	9.19088e-05	0.000234645	KDB17350.1	mitochondrial import inner membrane translocase subunit TIM10
UV8b_1952	17185.9	1.71536	0.192152	5.22203	1.76974e-07	6.48389e-07	KDB17355.1	Cutinase gene palindrome-binding protein
UV8b_1964	562.986	1.07624	0.210547	2.99013	0.00278857	0.00558448	KDB17367.1	hypothetical protein UV8b_1964
UV8b_1976	207.863	1.42829	0.206239	4.05111	5.0976e-05	0.000134868	KDB17379.1	hypothetical protein UV8b_1976
UV8b_1977	130.237	1.67925	0.20331	4.83151	1.35502e-06	4.44197e-06	KDB17380.1	hypothetical protein UV8b_1977
UV8b_1982	1427.67	1.66905	0.159361	6.12653	8.9816e-10	4.22317e-09	KDB17385.1	uv-damaged DNA-binding protein
UV8b_1987	5068.67	2.41164	0.0884938	15.9415	3.26532e-57	1.65819e-55	KDB17390.1	ubiquinol-cytochrome c reductase iron-sulfur subunit
UV8b_1988	4724.76	1.62357	0.148865	6.37981	1.77306e-10	8.85896e-10	KDB17391.1	T-complex protein 1 subunit alpha
UV8b_1998	210.556	1.45678	0.184846	4.61012	4.02438e-06	1.24705e-05	KDB17401.1	putative nucleoside transporter
UV8b_1999	36.7452	1.64378	0.331266	2.90265	0.00370025	0.00724233	KDB17402.1	hypothetical protein UV8b_1999
UV8b_2000	1763.38	2.61413	0.111796	13.6781	1.37173e-42	3.90942e-41	KDB17403.1	hypothetical protein UV8b_2000
UV8b_2013	1678.13	1.26568	0.118974	6.223	4.87747e-10	2.35688e-09	KDB16921.1	electron transfer flavoprotein alpha-subunit
UV8b_2015	423.973	1.51962	0.26778	3.31961	0.000901443	0.00196954	KDB16923.1	transcription factor tos4
UV8b_2018	71.554	6.80959	0.370053	10.7643	5.07599e-27	7.69109e-26	KDB16926.1	LEA domain-containing protein
UV8b_2022	14.0707	2.28669	0.565806	2.36411	0.0180736	0.0307615	KDB16930.1	hypothetical protein UV8b_2022
UV8b_2025	17.6519	3.92414	0.649024	3.53681	0.000404997	0.000935613	KDB16933.1	hypothetical protein UV8b_2025
UV8b_2042	1797.61	1.47332	0.160854	5.35786	8.42148e-08	3.21767e-07	KDB16950.1	putative sodium/calcium transporter
UV8b_2048	485.46	1.05902	0.15691	3.94804	7.87931e-05	0.000203461	KDB16956.1	hypothetical protein UV8b_2048
UV8b_2049	475.582	1.04839	0.240088	2.55435	0.0106387	0.0190514	KDB16957.1	hypothetical protein UV8b_2049
UV8b_2050	249.795	1.20578	0.165887	4.25192	2.11948e-05	5.9395e-05	KDB16958.1	hypothetical protein UV8b_2050
UV8b_2051	145.948	1.27706	0.192297	3.88477	0.000102426	0.000259282	KDB16959.1	hypothetical protein UV8b_2051
UV8b_2060	3116.83	1.11207	0.103994	6.25536	3.96607e-10	1.93095e-09	KDB16968.1	beta-tubulin cofactor d
UV8b_2062	2598.38	1.00783	0.135091	4.36401	1.277e-05	3.69846e-05	KDB16970.1	DNA-directed RNA polymerases II 24 kDa polypeptide
UV8b_2063	4402.83	1.13105	0.107794	6.13783	8.36547e-10	3.93788e-09	KDB16971.1	putative nuclear segregation protein (Bfr1)
UV8b_2065	1588.28	1.29497	0.153546	4.93342	8.08028e-07	2.73333e-06	KDB16973.1	OBG family small GTPase
UV8b_2103	2213.14	1.17144	0.137911	4.96879	6.73726e-07	2.29851e-06	KDB17011.1	hypothetical protein UV8b_2103
UV8b_2105	1644.85	1.99769	0.0928922	12.5799	2.72392e-36	6.05403e-35	KDB17013.1	putative mitochondrial carrier protein
UV8b_2117	2131.01	1.1277	0.137975	4.78104	1.74391e-06	5.64396e-06	KDB17025.1	26S proteasome regulatory subunit
UV8b_2136	970.558	1.12106	0.145934	4.49364	7.00166e-06	2.1111e-05	KDB17044.1	hypothetical protein UV8b_2136
UV8b_2157	5076.78	2.9258	0.11433	14.9696	1.1597e-50	4.71703e-49	KDB17065.1	ATP-dependent RNA helicase mss116 precursor
UV8b_2168	428.177	1.47581	0.157769	5.47188	4.45277e-08	1.76073e-07	KDB17076.1	Peptidase, family M20/M25/M40 protein
UV8b_2172	17561.6	1.51545	0.171355	5.17337	2.29905e-07	8.29619e-07	KDB17080.1	heat shock 70 kDa protein precursor
UV8b_2176	2958.52	1.38435	0.190922	4.24148	2.22046e-05	6.18731e-05	KDB17084.1	proteasome component PUP2
UV8b_2185	1653.06	1.29266	0.216959	3.48525	0.000491669	0.00111948	KDB17093.1	50S ribosomal protein L4
UV8b_2194	1198.1	1.03229	0.127944	4.71962	2.36282e-06	7.5192e-06	KDB17102.1	cell cycle control protein (Cwf4)
UV8b_2196	4524.01	1.20612	0.130934	5.38846	7.10629e-08	2.73764e-07	KDB17104.1	hypothetical protein UV8b_2196
UV8b_2211	416.321	1.11282	0.218888	2.97393	0.00294015	0.00586281	KDB17119.1	1-acylglycerol-3-phosphate acyltransferase
UV8b_2212	5945.01	1.43244	0.0986663	8.49247	2.02288e-17	1.77298e-16	KDB17120.1	eukaryotic translation initiation factor 3
UV8b_2214	2200.27	2.23332	0.107415	12.1623	4.93318e-34	1.00085e-32	KDB17122.1	hypothetical protein UV8b_2214
UV8b_2215	4454.74	1.30813	0.0907654	8.43062	3.43849e-17	2.97329e-16	KDB17123.1	actin binding protein
UV8b_2217	4510.41	2.41981	0.0861971	16.4217	1.33837e-60	7.37778e-59	KDB17125.1	C6 transcription factor
UV8b_2226	2430.09	1.26332	0.0949886	7.77984	7.26159e-15	5.28626e-14	KDB17134.1	phenylalanyl-tRNA synthetase precursor
UV8b_2227	910.661	1.16071	0.151865	4.47092	7.78824e-06	2.33731e-05	KDB17135.1	putative dicarboxylate carrier protein
UV8b_2234	964.869	1.50081	0.125551	6.99251	2.70011e-12	1.60798e-11	KDB17142.1	putative tRNA-specific adenosine-34 deaminase subunit Tad3
UV8b_2236	1517.03	1.05309	0.140714	4.3778	1.19884e-05	3.49031e-05	KDB17144.1	putative nucleoporin-interacting protein NIC96
UV8b_2240	7306.7	3.72422	0.104315	20.8841	7.46397e-97	9.06386e-95	KDB16649.1	mitochondrial hypoxia responsive domain containing protein
UV8b_2245	894.947	1.35709	0.212657	3.73299	0.000189222	0.000460498	KDB16654.1	C2H2 finger domain-containing protein
UV8b_2247	2833.64	3.62931	0.0975427	21.7649	4.98659e-105	7.46119e-103	KDB16656.1	WD-repeat containing protein slp1
UV8b_2251	6716.53	1.67736	0.195754	5.01239	5.37571e-07	1.85636e-06	KDB16660.1	L-arabinitol 4-dehydrogenase
UV8b_2258	3887.14	1.79812	0.146456	7.18188	6.87597e-13	4.30275e-12	KDB16667.1	hypothetical protein UV8b_2258
UV8b_2259	2138.16	2.03436	0.169643	7.01486	2.30179e-12	1.37861e-11	KDB16668.1	hypothetical protein UV8b_2259
UV8b_2260	8383.28	1.13796	0.128329	5.18719	2.13495e-07	7.73736e-07	KDB16669.1	succinate semialdehyde dehydrogenase
UV8b_2266	1145.89	1.17363	0.170713	4.02156	5.78151e-05	0.000151622	KDB16675.1	50s ribosomal protein l36
UV8b_2278	4984.71	1.59326	0.0986139	9.45098	3.35684e-21	3.72543e-20	KDB16687.1	glucose-6-phosphate 1-dehydrogenase (G6PD)
UV8b_2280	841.321	1.7891	0.141537	7.39421	1.42247e-13	9.30433e-13	KDB16689.1	protoporphyrinogen oxidase
UV8b_2294	20.3778	2.88129	0.519284	3.24572	0.00117154	0.00250097	KDB16703.1	hypothetical protein UV8b_2294
UV8b_2301	1310.17	3.13791	0.107372	17.0954	1.60696e-65	9.97388e-64	KDB16710.1	hypothetical protein UV8b_2301
UV8b_2302	6590.44	1.03447	0.105182	5.75313	8.76056e-09	3.75664e-08	KDB16711.1	ADP-ribosylation factor
UV8b_2308	2604.62	4.84268	0.108278	26.1622	7.15928e-151	2.06854e-148	KDB16717.1	dihydrolipoamide branched chain transacylase
UV8b_2309	1004.88	1.53069	0.117228	7.63809	2.20471e-14	1.52798e-13	KDB16718.1	mitochondrial ATPase complex subunit ATP10
UV8b_2312	1780.5	2.79457	0.112418	14.5414	6.61886e-48	2.27293e-46	KDB16721.1	putative metalloregulatory protein
UV8b_2326	437.585	1.72625	0.148366	6.80609	1.00287e-11	5.70473e-11	KDB16735.1	WSC domain containing protein
UV8b_2352	1992.06	1.0687	0.219291	2.85076	0.00436143	0.00843008	KDB16761.1	dUTP pyrophosphatase
UV8b_2360	5668.71	1.77709	0.12679	8.19885	2.42706e-16	1.96107e-15	KDB16769.1	putative FKBP-type peptidyl-prolyl isomerase
UV8b_2373	160.859	1.13545	0.220608	3.01075	0.00260607	0.00524911	KDB16782.1	hypothetical protein UV8b_2373
UV8b_2374	2239.2	1.40853	0.187212	4.4011	1.07702e-05	3.15646e-05	KDB16783.1	putative thioredoxin
UV8b_2375	760.388	1.07587	0.108395	5.80602	6.39739e-09	2.76879e-08	KDB16784.1	signal sequence receptor alpha chain
UV8b_2377	2773.54	1.25327	0.228121	3.21372	0.00131029	0.00277246	KDB16786.1	IGR protein domain-containing protein
UV8b_2379	961.931	1.73636	0.147855	6.86961	6.4379e-12	3.71509e-11	KDB16788.1	hypothetical protein UV8b_2379
UV8b_2383	1800.67	1.1898	0.16266	4.27881	1.87897e-05	5.32428e-05	KDB16792.1	cell cycle control protein cwf16
UV8b_2387	1933.51	1.11012	0.104592	6.2087	5.34257e-10	2.57125e-09	KDB16796.1	serine/threonine-protein phosphatase 5
UV8b_2389	1561.57	1.13641	0.102896	6.46047	1.04377e-10	5.34907e-10	KDB16798.1	ABC1 protein
UV8b_2391	794.171	1.96895	0.209934	5.48631	4.10406e-08	1.6313e-07	KDB16800.1	phosphoprotein phosphatase
UV8b_2392	13012.7	1.47298	0.0989285	8.7097	3.0469e-18	2.78711e-17	KDB16801.1	elongation factor 1-gamma
UV8b_2420	316.109	1.18823	0.157442	4.4148	1.01106e-05	2.97773e-05	KDB16829.1	mitogen-activated protein kinase organizer 1
UV8b_2431	2177.8	1.37603	0.168163	4.78658	1.69651e-06	5.49904e-06	KDB16840.1	Viral protein TPX
UV8b_2434	589.121	1.60588	0.140408	6.69034	2.22652e-11	1.22174e-10	KDB16843.1	putative G2/mitotic-specific cyclin (Clb3)
UV8b_2439	885.696	1.24332	0.110795	6.56433	5.22669e-11	2.75784e-10	KDB16848.1	RNA polymerase iii rpc4
UV8b_2441	1488.5	1.09786	0.160563	3.99971	6.342e-05	0.000165906	KDB16850.1	putative nuclear protein SA-1
UV8b_2447	892.557	2.0154	0.114058	10.3363	4.8291e-25	6.56867e-24	KDB16856.1	kinesin
UV8b_2450	1006.13	1.08413	0.229164	2.76735	0.00565145	0.0107135	KDB16859.1	calmodulin
UV8b_2453	673.547	1.49206	0.1139	7.66286	1.81839e-14	1.27324e-13	KDB16862.1	hypothetical protein UV8b_2453
UV8b_2457	655.753	1.99065	0.118303	9.84302	7.34732e-23	8.89642e-22	KDB16866.1	emopamil-binding protein
UV8b_2468	12216.5	1.86539	0.149685	7.28988	3.10236e-13	1.99346e-12	KDB16877.1	WSC domain containing protein
UV8b_2469	277.067	1.46632	0.263926	3.24995	0.00115427	0.00246725	KDB16878.1	putative apoptosis-inducing TAF9-like domain 1 family protein
UV8b_2475	809.196	1.27122	0.148905	4.99392	5.91656e-07	2.03342e-06	KDB16884.1	hypothetical protein UV8b_2475
UV8b_2479	2922.21	1.27383	0.158452	4.70264	2.56823e-06	8.119e-06	KDB16888.1	DnaJ and TPR domain protein
UV8b_2480	8233.49	1.78474	0.0904017	11.5485	7.50964e-31	1.31639e-29	KDB16889.1	dihydrolipoyl dehydrogenase precursor
UV8b_2481	3864.59	1.31134	0.135651	5.65484	1.55993e-08	6.4931e-08	KDB16890.1	fatty acid desaturase
UV8b_2484	24.2397	3.00147	0.448846	3.91169	9.1652e-05	0.000234132	KDB16893.1	dihydrolipoyl dehydrogenase precursor
UV8b_2485	1372.55	1.81066	0.138317	7.65757	1.89483e-14	1.31976e-13	KDB16894.1	ubiquinone biosynthesis protein COQ9 precursor
UV8b_2491	734.018	1.42745	0.169991	4.91207	9.01197e-07	3.03258e-06	KDB16900.1	augmenter of liver regeneration
UV8b_2517	1278.01	1.04958	0.191099	3.21282	0.0013144	0.00277975	KDB16482.1	serine palmitoyltransferase 2
UV8b_2519	2896.69	4.05062	0.101258	23.4003	4.24544e-121	7.56863e-119	KDB16484.1	acetoacetyl-CoA synthase
UV8b_2520	1432.15	1.59787	0.144938	6.44893	1.12643e-10	5.74459e-10	KDB16485.1	G protein beta subunit
UV8b_2531	3153.92	1.64191	0.180131	5.33198	9.7146e-08	3.66826e-07	KDB16496.1	mitochondrial import receptor subunit tom-22
UV8b_2536	7608.08	1.45126	0.173954	4.88019	1.05984e-06	3.52677e-06	KDB16501.1	30S ribosomal protein S9
UV8b_2546	266.652	6.10599	0.22938	15.5715	1.13747e-54	5.38466e-53	KDB16511.1	thiamin biosynthesis protein (thi-4)
UV8b_2551	994.175	1.37975	0.118728	6.79793	1.06132e-11	6.02899e-11	KDB16516.1	glutamyl-tRNA synthetase
UV8b_2557	197.673	1.81544	0.166887	6.36339	1.9735e-10	9.83112e-10	KDB16522.1	DNA repair protein RAD9
UV8b_2559	423.557	1.08792	0.258502	2.46186	0.0138219	0.0242288	KDB16524.1	hypothetical protein UV8b_2559
UV8b_2560	17120.4	1.58482	0.28523	3.25022	0.00115316	0.00246552	KDB16525.1	60S ribosomal protein L34
UV8b_2561	381.162	2.03566	0.233471	5.10036	3.39015e-07	1.19605e-06	KDB16526.1	DUF498 domain-containing protein
UV8b_2571	807.585	1.01859	0.182982	3.25628	0.00112883	0.00241669	KDB16536.1	GTP-binding family protein
UV8b_2573	1687.28	2.1229	0.238026	5.21716	1.81686e-07	6.64825e-07	KDB16538.1	hypothetical protein UV8b_2573
UV8b_2578	676.221	2.56442	0.150179	9.9887	1.7081e-23	2.15523e-22	KDB16543.1	glycosyltransferase family 90 protein
UV8b_2579	262.135	1.64905	0.155969	6.18478	6.2191e-10	2.96922e-09	KDB16544.1	palmitoyltransferase pfa4
UV8b_2595	1111.65	1.46931	0.172383	4.98593	6.16636e-07	2.11062e-06	KDB16560.1	COP9 signalosome complex subunit 12
UV8b_2603	238.512	1.64475	0.161572	5.95473	2.60506e-09	1.17331e-08	KDB16568.1	minor allergen Alt a 7
UV8b_2607	9626.07	1.88317	0.206342	5.33864	9.36454e-08	3.5553e-07	KDB16572.1	Peptidyl-prolyl cis-trans isomerase
UV8b_2620	8.49665	2.94797	0.681612	2.52996	0.0114076	0.0203155	KDB16585.1	hypothetical protein UV8b_2620
UV8b_2621	287.379	2.21942	0.191145	6.79213	1.10492e-11	6.26394e-11	KDB16586.1	Bys1 family protein
UV8b_2633	3014.77	1.08783	0.0845514	7.52606	5.22936e-14	3.50254e-13	KDB16598.1	nuclear distribution protein nudE
UV8b_2636	146.103	4.03962	0.232519	10.1627	2.90812e-24	3.8434e-23	KDB16601.1	NAD(P)-binding domain protein
UV8b_2639	110.7	1.96547	0.328787	3.49687	0.00047075	0.00107594	KDB16604.1	putative dityrosine transporter
UV8b_2641	140.681	2.98859	0.207788	8.41346	3.98073e-17	3.41748e-16	KDB16606.1	pyoverdine dityrosine biosynthesis protein
UV8b_2642	305.718	6.24322	0.199681	18.2894	1.00526e-74	7.26127e-73	KDB16607.1	Cytochrome P450 family protein
UV8b_2643	504.386	1.1528	0.215026	3.13611	0.00171204	0.00356048	KDB16608.1	hypothetical protein UV8b_2643
UV8b_2651	3478.74	1.27098	0.163008	4.56097	5.09172e-06	1.56105e-05	KDB16616.1	alpha-methylacyl-CoA racemase
UV8b_2657	2180.24	1.37282	0.222527	3.60876	0.000307665	0.000722109	KDB16622.1	rhomboid family membrane protein
UV8b_2660	3784.53	1.88014	0.194823	5.6452	1.64994e-08	6.85756e-08	KDB16625.1	protein disulfide-isomerase tigA precursor
UV8b_2661	9110.54	1.43513	0.28895	2.90534	0.0036686	0.00719046	KDB16626.1	40S ribosomal protein S29
UV8b_2662	2289.82	2.32423	0.121456	11.194	4.36219e-29	7.04254e-28	KDB16627.1	elongation factor Tu precursor
UV8b_2665	7977.8	1.1769	0.100933	6.82074	9.05726e-12	5.15913e-11	KDB16630.1	putative 60S ribosomal protein L4
UV8b_2668	8352.53	1.28435	0.0844738	8.89383	5.90382e-19	5.65349e-18	KDB16633.1	putative malate dehydrogenase (NADP+)
UV8b_2670	1903.76	3.45997	0.144465	14.01	1.35393e-44	4.14036e-43	KDB16635.1	cutinase transcription factor 1 beta
UV8b_2671	4808.5	1.5533	0.113434	8.01011	1.1461e-15	8.75401e-15	KDB16636.1	Cutinase transcription factor 1 beta
UV8b_2679	3789.47	1.49007	0.127175	6.85383	7.19007e-12	4.1349e-11	KDB16644.1	centromere microtubule-binding protein cbf5
UV8b_2682	390.289	3.39649	0.162464	12.2293	2.16834e-34	4.45308e-33	KDB16647.1	hypothetical protein UV8b_2682
UV8b_2687	868.052	1.4551	0.121064	7.03079	2.05372e-12	1.23533e-11	KDB16231.1	UDP-Glc/Gal endoplasmic reticulum nucleotide sugar transporter
UV8b_2692	413.726	1.20594	0.18044	3.90949	9.24906e-05	0.000236058	KDB16236.1	nuclear protein involved in pre-rRNA
UV8b_2700	1152.76	1.43349	0.135807	6.1745	6.6373e-10	3.15451e-09	KDB16244.1	hypothetical protein UV8b_2700
UV8b_2703	726.028	1.19448	0.125242	5.579	2.41904e-08	9.85852e-08	KDB16247.1	ATP-dependent RNA helicase mrh-4
UV8b_2707	1283.14	3.07777	0.140791	12.7876	1.92391e-37	4.51553e-36	KDB16251.1	putative serine/threonine protein kinase (Ark1)
UV8b_2711	35095.2	1.77922	0.239094	4.35299	1.34291e-05	3.87608e-05	KDB16255.1	putative GTP cyclohydrolase II
UV8b_2715	799.583	1.24329	0.285593	2.54657	0.0108789	0.0194524	KDB16259.1	hypothetical protein UV8b_2715
UV8b_2725	1256.32	1.98338	0.193663	5.99083	2.08777e-09	9.47128e-09	KDB16269.1	C6 zinc finger domain protein
UV8b_2736	5204.32	2.44197	0.118304	12.0745	1.4398e-33	2.84531e-32	KDB16280.1	metallopeptidase MepB
UV8b_2739	267.091	3.06677	0.191102	9.3874	6.14982e-21	6.70955e-20	KDB16283.1	putative chromosome segregation protein BIR1
UV8b_2740	1129.89	2.60307	0.121438	12.5389	4.5737e-36	1.00585e-34	KDB16284.1	chromosome segregation protein
UV8b_2752	2030.03	2.25128	0.116108	11.3422	8.10717e-30	1.3586e-28	KDB16296.1	Presequence translocated-associated motor subunit pam17
UV8b_2771	80.3091	2.47116	0.31379	4.6067	4.09104e-06	1.26724e-05	KDB16315.1	hypothetical protein UV8b_2771
UV8b_2784	8907.51	1.72151	0.136049	7.40189	1.34263e-13	8.80272e-13	KDB16328.1	ATP synthase delta chain precursor
UV8b_2791	2417.9	1.00196	0.141441	4.14386	3.41509e-05	9.27855e-05	KDB16335.1	guanine nucleotide exchange factor-like protein
UV8b_2793	146.509	3.72101	0.235788	9.23139	2.67145e-20	2.81207e-19	KDB16337.1	hypothetical protein UV8b_2793
UV8b_2797	1665.42	1.84565	0.116351	9.27914	1.70856e-20	1.82369e-19	KDB16341.1	aspartyl aminopeptidase
UV8b_2799	129209	2.2519	0.246846	5.33644	9.47917e-08	3.59231e-07	KDB16343.1	cell wall surface anchor signal protein
UV8b_2803	560.681	1.41571	0.154614	5.35616	8.50104e-08	3.24659e-07	KDB16347.1	armadillo-type fold domain containing protein
UV8b_2807	1177.09	2.08289	0.170497	7.14623	8.91959e-13	5.54431e-12	KDB16351.1	putative erythromycin esterase
UV8b_2808	5575.19	1.72752	0.0904915	11.1672	5.90438e-29	9.45942e-28	KDB16352.1	elicitor protein
UV8b_2812	19.5895	1.48544	0.437699	1.98521	0.0471211	0.0730756	KDB16356.1	hypothetical protein UV8b_2812
UV8b_2813	934.872	1.16918	0.162026	4.22108	2.43139e-05	6.73697e-05	KDB16357.1	PHD finger domain-containing protein
UV8b_2814	2146.4	1.4446	0.174392	4.84562	1.26215e-06	4.1636e-06	KDB16358.1	50S ribosomal subunit L30
UV8b_2820	4134.1	1.41596	0.15724	5.26764	1.38187e-07	5.12786e-07	KDB16364.1	DUF1682 domain protein
UV8b_2821	1115.99	1.29812	0.108792	6.97985	2.95504e-12	1.7548e-11	KDB16365.1	haspin protein kinase
UV8b_2825	805.776	1.29941	0.130568	5.82152	5.83159e-09	2.52914e-08	KDB16369.1	Pinin/SDK/MemA domain protein
UV8b_2830	5962.38	1.26148	0.179487	4.11127	3.93494e-05	0.000105948	KDB16374.1	3-isopropylmalate dehydrogenase Leu2A
UV8b_2840	221.249	1.50937	0.195187	4.52349	6.08283e-06	1.85204e-05	KDB16384.1	hypothetical protein UV8b_2840
UV8b_2841	3812.88	1.25988	0.191407	3.85035	0.000117949	0.000295985	KDB16385.1	hypothetical protein UV8b_2841
UV8b_2849	1677.46	3.57428	0.211188	9.9003	4.15046e-23	5.09922e-22	KDB16393.1	hypothetical protein UV8b_2849
UV8b_2857	2114.5	1.25982	0.251281	2.93277	0.00335955	0.00663438	KDB16401.1	integral membrane protein
UV8b_2858	29279.4	1.13897	0.195863	3.40165	0.000669814	0.00149384	KDB16402.1	hypothetical protein UV8b_2858
UV8b_2859	837.954	1.44198	0.147224	5.72937	1.00805e-08	4.28536e-08	KDB16403.1	phosphatidyl inositol-specific phospholipase C
UV8b_2863	3214.59	1.90084	0.264696	4.20075	2.66036e-05	7.33985e-05	KDB16407.1	DUF543 domain protein
UV8b_2867	838.192	1.15092	0.123102	5.46901	4.52556e-08	1.78866e-07	KDB16411.1	hypothetical protein UV8b_2867
UV8b_2868	5.68019	2.95733	0.794595	2.17712	0.0294718	0.0478019	KDB16412.1	hypothetical protein UV8b_2868
UV8b_2871	1854.47	1.39747	0.120991	6.75646	1.41399e-11	7.93029e-11	KDB16415.1	putative tRNA processing endoribonuclease Trz1
UV8b_2872	3242.6	2.24755	0.104772	12.5485	4.05272e-36	8.95982e-35	KDB16416.1	sideroflexin-1
UV8b_2874	1642.53	2.89665	0.136829	12.3836	3.20731e-35	6.75228e-34	KDB16418.1	zinc transporter protein
UV8b_2882	7156.66	1.73167	0.082773	12.2378	1.95153e-34	4.02755e-33	KDB16426.1	peptidyl-prolyl cis/trans isomerase
UV8b_2883	2602.87	1.05073	0.110133	5.58086	2.39332e-08	9.75847e-08	KDB16427.1	putative DNA directed RNA polymerase II 15 kDa subunit
UV8b_2884	1475.84	1.64216	0.118023	8.13908	3.98308e-16	3.15446e-15	KDB16428.1	50S ribosomal protein L14
UV8b_2890	3258.59	2.68259	0.0944929	16.6067	6.23212e-62	3.50463e-60	KDB16434.1	BTB/POZ domain protein
UV8b_2900	2464.44	3.37047	0.115028	17.1402	7.44197e-66	4.65346e-64	KDB16444.1	FAD binding domain protein
UV8b_2905	133.562	1.7462	0.222739	4.58592	4.51996e-06	1.39187e-05	KDB16449.1	hypothetical protein UV8b_2905
UV8b_2906	6806.87	1.70296	0.09044	11.0147	3.24732e-28	5.07635e-27	KDB16450.1	40S ribosomal protein S7
UV8b_2918	1896.41	1.15532	0.110375	6.12292	9.18741e-10	4.31268e-09	KDB16462.1	exopolygalacturonase
UV8b_2919	7994.28	1.45532	0.131034	6.49682	8.20379e-11	4.23795e-10	KDB16463.1	adenylosuccinate synthetase
UV8b_2926	6092.34	2.17704	0.108895	11.6946	1.35818e-31	2.46859e-30	KDB16470.1	C-14 sterol reductase
UV8b_2928	2030.98	4.18682	0.158097	15.4914	3.9677e-54	1.82667e-52	KDB15998.1	phosphotransferase family protein
UV8b_2929	3015.86	1.51568	0.223751	3.96252	7.41618e-05	0.000192265	KDB15999.1	protein kinase domain-containing protein
UV8b_2930	2914.73	1.04043	0.206805	2.94294	0.00325108	0.0064323	KDB16000.1	serine threonine-protein kinase sgk2
UV8b_2934	1374.2	1.06052	0.207754	2.98605	0.00282609	0.00565151	KDB16004.1	hypothetical protein UV8b_2934
UV8b_2938	5862.54	1.21193	0.0991407	7.15078	8.62857e-13	5.36739e-12	KDB16008.1	neutral trehalase
UV8b_2940	13927.7	2.07835	0.19472	6.24365	4.27487e-10	2.07768e-09	KDB16010.1	glutamate carboxypeptidase
UV8b_2946	4422.56	1.62122	0.111871	8.47716	2.30756e-17	2.00363e-16	KDB16016.1	FACT complex subunit spt-16
UV8b_2947	634.13	1.75556	0.224991	4.56433	5.01103e-06	1.53856e-05	KDB16017.1	putative 4-carboxymuconolactone decarboxylase
UV8b_2963	19.3577	1.71104	0.465412	2.15056	0.0315112	0.0507852	KDB16033.1	hypothetical protein UV8b_2963
UV8b_2968	2666.29	1.61657	0.160063	5.90787	3.46565e-09	1.53888e-08	KDB16038.1	putative ATP-dependent RNA helicase (Hrh1)
UV8b_2974	18239.7	2.60605	0.119266	12.7818	2.07113e-37	4.84749e-36	KDB16044.1	SUN domain protein (Uth1)
UV8b_2979	2149.25	2.73198	0.0985085	16.223	3.46692e-59	1.81558e-57	KDB16049.1	kinase domain containing protein
UV8b_2980	17615.8	1.9908	0.15179	7.67209	1.69216e-14	1.18849e-13	KDB16050.1	putative enolase
UV8b_2981	18223	2.13073	0.0877609	14.2022	8.87749e-46	2.79941e-44	KDB16051.1	argininosuccinate synthase
UV8b_2985	8531.38	2.71974	0.0810916	19.6191	1.0619e-85	9.88629e-84	KDB16055.1	arginyl-tRNA synthetase
UV8b_2986	21811	4.77848	0.158345	17.6528	9.67596e-70	6.43451e-68	KDB16056.1	Alternative oxidase
UV8b_2987	1789.31	2.36469	0.181816	7.608	2.78369e-14	1.91185e-13	KDB16057.1	C2H2 type zinc finger domain-containing protein
UV8b_2988	3236.13	2.60701	0.213405	7.14606	8.93041e-13	5.54692e-12	KDB16058.1	hypothetical protein UV8b_2988
UV8b_3000	1253.37	1.26141	0.135651	5.43954	5.34182e-08	2.08959e-07	KDB16070.1	prolyl-tRNA synthetase
UV8b_3003	873.07	1.78011	0.272952	3.81495	0.000136212	0.000338671	KDB16073.1	thioesterase family protein
UV8b_3012	1117.66	1.4708	0.105105	8.18575	2.70617e-16	2.17819e-15	KDB16082.1	LIM domain protein
UV8b_3013	1187.88	2.02931	0.282967	4.19509	2.72764e-05	7.51313e-05	KDB16083.1	cytochrome c oxidase assembly protein COX19
UV8b_3015	2836.95	2.15533	0.114663	10.9956	4.01213e-28	6.24863e-27	KDB16085.1	mitochondrial outer membrane 72Kda protein
UV8b_3020	11815.7	2.98827	0.129384	13.5104	1.35768e-41	3.72985e-40	KDB16090.1	outer mitochondrial membrane protein porin
UV8b_3028	3453.85	2.55217	0.117708	12.6832	7.32627e-37	1.68183e-35	KDB16098.1	Phage SPO1 DNA polymerase-related protein
UV8b_3030	1366.51	1.09707	0.15538	4.13015	3.62531e-05	9.82105e-05	KDB16100.1	E3 ubiquitin-protein ligase
UV8b_3036	2373.82	1.13093	0.144091	4.5912	4.40703e-06	1.36009e-05	KDB16106.1	30S ribosomal protein S7
UV8b_3039	8969.81	1.56874	0.0779338	11.7748	5.26231e-32	9.75506e-31	KDB16109.1	asparagine synthetase
UV8b_3047	575	1.41889	0.165472	5.01592	5.27809e-07	1.82598e-06	KDB16117.1	putative methyltransferase
UV8b_3048	1474.24	1.03674	0.142807	4.24668	2.16957e-05	6.05972e-05	KDB16118.1	putative methyltransferase
UV8b_3052	4365.43	1.83859	0.244224	4.40376	1.06389e-05	3.11909e-05	KDB16122.1	hypothetical protein UV8b_3052
UV8b_3053	2929.22	1.5667	0.238919	3.83586	0.000125123	0.000312865	KDB16123.1	vacuolar ATP synthase 16 kda proteolipid subunit
UV8b_3072	4167.6	1.66265	0.116063	8.37983	5.3003e-17	4.48146e-16	KDB16142.1	spermidine synthase
UV8b_3073	1820.3	2.70534	0.203172	7.78909	6.74961e-15	4.92639e-14	KDB16143.1	putative nitrilase family protein (Nit3)
UV8b_3078	3187.34	1.04198	0.186358	3.27069	0.00107287	0.00231095	KDB16148.1	proteasome subunit alpha type 6
UV8b_3088	267.574	1.69976	0.157805	6.30078	2.9615e-10	1.45539e-09	KDB16158.1	hypothetical protein UV8b_3088
UV8b_3095	2668.42	1.46882	0.127112	6.75944	1.38531e-11	7.78503e-11	KDB16165.1	hypothetical protein UV8b_3095
UV8b_3100	4843.77	1.1736	0.192512	3.56609	0.000362349	0.00084243	KDB16170.1	NADP-dependent leukotriene B4 12-hydroxydehydrogenase
UV8b_3101	7263.31	2.00505	0.102676	11.4231	3.20678e-30	5.43919e-29	KDB16171.1	ABC transporter
UV8b_3116	2068.02	1.83989	0.12829	8.38934	4.88895e-17	4.15041e-16	KDB16186.1	oligosaccharyl transferase subunit
UV8b_3117	7422.2	1.09416	0.089608	7.14269	9.1521e-13	5.66781e-12	KDB16187.1	G-protein beta subunit
UV8b_3125	10030.5	2.91559	0.179453	9.50393	2.02117e-21	2.27016e-20	KDB16195.1	ankyrin repeat domain containing protein
UV8b_3127	2209.98	1.47113	0.0966466	8.90415	5.37953e-19	5.1751e-18	KDB16197.1	hypothetical protein UV8b_3127
UV8b_3128	3989.33	1.97044	0.235118	4.90237	9.46879e-07	3.17483e-06	KDB16198.1	cytochrome c oxidase family protein
UV8b_3147	32207.9	1.50191	0.206992	4.24444	2.19141e-05	6.11043e-05	KDB16217.1	sucrose-6-phosphate hydrolase
UV8b_3148	5644.17	1.28826	0.229572	3.28254	0.00102875	0.00222276	KDB16218.1	non-ribosomal peptide synthetase
UV8b_3152	381.17	3.11636	0.182914	9.96617	2.14342e-23	2.68056e-22	KDB16222.1	nucleoside-diphosphate-sugar epimerase
UV8b_3165	2119.78	1.32787	0.152248	5.1019	3.36264e-07	1.18684e-06	KDB15853.1	dihydroorotate reductase PyrE
UV8b_3174	3973.39	1.86576	0.255512	4.27143	1.94222e-05	5.48429e-05	KDB15862.1	fatty acid desaturase
UV8b_3177	7449.01	1.20235	0.213049	3.30127	0.000962482	0.00208928	KDB15865.1	ATP synthase D chain
UV8b_3178	8792.48	1.13777	0.220463	3.01887	0.00253719	0.00512877	KDB15866.1	ATP synthase D chain
UV8b_3180	46.2317	1.31325	0.380085	2.02114	0.0432651	0.0676972	KDB15868.1	hypothetical protein UV8b_3180
UV8b_3182	91.4804	2.21882	0.32057	4.04881	5.14789e-05	0.000135984	KDB15870.1	hypothetical protein UV8b_3182
UV8b_3186	32940.6	3.02622	0.125259	14.1326	2.39292e-45	7.48144e-44	KDB15874.1	cell wall protein
UV8b_3187	1492.37	1.41852	0.189966	4.36805	1.25358e-05	3.63704e-05	KDB15875.1	Mediator of RNA polymerase II transcription subunit 31
UV8b_3188	1436.32	1.08249	0.205738	3.07779	0.00208543	0.00427338	KDB15876.1	DNA-directed RNA polymerase iii subunit RPC10
UV8b_3190	580.176	1.26534	0.153432	4.82414	1.40609e-06	4.604e-06	KDB15878.1	thaumatin family protein
UV8b_3191	689.248	1.12659	0.178354	3.69496	0.000219925	0.000529375	KDB15879.1	phosphopantetheinyl transferase
UV8b_3192	5273.2	1.47545	0.134019	6.44003	1.19446e-10	6.08044e-10	KDB15880.1	hsp70-like protein
UV8b_3193	17790	1.99637	0.169655	6.88337	5.84525e-12	3.37775e-11	KDB15881.1	extracellular matrix protein precursor
UV8b_3194	355.44	2.68981	0.225325	6.98298	2.88977e-12	1.71848e-11	KDB15882.1	hypothetical protein UV8b_3194
UV8b_3202	3773.48	1.00203	0.156444	3.74669	0.000179183	0.000437847	KDB15890.1	NADH-ubiquinone oxidoreductase 29.9 kDa subunit
UV8b_3216	13383.6	2.00821	0.190524	6.16576	7.01474e-10	3.32634e-09	KDB15904.1	Eukaryotic translation initiation factor eIF-5A
UV8b_3217	14093.3	1.04373	0.197088	3.09782	0.00194951	0.00402139	KDB15905.1	polyubiquitin
UV8b_3219	2670.4	1.61077	0.178267	5.28557	1.25316e-07	4.66678e-07	KDB15907.1	rhodanese domain-containing protein
UV8b_3226	5044.03	1.13386	0.116061	5.71482	1.09818e-08	4.65202e-08	KDB15914.1	phytase
UV8b_3229	2826.52	1.97127	0.08764	13.1574	1.54223e-39	3.95179e-38	KDB15917.1	RNA-binding La domain protein
UV8b_3231	835.146	1.30767	0.123418	6.19797	5.71964e-10	2.74484e-09	KDB15919.1	hypothetical protein UV8b_3231
UV8b_3232	2379.33	1.73857	0.225974	4.50052	6.77887e-06	2.05055e-05	KDB15920.1	hypothetical protein UV8b_3232
UV8b_3242	2989.21	1.77837	0.167257	6.21965	4.98275e-10	2.40498e-09	KDB15930.1	putative 30S ribosomal subunit S4
UV8b_3248	1643.33	2.261	0.122927	10.7592	5.36261e-27	8.1107e-26	KDB15936.1	guanine deaminase
UV8b_3255	2175.6	1.36451	0.19812	4.02883	5.60559e-05	0.00014747	KDB15943.1	ferrochelatase precursor
UV8b_3257	2479.7	1.87082	0.103941	10.5287	6.37328e-26	9.14413e-25	KDB15945.1	putative mitochondrial membrane fission protein (Fis1)
UV8b_3264	3683.06	1.3311	0.185327	4.20145	2.65209e-05	7.31946e-05	KDB15952.1	U2 small nuclear ribonucleoprotein A\\'
UV8b_3265	885.167	1.16261	0.108286	6.28042	3.37654e-10	1.65257e-09	KDB15953.1	Histone-like transcription factor and archaeal histone family protein
UV8b_3267	580.89	1.38827	0.153468	5.29155	1.21283e-07	4.52463e-07	KDB15955.1	transcription initiation factor iia small subunit
UV8b_3268	449.604	1.76718	0.154449	6.69307	2.18538e-11	1.19995e-10	KDB15956.1	hypothetical protein UV8b_3268
UV8b_3269	2446.49	1.67602	0.145719	6.72809	1.71903e-11	9.56424e-11	KDB15957.1	transcription initiation factor IIA small subunit
UV8b_3274	12398.2	2.49567	0.0881657	16.5583	1.39428e-61	7.73689e-60	KDB15962.1	hypothetical protein UV8b_3274
UV8b_3275	22196.3	2.46086	0.179271	8.02979	9.76379e-16	7.49183e-15	KDB15963.1	nmt1 protein
UV8b_3283	2192.61	1.76636	0.172082	6.00443	1.92007e-09	8.73665e-09	KDB15971.1	hypothetical protein UV8b_3283
UV8b_3284	3313.77	1.30563	0.0936149	8.15838	3.39547e-16	2.70958e-15	KDB15972.1	glucosidase 2 subunit beta precursor
UV8b_3303	83.1607	1.61787	0.25567	3.70161	0.000214235	0.000516569	KDB15991.1	hypothetical protein UV8b_3303
UV8b_3307	3268.85	1.57158	0.266429	3.45051	0.000559537	0.00126303	KDB15995.1	protein kinase domain-containing protein
UV8b_3317	1386.66	1.47516	0.211949	4.07132	4.6747e-05	0.000124387	KDB15677.1	putative RNA-binding protein (Nab3)
UV8b_3331	930.936	3.66501	0.132088	16.2309	3.05137e-59	1.60801e-57	KDB15691.1	membrane fusion mating protein fig1
UV8b_3337	1434.45	2.16889	0.265634	4.77619	1.78646e-06	5.77275e-06	KDB15697.1	putative nucleoporin SONB
UV8b_3341	10808.4	1.46625	0.166881	5.13959	2.7534e-07	9.83407e-07	KDB15701.1	60S ribosomal protein L8
UV8b_3348	8529.98	1.38203	0.258773	3.12411	0.00178347	0.00369801	KDB15708.1	hypothetical protein UV8b_3348
UV8b_3349	2198.24	1.35659	0.183372	4.32755	1.50776e-05	4.32654e-05	KDB15709.1	ras GTPase activating protein
UV8b_3351	2259.41	1.04672	0.119264	5.13394	2.83744e-07	1.01213e-06	KDB15711.1	triose-phosphate transporter
UV8b_3354	1375.8	1.4959	0.141011	6.20553	5.45122e-10	2.62053e-09	KDB15714.1	COP9 signalosome subunit 7 (CsnG)
UV8b_3359	1322.29	1.67276	0.116516	8.39802	4.54082e-17	3.87055e-16	KDB15719.1	thiosulfate sulfurtransferase
UV8b_3376	2745.92	4.68614	0.264167	10.3768	3.16146e-25	4.35689e-24	KDB15736.1	Ser/Thr protein phosphatase
UV8b_3384	4091.46	3.79818	0.128616	17.2746	7.30323e-67	4.63589e-65	KDB15744.1	serine threonine protein kinase
UV8b_3387	2231.74	10.0764	0.171413	34.3865	4.00999e-259	4.79996e-256	KDB15747.1	FAD binding domain protein
UV8b_3388	2722.91	1.32834	0.102143	7.60727	2.79946e-14	1.92111e-13	KDB15748.1	WD domain containing protein
UV8b_3394	52.2058	4.45273	0.321993	8.08926	6.00301e-16	4.679e-15	KDB15754.1	DEAD box helicase
UV8b_3407	3923.64	1.17654	0.0921574	7.46801	8.14193e-14	5.41009e-13	KDB15767.1	hypothetical protein UV8b_3407
UV8b_3410	16904.5	6.07654	0.245499	14.4789	1.64793e-47	5.50119e-46	KDB15770.1	hypothetical protein UV8b_3410
UV8b_3411	3340.84	2.06149	0.146575	8.22715	1.91723e-16	1.57187e-15	KDB15771.1	SWIRM domain-containing protein
UV8b_3420	19619.5	3.07331	0.271262	6.62744	3.41566e-11	1.83123e-10	KDB15780.1	cyanovirin-N family protein
UV8b_3423	442.518	2.65127	0.298271	5.19961	1.99703e-07	7.25949e-07	KDB15783.1	hypothetical protein UV8b_3423
UV8b_3433	117.124	2.74736	0.231236	6.95004	3.65172e-12	2.14571e-11	KDB15793.1	pantothenate transporter liz1
UV8b_3440	3464.74	2.46112	0.135958	10.589	3.35012e-26	4.91605e-25	KDB15800.1	hypothetical protein UV8b_3440
UV8b_3441	2374.54	2.2616	0.151591	8.72713	2.61219e-18	2.39995e-17	KDB15801.1	hypothetical protein UV8b_3441
UV8b_3443	322.981	1.55799	0.224055	4.06759	4.75022e-05	0.000126316	KDB15803.1	hypothetical protein UV8b_3443
UV8b_3444	7008.75	3.61195	0.138987	15.2018	3.43827e-52	1.48501e-50	KDB15804.1	hypothetical protein UV8b_3444
UV8b_3445	3618.05	1.82734	0.105268	10.1543	3.16989e-24	4.16962e-23	KDB15805.1	hypothetical protein UV8b_3445
UV8b_3446	78852.6	3.6709	0.157144	13.6648	1.64734e-42	4.679e-41	KDB15806.1	wall-associated proteinase precursor
UV8b_3447	3950.27	3.94622	0.153313	15.0567	3.1187e-51	1.31314e-49	KDB15807.1	transcriptional activator srcap-like protein
UV8b_3451	6922.36	2.61732	0.104335	14.6743	9.42335e-49	3.44796e-47	KDB15811.1	mitochondrial phosphate carrier protein
UV8b_3452	4830.37	2.55234	0.101358	14.7302	4.12213e-49	1.53508e-47	KDB15812.1	mitochondrial phosphate carrier protein
UV8b_3453	3109.94	2.68914	0.11514	13.662	1.71234e-42	4.84719e-41	KDB15813.1	mitochondrial phosphate carrier protein
UV8b_3460	172.488	2.24822	0.198534	6.62419	3.49168e-11	1.86825e-10	KDB15820.1	hypothetical protein UV8b_3460
UV8b_3474	382.391	4.07145	0.193059	12.3364	5.76823e-35	1.20229e-33	KDB15834.1	conserved leucine-rich repeat protein
UV8b_3475	404.84	2.3334	0.17159	7.95471	1.79545e-15	1.36022e-14	KDB15835.1	protamine P1
UV8b_3478	115.795	1.07751	0.233548	2.6988	0.00695898	0.0129576	KDB15838.1	rho type ras-like GTPase
UV8b_3480	1487.32	1.7035	0.118509	8.40847	4.15387e-17	3.55882e-16	KDB15840.1	37S ribosomal protein S25
UV8b_3482	2851.87	1.07786	0.154197	4.08897	4.33289e-05	0.000115732	KDB15842.1	putative cytochrome c subunit
UV8b_3503	15565.7	1.54684	0.122784	7.36944	1.71348e-13	1.11556e-12	KDB15472.1	Bax Inhibitor family protein
UV8b_3513	1218.58	1.77994	0.174074	5.98134	2.21308e-09	1.00018e-08	KDB15482.1	rhoptry protein
UV8b_3520	430.181	2.2933	0.20687	6.4847	8.89092e-11	4.58725e-10	KDB15489.1	BolA-like family protein
UV8b_3543	4026.31	1.41573	0.0961303	8.61484	7.00409e-18	6.27672e-17	KDB15512.1	DNAJ domain containing protein
UV8b_3555	929.796	1.86252	0.187896	5.79844	6.69333e-09	2.88941e-08	KDB15524.1	putative arsenate reductase (Arc2)
UV8b_3563	1698.97	1.04673	0.180884	3.38504	0.000711682	0.00158049	KDB15532.1	putative acetylserotonin methytransferase-like protein (ASMTL)
UV8b_3565	2011.39	1.21352	0.103868	6.83434	8.2385e-12	4.71197e-11	KDB15534.1	hypothetical protein UV8b_3565
UV8b_3568	2134.37	2.22456	0.0867515	15.0002	7.32517e-51	3.00871e-49	KDB15537.1	mitochondrial carrier protein LEU5
UV8b_3570	2679.38	2.12036	0.247393	5.01361	5.34183e-07	1.8465e-06	KDB15539.1	putative ribosomal protein L23
UV8b_3575	3537.53	1.12192	0.148782	4.41104	1.02877e-05	3.02459e-05	KDB15544.1	eukaryotic translation initiation factor 2 alpha subunit
UV8b_3592	45140.7	3.36516	0.257781	7.6363	2.23554e-14	1.54807e-13	KDB15561.1	chaperonin
UV8b_3601	2189.44	3.1372	0.153845	11.9285	8.40431e-33	1.61143e-31	KDB15570.1	phosphatidylinositol 4-kinase
UV8b_3602	5761.19	4.65122	0.172914	15.7349	8.72008e-56	4.34914e-54	KDB15571.1	putative GNAT family acetyltransferase
UV8b_3609	3054.22	2.5121	0.176502	8.32561	8.38971e-17	7.03678e-16	KDB15578.1	HEAT repeat containing protein
UV8b_3612	524.916	5.23385	0.154454	19.8221	1.92067e-87	1.87131e-85	KDB15581.1	hypothetical protein UV8b_3612
UV8b_3616	4066.9	1.07497	0.131686	4.77513	1.79594e-06	5.80114e-06	KDB15585.1	ATP-dependent protease La
UV8b_3617	2418.59	1.14625	0.192883	3.47626	0.000508456	0.00115425	KDB15586.1	ubiquitin-like protein smt3
UV8b_3619	1898.91	2.18116	0.107913	11.8234	2.95529e-32	5.56458e-31	KDB15588.1	mitosis protein dim1
UV8b_3627	2222.81	1.47496	0.14649	5.88981	3.86636e-09	1.70686e-08	KDB15596.1	vesicle-associated membrane protein
UV8b_3628	1880.11	1.91633	0.0927281	12.0889	1.20882e-33	2.40016e-32	KDB15597.1	ATP-dependent RNA helicase SUV3 precursor
UV8b_3629	4687.14	1.15529	0.114294	5.91285	3.36229e-09	1.49934e-08	KDB15598.1	infection structure specific protein
UV8b_3637	26313.4	4.65042	0.170609	15.9448	3.09635e-57	1.58197e-55	KDB15606.1	class v chitinase
UV8b_3640	434.088	2.47772	0.174638	8.29929	1.04733e-16	8.75809e-16	KDB15609.1	extracellular SCP domain protein
UV8b_3648	6.17305	4.08005	0.976838	2.44326	0.0145551	0.0254289	KDB15617.1	hypothetical protein UV8b_3648
UV8b_3650	1062.44	4.93492	0.200033	14.4313	3.28657e-47	1.09278e-45	KDB15619.1	glycoside hydrolase family 16
UV8b_3653	1967.65	1.85286	0.138938	7.80098	6.14284e-15	4.50708e-14	KDB15622.1	glycosyl transferase
UV8b_3654	736.127	1.22041	0.117268	6.08769	1.1455e-09	5.32636e-09	KDB15623.1	calcineurin-like phosphoesterase
UV8b_3655	620.018	3.06721	0.143632	12.4916	8.29362e-36	1.81442e-34	KDB15624.1	hypothetical protein UV8b_3655
UV8b_3657	18194.2	2.3124	0.137585	9.83154	8.23525e-23	9.94282e-22	KDB15626.1	Peroxidase/catalase
UV8b_3660	1147.06	2.00423	0.238185	4.92222	8.55667e-07	2.88632e-06	KDB15629.1	xylitol dehydrogenase
UV8b_3662	5123.01	4.15305	0.112058	21.6796	3.1951e-104	4.53759e-102	KDB15631.1	G-protein coupled receptor
UV8b_3664	805.86	1.22017	0.133374	5.35154	8.72073e-08	3.32594e-07	KDB15633.1	U3 snoRNP-associated protein Utp11
UV8b_3671	1102.25	1.90117	0.194785	5.70942	1.13361e-08	4.7924e-08	KDB15640.1	cyclin-dependent kinases regulatory subunit
UV8b_3676	1881.76	1.20037	0.148962	4.71375	2.43204e-06	7.71897e-06	KDB15645.1	hypothetical protein UV8b_3676
UV8b_3677	959.952	2.76078	0.149914	10.7725	4.64196e-27	7.08469e-26	KDB15646.1	hypothetical protein UV8b_3677
UV8b_3690	190.791	1.07829	0.180414	3.49619	0.000471957	0.00107841	KDB15659.1	hypothetical protein UV8b_3690
UV8b_3691	1835.59	1.75114	0.104599	9.79317	1.20463e-22	1.44607e-21	KDB15660.1	G2/mitotic-specific cyclin-B
UV8b_3692	1484.17	1.76252	0.191778	5.37605	7.61371e-08	2.92505e-07	KDB15661.1	60S ribosomal protein L2 precursor
UV8b_3693	915.135	1.2477	0.201773	3.61724	0.000297761	0.000700431	KDB15662.1	cyclin-dependent kinase
UV8b_3696	2194.33	1.34738	0.117962	6.68155	2.36422e-11	1.29391e-10	KDB15665.1	alkaline foam protein B precursor
UV8b_3697	4156.51	1.19785	0.122288	5.72989	1.00496e-08	4.27559e-08	KDB15666.1	metacaspase CasA
UV8b_3698	530.598	3.10256	0.202582	8.95875	3.28365e-19	3.19185e-18	KDB15667.1	putative spindle-pole body protein (Pcp1)
UV8b_3700	734.997	1.1516	0.197587	3.40936	0.000651144	0.00145608	KDB15669.1	ubiquitin carboxyl-terminal hydrolase
UV8b_3702	3874.11	1.22124	0.138885	5.14369	2.69389e-07	9.65446e-07	KDB15276.1	vacuolar sorting-associated protein
UV8b_3703	2276.36	2.34961	0.209575	6.55818	5.44679e-11	2.87036e-10	KDB15277.1	hypothetical protein UV8b_3703
UV8b_3711	221.019	1.20103	0.254621	2.75923	0.00579381	0.0109585	KDB15285.1	RNA polymerase ii transcription factor b subunit 5
UV8b_3714	5519	1.47577	0.230354	3.74759	0.00017854	0.000436656	KDB15288.1	hypothetical protein UV8b_3714
UV8b_3718	9179.27	2.27739	0.209042	6.37281	1.85596e-10	9.25108e-10	KDB15292.1	60S ribosomal protein L22
UV8b_3721	1541.86	1.39147	0.152223	5.34714	8.93541e-08	3.40163e-07	KDB15295.1	putative ATP dependent RNA helicase (Dbp5)
UV8b_3724	43240.2	1.54508	0.13729	6.58327	4.60225e-11	2.43756e-10	KDB15298.1	ECM33-like protein
UV8b_3728	3373.21	1.31167	0.136381	5.62598	1.84457e-08	7.64372e-08	KDB15302.1	ESCRT-III component
UV8b_3731	152.831	3.46554	0.207283	9.77993	1.37306e-22	1.6459e-21	KDB15305.1	hypothetical protein UV8b_3731
UV8b_3733	1133.33	1.14502	0.220116	3.04292	0.00234295	0.00476262	KDB15307.1	serine/threonine protein kinase
UV8b_3742	2238.13	1.27968	0.143942	5.20045	1.98802e-07	7.23303e-07	KDB15316.1	mitochondrial outer membrane protein
UV8b_3756	1749.98	1.68654	0.09932	9.93315	2.98668e-23	3.70746e-22	KDB15330.1	putative BCS1 protein precursor
UV8b_3757	245.141	1.76242	0.157706	6.53719	6.26844e-11	3.27044e-10	KDB15331.1	hypothetical protein UV8b_3757
UV8b_3760	5423.26	1.34425	0.170445	4.61342	3.96104e-06	1.22924e-05	KDB15334.1	protein transport protein SEC13
UV8b_3774	6067.33	1.91477	0.0983509	11.3885	4.77227e-30	8.06187e-29	KDB15348.1	pre-mRNA splicing factor
UV8b_3776	901.361	1.50802	0.217632	4.05333	5.04938e-05	0.000133804	KDB15350.1	putative intermediate filament protein MDM1
UV8b_3787	2306.87	1.14899	0.0995842	6.7492	1.48668e-11	8.31011e-11	KDB15361.1	putative ubiquitin-conjugating enzyme spm2
UV8b_3788	765.819	1.45394	0.112825	7.53823	4.76407e-14	3.19857e-13	KDB15362.1	stomatin family protein
UV8b_3789	1349.54	1.40711	0.121243	6.78893	1.12966e-11	6.39124e-11	KDB15363.1	stomatin family protein
UV8b_3802	802.435	1.04561	0.137194	4.45824	8.26337e-06	2.46665e-05	KDB15376.1	hypothetical protein UV8b_3802
UV8b_3814	9367.43	1.30314	0.138812	5.49152	3.98499e-08	1.58774e-07	KDB15388.1	Aha1 domain family
UV8b_3857	2186.77	1.26369	0.138612	5.33297	9.66171e-08	3.64993e-07	KDB15431.1	DDT domain protein
UV8b_3862	6539.41	1.94944	0.236395	4.82393	1.40755e-06	4.60698e-06	KDB15436.1	Translationally-controlled tumor protein
UV8b_3874	2842.59	1.07627	0.0856393	7.3515	1.95994e-13	1.27108e-12	KDB15448.1	putative nuclear condensin complex subunit 3
UV8b_3892	819.115	1.15729	0.117191	5.77668	7.61879e-09	3.27878e-08	KDB15229.1	eukaryotic ribosome biogenesis protein 1
UV8b_3897	1495.57	1.73584	0.225338	4.50612	6.60222e-06	1.99856e-05	KDB15234.1	histone acetyltransferase ESA1
UV8b_3904	797.023	1.87576	0.118048	9.29495	1.4727e-20	1.58e-19	KDB15241.1	DNA replication licensing factor mcm6
UV8b_3908	1583.24	2.53494	0.125456	11.8196	3.08991e-32	5.80501e-31	KDB15245.1	class 2 chitin synthase
UV8b_3915	5158.5	1.88145	0.083763	13.1392	1.96235e-39	5.01298e-38	KDB15252.1	dihydrolipoamide acetyltransferase component
UV8b_3919	5676.77	7.48016	0.1138	38.4499	0	0	KDB15256.1	hypothetical protein UV8b_3919
UV8b_3921	47109.6	1.01891	0.111209	5.35948	8.34603e-08	3.1903e-07	KDB15258.1	allergen asp f4-like protein
UV8b_3925	2571.2	2.04277	0.135376	8.82682	1.0769e-18	1.01615e-17	KDB15262.1	glutaminyl-tRNA synthetase
UV8b_3936	1785.1	1.01879	0.135064	4.41239	1.02236e-05	3.00785e-05	KDB15273.1	sulphydryl oxidase
UV8b_3943	2141.91	1.31481	0.186863	4.11591	3.85653e-05	0.00010407	KDB15103.1	hypothetical protein UV8b_3943
UV8b_3946	5303.49	2.3073	0.174485	7.73523	1.03214e-14	7.39801e-14	KDB15106.1	histidyl-tRNA synthetase precursor
UV8b_3947	1348.91	1.01529	0.0992258	5.98539	2.15869e-09	9.77184e-09	KDB15107.1	3-ketoacyl-CoA reductase
UV8b_3963	643.425	1.14416	0.202577	3.3039	0.000953513	0.00207196	KDB15123.1	hypothetical protein UV8b_3963
UV8b_3996	3261.71	1.33197	0.127909	6.09146	1.11883e-09	5.21104e-09	KDB15156.1	elongation factor 1-beta
UV8b_3998	1437.96	1.17716	0.112449	6.12363	9.14663e-10	4.29594e-09	KDB15158.1	mitochondrial presequence protease
UV8b_4006	1382.11	1.16596	0.113287	6.02049	1.73892e-09	7.9533e-09	KDB15166.1	palmitoyltransferase PFA3
UV8b_4012	810.321	1.03799	0.147525	4.11582	3.85812e-05	0.00010408	KDB15172.1	hypothetical protein UV8b_4012
UV8b_4013	3064.18	1.63557	0.240263	3.98208	6.83151e-05	0.000177713	KDB15173.1	hypothetical protein UV8b_4013
UV8b_4015	1667.49	1.66261	0.124474	7.81339	5.56695e-15	4.0953e-14	KDB15175.1	CRAL/TRIO domain-containing protein
UV8b_4017	3170.96	1.0353	0.114708	5.27963	1.29448e-07	4.81636e-07	KDB15177.1	mevalonate kinase
UV8b_4018	3247.87	1.53245	0.16161	5.54686	2.90851e-08	1.17674e-07	KDB15178.1	glutamyl-tRNA synthetase
UV8b_4019	1529.81	2.69504	0.137919	11.4306	2.94206e-30	5.01047e-29	KDB15179.1	60S ribosomal protein L1 precursor
UV8b_4024	473.757	2.66629	0.1401	11.1326	8.70635e-29	1.38689e-27	KDB15184.1	putative NAD+ ADP-ribosyltransferase
UV8b_4030	1245.22	1.03534	0.19035	3.18168	0.00146425	0.00308033	KDB15190.1	NADH:ubiquinone oxidoreductase kd subunit
UV8b_4042	5739.95	1.46495	0.133267	6.43025	1.27391e-10	6.43794e-10	KDB15202.1	putative salicylate hydroxylase
UV8b_4043	5566.47	8.82853	0.199681	25.8631	1.73467e-147	4.68866e-145	KDB15203.1	hypothetical protein UV8b_4043
UV8b_4045	2744.99	2.11223	0.17211	7.179	7.0225e-13	4.38461e-12	KDB15205.1	monothiol glutaredoxin-5 precursor
UV8b_4048	4419.25	2.29217	0.130385	10.2837	8.34944e-25	1.12657e-23	KDB15208.1	branched-chain amino acid aminotransferase
UV8b_4062	1711.59	1.31831	0.134051	5.75274	8.78064e-09	3.76332e-08	KDB14916.1	N-acetyltransferase complex ARD1 subunit
UV8b_4063	4789.65	1.47239	0.111575	7.71942	1.16858e-14	8.33322e-14	KDB14917.1	methionyl-tRNA synthetase
UV8b_4065	4745.3	1.03532	0.182599	3.31667	0.000910972	0.00198803	KDB14919.1	NADH-ubiquinone oxidoreductase
UV8b_4067	4045.67	1.17313	0.129767	5.28825	1.23495e-07	4.60101e-07	KDB14921.1	ubiquinol-cytochrome C reductase-like protein
UV8b_4089	1363.89	3.9052	0.107678	21.215	6.93991e-100	8.81053e-98	KDB14943.1	cell wall protein
UV8b_4090	3452.49	2.08369	0.148642	8.20011	2.40173e-16	1.94248e-15	KDB14944.1	capsule polysaccharide biosynthesis protein
UV8b_4092	2652.2	1.53937	0.110452	8.15267	3.55966e-16	2.83252e-15	KDB14946.1	homoserine kinase
UV8b_4093	4196.94	2.21459	0.114913	11.2733	1.77819e-29	2.93297e-28	KDB14947.1	MSF1 domain-containing protein
UV8b_4095	4737.57	1.84958	0.13064	8.28177	1.21356e-16	1.00977e-15	KDB14949.1	putative MAP kinase
UV8b_4104	77.149	1.41907	0.222637	3.72849	0.000192628	0.000467699	KDB14958.1	hypothetical protein UV8b_4104
UV8b_4106	678.941	1.17116	0.135093	5.07122	3.95265e-07	1.38227e-06	KDB14960.1	adenosine deaminase family protein
UV8b_4119	3633.02	2.78136	0.245273	6.63339	3.28065e-11	1.76548e-10	KDB14973.1	putative cytochrome b5
UV8b_4127	2668.58	1.37217	0.22603	3.55115	0.000383557	0.000889516	KDB14981.1	ribosome biogenesis protein RLP24
UV8b_4136	1536.23	1.68292	0.146514	6.71913	1.82815e-11	1.01377e-10	KDB14990.1	ureidoglycolate hydrolase
UV8b_4137	11937	1.18215	0.230524	2.99975	0.002702	0.00542927	KDB14991.1	60S ribosomal protein L44
UV8b_4140	7448.97	1.49032	0.2339	3.72715	0.000193658	0.000470063	KDB14994.1	Multiprotein-bridging factor 1
UV8b_4144	2314.32	1.03406	0.14153	4.27391	1.92072e-05	5.43157e-05	KDB14998.1	putative RNA methyltransferase
UV8b_4150	2759.47	1.02019	0.131411	4.54125	5.59208e-06	1.7082e-05	KDB15004.1	ribose 5-phosphate isomerase A
UV8b_4153	985.924	1.1574	0.183512	3.68934	0.000224838	0.000539959	KDB15007.1	hypothetical protein UV8b_4153
UV8b_4162	1482.49	1.05875	0.136824	4.52645	5.99836e-06	1.82831e-05	KDB15016.1	progesterone binding protein
UV8b_4181	4686.42	2.075	0.160974	7.54032	4.68823e-14	3.1527e-13	KDB15035.1	LIM domain-containing protein
UV8b_4182	3070.28	2.38437	0.108282	12.8808	5.77025e-38	1.40549e-36	KDB15036.1	serum paraoxonase/arylesterase family protein
UV8b_4184	119.62	1.80324	0.225058	4.68692	2.77346e-06	8.7397e-06	KDB15038.1	hypothetical protein UV8b_4184
UV8b_4186	1041.18	1.17152	0.146869	4.66603	3.07078e-06	9.6512e-06	KDB15040.1	hypothetical protein UV8b_4186
UV8b_4193	765.851	1.045	0.111078	5.50322	3.72922e-08	1.49222e-07	KDB15047.1	60S ribosomal protein L19
UV8b_4196	2247.98	3.00648	0.127496	13.794	2.77154e-43	8.11982e-42	KDB15050.1	amidohydrolase
UV8b_4197	3.63183	3.82414	1.10373	2.02674	0.042689	0.0669081	KDB15051.1	hypothetical protein UV8b_4197
UV8b_4207	1738.85	3.18344	0.127317	14.6265	1.90464e-48	6.83179e-47	KDB15061.1	kinesin
UV8b_4213	337.139	2.94906	0.19464	8.86298	7.79055e-19	7.39264e-18	KDB15067.1	hypothetical protein UV8b_4213
UV8b_4215	282.832	2.33345	0.192775	7.0807	1.4343e-12	8.76585e-12	KDB15069.1	hypothetical protein UV8b_4215
UV8b_4216	235.559	2.41801	0.219932	6.43127	1.26541e-10	6.40789e-10	KDB15070.1	hypothetical protein UV8b_4216
UV8b_4217	146.742	1.10877	0.206417	3.14213	0.00167723	0.00349503	KDB15071.1	hypothetical protein UV8b_4217
UV8b_4218	407.388	1.05566	0.145489	4.24445	2.19131e-05	6.11043e-05	KDB15072.1	MRC1-like domain-containing protein
UV8b_4236	843.832	1.09411	0.109185	5.8617	4.58158e-09	2.0099e-08	KDB15090.1	putative threonine aldolase
UV8b_4238	2968.7	1.49911	0.25195	3.48054	0.000500407	0.00113814	KDB15092.1	putative siroheme synthase Met8
UV8b_4240	1446.99	1.85456	0.171102	6.34035	2.2925e-10	1.13528e-09	KDB15094.1	Swi6
UV8b_4249	2084.85	1.02511	0.185357	3.23512	0.00121591	0.00258712	KDB14726.1	short-chain dehydrogenase
UV8b_4252	2309.19	2.21536	0.0957544	13.5336	9.90399e-42	2.72979e-40	KDB14729.1	ascorbase/Cu-oxidase Lcc1
UV8b_4254	2902.17	3.08388	0.145096	12.4328	1.73426e-35	3.71646e-34	KDB14731.1	hypothetical protein UV8b_4254
UV8b_4259	1919.02	1.35908	0.21178	3.75395	0.00017407	0.000426223	KDB14736.1	Cytochrome c oxidase assembly protein COX16
UV8b_4260	785.305	1.03544	0.215679	2.80831	0.00498029	0.0095339	KDB14737.1	putative RNA binding protein
UV8b_4266	1224.37	1.44558	0.154948	5.45737	4.83246e-08	1.90278e-07	KDB14743.1	leucine rich repeat domain protein
UV8b_4278	3262.17	1.61224	0.183316	5.14467	2.6799e-07	9.60842e-07	KDB14755.1	SVP1-like protein 2
UV8b_4279	5305.91	1.70508	0.126915	7.85883	3.87723e-15	2.88264e-14	KDB14756.1	putative septin AspA
UV8b_4280	2117.46	1.90138	0.142025	7.83128	4.82936e-15	3.56208e-14	KDB14757.1	septin
UV8b_4288	1492.26	1.55743	0.137382	6.6314	3.3252e-11	1.78602e-10	KDB14765.1	major facilitator superfamily transporter
UV8b_4302	3385.37	1.12966	0.0872071	7.57745	3.52416e-14	2.39878e-13	KDB14779.1	CCCH zinc finger protein
UV8b_4306	143.036	1.37802	0.195804	4.11683	3.84119e-05	0.00010369	KDB14783.1	hypothetical protein UV8b_4306
UV8b_4315	3743.25	1.71239	0.123927	8.08285	6.32679e-16	4.91309e-15	KDB14792.1	hexokinase
UV8b_4316	2450.91	1.70459	0.104714	9.52235	1.69306e-21	1.90674e-20	KDB14793.1	oligosaccharyltransferase alpha subunit
UV8b_4318	124.243	1.79665	0.227176	4.62625	3.72341e-06	1.16066e-05	KDB14795.1	hypothetical protein UV8b_4318
UV8b_4323	16538.1	1.30647	0.0975027	7.8381	4.57418e-15	3.37683e-14	KDB14800.1	hypothetical protein UV8b_4323
UV8b_4324	13559.9	1.59078	0.111045	8.37989	5.29794e-17	4.48146e-16	KDB14801.1	calreticulin
UV8b_4328	7823.97	1.13673	0.182826	3.63702	0.000275805	0.000652448	KDB14805.1	putative oxidoreductase,short chain dehydrogenase
UV8b_4329	2257.62	1.81542	0.146004	7.27345	3.5041e-13	2.243e-12	KDB14806.1	IdgA domain protein
UV8b_4330	903.769	1.23568	0.153702	4.70278	2.56646e-06	8.11791e-06	KDB14807.1	WD domain, G-beta repeat containing protein
UV8b_4342	6893.66	1.26994	0.170166	4.36553	1.26815e-05	3.67549e-05	KDB14819.1	serine/threonine-protein kinase sck1
UV8b_4349	2117.71	1.65944	0.163551	5.93521	2.93466e-09	1.31354e-08	KDB14826.1	putative nucleoside hydrolase
UV8b_4350	603.442	2.10358	0.144235	8.53135	1.44647e-17	1.27445e-16	KDB14827.1	inosine-uridine preferring nucleoside hydrolase
UV8b_4354	2096.09	1.08364	0.159781	3.96724	7.27106e-05	0.000188795	KDB14831.1	rhomboid family protein
UV8b_4357	65.98	1.30251	0.288014	2.64541	0.00815913	0.0149498	KDB14834.1	hypothetical protein UV8b_4357
UV8b_4361	2674.63	1.68256	0.0934869	10.528	6.41507e-26	9.17268e-25	KDB14838.1	putative ribosomal protein DAP3
UV8b_4372	5.06206	4.11941	1.1586	2.07984	0.03754	0.0595848	KDB14849.1	hypothetical protein UV8b_4372
UV8b_4395	3190	1.65479	0.224657	4.30875	1.64181e-05	4.68874e-05	KDB14872.1	FK506-binding protein 2 precursor
UV8b_4399	2346.57	2.29059	0.252614	5.30418	1.13178e-07	4.23924e-07	KDB14876.1	UPF0041 domain-containing protein
UV8b_4401	5030.39	1.08141	0.210794	3.00096	0.00269128	0.00541033	KDB14878.1	putative glyoxal oxidase precursor
UV8b_4403	2881.57	1.48023	0.183316	4.72341	2.3192e-06	7.39162e-06	KDB14880.1	putative NF-X1 finger transcription factor
UV8b_4405	1878.09	1.91854	0.0959925	11.6913	1.41276e-31	2.55669e-30	KDB14882.1	zinc finger domain-containing lyar-type
UV8b_4406	1861.68	1.56175	0.103561	8.82152	1.1292e-18	1.06429e-17	KDB14883.1	putative protein-ER retention protein (Erd1)
UV8b_4410	1270.42	1.3567	0.0977657	8.11753	4.75764e-16	3.74664e-15	KDB14887.1	CTR2 long splice variant
UV8b_4423	8430.27	1.17705	0.148964	4.62209	3.79887e-06	1.1833e-05	KDB14900.1	40S ribosomal protein S13
UV8b_4425	491.671	1.19742	0.171252	4.09015	4.31103e-05	0.000115222	KDB14902.1	n-glycosylase DNA lyase
UV8b_4438	976.464	2.90726	0.114968	14.7923	1.64127e-49	6.13938e-48	KDB14582.1	shugoshin
UV8b_4439	447.516	1.67133	0.117892	8.29287	1.10548e-16	9.23512e-16	KDB14583.1	carboxylesterase family protein
UV8b_4452	21246	1.25939	0.204818	3.59684	0.000322102	0.000753249	KDB14596.1	Plasma membrane ATPase (Proton pump)
UV8b_4456	4291.18	2.15716	0.119297	10.5775	3.79119e-26	5.52459e-25	KDB14600.1	Citrate synthase precursor
UV8b_4457	1919.25	2.3614	0.107195	12.8861	5.3896e-38	1.3166e-36	KDB14601.1	Citrate synthase precursor
UV8b_4459	2408.49	1.05319	0.114605	5.37564	7.63099e-08	2.92766e-07	KDB14603.1	mitochondrial FOW-1 like protein
UV8b_4460	1809.53	1.35889	0.226032	3.51676	0.000436849	0.00100394	KDB14604.1	WD domain, G-beta repeat containing protein
UV8b_4463	620.099	1.82766	0.220621	4.84593	1.26021e-06	4.15886e-06	KDB14607.1	hypothetical protein UV8b_4463
UV8b_4473	751.641	1.80132	0.158992	6.62742	3.41594e-11	1.83123e-10	KDB14617.1	putative kinetochore protein SPC25
UV8b_4477	3233.88	1.17047	0.212362	3.22413	0.00126356	0.0026817	KDB14621.1	hypothetical protein UV8b_4477
UV8b_4484	1744.24	1.22003	0.209756	3.40239	0.000667999	0.00149042	KDB14628.1	hypothetical protein UV8b_4484
UV8b_4485	1159.93	1.36915	0.151711	5.27911	1.29811e-07	4.82774e-07	KDB14629.1	hypothetical protein UV8b_4485
UV8b_4501	475.214	1.2043	0.171064	4.11818	3.81885e-05	0.00010312	KDB14645.1	minichromosome loss protein
UV8b_4509	16297.6	4.47121	0.162484	16.0969	2.68331e-58	1.38787e-56	KDB14653.1	hypothetical protein UV8b_4509
UV8b_4514	7259.49	1.17325	0.080769	8.49719	1.94242e-17	1.70663e-16	KDB14658.1	putative succinyl-CoA ligase
UV8b_4516	177.869	1.82431	0.203534	5.24312	1.57888e-07	5.83051e-07	KDB14660.1	hypothetical protein UV8b_4516
UV8b_4517	1324.34	1.45016	0.20512	4.13558	3.54062e-05	9.60713e-05	KDB14661.1	hypothetical protein UV8b_4517
UV8b_4520	230.394	1.20308	0.179191	3.92742	8.5863e-05	0.000220486	KDB14664.1	hypothetical protein UV8b_4520
UV8b_4521	363.806	1.50638	0.126949	6.94114	3.88946e-12	2.279e-11	KDB14665.1	hypothetical protein UV8b_4521
UV8b_4522	163.105	1.27566	0.173402	4.30337	1.68216e-05	4.79268e-05	KDB14666.1	hypothetical protein UV8b_4522
UV8b_4523	1711.52	2.97941	0.115514	15.0877	1.95022e-51	8.25299e-50	KDB14667.1	hypothetical protein UV8b_4523
UV8b_4524	1230	1.05938	0.111646	5.55052	2.84817e-08	1.15345e-07	KDB14668.1	hypothetical protein UV8b_4524
UV8b_4530	1065.58	2.29774	0.268998	4.99666	5.83323e-07	2.00725e-06	KDB14674.1	putative eukaryotic translation initiation factor 3 subunit EifCk
UV8b_4531	4591.47	2.12915	0.229433	5.4285	5.68306e-08	2.21275e-07	KDB14675.1	putative eukaryotic translation initiation factor 3 subunit EifCk
UV8b_4533	3863.96	1.66979	0.108773	8.97981	2.71227e-19	2.64564e-18	KDB14677.1	T-complex protein 1 subunit zeta
UV8b_4535	3793.67	3.52603	0.142222	14.5027	1.16513e-47	3.93653e-46	KDB14679.1	hypothetical protein UV8b_4535
UV8b_4536	2720.73	1.39359	0.119242	6.83645	8.11783e-12	4.64612e-11	KDB14680.1	ribosomal protein subunit S4
UV8b_4537	1424.4	1.3857	0.130866	6.19398	5.86637e-10	2.80917e-09	KDB14681.1	37S ribosomal protein MRP4 precursor
UV8b_4539	3154.21	2.47471	0.10488	13.8026	2.45904e-43	7.22957e-42	KDB14683.1	T-complex protein 1 subunit eta
UV8b_4542	2570.29	1.85908	0.148748	7.31097	2.65228e-13	1.7095e-12	KDB14686.1	hypothetical protein UV8b_4542
UV8b_4543	1428.56	1.50673	0.170847	5.15888	2.48435e-07	8.93406e-07	KDB14687.1	kinesin
UV8b_4545	64.8062	4.95197	0.334912	8.64919	5.18661e-18	4.68304e-17	KDB14689.1	putative subtilisin-like protease
UV8b_4546	1120.64	5.16412	0.165932	18.2051	4.70044e-74	3.36624e-72	KDB14690.1	hypothetical protein UV8b_4546
UV8b_4547	718.33	1.98497	0.108113	10.74	6.60651e-27	9.93823e-26	KDB14691.1	DNA mismatch repair protein MSH2
UV8b_4550	1816.01	2.1926	0.157437	8.14667	3.74091e-16	2.96828e-15	KDB14694.1	hypothetical protein UV8b_4550
UV8b_4557	88.49	2.73012	0.24244	6.58727	4.47976e-11	2.3787e-10	KDB14701.1	hypothetical protein UV8b_4557
UV8b_4559	5761.56	1.90279	0.0926116	12.0186	2.83682e-33	5.52783e-32	KDB14703.1	serine-type carboxypeptidase
UV8b_4561	353.415	1.12599	0.129634	5.08092	3.75603e-07	1.31626e-06	KDB14705.1	DOC family protein
UV8b_4574	3907.91	4.58872	0.100561	26.6925	5.7569e-157	1.92948e-154	KDB14718.1	succinyl-CoA:3-ketoacid-coenzyme A transferase subunit A
UV8b_4577	2019.65	3.53508	0.240611	8.59433	8.37524e-18	7.45761e-17	KDB14527.1	hypothetical protein UV8b_4577
UV8b_4578	3891.17	1.90327	0.144268	7.71716	1.18948e-14	8.47501e-14	KDB14528.1	transport protein sec39
UV8b_4579	2838.7	1.57499	0.169788	5.42623	5.75566e-08	2.2379e-07	KDB14529.1	transport protein sec39
UV8b_4580	4350.76	1.27185	0.116933	6.36249	1.98515e-10	9.87742e-10	KDB14530.1	transformer-SR ribonucleoprotein
UV8b_4582	1006.26	1.02081	0.142961	4.17689	2.95521e-05	8.09472e-05	KDB14532.1	mtDNA inheritance protein
UV8b_4585	961.377	1.99934	0.112842	10.3643	3.60225e-25	4.93997e-24	KDB14535.1	putative replication factor C
UV8b_4588	1163.73	1.62269	0.122709	7.73548	1.03017e-14	7.39027e-14	KDB14538.1	putative nuclear pore complex component
UV8b_4598	1300.13	1.06681	0.156444	3.98893	6.63727e-05	0.000172874	KDB14548.1	sporulation protein RMD1
UV8b_4600	3629.28	1.01899	0.101639	5.8646	4.50224e-09	1.9782e-08	KDB14550.1	hypothetical protein UV8b_4600
UV8b_4613	715.671	1.19733	0.184297	3.80037	0.000144482	0.000357852	KDB14563.1	C6 transcription factor
UV8b_4630	4600.97	2.33368	0.147856	9.23276	2.63746e-20	2.78328e-19	KDB14359.1	serine/threonine-protein kinase Sgk2
UV8b_4633	529.956	2.92251	0.132226	12.9291	3.08492e-38	7.58022e-37	KDB14362.1	hypothetical protein UV8b_4633
UV8b_4641	2741.45	1.45517	0.162942	5.22409	1.75018e-07	6.42628e-07	KDB14370.1	putative oxidoreductase,short chain dehydrogenase
UV8b_4645	258.116	3.73319	0.267241	8.17156	3.04418e-16	2.43622e-15	KDB14374.1	aldehyde reductase ii
UV8b_4646	453.993	2.0403	0.178648	6.68073	2.37758e-11	1.30037e-10	KDB14375.1	short chain dehydrogenase reductase
UV8b_4652	32.2569	5.42864	0.563913	5.63128	1.7888e-08	7.42e-08	KDB14381.1	hypothetical protein UV8b_4652
UV8b_4653	628.129	3.59365	0.19522	10.7681	4.86912e-27	7.41789e-26	KDB14382.1	hypothetical protein UV8b_4653
UV8b_4654	180.795	6.65694	0.259383	15.0128	6.05657e-51	2.51228e-49	KDB14383.1	short-chain dehydrogenase/reductase
UV8b_4655	234.718	5.22309	0.183337	16.665	2.35341e-62	1.33238e-60	KDB14384.1	NAD(P)-binding domain protein
UV8b_4656	161.897	3.33953	0.20144	9.69768	3.0843e-22	3.62968e-21	KDB14385.1	cytochrome P450
UV8b_4659	1716.98	1.18454	0.251831	2.75149	0.00593245	0.0112031	KDB14388.1	putative U6 snRNA-associated protein LSm7
UV8b_4669	4017.78	1.14753	0.118523	5.66358	1.48251e-08	6.18316e-08	KDB14398.1	ubiquitin carboxyl-terminal hydrolase 14
UV8b_4670	2508.2	1.03892	0.148803	4.0841	4.42479e-05	0.000118074	KDB14399.1	ARP2/3 complex 20 kDa subunit
UV8b_4675	2635.68	2.31898	0.103411	13.1177	2.60862e-39	6.6035e-38	KDB14404.1	CRAL/TRIO domain protein
UV8b_4693	1911.25	1.3327	0.119959	6.49868	8.10258e-11	4.19265e-10	KDB14422.1	transesterase
UV8b_4696	87.1611	2.55488	0.228902	6.52904	6.6191e-11	3.44481e-10	KDB14425.1	hypothetical protein UV8b_4696
UV8b_4697	74.0818	2.47655	0.332823	4.35274	1.34447e-05	3.87924e-05	KDB14426.1	hypothetical protein UV8b_4697
UV8b_4700	3969.63	1.16678	0.119915	5.6917	1.25783e-08	5.28555e-08	KDB14429.1	PH domain protein
UV8b_4705	7235.08	1.07791	0.160674	3.92431	8.69796e-05	0.000223242	KDB14434.1	cutinase negative acting protein
UV8b_4706	3563.64	1.12945	0.200612	3.29335	0.000990004	0.00214514	KDB14435.1	ribosomal protein subunit L37
UV8b_4713	2316.28	2.29873	0.238997	5.62631	1.84106e-08	7.63296e-08	KDB14442.1	hypothetical protein UV8b_4713
UV8b_4718	2399.76	1.97497	0.132695	8.70631	3.13921e-18	2.86843e-17	KDB14447.1	hypothetical protein UV8b_4718
UV8b_4719	1491.67	1.71921	0.103263	9.73891	2.05741e-22	2.44525e-21	KDB14448.1	hypothetical protein UV8b_4719
UV8b_4738	27.9961	1.82872	0.432347	2.47425	0.0133516	0.0234731	KDB14467.1	hypothetical protein UV8b_4738
UV8b_4739	1132.5	4.00497	0.107509	21.7912	2.80992e-105	4.28079e-103	KDB14468.1	hypothetical protein UV8b_4739
UV8b_4741	1910.27	2.28502	0.0913874	14.6262	1.91172e-48	6.83179e-47	KDB14470.1	hypothetical protein UV8b_4741
UV8b_4747	2541.42	1.63761	0.11734	8.16377	3.24715e-16	2.5937e-15	KDB14476.1	protein HMF1
UV8b_4753	63159.3	7.08124	0.150006	27.6139	7.5767e-168	3.34132e-165	KDB14482.1	hypothetical protein UV8b_4753
UV8b_4755	2558.12	4.29904	0.14803	16.9883	1.00282e-64	6.04504e-63	KDB14484.1	hypothetical protein UV8b_4755
UV8b_4758	3985.69	2.90969	0.178899	9.5141	1.83296e-21	2.06153e-20	KDB14487.1	serine/threonine protein kinase
UV8b_4759	1725.92	1.40185	0.135127	6.06863	1.29009e-09	5.96558e-09	KDB14488.1	OPA3 domain protein
UV8b_4762	2080.22	1.29304	0.126017	6.00221	1.94653e-09	8.84968e-09	KDB14491.1	RNA binding protein
UV8b_4763	873.746	2.34592	0.157711	8.70116	3.28496e-18	2.99181e-17	KDB14492.1	wd-repeat protein
UV8b_4764	66.1129	2.7122	0.31492	5.03792	4.70626e-07	1.63662e-06	KDB14493.1	rho guanyl nucleotide exchange factor
UV8b_4767	253.041	1.00678	0.196291	3.00028	0.00269734	0.00542121	KDB14496.1	hypothetical protein UV8b_4767
UV8b_4772	6435.4	1.07492	0.115577	5.44039	5.31642e-08	2.0816e-07	KDB14501.1	14-3-3-like protein
UV8b_4777	859.863	1.09825	0.107236	5.99088	2.08707e-09	9.47128e-09	KDB14506.1	transducin family protein
UV8b_4780	100.805	1.37984	0.303049	2.66345	0.00773441	0.0142432	KDB14509.1	hypothetical protein UV8b_4780
UV8b_4781	266.915	1.82961	0.22756	4.70318	2.56146e-06	8.10515e-06	KDB14510.1	putative polysaccharide deacetylase (NodB)
UV8b_4787	3067.47	1.95157	0.17508	6.52045	7.00985e-11	3.63913e-10	KDB14516.1	putative 2-heptaprenyl-1,4-naphthoquinone methyltransferase
UV8b_4798	14683.2	5.3395	0.150053	20.8154	3.13934e-96	3.70487e-94	KDB14203.1	hypothetical protein UV8b_4798
UV8b_4800	650.365	1.4245	0.176762	4.71414	2.42734e-06	7.70989e-06	KDB14205.1	hypothetical protein UV8b_4800
UV8b_4806	1432.99	1.75952	0.11269	9.1335	6.63209e-20	6.76864e-19	KDB14211.1	putative acid sphingomyelinase
UV8b_4815	1097.35	1.11065	0.177875	3.65249	0.000259708	0.000617156	KDB14220.1	hypothetical protein UV8b_4815
UV8b_4820	249.473	1.67345	0.146959	6.66109	2.71796e-11	1.48074e-10	KDB14225.1	hypothetical protein UV8b_4820
UV8b_4831	32.9176	1.65377	0.322813	2.99676	0.00272862	0.0054775	KDB14236.1	hypothetical protein UV8b_4831
UV8b_4833	176.26	3.01927	0.193281	9.13777	6.37516e-20	6.52228e-19	KDB14238.1	hypothetical protein UV8b_4833
UV8b_4834	5368.68	1.36873	0.226208	3.53947	0.000400934	0.000926994	KDB14239.1	oligopeptide transporter 2
UV8b_4848	2823.84	2.77825	0.0937972	17.3264	2.97157e-67	1.90067e-65	KDB14253.1	AMP dependent CoA ligase
UV8b_4850	6423.38	2.82868	0.135215	12.2374	1.96318e-34	4.04163e-33	KDB14255.1	fumarylacetoacetate hydrolase
UV8b_4851	1517.08	1.72689	0.12257	8.24154	1.70003e-16	1.39653e-15	KDB14256.1	maleylacetoacetate isomerase
UV8b_4857	907.597	1.01181	0.253227	2.33732	0.0194225	0.0327974	KDB14262.1	putative thiamine pyrophosphokinase
UV8b_4858	1502.74	1.40284	0.224035	3.66286	0.000249417	0.000594218	KDB14263.1	mitochondrial intermembrane space protein Mia40
UV8b_4861	50.1209	2.13583	0.36477	3.42511	0.00061455	0.00137904	KDB14266.1	siderophore iron transporter mirB
UV8b_4873	7674.29	2.85974	0.114732	14.5804	3.74144e-48	1.30623e-46	KDB14278.1	malate dehydrogenase precursor
UV8b_4874	964.883	1.47221	0.138373	6.22367	4.85649e-10	2.3481e-09	KDB14279.1	C2HC5 finger protein
UV8b_4877	2264.37	1.0622	0.114002	5.45034	5.02738e-08	1.97396e-07	KDB14282.1	tripeptidyl peptidase precursor
UV8b_4878	4744.56	1.55957	0.129014	7.07128	1.53512e-12	9.34796e-12	KDB14283.1	aminotransferase family protein (LolT)
UV8b_4881	5058.74	2.00423	0.218176	5.37365	7.71603e-08	2.9575e-07	KDB14286.1	hypothetical protein UV8b_4881
UV8b_4882	1036.78	1.89367	0.106848	10.3673	3.492e-25	4.80451e-24	KDB14287.1	methyltransferase type 11
UV8b_4884	4951.51	1.58419	0.150819	6.1444	8.02682e-10	3.78698e-09	KDB14289.1	thiazole biosynthetic enzyme variant 1
UV8b_4888	904.979	2.06032	0.114798	10.4985	8.77802e-26	1.24452e-24	KDB14293.1	P-type Na+-ATPase
UV8b_4889	2542.57	1.16525	0.18912	3.60419	0.000313123	0.000733891	KDB14294.1	glycoside catalytic core
UV8b_4890	4157.66	2.74741	0.123374	13.0265	8.64619e-39	2.14975e-37	KDB14295.1	3-ketoacyl-CoA thiolase
UV8b_4891	1311.28	2.00674	0.141949	8.26961	1.34399e-16	1.11388e-15	KDB14296.1	TAM domain methyltransferase
UV8b_4892	612.242	1.06356	0.135651	4.58634	4.51092e-06	1.3896e-05	KDB14297.1	cytochrome P450
UV8b_4901	1904.42	2.01414	0.0901014	13.0763	4.49625e-39	1.13135e-37	KDB14306.1	steroid alpha reductase family protein
UV8b_4909	193.644	1.1885	0.164265	4.23235	2.31267e-05	6.42714e-05	KDB14314.1	acetyl-hydrolase
UV8b_4911	2579.61	2.76043	0.112911	14.301	2.15576e-46	6.92072e-45	KDB14316.1	putative kinetochore protein ndc-80
UV8b_4912	4029.3	1.70882	0.177883	5.61939	1.9163e-08	7.92531e-08	KDB14317.1	snRNP and snoRNP protein (Snu13)
UV8b_4933	5459.31	5.78156	0.206497	16.3779	2.74889e-60	1.47647e-58	KDB14338.1	2-oxoisovalerate dehydrogenase alpha subunit precursor
UV8b_4937	4044.22	1.11452	0.109708	5.94265	2.80453e-09	1.25866e-08	KDB14342.1	NADH-ubiquinone oxidoreductase-like protein
UV8b_4947	5483.77	1.11273	0.135675	4.79755	1.6062e-06	5.22451e-06	KDB14352.1	putative restin
UV8b_4963	93.3919	1.57894	0.278485	3.31659	0.000911222	0.00198803	KDB14173.1	hypothetical protein UV8b_4963
UV8b_4964	75.1904	1.16197	0.235073	2.89148	0.00383436	0.00748384	KDB14174.1	hypothetical protein UV8b_4964
UV8b_4968	1138.99	3.09699	0.239436	7.56619	3.84338e-14	2.60759e-13	KDB14178.1	hypothetical protein UV8b_4968
UV8b_4972	1841.7	1.9106	0.115643	9.66448	4.26776e-22	4.98044e-21	KDB14182.1	hypothetical protein UV8b_4972
UV8b_4975	11929.4	2.72097	0.133319	11.9388	7.43247e-33	1.42836e-31	KDB14185.1	hypothetical protein UV8b_4975
UV8b_4977	417.33	2.96401	0.171755	10.0948	5.82408e-24	7.55417e-23	KDB14187.1	hypothetical protein UV8b_4977
UV8b_4979	10574.3	1.79386	0.121829	8.61322	7.1037e-18	6.35918e-17	KDB14189.1	aminopeptidase 2
UV8b_4980	409.068	1.56049	0.141052	6.47157	9.69926e-11	4.99202e-10	KDB14190.1	serine threonine-protein kinase sgk2
UV8b_4981	146.581	1.48247	0.207067	4.18796	2.81479e-05	7.73029e-05	KDB14191.1	serine threonine-protein kinase sgk2
UV8b_4983	9569.94	1.09459	0.160346	3.99319	6.51897e-05	0.000170057	KDB14193.1	alpha/beta hydrolase fold protein
UV8b_4996	903.833	1.28865	0.193376	3.89817	9.69229e-05	0.000246245	KDB14007.1	Brix domain-containing protein-like protein
UV8b_5008	1556.51	1.40452	0.14483	5.67277	1.40506e-08	5.87476e-08	KDB14019.1	cation diffusion facilitator 10
UV8b_5015	17681.3	1.09056	0.285741	2.23257	0.0255775	0.0420306	KDB14026.1	60S ribosomal protein L9
UV8b_5016	539.352	1.59782	0.207354	4.50759	6.55673e-06	1.9855e-05	KDB14027.1	hypothetical protein UV8b_5016
UV8b_5017	1798.02	2.14954	0.108265	11.614	3.49701e-31	6.24765e-30	KDB14028.1	vacuolar ATP synthase subunit H
UV8b_5025	6058.39	2.05706	0.0854104	14.0885	4.47161e-45	1.38257e-43	KDB14036.1	delta 1-pyrroline-5-carboxylate dehydrogenase
UV8b_5028	1541.08	2.7945	0.179619	9.10083	8.9645e-20	9.07168e-19	KDB14039.1	putative checkpoint protein kinase
UV8b_5029	1564.94	1.24854	0.100406	7.27398	3.49051e-13	2.23601e-12	KDB14040.1	YmL49
UV8b_5033	480.702	1.27139	0.17489	4.2525	2.11397e-05	5.92604e-05	KDB14044.1	hypothetical protein UV8b_5033
UV8b_5034	2309.66	1.22046	0.105315	6.77892	1.21079e-11	6.8318e-11	KDB14045.1	N-acetylglucosamine-phosphate mutase
UV8b_5039	1125.4	1.09943	0.102316	6.28569	3.26395e-10	1.60027e-09	KDB14050.1	RNA-binding protein of the Puf family,translational repressor
UV8b_5049	54350.7	1.67482	0.0838535	11.6836	1.5468e-31	2.79325e-30	KDB14060.1	putative bleomycin hydrolase
UV8b_5050	1634.62	1.27816	0.114589	6.52487	6.80613e-11	3.53995e-10	KDB14061.1	serologically defined colon cancer antigen 1
UV8b_5060	3074.49	4.77768	0.187081	14.9388	1.84329e-50	7.35473e-49	KDB14071.1	stress responsive A/B barrel domain-containing protein
UV8b_5062	243.376	1.37178	0.18307	4.38325	1.16923e-05	3.40527e-05	KDB14073.1	hypothetical protein UV8b_5062
UV8b_5067	811.643	2.09976	0.158803	7.73465	1.03686e-14	7.41919e-14	KDB14078.1	putative cell wall protein
UV8b_5068	953.036	1.65368	0.150637	6.42169	1.34766e-10	6.79835e-10	KDB14079.1	beta-galactosidase
UV8b_5074	3858.99	1.31282	0.188129	4.08205	4.464e-05	0.000119083	KDB14085.1	Dienelactone hydrolase family
UV8b_5083	1626.95	1.95222	0.228515	4.99737	5.81179e-07	2.00152e-06	KDB14094.1	putative nuclear distribution protein RO10
UV8b_5085	2187.71	1.59571	0.250867	3.72082	0.000198576	0.000480887	KDB14096.1	ribosomal protein S16
UV8b_5090	2212.62	1.15124	0.116641	5.77356	7.76144e-09	3.33845e-08	KDB14101.1	N-(5-amino-5-carboxypentanoyl)-L-cysteinyl-D-valine synthase
UV8b_5091	63.2078	3.51346	0.319542	6.43183	1.26075e-10	6.3907e-10	KDB14102.1	hypothetical protein UV8b_5091
UV8b_5095	2212.39	1.31928	0.0992581	7.77496	7.5473e-15	5.48948e-14	KDB14106.1	Long-chain acyl-CoA synthetases family protein
UV8b_5096	1224.43	1.5481	0.128627	7.04037	1.91735e-12	1.15496e-11	KDB14107.1	hypothetical protein UV8b_5096
UV8b_5097	1457.36	1.62786	0.123042	7.7391	1.00124e-14	7.20737e-14	KDB14108.1	tyrosyl-tRNA synthetase
UV8b_5105	2544.21	1.23922	0.164827	4.39792	1.09294e-05	3.19866e-05	KDB14116.1	DUF1690 domain-containing protein
UV8b_5109	3400.74	1.27165	0.0920281	8.08308	6.3153e-16	4.90871e-15	KDB14120.1	hypothetical protein UV8b_5109
UV8b_5116	7545.64	1.89157	0.15893	6.96218	3.35047e-12	1.97701e-11	KDB14127.1	beta-Ig-H3/Fasciclin
UV8b_5117	998.743	1.15719	0.162432	4.16737	3.0814e-05	8.41614e-05	KDB14128.1	Nucleotide-binding, alpha-beta plait
UV8b_5121	130.677	2.01956	0.225732	5.23351	1.66324e-07	6.1151e-07	KDB14132.1	hypothetical protein UV8b_5121
UV8b_5122	3716.13	1.54429	0.159873	5.65044	1.60041e-08	6.65829e-08	KDB14133.1	synaptobrevin
UV8b_5126	96.9445	1.42004	0.243641	3.4094	0.000651059	0.00145608	KDB14137.1	hypothetical protein UV8b_5126
UV8b_5131	6992.22	2.55834	0.0780258	19.18	5.44e-82	4.60422e-80	KDB14142.1	2-isopropylmalate synthase
UV8b_5141	92.2587	1.89115	0.211259	5.23645	1.63696e-07	6.02375e-07	KDB14152.1	hypothetical protein UV8b_5141
UV8b_5142	14.9132	2.6823	0.526868	2.97806	0.00290079	0.00579397	KDB14153.1	hypothetical protein UV8b_5142
UV8b_5146	186.761	2.45053	0.221586	6.46911	9.85789e-11	5.07055e-10	KDB14157.1	hypothetical protein UV8b_5146
UV8b_5147	1017.89	2.59667	0.196348	7.73602	1.02578e-14	7.36508e-14	KDB14158.1	NIMA-like protein kinase
UV8b_5152	27.8611	2.41575	0.422828	3.34207	0.000831554	0.00182541	KDB13996.1	hypothetical protein UV8b_5152
UV8b_5153	614.253	1.2314	0.18518	3.88986	0.000100301	0.000254058	KDB13997.1	hypothetical protein UV8b_5153
UV8b_5156	1421.26	3.33655	0.13009	15.0031	7.00271e-51	2.89043e-49	KDB14000.1	peroxisomal carrier protein
UV8b_5163	1900.7	3.75755	0.117806	18.658	1.08708e-77	8.51276e-76	KDB13829.1	gleya domain-containing protein
UV8b_5169	3585.37	1.42855	0.108007	7.73699	1.01796e-14	7.32146e-14	KDB13835.1	glycerol-3-phosphate O-acyltransferase
UV8b_5177	671.664	1.11347	0.16717	3.89627	9.76866e-05	0.00024796	KDB13843.1	calcium/proton exchanger
UV8b_5183	2263.91	1.03053	0.089188	6.75901	1.38941e-11	7.80286e-11	KDB13849.1	Actin-like protein 3
UV8b_5184	714.014	1.60006	0.145787	6.42014	1.36152e-10	6.86412e-10	KDB13850.1	iron copper transporter
UV8b_5193	530.955	1.19406	0.173651	4.02233	5.76242e-05	0.000151169	KDB13859.1	amine oxidase
UV8b_5195	5924.73	1.09275	0.0940901	6.79368	1.09308e-11	6.20101e-11	KDB13861.1	amine oxidase
UV8b_5197	719.465	3.08327	0.140691	12.8195	1.27517e-37	3.00976e-36	KDB13863.1	hypothetical protein UV8b_5197
UV8b_5201	139.551	3.10581	0.309558	5.86896	4.38533e-09	1.9319e-08	KDB13867.1	hypothetical protein UV8b_5201
UV8b_5205	1426.42	1.1014	0.160632	4.01089	6.04892e-05	0.000158387	KDB13871.1	phosphatidylinositol n-acetylglucosaminyltransferase
UV8b_5206	1046.37	1.52858	0.152413	5.86669	4.4459e-09	1.95652e-08	KDB13872.1	putative pseudouridine synthase 3
UV8b_5214	9656.96	1.37052	0.1225	6.54454	5.96776e-11	3.12915e-10	KDB13880.1	protein mlo3-like protein
UV8b_5215	1507.19	5.39487	0.282058	11.1884	4.64483e-29	7.48443e-28	KDB13881.1	hypothetical protein UV8b_5215
UV8b_5216	952.485	1.26159	0.222418	3.31799	0.000906668	0.00197993	KDB13882.1	Oligosaccaryltransferase
UV8b_5219	1962.75	1.32058	0.116361	6.63874	3.16387e-11	1.70867e-10	KDB13885.1	mitochondrial carrier protein
UV8b_5228	2691.38	1.09177	0.177052	3.6071	0.000309635	0.000726324	KDB13894.1	heat shock protein 70-like protein
UV8b_5229	122.768	1.55013	0.227627	3.98358	6.78862e-05	0.000176761	KDB13895.1	endothiapepsin-like protein
UV8b_5236	3115.23	1.72172	0.223746	4.50128	6.75447e-06	2.04391e-05	KDB13902.1	ribosomal protein S15 precursor-like protein
UV8b_5237	6069.64	1.2635	0.132111	5.59455	2.21191e-08	9.07174e-08	KDB13903.1	40S ribosomal protein S0
UV8b_5240	581.482	2.16147	0.193238	6.54311	6.02531e-11	3.15538e-10	KDB13906.1	homocitrate synthase
UV8b_5241	928.435	1.07087	0.23337	2.68423	0.00726981	0.0134854	KDB13907.1	hypothetical protein UV8b_5241
UV8b_5248	138.02	1.27191	0.228595	3.25476	0.00113487	0.00242826	KDB13914.1	hypothetical protein UV8b_5248
UV8b_5250	1460.47	1.1026	0.171719	3.75604	0.000172622	0.000423048	KDB13916.1	pre-mRNA splicing factor ATP-dependent RNA helicase PRP43
UV8b_5252	1691.92	2.37748	0.113549	12.2479	1.72378e-34	3.57513e-33	KDB13918.1	hypothetical protein UV8b_5252
UV8b_5256	7634.68	2.33095	0.179591	7.59236	3.14141e-14	2.14872e-13	KDB13922.1	cyclophilin A
UV8b_5258	1470.01	1.11921	0.129586	5.05223	4.36693e-07	1.5227e-06	KDB13924.1	hypothetical protein UV8b_5258
UV8b_5262	525.577	1.04082	0.230061	2.64642	0.00813483	0.0149183	KDB13928.1	putative 50S ribosomal protein L30
UV8b_5264	26.6952	1.41438	0.379487	2.18021	0.0292419	0.0474565	KDB13930.1	hypothetical protein UV8b_5264
UV8b_5267	4214.97	2.82191	0.110538	14.9334	1.99808e-50	7.93454e-49	KDB13933.1	1,3-beta-glucanosyltransferase Gel2
UV8b_5269	719.741	1.33565	0.204303	3.82426	0.000131168	0.000327295	KDB13935.1	mitochondrial import inner membrane translocase subunit TIM16
UV8b_5276	2195.73	1.20618	0.215812	3.26939	0.00107778	0.00231974	KDB13942.1	hypothetical protein UV8b_5276
UV8b_5278	2688.11	1.21201	0.220181	3.22	0.00128189	0.00271716	KDB13944.1	xanthine phosphoribosyltransferase 1
UV8b_5280	1773.8	1.58648	0.149828	6.19396	5.8671e-10	2.80917e-09	KDB13946.1	hypothetical protein UV8b_5280
UV8b_5281	2100.3	1.46806	0.121873	7.04632	1.83705e-12	1.10898e-11	KDB13947.1	dolichol phosphate mannosyltransferase subunit 3
UV8b_5289	690.455	1.72718	0.113866	8.87304	7.11738e-19	6.76151e-18	KDB13955.1	5\\'-nucleotidase precursor
UV8b_5292	4029.45	3.64103	0.155073	13.7346	6.30407e-43	1.81518e-41	KDB13958.1	kinesin related protein 1
UV8b_5294	2860.74	1.39285	0.0917524	8.88006	6.68234e-19	6.36989e-18	KDB13960.1	dihydroxy-acid dehydratase
UV8b_5295	2772.75	1.39211	0.12934	6.29609	3.05246e-10	1.49834e-09	KDB13961.1	ATP-dependent Clp protease proteolytic subunit 1
UV8b_5302	207.664	2.60075	0.179041	8.49715	1.9431e-17	1.70663e-16	KDB13968.1	taurine catabolism dioxygenase
UV8b_5303	1260.33	2.34581	0.127836	10.7341	7.0392e-27	1.05512e-25	KDB13969.1	hypothetical protein UV8b_5303
UV8b_5311	1203.49	1.04637	0.128339	4.76931	1.84861e-06	5.9644e-06	KDB13977.1	chalcone-flavanone isomerase
UV8b_5318	5736.56	2.69197	0.129847	12.1273	7.56822e-34	1.52805e-32	KDB13984.1	IQ calmodulin-binding motif protein
UV8b_5319	6429.62	3.13864	0.0893811	20.5411	9.24107e-94	1.03241e-91	KDB13985.1	Kazal domain-containing protein
UV8b_5320	2812.48	2.24913	0.114767	11.4637	2.00724e-30	3.44645e-29	KDB13986.1	thioesterase family protein
UV8b_5328	4980.6	2.03212	0.124766	9.52754	1.61048e-21	1.81989e-20	KDB13994.1	DUF89 domain-containing protein
UV8b_5329	327.482	2.12481	0.141422	8.78882	1.5114e-18	1.40555e-17	KDB13722.1	hypothetical protein UV8b_5329
UV8b_5337	1727.44	1.9982	0.212616	5.49757	3.85057e-08	1.53711e-07	KDB13730.1	mitotic inducer phosphatase cdc25
UV8b_5338	1799.54	1.15786	0.102768	6.5906	4.38056e-11	2.33046e-10	KDB13731.1	DNA polymerase
UV8b_5339	2422.72	1.02174	0.138138	4.32668	1.51375e-05	4.34224e-05	KDB13732.1	hypothetical protein UV8b_5339
UV8b_5342	9982.75	2.46904	0.136873	10.5521	4.9692e-26	7.17878e-25	KDB13735.1	cytochrome c1, heme protein precursor
UV8b_5343	1867.27	2.76911	0.130124	12.4484	1.42756e-35	3.07494e-34	KDB13736.1	hypothetical protein UV8b_5343
UV8b_5345	4018.26	1.5659	0.178175	5.14099	2.73294e-07	9.77767e-07	KDB13738.1	T-complex protein 1
UV8b_5346	63.7599	3.28037	0.312618	6.13813	8.34968e-10	3.93266e-09	KDB13739.1	hypothetical protein UV8b_5346
UV8b_5348	1235.34	1.65671	0.144791	6.69315	2.18415e-11	1.19995e-10	KDB13741.1	transcription initiation protein
UV8b_5352	916.483	1.11177	0.118755	5.47637	4.34148e-08	1.71915e-07	KDB13745.1	putative oxidoreductase
UV8b_5353	3962.69	2.39054	0.123328	11.3387	8.43902e-30	1.41139e-28	KDB13746.1	CFEM domain-containing protein
UV8b_5364	12369.3	1.54744	0.168205	5.38149	7.38718e-08	2.84073e-07	KDB13757.1	60S ribosomal protein L30
UV8b_5370	5334.46	2.10507	0.207962	5.92122	3.19567e-09	1.42732e-08	KDB13763.1	calcofluor white hypersensitive protein
UV8b_5387	22367.8	1.12608	0.266796	2.46899	0.0135497	0.0237814	KDB13780.1	ribosomal protein S28
UV8b_5396	39161.5	2.45614	0.103744	13.849	1.28969e-43	3.80503e-42	KDB13789.1	ATP synthase protein 9 precursor (Lipid-binding protein)
UV8b_5400	1022.76	1.51307	0.178152	4.96815	6.7595e-07	2.30423e-06	KDB13793.1	prenylcysteine oxidase 1
UV8b_5414	570.351	1.27373	0.160351	4.64657	3.37493e-06	1.05596e-05	KDB13807.1	DNA polymerase epsilon
UV8b_5416	7121.5	1.18959	0.155538	4.47393	7.67965e-06	2.3072e-05	KDB13809.1	40S ribosomal protein S20
UV8b_5418	3653.64	1.17217	0.105459	6.50182	7.9355e-11	4.11203e-10	KDB13811.1	Cytochrome P450 family protein
UV8b_5420	1276.65	1.04835	0.227965	2.69009	0.00714325	0.0132565	KDB13813.1	U3 snoRNP protein
UV8b_5426	160.605	2.52409	0.179897	8.20747	2.25901e-16	1.83591e-15	KDB13819.1	hypothetical protein UV8b_5426
UV8b_5427	185.65	2.48106	0.232778	6.23481	4.52339e-10	2.19084e-09	KDB13820.1	hypothetical protein UV8b_5427
UV8b_5428	352.652	2.08451	0.148981	8.18467	2.73051e-16	2.19567e-15	KDB13821.1	hypothetical protein UV8b_5428
UV8b_5429	544.483	1.35978	0.198965	3.99779	6.39369e-05	0.000167154	KDB13822.1	glutamyl-tRNA(Gln) amidotransferase, B subunit
UV8b_5430	5689.39	2.97771	0.18794	9.26812	1.89455e-20	2.01197e-19	KDB13823.1	phenylalanyl-tRNA synthetase alpha chain
UV8b_5433	348.804	4.17802	0.143102	17.0786	2.14253e-65	1.30089e-63	KDB13601.1	hypothetical protein UV8b_5433
UV8b_5449	300.135	1.17392	0.196607	3.49274	0.000478085	0.00109152	KDB13617.1	C6 transcription factor
UV8b_5462	3159.03	1.45814	0.116744	7.30625	2.74695e-13	1.7678e-12	KDB13630.1	NADH-ubiquinone oxidoreductase 23 kDa subunit
UV8b_5463	7028.1	1.68059	0.153632	6.39896	1.56443e-10	7.8493e-10	KDB13631.1	putative acyl carrier protein
UV8b_5467	1127.02	2.93332	0.118443	14.4871	1.46278e-47	4.90266e-46	KDB13635.1	GAF domain nucleotide-binding protein
UV8b_5468	369.008	1.63162	0.160283	5.95467	2.60595e-09	1.17331e-08	KDB13636.1	hypothetical protein UV8b_5468
UV8b_5471	865.203	2.24708	0.187649	7.00486	2.47227e-12	1.47649e-11	KDB13639.1	putative cell cycle protein kinase
UV8b_5472	1710.72	1.03978	0.102988	5.90586	3.50809e-09	1.55443e-08	KDB13640.1	condensin complex component cnd1
UV8b_5476	39.6068	2.04074	0.313629	3.80627	0.000141079	0.00034963	KDB13644.1	hypothetical protein UV8b_5476
UV8b_5477	74.4606	1.97157	0.249728	4.61821	3.87073e-06	1.20389e-05	KDB13645.1	hypothetical protein UV8b_5477
UV8b_5479	375.18	1.42948	0.138097	6.05513	1.40309e-09	6.4699e-09	KDB13647.1	hypothetical protein UV8b_5479
UV8b_5481	249.164	1.40844	0.195221	4.22026	2.44021e-05	6.75917e-05	KDB13649.1	protein kinase-like protein
UV8b_5482	990.152	1.19617	0.125988	5.55379	2.79537e-08	1.13261e-07	KDB13650.1	protein kinase-like protein
UV8b_5484	651.205	3.36437	0.172618	11.4011	4.12848e-30	6.98838e-29	KDB13652.1	bifunctional D12/D15 fatty acid desaturase
UV8b_5485	1510.81	1.42413	0.201718	4.12984	3.63016e-05	9.83101e-05	KDB13653.1	NADH:ubiquinone oxidoreductase 14kD subunit
UV8b_5487	907.956	1.40879	0.125755	6.55316	5.63323e-11	2.96302e-10	KDB13655.1	hypothetical protein UV8b_5487
UV8b_5492	7306.95	1.65275	0.133983	7.2158	5.36185e-13	3.38305e-12	KDB13660.1	DUF614 domain protein
UV8b_5496	2462.12	1.09125	0.150214	4.24955	2.14196e-05	5.99449e-05	KDB13664.1	zinc finger protein
UV8b_5497	1248.96	2.39942	0.1094	12.8297	1.11745e-37	2.65997e-36	KDB13665.1	CFEM domain-containing protein
UV8b_5515	221.257	6.03981	0.269322	13.1184	2.584e-39	6.56102e-38	KDB13683.1	cyclopropane-fatty-acyl-phospholipid synthase
UV8b_5517	9.52297	2.23601	0.633483	2.06474	0.0389471	0.0616314	KDB13685.1	hypothetical protein UV8b_5517
UV8b_5518	131.689	4.21527	0.243538	10.1248	4.28792e-24	5.59633e-23	KDB13686.1	hypothetical protein UV8b_5518
UV8b_5521	6521.22	1.25982	0.139071	5.2991	1.16374e-07	4.3531e-07	KDB13689.1	subtilisin-like serine protease
UV8b_5534	578.224	3.0374	0.276213	6.43258	1.25458e-10	6.36329e-10	KDB13702.1	sulfatase domain protein
UV8b_5536	2633.46	1.63875	0.091226	10.508	7.93373e-26	1.12864e-24	KDB13704.1	pyruvate decarboxylase
UV8b_5538	245.771	1.55995	0.245574	3.71582	0.000202543	0.000489504	KDB13706.1	hypothetical protein UV8b_5538
UV8b_5539	1865.28	1.15618	0.0873086	7.74634	9.45769e-15	6.82566e-14	KDB13707.1	aminotriazole resistance
UV8b_5540	676.108	1.05296	0.150241	4.09969	4.13699e-05	0.000110864	KDB13708.1	glycoside hydrolase family 47 protein
UV8b_5542	46.8824	3.09889	0.309758	5.85209	4.8542e-09	2.12393e-08	KDB13710.1	fungal trichothecene efflux pump
UV8b_5543	2095.42	1.32816	0.162146	4.79152	1.65524e-06	5.37334e-06	KDB13711.1	hypothetical protein UV8b_5543
UV8b_5544	372.447	1.09983	0.155404	4.13993	3.47409e-05	9.43274e-05	KDB13712.1	hypothetical protein UV8b_5544
UV8b_5550	3105.36	1.64937	0.0976204	9.8834	4.91367e-23	5.98425e-22	KDB13718.1	glutamate-rich WD repeat containing protein 1
UV8b_5551	3640.15	1.14292	0.0848689	7.87762	3.33666e-15	2.49401e-14	KDB13719.1	thioredoxin M-type
UV8b_5554	767.624	2.07823	0.119086	10.2085	1.81712e-24	2.42061e-23	KDB13456.1	hypothetical protein UV8b_5554
UV8b_5555	2515.7	1.62847	0.115116	8.27509	1.28355e-16	1.06695e-15	KDB13457.1	hypothetical protein UV8b_5555
UV8b_5558	7271.23	1.59089	0.297294	3.13028	0.00174637	0.00362558	KDB13460.1	60S ribosomal protein L11
UV8b_5559	20716.9	2.85488	0.112455	14.8504	6.91576e-50	2.62204e-48	KDB13461.1	ATP synthase alpha chain precursor
UV8b_5570	4643.87	1.33571	0.194876	4.00942	6.08677e-05	0.000159328	KDB13472.1	putative PWI domain mRNA processing protein
UV8b_5574	847.245	1.05558	0.16483	3.74613	0.00017958	0.000438433	KDB13476.1	RNA-3\\'-phosphate cyclase family protein
UV8b_5582	22335.1	1.31491	0.165733	4.64103	3.46675e-06	1.08347e-05	KDB13484.1	6-phosphogluconate dehydrogenase
UV8b_5589	1513.67	2.19305	0.214657	5.97628	2.28293e-09	1.03064e-08	KDB13491.1	Ubiquitin-NEDD8-like protein
UV8b_5590	6371.91	2.65589	0.156723	9.91302	3.65433e-23	4.50289e-22	KDB13492.1	prohibitin-2
UV8b_5593	1055.08	1.36689	0.120049	6.66043	2.73022e-11	1.48452e-10	KDB13495.1	hypothetical protein UV8b_5593
UV8b_5594	3786.99	1.11921	0.250762	2.61083	0.0090324	0.0164064	KDB13496.1	26S proteasome regulatory subunit S5A
UV8b_5601	2785.7	1.84899	0.101726	10.6324	2.10617e-26	3.10151e-25	KDB13503.1	glycoside hydrolase family 55 protein
UV8b_5606	278.841	2.22959	0.187363	6.96095	3.37985e-12	1.99154e-11	KDB13508.1	ferric reductase
UV8b_5607	126.287	3.37285	0.251481	7.84548	4.31316e-15	3.19258e-14	KDB13509.1	Ctr copper transporter
UV8b_5609	886.741	1.35617	0.198584	3.99483	6.47406e-05	0.000169044	KDB13511.1	rRNA-processing protein UTP23
UV8b_5612	693.049	1.15784	0.117092	5.7843	7.28141e-09	3.13842e-08	KDB13514.1	Golgi apparatus membrane protein tvp-23
UV8b_5620	5295.11	1.97359	0.132362	8.72206	2.73183e-18	2.50438e-17	KDB13522.1	mRNA splicing factor RNA helicase
UV8b_5621	2506.07	2.05418	0.130004	9.24292	2.3985e-20	2.54072e-19	KDB13523.1	cytochrome c peroxidase precursor
UV8b_5623	12594.3	1.15951	0.184096	3.6843	0.00022933	0.000549644	KDB13525.1	protein disulfide isomerase
UV8b_5624	1153.53	1.37403	0.111084	7.23553	4.63731e-13	2.94364e-12	KDB13526.1	hypothetical protein UV8b_5624
UV8b_5626	1571.36	2.35031	0.109123	12.5991	2.13692e-36	4.80034e-35	KDB13528.1	threonyl-tRNA synthetase
UV8b_5627	2380.75	5.31817	0.1083	28.7252	1.84772e-181	1.03214e-178	KDB13529.1	hypothetical protein UV8b_5627
UV8b_5628	2018.03	1.19556	0.176614	3.95982	7.50052e-05	0.000194151	KDB13530.1	WD domain containing protein
UV8b_5629	18170.8	1.53567	0.285877	3.14229	0.00167632	0.003494	KDB13531.1	exo-beta-1,3-glucanase
UV8b_5646	2934.18	1.60253	0.103986	9.01485	1.9714e-19	1.93877e-18	KDB13548.1	mitochondrial phosphate carrier protein 2
UV8b_5648	6596.2	1.71599	0.247655	4.05318	5.05272e-05	0.000133808	KDB13550.1	hypothetical protein UV8b_5648
UV8b_5650	4184.34	1.79513	0.210287	4.99357	5.9272e-07	2.03624e-06	KDB13552.1	F-actin capping protein beta subunit
UV8b_5659	5251.52	1.16369	0.161388	4.21788	2.46609e-05	6.82411e-05	KDB13561.1	carbamoyl-phosphate synthase arginine-specific large chain
UV8b_5674	7471.55	1.42633	0.170143	4.90379	9.40051e-07	3.1532e-06	KDB13576.1	HMG box protein
UV8b_5675	2386.99	1.17982	0.0944271	7.30881	2.6951e-13	1.73576e-12	KDB13577.1	20S proteasome subunit
UV8b_5679	4168.52	1.88912	0.287919	3.83812	0.000123982	0.000310195	KDB13581.1	hypothetical protein UV8b_5679
UV8b_5684	3534.45	1.55033	0.14593	6.2145	5.14869e-10	2.48221e-09	KDB13586.1	mitochondrial import inner membrane translocase subunit tim-54
UV8b_5685	4289.96	1.37128	0.142588	5.62565	1.84812e-08	7.65467e-08	KDB13587.1	putative serine/threonine kinase
UV8b_5689	3913.6	1.34944	0.204313	3.86356	0.000111748	0.000281012	KDB13591.1	RSC complex subunit Rsc7
UV8b_5692	7812.97	2.05368	0.188489	6.37345	1.84823e-10	9.21806e-10	KDB13594.1	PCI domain-containing protein
UV8b_5700	4614.12	2.75111	0.101271	15.8909	7.32289e-57	3.69629e-55	KDB13321.1	putative methylglutaconyl-CoA hydratase precursor
UV8b_5705	1049.15	1.82391	0.258377	4.12931	3.63856e-05	9.85056e-05	KDB13326.1	Sec7 domain-containing protein
UV8b_5710	2190.74	2.15872	0.279085	4.52468	6.04869e-06	1.84231e-05	KDB13331.1	putative transcription regulator BDF1
UV8b_5722	1851.92	1.23702	0.117864	6.13934	8.28625e-10	3.90498e-09	KDB13343.1	pyruvate dehydrogenase kinase
UV8b_5724	36.8159	1.35912	0.330946	2.40231	0.0162921	0.0280946	KDB13345.1	hypothetical protein UV8b_5724
UV8b_5731	5184.61	1.66033	0.171134	5.67526	1.38478e-08	5.79283e-08	KDB13352.1	ERV25 protein
UV8b_5732	5047.3	2.0031	0.0942787	12.4284	1.83199e-35	3.91588e-34	KDB13353.1	TPR repeat protein
UV8b_5735	468.277	1.66353	0.173484	5.60916	2.03315e-08	8.3796e-08	KDB13356.1	glutathione s-transferase
UV8b_5746	3589.22	1.27817	0.121563	6.15054	7.72205e-10	3.64936e-09	KDB13367.1	phosphomannomutase
UV8b_5749	4215.88	1.98792	0.159654	7.28362	3.24978e-13	2.08658e-12	KDB13370.1	DnaJ domain or J-domain containing protein
UV8b_5757	8813.57	1.69833	0.0956519	10.3862	2.86618e-25	3.95646e-24	KDB13378.1	60S acidic ribosomal protein P0
UV8b_5760	766.576	1.21321	0.20075	3.53517	0.000407509	0.000941156	KDB13381.1	putative serine/threonine protein kinase
UV8b_5774	3229.11	1.13276	0.149584	4.42977	9.43329e-06	2.792e-05	KDB13395.1	putative mitochondrial ATPase inhibitor
UV8b_5778	483.972	1.57282	0.172042	5.34775	8.90537e-08	3.39173e-07	KDB13399.1	ribosomal protein MRPL25
UV8b_5780	3692.11	1.15618	0.109876	6.15533	7.49208e-10	3.54667e-09	KDB13401.1	valyl-tRNA synthetase
UV8b_5788	3708.04	1.44148	0.148684	5.67117	1.41827e-08	5.92702e-08	KDB13409.1	putative splicing factor U2AF 23 kDa subunit
UV8b_5804	7958.19	2.30593	0.126666	10.6492	1.75942e-26	2.60463e-25	KDB13425.1	ATP synthase gamma chain precursor
UV8b_5809	1036.62	1.22049	0.181243	3.93913	8.17786e-05	0.000210449	KDB13430.1	MDR efflux pump ABC3
UV8b_5810	7967.2	1.78507	0.137402	7.59959	2.97076e-14	2.03699e-13	KDB13431.1	MDR efflux pump ABC3
UV8b_5816	3614.09	1.95781	0.134827	8.49419	1.99315e-17	1.74875e-16	KDB13437.1	proteasome component PRE2 precursor
UV8b_5828	73.6374	2.09926	0.247702	4.95753	7.13937e-07	2.42484e-06	KDB13449.1	hypothetical protein UV8b_5828
UV8b_5832	621.43	1.05728	0.148634	4.16099	3.16867e-05	8.64267e-05	KDB13453.1	ThiJ/PfpI family protein
UV8b_5833	15842.6	1.90381	0.0798472	13.9473	3.26518e-44	9.87687e-43	KDB13454.1	carboxypeptidase Y precursor
UV8b_5838	1989.8	1.22765	0.0896266	8.01247	1.12426e-15	8.59505e-15	KDB13248.1	heat shock 70 kd protein cognate 1
UV8b_5839	4523.23	2.15114	0.130776	9.62209	6.45088e-22	7.43493e-21	KDB13249.1	Oestrogen-responsive protein Fam102A B domain-containing protein
UV8b_5840	844.488	1.59198	0.11387	8.17818	2.88164e-16	2.31055e-15	KDB13250.1	putative ribonuclease P complex subunit Pop1
UV8b_5842	10267.4	1.59434	0.227488	4.09967	4.13737e-05	0.000110864	KDB13252.1	IBR domain-containing protein
UV8b_5846	684.067	1.04879	0.128894	4.75974	1.93843e-06	6.23337e-06	KDB13256.1	hypothetical protein UV8b_5846
UV8b_5847	51.2619	4.59838	0.376792	7.1389	9.40789e-13	5.82191e-12	KDB13257.1	hypothetical protein UV8b_5847
UV8b_5848	778.287	3.42524	0.140195	14.2918	2.46254e-46	7.87542e-45	KDB13258.1	serine/threonine-protein kinase sid2
UV8b_5852	3827.33	2.3922	0.177937	7.86427	3.71259e-15	2.76514e-14	KDB13262.1	DNA-directed RNA polymerase III complex subunit Rpc37
UV8b_5855	2560.01	1.73977	0.10043	10.1334	3.9263e-24	5.1565e-23	KDB13265.1	37S ribosomal protein S12
UV8b_5856	6918.26	1.78468	0.086101	12.125	7.78788e-34	1.56862e-32	KDB13266.1	acyl-CoA dehydrogenase precursor
UV8b_5858	922.705	1.14365	0.19668	3.40144	0.000670318	0.00149429	KDB13268.1	mitochondrial inner membrane protein
UV8b_5859	2528.07	1.68007	0.20204	4.86429	1.14866e-06	3.80569e-06	KDB13269.1	phosphoserine phosphatase
UV8b_5864	1515.61	1.28057	0.184913	4.05101	5.09972e-05	0.000134882	KDB13274.1	thioredoxin
UV8b_5865	853.374	1.62828	0.108781	8.75599	2.02319e-18	1.86699e-17	KDB13275.1	putative kinetochore protein nuf2
UV8b_5868	4624.42	5.84247	0.124601	27.4285	1.25494e-165	5.0072e-163	KDB13278.1	putative 3-hydroxyisobutyrate dehydrogenase G6G8.5
UV8b_5880	3330.29	1.37221	0.14478	5.54421	2.95288e-08	1.19239e-07	KDB13290.1	Ubiquitin-conjugating enzyme E2
UV8b_5881	4700.37	1.54418	0.160263	5.63629	1.73753e-08	7.21089e-08	KDB13291.1	acetyl-CoA acetyltransferase
UV8b_5893	164.192	2.20574	0.230884	5.58841	2.29161e-08	9.38487e-08	KDB13303.1	hypothetical protein UV8b_5893
UV8b_5903	4949.95	1.07403	0.140201	4.4812	7.42248e-06	2.23394e-05	KDB13313.1	proteasome maturation factor
UV8b_5909	374.82	1.49302	0.190416	4.5866	4.50515e-06	1.38833e-05	KDB13319.1	hypothetical protein UV8b_5909
UV8b_5910	3670.43	1.4666	0.12496	6.86548	6.62669e-12	3.81878e-11	KDB13150.1	isocitrate dehydrogenase subunit 2 precursor
UV8b_5920	7045.22	1.15756	0.246442	2.74763	0.00600268	0.011328	KDB13160.1	putative proteasome subunit beta type-2
UV8b_5923	8501.73	2.64229	0.124641	12.4007	2.59056e-35	5.46758e-34	KDB13163.1	mannose-1-phosphate guanylyltransferase (GDP)
UV8b_5924	1007.09	1.64444	0.125619	7.65757	1.8948e-14	1.31976e-13	KDB13164.1	fermentation associated protein
UV8b_5936	651.96	1.37716	0.150676	5.34646	8.96896e-08	3.41285e-07	KDB13176.1	putative DNA repair protein Nse1
UV8b_5944	10664.3	2.76349	0.0853211	18.9465	4.7188e-80	3.87635e-78	KDB13184.1	RNP domain protein
UV8b_5946	5297.82	1.02097	0.228587	2.6127	0.00898298	0.0163272	KDB13186.1	electron transfer flavoprotein beta-subunit
UV8b_5947	8047.45	1.11915	0.127291	5.14301	2.70373e-07	9.68556e-07	KDB13187.1	Carbamoyl-phosphate synthase
UV8b_5950	191.875	3.29319	0.194253	9.91693	3.514e-23	4.34916e-22	KDB13190.1	hypothetical protein UV8b_5950
UV8b_5951	59.1029	2.44657	0.29922	4.78293	1.72756e-06	5.59538e-06	KDB13191.1	integral membrane protein
UV8b_5955	6719.67	1.18552	0.190736	3.63582	0.000277094	0.000654757	KDB13195.1	hypothetical protein UV8b_5955
UV8b_5956	37.6118	2.42473	0.378237	3.74996	0.000176862	0.00043268	KDB13196.1	hypothetical protein UV8b_5956
UV8b_5960	99.1667	1.95788	0.224702	5.0969	3.45268e-07	1.21657e-06	KDB13200.1	XLF family protein
UV8b_5970	1820.57	1.6411	0.112315	8.54725	1.26054e-17	1.11297e-16	KDB13210.1	oxalate decarboxylase oxdC
UV8b_5971	1489.43	2.03458	0.129374	9.19931	3.60263e-20	3.74987e-19	KDB13211.1	DUF1275 domain protein
UV8b_5982	891.397	1.07893	0.149338	4.22621	2.37664e-05	6.59182e-05	KDB13222.1	pyrazinamidase nicotinamidase
UV8b_5988	3104.24	1.12679	0.195354	3.37404	0.000740727	0.00163978	KDB13228.1	WD repeat-containing protein
UV8b_5990	1237.11	2.63978	0.116122	13.2979	2.38169e-40	6.31524e-39	KDB13230.1	clavaminate synthase-like protein
UV8b_5992	907.413	2.08958	0.110019	11.1101	1.11989e-28	1.77719e-27	KDB13232.1	immunoglobulin variable region used by the ITC63b heavy chain
UV8b_5994	3384.35	1.06477	0.122787	5.07263	3.92357e-07	1.37268e-06	KDB13234.1	thioredoxin-like protein
UV8b_5995	854.698	2.34109	0.131812	10.3894	2.77097e-25	3.83135e-24	KDB13235.1	lysine methyltransferase
UV8b_5997	735.902	2.19641	0.196388	6.54223	6.06066e-11	3.16993e-10	KDB13237.1	kinesin
UV8b_6001	2964.33	1.18653	0.102285	6.78573	1.15499e-11	6.53016e-11	KDB13241.1	squalene synthase
UV8b_6006	17.824	6.59002	0.671195	5.74336	9.28148e-09	3.96581e-08	KDB13135.1	cell surface glycoprotein
UV8b_6008	2823.39	1.89165	0.101487	10.9033	1.11177e-27	1.71872e-26	KDB13137.1	peroxisomal copper amine oxidase
UV8b_6009	1392.9	1.74727	0.149094	6.85534	7.11451e-12	4.09426e-11	KDB13138.1	fungal specific transcription factor domain protein
UV8b_6014	251.938	6.39736	0.212917	17.576	3.76513e-69	2.46469e-67	KDB13143.1	hypothetical protein UV8b_6014
UV8b_6015	319.668	3.82552	0.180076	12.4269	1.86718e-35	3.98095e-34	KDB13144.1	glyoxalase bleomycin resistance protein dioxygenase superfamily
UV8b_6016	431.65	2.60827	0.216081	7.06096	1.65352e-12	1.0047e-11	KDB13145.1	3-oxoacyl-(acyl-carrier-protein) reductase
UV8b_6017	2195.75	1.84015	0.224426	4.79632	1.61608e-06	5.25256e-06	KDB13146.1	salicylate 1-monooxygenase
UV8b_6028	1066.29	1.62952	0.130111	7.32615	2.3685e-13	1.53012e-12	KDB13028.1	putative MAK16 protein
UV8b_6029	1241.89	1.04494	0.246352	2.4812	0.0130941	0.0230446	KDB13029.1	hypercellular protein
UV8b_6035	1102.08	1.52976	0.1725	5.18753	2.13107e-07	7.72664e-07	KDB13035.1	Mechanosensitive ion channel family protein
UV8b_6036	2076.47	1.16745	0.146038	4.67631	2.92089e-06	9.1939e-06	KDB13036.1	glucosidase II alpha subunit
UV8b_6037	20380.2	2.11399	0.170308	7.26099	3.84267e-13	2.45597e-12	KDB13037.1	nucleoside diphosphate kinase A
UV8b_6042	4535.09	1.40045	0.231087	3.54504	0.000392557	0.000908879	KDB13042.1	putative GCN4 translational repressor GCD14 protein
UV8b_6043	3218.66	1.02742	0.101259	5.93531	2.93296e-09	1.31348e-08	KDB13043.1	cysteinyl-tRNA synthetase
UV8b_6044	3667.53	4.98367	0.113377	25.7131	8.35316e-146	2.18722e-143	KDB13044.1	hypothetical protein UV8b_6044
UV8b_6062	3270.76	1.47737	0.200469	4.31093	1.62572e-05	4.64752e-05	KDB13062.1	proteasome component PRE3 precursor
UV8b_6063	3229.47	2.07384	0.103545	11.7159	1.0565e-31	1.92862e-30	KDB13063.1	ERV2 protein-like protein
UV8b_6075	3015.29	2.48105	0.196263	7.39476	1.41659e-13	9.27313e-13	KDB13075.1	3-hydroxybutyryl-CoA dehydrogenase
UV8b_6078	4075.88	1.63193	0.0891042	10.7135	8.79816e-27	1.31642e-25	KDB13078.1	matrix AAA protease MAP-1
UV8b_6082	1551.08	1.20976	0.100492	7.04198	1.89525e-12	1.14247e-11	KDB13082.1	Ribosome biogenesis protein YTM1
UV8b_6084	535.405	1.00193	0.178178	3.28935	0.00100419	0.00217363	KDB13084.1	hypothetical protein UV8b_6084
UV8b_6091	2994.34	1.45009	0.102612	8.26655	1.37897e-16	1.14174e-15	KDB13091.1	cytochrome-c oxidase chain VI
UV8b_6104	14098.4	1.34686	0.0972425	8.10207	5.40335e-16	4.23524e-15	KDB13104.1	actin
UV8b_6108	1992.8	1.78723	0.118566	8.81755	1.16991e-18	1.09895e-17	KDB13108.1	mitochondrial import receptor subunit TOM40
UV8b_6109	5706.29	2.39764	0.0855225	16.3995	1.92752e-60	1.04198e-58	KDB13109.1	putative 6-phosphofructo-2-kinase/fructose-2, 6-bisphosphate 2-phosphatase
UV8b_6110	54.6266	1.41933	0.368539	2.25283	0.0242701	0.0401737	KDB13110.1	hypothetical protein UV8b_6110
UV8b_6111	2731.01	2.17336	0.131773	9.64793	5.01603e-22	5.80516e-21	KDB13111.1	protein kinase gsk3
UV8b_6112	2831.38	2.12357	0.0946253	13.1277	2.28623e-39	5.8226e-38	KDB13112.1	protein kinase gsk3
UV8b_6113	3834.78	1.01031	0.0951167	6.21334	5.18709e-10	2.49785e-09	KDB13113.1	mitochondrion protein
UV8b_6127	950.02	1.4745	0.123971	6.95752	3.46309e-12	2.03916e-11	KDB13127.1	conjugation with cellular fusion-related protein
UV8b_6130	1147.05	4.08753	0.12387	19.303	5.07061e-83	4.33537e-81	KDB13130.1	ABC1 domain-containing protein
UV8b_6132	587.098	1.46362	0.219037	3.90875	9.27755e-05	0.000236497	KDB13132.1	alcohol dehydrogenase
UV8b_6137	1901.37	1.28645	0.121851	6.17576	6.58455e-10	3.13299e-09	KDB12935.1	putative small nucleolar ribonucleoprotein complex subunit Utp15
UV8b_6138	3208.95	2.42472	0.236785	5.9901	2.09714e-09	9.50863e-09	KDB12936.1	dynactin subunit 5
UV8b_6144	148443	2.21863	0.165257	7.85329	4.0526e-15	3.00768e-14	KDB12942.1	hypothetical protein UV8b_6144
UV8b_6150	1299.24	1.0906	0.138061	4.62085	3.8217e-06	1.18953e-05	KDB12948.1	hypothetical protein UV8b_6150
UV8b_6151	2866.6	1.64949	0.115697	8.33978	7.44286e-17	6.26142e-16	KDB12949.1	amidohydrolase family protein
UV8b_6154	405.778	6.8638	0.280074	14.3357	1.30898e-46	4.21844e-45	KDB12952.1	serine threonine-protein kinase
UV8b_6155	571.519	5.29861	0.153336	20.2138	7.40796e-91	7.75892e-89	KDB12953.1	dipeptidyl peptidase III
UV8b_6156	988.853	5.9888	0.172827	20.2701	2.3627e-91	2.57105e-89	KDB12954.1	NB-ARC and TPR domain protein
UV8b_6160	2467.17	1.67937	0.206423	4.75901	1.94546e-06	6.25279e-06	KDB12958.1	putative proteasome subunit alpha type 2
UV8b_6163	1748.87	1.143	0.148576	4.50014	6.79098e-06	2.05315e-05	KDB12961.1	nicotinamide riboside kinase 1
UV8b_6168	1440.1	1.75195	0.18301	5.59981	2.14585e-08	8.8181e-08	KDB12966.1	KOW motif containing protein
UV8b_6169	3713.53	1.69118	0.142517	6.94147	3.8805e-12	2.27535e-11	KDB12967.1	small GTPase-binding protein
UV8b_6170	48099	2.90507	0.0835325	20.3437	5.28249e-92	5.82395e-90	KDB12968.1	hypothetical protein UV8b_6170
UV8b_6176	143.942	1.45779	0.204432	4.17133	3.02833e-05	8.27876e-05	KDB12974.1	hypothetical protein UV8b_6176
UV8b_6184	704.419	1.54914	0.149658	6.05505	1.40378e-09	6.4699e-09	KDB12982.1	DNA replication ATPase
UV8b_6187	1973.02	1.64993	0.163621	5.89867	3.66433e-09	1.62109e-08	KDB12985.1	putative mitochondrial serine-tRNA ligase
UV8b_6191	253.395	2.47444	0.158804	9.11472	7.88716e-20	8.01049e-19	KDB12989.1	hypothetical protein UV8b_6191
UV8b_6199	2571.31	1.37083	0.125011	6.41451	1.41278e-10	7.11397e-10	KDB12997.1	hypothetical protein UV8b_6199
UV8b_6203	3523.01	1.62036	0.172882	5.48262	4.19071e-08	1.66338e-07	KDB13001.1	hypothetical protein UV8b_6203
UV8b_6209	1640.28	1.2885	0.104584	7.20688	5.72492e-13	3.6067e-12	KDB13007.1	hypothetical protein UV8b_6209
UV8b_6212	1520.08	1.5652	0.209203	4.37653	1.20584e-05	3.50824e-05	KDB13010.1	hypothetical protein UV8b_6212
UV8b_6215	56.877	1.16152	0.285221	2.38218	0.0172106	0.0294466	KDB13013.1	hypothetical protein UV8b_6215
UV8b_6216	221.32	1.97466	0.218569	5.28485	1.25809e-07	4.68304e-07	KDB13014.1	hypothetical protein UV8b_6216
UV8b_6220	2722.24	1.39358	0.130701	6.23707	4.4584e-10	2.16061e-09	KDB13018.1	transporter ATM1 precursor
UV8b_6221	936.772	3.16819	0.180296	10.2791	8.75786e-25	1.17978e-23	KDB13019.1	putative glycosyltransferase
UV8b_6222	383.095	3.3161	0.186644	10.393	2.66816e-25	3.70141e-24	KDB13020.1	hypothetical protein UV8b_6222
UV8b_6233	2568.85	1.29931	0.0993658	7.649	2.02554e-14	1.4073e-13	KDB12872.1	MFS general substrate transporter
UV8b_6238	1925.95	5.1427	0.176072	17.0856	1.90072e-65	1.16249e-63	KDB12877.1	DUF1264 domain protein
UV8b_6239	4994.9	3.61895	0.152233	13.906	5.82847e-44	1.73796e-42	KDB12878.1	cytochrome P450 phenylacetate 2-hydroxylase
UV8b_6240	1716.95	2.4317	0.199102	7.14435	9.04198e-13	5.6079e-12	KDB12879.1	putative GDP/GTP exchange factor Sec2p
UV8b_6243	4372.21	2.00037	0.0963293	12.1473	5.92687e-34	1.19955e-32	KDB12882.1	putative sorting nexin-3
UV8b_6244	753.049	6.37674	0.146178	25.5179	1.24835e-143	3.07644e-141	KDB12883.1	transport protein sec13
UV8b_6245	159.007	3.79477	0.18983	11.6936	1.37439e-31	2.49265e-30	KDB12884.1	putative vacuolar calcium ion transporter
UV8b_6246	180.248	2.43311	0.209599	6.79049	1.1175e-11	6.32673e-11	KDB12885.1	Vacuolar calcium ion transporter /H(+) exchanger
UV8b_6247	200.827	2.37511	0.207116	6.70807	1.97216e-11	1.09074e-10	KDB12886.1	vacuolar calcium ion
UV8b_6253	582.506	2.94073	0.128828	13.3528	1.14027e-40	3.05249e-39	KDB12892.1	sedoheptulose-1,7-bisphosphatase
UV8b_6257	6620.86	2.3173	0.100976	13.4243	4.3589e-41	1.18582e-39	KDB12896.1	hypothetical protein UV8b_6257
UV8b_6259	647.872	3.50595	0.141463	14.4975	1.257e-47	4.2299e-46	KDB12898.1	DNA primase large subunit
UV8b_6276	936.248	1.82194	0.198593	5.36658	8.02448e-08	3.07159e-07	KDB12915.1	putative endosomal SPRY domain protein
UV8b_6277	59.7355	1.58566	0.271287	3.41907	0.000628356	0.00140851	KDB12916.1	hypothetical protein UV8b_6277
UV8b_6279	728.726	2.08535	0.314061	3.88413	0.000102698	0.000259814	KDB12918.1	hypothetical protein UV8b_6279
UV8b_6280	2082.12	1.81824	0.299794	3.54777	0.000388505	0.000900493	KDB12919.1	C6 transcription factor
UV8b_6282	841.248	1.61266	0.13118	7.19121	6.42197e-13	4.02767e-12	KDB12921.1	hypothetical protein UV8b_6282
UV8b_6284	1947.35	2.17781	0.239288	5.32387	1.01585e-07	3.82724e-07	KDB12923.1	putative rRNA processing protein (Ebp2)
UV8b_6285	1301.89	4.78762	0.253984	11.0266	2.84464e-28	4.47191e-27	KDB12924.1	hypothetical protein UV8b_6285
UV8b_6286	9770.48	1.65217	0.193445	4.99604	5.85204e-07	2.01208e-06	KDB12925.1	nucleosome assembly protein
UV8b_6288	703.712	2.56979	0.314284	4.78303	1.7267e-06	5.59474e-06	KDB12927.1	DUF1671 domain-containing protein
UV8b_6289	1147.54	3.85111	0.200592	11.2305	2.88757e-29	4.70719e-28	KDB12928.1	inosine triphosphate pyrophosphatase
UV8b_6301	1190.15	1.83981	0.143712	7.48869	6.95641e-14	4.63337e-13	KDB12807.1	putative SNF2 family helicase/ATPase
UV8b_6302	7867.76	1.52566	0.276233	3.23081	0.00123438	0.00262311	KDB12808.1	nuclear transport factor 2
UV8b_6305	3297.65	3.36148	0.119799	16.4137	1.5262e-60	8.35817e-59	KDB12811.1	putative cell division control protein (Cdc15)
UV8b_6310	1816.59	1.34111	0.103698	7.56524	3.87153e-14	2.62456e-13	KDB12816.1	Cell division control protein
UV8b_6319	1886.87	1.1397	0.101879	6.54385	5.99555e-11	3.14176e-10	KDB12825.1	5\\'-methylthioadenosine phosphorylase (Meu1)
UV8b_6321	1963	2.13953	0.152371	8.21379	2.14321e-16	1.75029e-15	KDB12827.1	3,4-dihydroxy-2-butanone 4-phosphate synthase
UV8b_6326	512.024	1.15147	0.219015	3.07544	0.00210189	0.004305	KDB12832.1	hypothetical protein UV8b_6326
UV8b_6333	3328.78	1.37101	0.140451	5.71009	1.12917e-08	4.77604e-08	KDB12839.1	proteasome regulatory particle, non-ATPase-like protein
UV8b_6334	15666.5	2.13201	0.0838717	14.8697	5.18544e-50	1.98396e-48	KDB12840.1	putative alanine aminotransferase
UV8b_6351	1196.71	3.89183	0.21391	10.6426	1.88685e-26	2.78835e-25	KDB12857.1	3\\'-tRNA processing endoribonuclease
UV8b_6352	3691.97	6.66201	0.118983	32.7528	2.76764e-235	2.89876e-232	KDB12858.1	hypothetical protein UV8b_6352
UV8b_6357	4589.36	1.86692	0.0849546	12.8549	8.07755e-38	1.95048e-36	KDB12701.1	Sec14 cytosolic factor
UV8b_6358	1608.58	1.8041	0.16853	6.26197	3.80145e-10	1.85296e-09	KDB12702.1	YagE family protein
UV8b_6361	13168.9	2.53822	0.110788	13.4018	5.90369e-41	1.59058e-39	KDB12705.1	vacuolar protease A
UV8b_6365	1145.23	1.65321	0.144414	6.69651	2.13449e-11	1.17509e-10	KDB12709.1	ATP-dependent RNA helicase DHH1
UV8b_6373	7.3314	2.7588	0.722401	2.23393	0.0254876	0.0418993	KDB12717.1	hypothetical protein UV8b_6373
UV8b_6380	1264.88	1.01743	0.106215	5.60334	2.10257e-08	8.64873e-08	KDB12724.1	cytochrome c subunit VIb
UV8b_6385	14629.7	1.6264	0.167294	5.68692	1.29353e-08	5.42195e-08	KDB12729.1	ubiquitin-conjugating enzyme e2-16 kda
UV8b_6392	48.2645	2.14769	0.373013	3.36803	0.000757072	0.00167385	KDB12736.1	hypothetical protein UV8b_6392
UV8b_6393	371.778	1.36767	0.343453	2.32938	0.0198387	0.0334195	KDB12737.1	hypothetical protein UV8b_6393
UV8b_6394	2298.48	2.04487	0.0988032	12.1066	9.74363e-34	1.95315e-32	KDB12738.1	calcium dependent mitochondrial carrier protein
UV8b_6397	2593.13	1.31938	0.141838	5.44136	5.28765e-08	2.07227e-07	KDB12741.1	alpha/beta hydrolase fold protein
UV8b_6399	3358.01	1.0848	0.0894852	7.09132	1.32838e-12	8.13634e-12	KDB12743.1	hypothetical protein UV8b_6399
UV8b_6405	157.753	1.30543	0.226758	3.3676	0.000758247	0.00167502	KDB12749.1	putative aspartic-type endopeptidase
UV8b_6406	2428.94	1.61194	0.12272	7.68354	1.54748e-14	1.09236e-13	KDB12750.1	fructose-2,6-bisphosphatase
UV8b_6414	125.229	2.41761	0.195637	7.22876	4.87411e-13	3.08694e-12	KDB12758.1	putative acetylase
UV8b_6415	74.6277	1.45186	0.309393	2.74499	0.00605131	0.0114044	KDB12759.1	putative long-chain-fatty-acid-CoA ligase
UV8b_6420	1813.99	2.39815	0.110615	12.682	7.44044e-37	1.70337e-35	KDB12764.1	Peroxisomal membrane anchor family protein
UV8b_6423	1979.25	1.72709	0.237467	4.25441	2.09597e-05	5.87953e-05	KDB12767.1	ribosome biogenesis protein brx1
UV8b_6425	1416.67	2.83952	0.165646	10.0275	1.15431e-23	1.46544e-22	KDB12769.1	putative histone deacetylase A
UV8b_6433	1063.54	2.41187	0.136132	10.3639	3.61953e-25	4.94748e-24	KDB12777.1	Mus7/MMS22 conserved region protein
UV8b_6434	7313.21	3.04191	0.245596	7.24525	4.31646e-13	2.74621e-12	KDB12778.1	cytochrome c oxidase polypeptide V precursor
UV8b_6438	31760.6	3.57255	0.0997744	20.9454	2.06842e-97	2.54872e-95	KDB12782.1	ATP synthase beta chain precursor
UV8b_6442	4744.44	1.22071	0.102694	6.95339	3.56612e-12	2.09835e-11	KDB12786.1	putative oxoglutarate dehydrogenase precursor
UV8b_6443	837.412	1.12575	0.122111	5.39284	6.9352e-08	2.67665e-07	KDB12787.1	WD repeat protein
UV8b_6458	2142.43	1.10718	0.152455	4.24819	2.15509e-05	6.02721e-05	KDB12612.1	imidazoleglycerol-phosphate dehydratase
UV8b_6469	531.501	6.14349	0.152955	23.4952	4.56711e-122	8.31909e-120	KDB12623.1	subtilisin-like protease
UV8b_6470	147.744	1.95069	0.311642	3.6615	0.000250741	0.000597032	KDB12624.1	hypothetical protein UV8b_6470
UV8b_6471	603.085	6.32921	0.175516	21.0941	9.007e-99	1.12641e-96	KDB12625.1	hypothetical protein UV8b_6471
UV8b_6472	45.5081	5.01251	0.361995	8.09994	5.49882e-16	4.30202e-15	KDB12626.1	hypothetical protein UV8b_6472
UV8b_6473	205.97	4.16029	0.262712	9.26343	1.97975e-20	2.09979e-19	KDB12627.1	hypothetical protein UV8b_6473
UV8b_6482	5771.94	1.72294	0.100448	10.0335	1.08548e-23	1.38016e-22	KDB12636.1	isoleucyl-tRNA synthetase
UV8b_6483	913.196	1.5981	0.169364	5.51967	3.39646e-08	1.36428e-07	KDB12637.1	conidiophore development protein hymA
UV8b_6486	838.664	1.06118	0.101944	6.08916	1.13506e-09	5.28078e-09	KDB12640.1	hypothetical protein UV8b_6486
UV8b_6488	1646.25	1.07682	0.235206	2.67807	0.00740474	0.0137128	KDB12642.1	transmembrane protein 32
UV8b_6497	1643.05	1.22842	0.187782	3.82669	0.000129879	0.000324272	KDB12651.1	DUF786 domain-containing protein
UV8b_6499	52.0475	3.3394	0.296896	6.57948	4.72095e-11	2.49885e-10	KDB12653.1	glucose N-acetyltransferase
UV8b_6500	47.667	5.34151	0.377783	8.27084	1.33014e-16	1.10349e-15	KDB12654.1	aspartic-type endopeptidase
UV8b_6501	172.062	3.59279	0.241458	8.70399	3.20406e-18	2.92449e-17	KDB12655.1	chromo domain-containing protein
UV8b_6504	463.406	1.42691	0.165616	5.0399	4.6577e-07	1.62072e-06	KDB12658.1	putative HAD superfamily hydrolase
UV8b_6506	4551.95	1.00554	0.151858	3.87338	0.000107338	0.000270492	KDB12660.1	STF2-like protein
UV8b_6508	227.3	1.19575	0.151421	4.61936	3.84924e-06	1.19765e-05	KDB12662.1	BCAS2 family protein
UV8b_6509	6764.97	1.88438	0.0983608	11.2066	3.78499e-29	6.13431e-28	KDB12663.1	cAMP-dependent protein kinase regulatory subunit
UV8b_6514	517.895	1.58901	0.119065	7.80674	5.86877e-15	4.31355e-14	KDB12668.1	hypothetical protein UV8b_6514
UV8b_6516	440.075	1.78958	0.17871	5.85772	4.69263e-09	2.05646e-08	KDB12670.1	hypothetical protein UV8b_6516
UV8b_6523	1419.43	1.23255	0.210922	3.41831	0.000630118	0.00141208	KDB12677.1	putative rrm-type rna binding protein
UV8b_6528	2748.31	1.00676	0.113805	5.17479	2.28166e-07	8.24052e-07	KDB12682.1	heterogeneous nuclear ribonucleoprotein HRP1
UV8b_6535	106.667	1.41951	0.189716	4.37686	1.20403e-05	3.50419e-05	KDB12689.1	2OG-Fe oxygenase
UV8b_6536	8323.83	1.92929	0.21609	5.22265	1.7638e-07	6.46497e-07	KDB12690.1	60S ribosomal protein L5
UV8b_6539	703.214	1.0357	0.158617	3.81955	0.000133694	0.000333103	KDB12693.1	MIZ zinc finger protein
UV8b_6540	365.882	1.39412	0.155191	5.25484	1.48151e-07	5.48061e-07	KDB12694.1	hypothetical protein UV8b_6540
UV8b_6553	5313.25	1.82978	0.11487	9.31793	1.18632e-20	1.28096e-19	KDB12532.1	cytochrome c oxidase polypeptide iv
UV8b_6558	9236.93	1.13683	0.150041	4.43213	9.33052e-06	2.76354e-05	KDB12537.1	dihydroxy-acid dehydratase
UV8b_6569	1411.14	1.17865	0.136488	5.05145	4.38468e-07	1.52816e-06	KDB12548.1	NADP-dependent glycerol dehydrogenase
UV8b_6575	843.918	1.32475	0.127097	6.09717	1.07964e-09	5.03691e-09	KDB12554.1	BRCT domain-containing protein
UV8b_6580	155.808	12.0932	0.571957	12.3682	3.88427e-35	8.13658e-34	KDB12559.1	hypothetical protein UV8b_6580
UV8b_6581	105.445	9.36067	0.43778	12.5078	6.77074e-36	1.48513e-34	KDB12560.1	hypothetical protein UV8b_6581
UV8b_6582	702.355	1.24484	0.171297	4.25101	2.12807e-05	5.95958e-05	KDB12561.1	AAA family protein
UV8b_6583	1640.98	1.05266	0.101733	6.05277	1.42379e-09	6.55853e-09	KDB12562.1	hypothetical protein UV8b_6583
UV8b_6586	3433.47	1.34429	0.252908	3.10926	0.00187558	0.0038775	KDB12565.1	U6 snRNP-associated protein Lsm3
UV8b_6587	1601.78	1.15761	0.117674	5.75454	8.68784e-09	3.72927e-08	KDB12566.1	GTP-binding protein 1
UV8b_6595	2310.29	1.20034	0.111147	6.31737	2.66055e-10	1.31288e-09	KDB12574.1	putative GPI transamidase component PIG-S
UV8b_6600	1390.94	1.82204	0.138692	7.68481	1.53222e-14	1.08251e-13	KDB12579.1	putative Sulfite oxidase
UV8b_6612	2308.58	1.19286	0.112867	6.18233	6.31624e-10	3.01217e-09	KDB12591.1	putative Patatin family phospholipase
UV8b_6630	6161.98	2.08321	0.190521	6.39613	1.59366e-10	7.99117e-10	KDB12505.1	actin-like protein 2
UV8b_6634	2959.53	1.53623	0.151386	5.93604	2.91987e-09	1.30855e-08	KDB12509.1	mannose-6-phosphate isomerase
UV8b_6639	16985.2	1.13774	0.265477	2.50693	0.0121785	0.0215418	KDB12514.1	40S ribosomal protein S24
UV8b_6645	1725.56	2.07742	0.257529	4.71874	2.37305e-06	7.54604e-06	KDB12520.1	putative NADH-ubiquinone oxidoreductase B18 subunit
UV8b_6646	704.778	1.24667	0.123406	5.90938	3.43406e-09	1.52809e-08	KDB12521.1	secretory phospholipase a2
UV8b_6649	3421.24	3.05392	0.132723	13.4598	2.69548e-41	7.35681e-40	KDB12524.1	MFS transporter
UV8b_6650	201.452	4.34141	0.327765	7.74812	9.32645e-15	6.74256e-14	KDB12426.1	hypothetical protein UV8b_6650
UV8b_6651	1100.34	4.12559	0.245644	9.82445	8.83556e-23	1.0637e-21	KDB12427.1	hypothetical protein UV8b_6651
UV8b_6652	6.26211	2.87512	0.854332	1.9686	0.0489994	0.0757362	KDB12428.1	hypothetical protein UV8b_6652
UV8b_6655	19.5748	1.75253	0.45495	2.25335	0.024237	0.0401347	KDB12431.1	hypothetical protein UV8b_6655
UV8b_6660	4958.89	1.84379	0.13564	7.95154	1.84212e-15	1.3918e-14	KDB12436.1	disulfide isomerase
UV8b_6664	2885.48	1.61244	0.207032	4.55589	5.21634e-06	1.59809e-05	KDB12440.1	phosphoribosylglycinamide formyltransferase
UV8b_6666	12999.3	2.10133	0.183918	6.68339	2.33473e-11	1.27861e-10	KDB12442.1	L-xylulose reductase
UV8b_6668	82.306	2.27524	0.256525	5.18832	2.12201e-07	7.6971e-07	KDB12444.1	UbiD family decarboxylase
UV8b_6669	892.456	6.36412	0.317514	11.7248	9.51736e-32	1.74499e-30	KDB12445.1	hypothetical protein UV8b_6669
UV8b_6672	548.513	1.19834	0.112308	6.24166	4.32957e-10	2.10304e-09	KDB12448.1	alpha-ketoglutarate-dependent sulfonate dioxygenase
UV8b_6673	45019.9	4.33911	0.20439	12.4185	2.07456e-35	4.41186e-34	KDB12449.1	cell wall glycoprotein
UV8b_6674	2768.27	1.18139	0.124225	5.56304	2.65112e-08	1.07729e-07	KDB12450.1	RING-6 like protein
UV8b_6676	2728.35	1.76985	0.148451	6.97399	3.08078e-12	1.82173e-11	KDB12452.1	Protein cgi121
UV8b_6689	328.061	5.0436	0.2013	14.6563	1.22726e-48	4.4516e-47	KDB12465.1	2OG-Fe oxygenase
UV8b_6691	464.366	2.34546	0.141855	9.6719	3.96935e-22	4.64514e-21	KDB12467.1	hypothetical protein UV8b_6691
UV8b_6692	149.72	1.59999	0.202206	4.62862	3.68116e-06	1.14834e-05	KDB12468.1	hypothetical protein UV8b_6692
UV8b_6695	3158.68	2.46369	0.096411	14.9482	1.60071e-50	6.41738e-49	KDB12471.1	FAM96B-like protein
UV8b_6697	10581.8	2.20898	0.148734	8.68781	3.69495e-18	3.35791e-17	KDB12473.1	acetyl-CoA acetyltransferase
UV8b_6698	1820.82	1.7842	0.186825	5.58647	2.31733e-08	9.47167e-08	KDB12474.1	sn-1,2-diacylglycerol cholinephosphotransferase
UV8b_6699	72.33	2.55256	0.249442	5.98597	2.15104e-09	9.74248e-09	KDB12475.1	hypothetical protein UV8b_6699
UV8b_6712	784.397	1.49521	0.150561	5.80921	6.27672e-09	2.71796e-08	KDB12488.1	hypothetical protein UV8b_6712
UV8b_6713	2737.03	1.25642	0.133951	5.48674	4.0941e-08	1.62812e-07	KDB12489.1	hypothetical protein UV8b_6713
UV8b_6720	1325.34	1.05805	0.181447	3.411	0.000647244	0.00144852	KDB12496.1	mitochondrial hypoxia responsive domain-containing protein
UV8b_6729	776.28	2.31249	0.174688	7.74363	9.66144e-15	6.96672e-14	KDB12366.1	hypothetical protein UV8b_6729
UV8b_6732	2160.11	2.39795	0.122272	11.4721	1.82283e-30	3.14269e-29	KDB12369.1	subtilisin-like protein
UV8b_6733	604.492	1.0706	0.177266	3.5329	0.000411022	0.000948226	KDB12370.1	aspartic endopeptidase
UV8b_6738	631.075	1.04274	0.125833	4.84741	1.25081e-06	4.12945e-06	KDB12375.1	hypothetical protein UV8b_6738
UV8b_6764	5404.81	1.75365	0.285779	3.58957	0.000331228	0.000773295	KDB12401.1	hypothetical protein UV8b_6764
UV8b_6769	1128.76	1.43755	0.152879	5.50052	3.78682e-08	1.5131e-07	KDB12406.1	DUF218 domain-containing protein
UV8b_6773	2064.24	1.04474	0.0929899	6.57201	4.96389e-11	2.62413e-10	KDB12410.1	MSPdomain-containing protein
UV8b_6777	3775.77	1.24352	0.199415	3.64774	0.00026456	0.000627441	KDB12414.1	dimeric alpha-beta barrel
UV8b_6781	2511.86	2.4586	0.123656	11.6306	2.88168e-31	5.17036e-30	KDB12418.1	hypothetical protein UV8b_6781
UV8b_6793	3388.03	2.09779	0.174178	7.04529	1.85079e-12	1.11647e-11	KDB12306.1	ATP synthase subunit E
UV8b_6806	4028.62	2.34407	0.258747	5.29936	1.16212e-07	4.34901e-07	KDB12319.1	GPI anchored serine-threonine rich protein
UV8b_6808	916.241	1.03303	0.176399	3.42567	0.000613281	0.00137656	KDB12321.1	hypothetical protein UV8b_6808
UV8b_6820	7229.86	3.10026	0.0830196	21.8447	8.73436e-106	1.35528e-103	KDB12333.1	alpha-tubulin
UV8b_6830	5831.67	2.46496	0.282169	5.11009	3.22002e-07	1.13938e-06	KDB12343.1	nucleosome binding protein
UV8b_6831	563.066	1.94879	0.196357	5.80562	6.41285e-09	2.77405e-08	KDB12344.1	hypothetical protein UV8b_6831
UV8b_6840	4749.64	1.22363	0.107055	6.68609	2.2921e-11	1.25608e-10	KDB12353.1	NADH-ubiquinone oxidoreductase 49 kDa subunit
UV8b_6841	1822.79	1.32444	0.139872	5.53895	3.04288e-08	1.22696e-07	KDB12354.1	ubiquinone biosynthesis monooxygenase COQ6
UV8b_6843	9428.89	1.52733	0.179183	4.98611	6.16068e-07	2.10954e-06	KDB12356.1	ATP synthase subunit 4 precursor
UV8b_6854	3007.95	2.18081	0.288326	4.42448	9.66744e-06	2.85727e-05	KDB12255.1	metallothionein-I gene transcription activator
UV8b_6856	2956.51	1.38627	0.0924031	8.77588	1.69576e-18	1.57176e-17	KDB12257.1	budding site selection protein
UV8b_6859	3520.78	1.14312	0.131138	5.09908	3.41308e-07	1.20312e-06	KDB12260.1	putative ribosome biogenesis protein Ssf2
UV8b_6860	5597.03	1.18813	0.0944363	7.35957	1.84502e-13	1.19841e-12	KDB12261.1	DUF1338 domain protein
UV8b_6862	2919.77	1.02187	0.120532	4.95931	7.07442e-07	2.40571e-06	KDB12263.1	guanine deaminase
UV8b_6879	3483.43	3.83259	0.172881	12.968	1.85795e-38	4.59225e-37	KDB12280.1	hypothetical protein UV8b_6879
UV8b_6889	362.741	4.68501	0.1751	15.6514	3.25101e-55	1.59299e-53	KDB12290.1	hypothetical protein UV8b_6889
UV8b_6901	32.1689	4.03173	0.420657	5.6065	2.06458e-08	8.50081e-08	KDB12197.1	hypothetical protein UV8b_6901
UV8b_6908	2423.2	1.74611	0.14414	7.08622	1.37821e-12	8.42922e-12	KDB12204.1	DUF1716 domain-containing protein
UV8b_6914	11903.2	1.2475	0.201065	3.62938	0.0002841	0.000669612	KDB12210.1	apolipoprotein A1/A4 family protein
UV8b_6921	1319.52	1.30768	0.118817	6.43797	1.21082e-10	6.15622e-10	KDB12217.1	TOM core complex subunit
UV8b_6925	1459.71	1.33928	0.153027	5.11952	3.06311e-07	1.08569e-06	KDB12221.1	putative U5 snRNP complex subunit
UV8b_6933	1692.54	1.35512	0.113058	7.01144	2.35885e-12	1.41177e-11	KDB12229.1	putative Ran exchange factor Prp20/Pim1
UV8b_6935	576.617	3.39547	0.171554	11.5778	5.33923e-31	9.45822e-30	KDB12231.1	putative sugar O-acetyltransferase
UV8b_6937	1486.26	1.40152	0.233722	3.50774	0.000451923	0.00103574	KDB12233.1	hypothetical protein UV8b_6937
UV8b_6943	654.765	1.03975	0.141172	4.30833	1.64492e-05	4.696e-05	KDB12239.1	DNA replication licensing factor mcm2
UV8b_6951	136.217	2.49464	0.213926	6.82136	9.018e-12	5.14026e-11	KDB12247.1	hypothetical protein UV8b_6951
UV8b_6952	490.055	1.37887	0.156962	5.13871	2.76629e-07	9.87592e-07	KDB12248.1	hypothetical protein UV8b_6952
UV8b_6953	848.502	1.0326	0.114112	5.2933	1.20127e-07	4.48549e-07	KDB12249.1	hypothetical protein UV8b_6953
UV8b_6962	6117.41	2.55235	0.195845	7.62354	2.46819e-14	1.69934e-13	KDB12138.1	hypothetical protein UV8b_6962
UV8b_6973	879.805	1.16157	0.139745	4.86225	1.16059e-06	3.83914e-06	KDB12149.1	50S ribosomal protein L24
UV8b_6975	6155.59	1.4597	0.0799398	10.6814	1.24355e-26	1.85075e-25	KDB12151.1	putative aspartate aminotransferase
UV8b_6987	2723.71	1.68348	0.088383	11.1421	7.82423e-29	1.24875e-27	KDB12163.1	iron sulfur assembly protein 1
UV8b_7000	4019.85	2.23725	0.109226	11.9816	4.43648e-33	8.58506e-32	KDB12176.1	putative prohibitin PHB1
UV8b_7001	9808.77	2.47814	0.295318	4.90868	9.16937e-07	3.08184e-06	KDB12177.1	ubiquinol-cytochrome-C oxidoreductase complex III subunit VIII
UV8b_7002	1209.24	1.26066	0.154697	4.76698	1.87005e-06	6.02891e-06	KDB12178.1	DUF775 domain-containing protein
UV8b_7007	3015.4	2.57023	0.117069	12.8427	9.45189e-38	2.27579e-36	KDB12183.1	putative endoglucanase
UV8b_7008	3092.87	1.31239	0.125556	6.11444	9.68996e-10	4.53081e-09	KDB12184.1	NADH-ubiquinone oxidoreductase 24 kDa subunit precursor
UV8b_7015	1747.65	1.53355	0.097621	9.18931	3.95363e-20	4.09993e-19	KDB12191.1	putative 37S ribosomal protein S18
UV8b_7016	1991.85	1.01788	0.204657	2.90936	0.00362174	0.00710763	KDB12192.1	U3 small nucleolar ribonucleoprotein IMP3
UV8b_7020	287.47	2.66074	0.16431	9.47258	2.73004e-21	3.04189e-20	KDB12196.1	hypothetical protein UV8b_7020
UV8b_7022	85.7802	2.69125	0.308444	5.10394	3.32653e-07	1.17558e-06	KDB12119.1	hypothetical protein UV8b_7022
UV8b_7033	1754.61	1.21922	0.0970056	7.35215	1.9505e-13	1.26594e-12	KDB12130.1	2,3-dihydroxybenzoic acid decarboxylase dhbD
UV8b_7034	17.7147	9.79514	1.09202	5.24698	1.54612e-07	5.71206e-07	KDB12131.1	cell agglutination protein mam3
UV8b_7035	4.99152	5.57475	1.21517	2.68358	0.00728378	0.0135054	KDB12132.1	conidiospore surface protein
UV8b_7036	16.2373	1.92843	0.490774	2.29854	0.0215314	0.0359951	KDB12133.1	agglutinin-like protein
UV8b_7049	1817.45	1.15707	0.129385	5.23125	1.68372e-07	6.18767e-07	KDB12056.1	hypothetical protein UV8b_7049
UV8b_7054	8520.99	2.65909	0.114841	13.5446	8.53068e-42	2.35903e-40	KDB12061.1	serine/threonine-protein kinase RIO1
UV8b_7062	1819.19	1.47907	0.111111	7.78683	6.87094e-15	5.01059e-14	KDB12069.1	putative DUF580 domain protein Pns1
UV8b_7083	3201.21	3.62662	0.176471	12.0215	2.74085e-33	5.35329e-32	KDB12090.1	peptidase S8 and S53 subtilisin kexin sedolisin
UV8b_7084	10353.2	3.77295	0.109159	20.2186	6.72081e-91	7.12831e-89	KDB12091.1	peptidase S8 and S53 subtilisin kexin sedolisin
UV8b_7085	2955.99	1.68249	0.201217	4.89121	1.00219e-06	3.35091e-06	KDB12092.1	hypothetical protein UV8b_7085
UV8b_7086	5028.18	2.68009	0.114063	13.7447	5.48168e-43	1.58931e-41	KDB12093.1	hypothetical protein UV8b_7086
UV8b_7087	1790.37	3.70076	0.0995215	21.7522	6.58836e-105	9.68489e-103	KDB12094.1	hypothetical protein UV8b_7087
UV8b_7088	3968.31	3.14472	0.12383	14.8554	6.42e-50	2.44515e-48	KDB12095.1	NACHT domain protein
UV8b_7089	678.567	1.61599	0.220171	4.29344	1.75926e-05	4.99351e-05	KDB12096.1	F-box domain containing protein
UV8b_7091	5170.92	2.47883	0.157667	9.19677	3.68866e-20	3.83465e-19	KDB12098.1	glycosyl transferase family protein
UV8b_7107	796.642	1.29362	0.125971	6.00707	1.88909e-09	8.6119e-09	KDB12114.1	hypothetical protein UV8b_7107
UV8b_7111	1567.97	5.19966	0.167857	18.1202	2.2072e-73	1.5673e-71	KDB12025.1	hypothetical protein UV8b_7111
UV8b_7112	1627.72	1.12073	0.119065	5.50614	3.66795e-08	1.46911e-07	KDB12026.1	laccase-like protein
UV8b_7116	1190.6	1.35524	0.109657	7.22946	4.84914e-13	3.07345e-12	KDB12030.1	plasma membrane channel protein (Aqy1)
UV8b_7123	315.398	1.33482	0.23976	3.25668	0.00112725	0.00241443	KDB12037.1	V8-like Glu-specific endopeptidase
UV8b_7126	107.035	1.64804	0.226202	4.26187	2.02726e-05	5.69441e-05	KDB12040.1	putative cellulase
UV8b_7127	1212.55	1.11316	0.158525	4.10759	3.99813e-05	0.000107407	KDB12041.1	hypothetical protein UV8b_7127
UV8b_7134	1886.54	1.74157	0.103302	9.86189	6.08929e-23	7.40525e-22	KDB11991.1	secretion pathway protein Sls2/Rcy1
UV8b_7146	1964.17	1.05766	0.245114	2.5241	0.0115995	0.0206166	KDB12003.1	30S ribosomal protein S13
UV8b_7147	3405	1.47286	0.19604	4.39485	1.10851e-05	3.23857e-05	KDB12004.1	peptidyl-prolyl cis-trans isomerase B precursor
UV8b_7151	9506.26	1.59011	0.195167	4.76594	1.87976e-06	6.05555e-06	KDB12008.1	tropomyosin-1
UV8b_7152	853.253	2.49705	0.127813	11.4283	3.0197e-30	5.13226e-29	KDB12009.1	hypothetical protein UV8b_7152
UV8b_7167	2159.34	1.31282	0.155406	4.94156	7.74992e-07	2.6237e-06	KDB12024.1	putative protein kinase
UV8b_7171	1043.91	1.87013	0.124363	8.79648	1.41172e-18	1.31577e-17	KDB11942.1	heavy metal tolerance protein
UV8b_7180	4931.52	1.05422	0.156329	3.94475	7.98848e-05	0.000205955	KDB11951.1	acetolactate synthase precursor
UV8b_7182	435.69	1.10153	0.158906	4.05492	5.01513e-05	0.000133022	KDB11953.1	drug resistance protein
UV8b_7187	1702.81	2.12424	0.188636	6.58731	4.47862e-11	2.3787e-10	KDB11958.1	putative 1-aminocyclopropane-1-carboxylate deaminase
UV8b_7190	2332.65	1.01012	0.199347	2.96409	0.00303583	0.00603349	KDB11961.1	putative PUA RNA binding domain protein
UV8b_7195	946.204	1.15302	0.17577	3.83724	0.000124426	0.000311214	KDB11966.1	hypothetical protein UV8b_7195
UV8b_7198	274.614	2.22525	0.139704	9.31744	1.19179e-20	1.2852e-19	KDB11969.1	AAA family protein
UV8b_7199	177.622	2.76494	0.293258	5.51523	3.48325e-08	1.39714e-07	KDB11970.1	hypothetical protein UV8b_7199
UV8b_7201	5542.06	1.20767	0.105373	6.70421	2.02504e-11	1.11851e-10	KDB11972.1	MFS phospholipid transporter Git1
UV8b_7204	3325.57	1.85533	0.226942	4.78228	1.73317e-06	5.61137e-06	KDB11975.1	hypothetical protein UV8b_7204
UV8b_7217	3719.5	4.02133	0.138571	16.9756	1.24579e-64	7.45603e-63	KDB11892.1	CHY zinc finger domain-containing protein
UV8b_7219	3449.95	1.63276	0.184424	5.17885	2.23261e-07	8.07729e-07	KDB11894.1	DUF1752-domain-containing protein
UV8b_7222	6497.18	2.62872	0.139667	11.0098	3.42869e-28	5.3499e-27	KDB11897.1	Long-chain acyl-CoA synthetases & Acyl-protein synthetase
UV8b_7226	2234.55	1.84581	0.164268	6.57297	4.93214e-11	2.60899e-10	KDB11901.1	phosphoglycerate mutase family protein
UV8b_7234	143.152	1.57423	0.177576	5.18577	2.15122e-07	7.79294e-07	KDB11909.1	hypothetical protein UV8b_7234
UV8b_7241	2400.5	1.34145	0.151218	5.18918	2.11224e-07	7.66829e-07	KDB11916.1	hypothetical protein UV8b_7241
UV8b_7253	2274.37	1.43372	0.192508	4.35654	1.32132e-05	3.82052e-05	KDB11928.1	cation-transporting ATPase pma1
UV8b_7255	1127.41	1.84138	0.13257	8.12506	4.47143e-16	3.52457e-15	KDB11930.1	histidine kinase TCS1p
UV8b_7257	6175.45	1.42347	0.115671	7.19865	6.08133e-13	3.82549e-12	KDB11932.1	putative low affinity iron transporter
UV8b_7266	288.681	2.60201	0.149878	10.1555	3.13338e-24	4.12809e-23	KDB11843.1	secretory lipase family protein
UV8b_7267	526.612	1.14934	0.153665	4.37525	1.21295e-05	3.52771e-05	KDB11844.1	dicer-like protein 1
UV8b_7270	4813.53	2.00828	0.0927454	12.6666	9.05456e-37	2.06725e-35	KDB11847.1	hypothetical protein UV8b_7270
UV8b_7274	4383.28	1.08592	0.120501	5.2715	1.35312e-07	5.02561e-07	KDB11851.1	calcium-transporting ATPase 3
UV8b_7289	2982.64	1.11404	0.127223	5.12227	3.0188e-07	1.07089e-06	KDB11866.1	multisynthetase complex auxiliary component p43
UV8b_7295	2144.78	2.23126	0.174169	7.49387	6.68714e-14	4.46111e-13	KDB11872.1	hypothetical protein UV8b_7295
UV8b_7298	4048.04	2.0407	0.115163	10.3656	3.55507e-25	4.88327e-24	KDB11875.1	mannitol-1-phosphate 5-dehydrogenase
UV8b_7300	3775.98	1.04353	0.0876822	6.96177	3.36025e-12	1.98139e-11	KDB11877.1	glucose-6-phosphate isomerase
UV8b_7316	1809.35	1.8297	0.166123	6.44282	1.17271e-10	5.97699e-10	KDB11803.1	hypothetical protein UV8b_7316
UV8b_7331	24.0203	2.48691	0.489671	2.97087	0.00296959	0.00591588	KDB11818.1	NDT80 / PhoG like DNA-binding family protein
UV8b_7333	913.231	3.30589	0.125605	15.3961	1.73963e-53	7.92193e-52	KDB11820.1	tafazzin
UV8b_7334	1741	2.88821	0.177892	9.49731	2.15383e-21	2.41269e-20	KDB11821.1	ABC transporter
UV8b_7335	403.023	2.22865	0.183389	7.10879	1.17064e-12	7.19123e-12	KDB11822.1	putative ABC ATPase
UV8b_7342	2033.58	1.0224	0.123695	4.83497	1.33166e-06	4.37053e-06	KDB11829.1	glucan endo-1,3-beta-glucosidase
UV8b_7348	3115.12	1.23968	0.173533	4.17883	2.93014e-05	8.03392e-05	KDB11835.1	hypothetical protein UV8b_7348
UV8b_7353	1156.76	3.69084	0.213085	10.1321	3.97922e-24	5.20968e-23	KDB11765.1	hypothetical protein UV8b_7353
UV8b_7354	376.125	2.05307	0.161363	7.44268	9.86663e-14	6.51477e-13	KDB11766.1	hexose transporter-like protein
UV8b_7355	5927.3	3.22895	0.22417	8.42582	3.58225e-17	3.0944e-16	KDB11767.1	acyl-CoA thioesterase 2
UV8b_7357	561.202	2.47854	0.143978	10.0699	7.50358e-24	9.61353e-23	KDB11769.1	maltose permease
UV8b_7358	434.044	2.09872	0.181756	6.75449	1.43338e-11	8.03366e-11	KDB11770.1	agmatinase precursor
UV8b_7360	3.17292	8.76153	1.528	3.35418	0.000796016	0.00175107	KDB11772.1	multiple EGF-like-domains 6
UV8b_7364	77.354	1.77623	0.233545	4.44895	8.62891e-06	2.56753e-05	KDB11776.1	hypothetical protein UV8b_7364
UV8b_7367	78.3799	1.54836	0.218379	4.14752	3.36095e-05	9.14332e-05	KDB11779.1	hypothetical protein UV8b_7367
UV8b_7368	923.459	2.23496	0.169562	7.71026	1.25558e-14	8.91565e-14	KDB11780.1	glycoside hydrolase family 16 protein
UV8b_7372	3470.86	2.33161	0.149139	9.14517	5.9537e-20	6.09854e-19	KDB11784.1	cell wall protein
UV8b_7374	4171.26	2.61777	0.14251	10.7452	6.24515e-27	9.41153e-26	KDB11786.1	methylcitrate synthase precursor
UV8b_7375	1953.91	2.41074	0.12649	11.1486	7.27111e-29	1.16268e-27	KDB11787.1	isocitrate lyase
UV8b_7386	226.384	3.45695	0.167079	12.1032	1.01584e-33	2.02178e-32	KDB11798.1	hypothetical protein UV8b_7386
UV8b_7387	68.7986	4.32301	0.463799	5.45235	4.97078e-08	1.95449e-07	KDB11799.1	hypothetical protein UV8b_7387
UV8b_7388	4.43231	6.16855	1.29717	2.78173	0.005407	0.010278	KDB11800.1	hypothetical protein UV8b_7388
UV8b_7389	13905.7	2.10451	0.10481	11.7456	7.43542e-32	1.37531e-30	KDB11801.1	2-oxoglutarate-dependent ethylene succinate-forming enzyme
UV8b_7390	1938.92	4.60476	0.130791	20.5948	3.05455e-94	3.50604e-92	KDB11750.1	immunodominant surface protein gp36
UV8b_7391	7.59789	2.85569	0.742992	2.2483	0.024557	0.0405924	KDB11751.1	hypothetical protein UV8b_7391
UV8b_7406	4517.65	1.03572	0.144421	4.19509	2.7276e-05	7.51313e-05	KDB11697.1	VPS9 domain protein
UV8b_7410	5958.24	1.25032	0.19931	3.66961	0.000242916	0.000579885	KDB11701.1	D-lactate dehydrogenase 2 precursor
UV8b_7411	1955.68	1.16142	0.140222	4.84508	1.26559e-06	4.17166e-06	KDB11702.1	alpha-actinin, sarcomeric (f-actin cross linking protein)
UV8b_7412	1098.89	1.03341	0.247804	2.43944	0.0147099	0.0256513	KDB11703.1	putative ribosomal protein
UV8b_7413	804.172	1.1668	0.184416	3.70104	0.000214715	0.000517576	KDB11704.1	hypothetical protein UV8b_7413
UV8b_7415	6734.71	2.58056	0.120382	12.5395	4.53614e-36	1.00022e-34	KDB11706.1	enoyl-CoA hydratase precursor
UV8b_7420	4170.72	1.01883	0.158174	3.76786	0.00016465	0.000404576	KDB11711.1	midasin
UV8b_7421	1934.64	1.7539	0.123069	8.33651	7.65172e-17	6.43067e-16	KDB11712.1	54S ribosomal protein L12 precursor
UV8b_7423	2245.48	1.03583	0.196201	3.08827	0.00201324	0.0041386	KDB11714.1	pyrroline-5-carboxylate reductase
UV8b_7429	343.292	1.01479	0.25732	2.30692	0.0210594	0.0352773	KDB11720.1	mitochondrial import inner membrane translocase subunit TIM13
UV8b_7430	1186.34	1.06948	0.149329	4.18943	2.79659e-05	7.68534e-05	KDB11721.1	coiled-coil domain-containing protein 55
UV8b_7433	1106.35	1.53218	0.144605	6.19804	5.71704e-10	2.74484e-09	KDB11724.1	putative mRNA processing protein (Mss51)
UV8b_7445	4151.16	1.42741	0.114737	7.27737	3.40402e-13	2.18394e-12	KDB11736.1	G protein gamma subunit
UV8b_7446	322.807	1.36295	0.171136	4.65872	3.18178e-06	9.98133e-06	KDB11737.1	selenoprotein domain-containing protein
UV8b_7451	1989.28	1.98661	0.115292	10.0795	6.80693e-24	8.77465e-23	KDB11742.1	hypothetical protein UV8b_7451
UV8b_7452	5820.5	1.17169	0.106226	6.45222	1.10224e-10	5.63839e-10	KDB11743.1	pyruvate dehydrogenase protein x component
UV8b_7453	2134.87	2.08975	0.12135	10.0735	7.2322e-24	9.28003e-23	KDB11744.1	small oligopeptide transporter, OPT family
UV8b_7455	2221.11	1.07863	0.200471	3.14739	0.00164736	0.00344019	KDB11746.1	ubiquinol-cytochrome c chaperone
UV8b_7457	1465.03	1.26772	0.198875	3.72881	0.000192386	0.000467437	KDB11748.1	Dihydrofolate reductase
UV8b_7460	5215.63	3.53452	0.0859941	24.043	9.86928e-128	1.92313e-125	KDB11674.1	hypothetical protein UV8b_7460
UV8b_7461	2110.05	2.09077	0.160997	7.59657	3.04072e-14	2.08326e-13	KDB11675.1	putative transporter
UV8b_7466	636.106	1.94301	0.112569	10.0968	5.70797e-24	7.41505e-23	KDB11680.1	proteophosphoglycan 5
UV8b_7472	312.161	3.48674	0.228154	8.93963	3.90489e-19	3.78693e-18	KDB11686.1	hypothetical protein UV8b_7472
UV8b_7473	1065.18	2.14299	0.167922	7.46519	8.31771e-14	5.51814e-13	KDB11687.1	mitochondrial outer membrane protein MMM1
UV8b_7476	1353.68	3.17631	0.1007	18.4511	5.10639e-76	3.82022e-74	KDB11690.1	hypothetical protein UV8b_7476
UV8b_7478	701.835	1.73477	0.129263	7.8505	4.14398e-15	3.07278e-14	KDB11692.1	phospho-2-dehydro-3-deoxyheptonate aldolase
UV8b_7479	566.671	1.05135	0.144686	4.25056	2.13235e-05	5.96957e-05	KDB11693.1	hypothetical protein UV8b_7479
UV8b_7480	1589.29	6.04218	0.171771	20.5765	4.45628e-94	5.04583e-92	KDB11694.1	CBS domain containing protein
UV8b_7481	470.812	5.3033	0.254506	12.1892	3.54813e-34	7.25117e-33	KDB11695.1	cell wall glucanase
UV8b_7485	43.9563	3.02897	0.37172	4.76659	1.87372e-06	6.03843e-06	KDB11628.1	sam-dependent methyltransferase
UV8b_7487	40.1006	1.66218	0.425504	2.28509	0.0223077	0.0371899	KDB11630.1	fvmamide neuropeptide
UV8b_7488	169.085	7.29993	0.316455	13.4938	1.70085e-41	4.65732e-40	KDB11631.1	hypothetical protein UV8b_7488
UV8b_7489	177.432	9.54596	0.351655	15.8793	8.82229e-57	4.42647e-55	KDB11632.1	hypothetical protein UV8b_7489
UV8b_7490	40.8845	3.30736	0.340875	5.67563	1.38181e-08	5.7833e-08	KDB11633.1	Di-copper centre-containing protein
UV8b_7491	13.3422	5.09472	0.690331	4.31709	1.58102e-05	4.52436e-05	KDB11634.1	FAD dependent oxidoreductase
UV8b_7492	95.6234	4.10507	0.242747	9.89225	4.49825e-23	5.5086e-22	KDB11635.1	FAD dependent oxidoreductase
UV8b_7493	79.342	4.841	0.285638	9.91395	3.62026e-23	4.46748e-22	KDB11636.1	putative NRPS-like enzyme
UV8b_7494	312.5	1.59465	0.13526	6.89644	5.33217e-12	3.09621e-11	KDB11637.1	pyridoxamine phosphate oxidase family protein
UV8b_7495	723.293	2.02951	0.173914	6.82631	8.71272e-12	4.96963e-11	KDB11638.1	hypothetical protein UV8b_7495
UV8b_7496	2266.89	1.02556	0.284973	2.10517	0.0352761	0.0562792	KDB11639.1	phosphoglycerate mutase family protein
UV8b_7497	809.041	1.17018	0.106829	6.40755	1.47878e-10	7.43737e-10	KDB11640.1	mannosyltransferase
UV8b_7512	1679.89	1.023	0.216154	2.76847	0.00563208	0.010684	KDB11655.1	putative HDEL sequence binding protein
UV8b_7518	74.6537	1.01584	0.240008	2.47587	0.0132912	0.0233718	KDB11661.1	carbohydrate esterase family 8 protein
UV8b_7529	7974.53	1.5599	0.0905084	10.0817	6.65506e-24	8.60536e-23	KDB11672.1	DNA repair protein rad32
UV8b_7530	1331.6	1.87497	0.167647	6.54224	6.06047e-11	3.16993e-10	KDB11607.1	putative DNA mismatch repair protein PMS1
UV8b_7531	7715.24	1.78335	0.2595	4.02001	5.81952e-05	0.000152571	KDB11608.1	electron transfer flavoprotein alpha-subunit precursor
UV8b_7535	47282.8	1.24942	0.172801	4.22951	2.34196e-05	6.50209e-05	KDB11612.1	histone H3
UV8b_7540	1864.56	1.10024	0.14795	4.3501	1.36073e-05	3.92077e-05	KDB11617.1	putative neurofibromin
UV8b_7551	1545.72	1.08506	0.0938624	6.76221	1.35902e-11	7.64246e-11	KDB11584.1	chromatin assembly factor 1 subunit C
UV8b_7560	2959.91	1.2977	0.0978973	7.75412	8.89573e-15	6.43673e-14	KDB11593.1	ATP-dependent RNA helicase DBP4
UV8b_7562	4257.88	1.52143	0.0947264	9.39525	5.70812e-21	6.23577e-20	KDB11595.1	UDP-glucose 4-epimerase Gal10
UV8b_7565	1129.98	1.12421	0.124758	5.27117	1.35558e-07	5.03254e-07	KDB11598.1	hypothetical protein UV8b_7565
UV8b_7566	523.419	2.02558	0.149676	7.91633	2.44626e-15	1.83997e-14	KDB11599.1	hypothetical protein UV8b_7566
UV8b_7567	105.931	2.30989	0.252947	5.34183	9.20131e-08	3.4965e-07	KDB11600.1	hypothetical protein UV8b_7567
UV8b_7569	1116.94	2.63079	0.194164	7.92585	2.26595e-15	1.70588e-14	KDB11602.1	hypothetical protein UV8b_7569
UV8b_7570	1812.71	3.12264	0.174609	10.4613	1.3009e-25	1.8289e-24	KDB11603.1	actin lateral binding protein
UV8b_7572	525.078	4.48525	0.138027	19.0086	1.44818e-80	1.20141e-78	KDB11605.1	hypothetical protein UV8b_7572
UV8b_7573	1925.85	2.20699	0.0925756	13.9454	3.35526e-44	1.01129e-42	KDB11606.1	fungal Zn binuclear cluster domain containing protein
UV8b_7578	1809.52	1.94806	0.111504	10.2197	1.61857e-24	2.163e-23	KDB11536.1	nucleolar essential protein 1
UV8b_7580	788.436	2.52612	0.124305	11.8875	1.37429e-32	2.61708e-31	KDB11538.1	putative SprT family metallopeptidase
UV8b_7585	18245.4	2.4509	0.0924788	15.5029	3.31747e-54	1.54428e-52	KDB11543.1	putative mitochondrial aconitate hydratase
UV8b_7586	1335.66	1.03516	0.227546	2.66112	0.00778802	0.0143293	KDB11544.1	rhomboid protein 2
UV8b_7589	371.861	1.05696	0.215445	2.86981	0.00410723	0.0079737	KDB11547.1	hypothetical protein UV8b_7589
UV8b_7590	4002.92	1.38963	0.233796	3.47689	0.000507265	0.00115249	KDB11548.1	NADH-ubiquinone oxidoreductase 40 kDa subunit-like protein
UV8b_7591	322.004	1.18592	0.21489	3.22826	0.00124544	0.0026446	KDB11549.1	recombinational repair protein
UV8b_7594	2066.52	1.09695	0.196839	3.25991	0.00111449	0.00239199	KDB11552.1	putative metallo-beta-lactamase domain protein
UV8b_7596	1052.39	1.3502	0.130655	6.04503	1.49386e-09	6.86993e-09	KDB11554.1	chromatin structure-remodeling complex protein RSC1
UV8b_7597	1966.13	2.04428	0.112255	10.6528	1.69212e-26	2.50942e-25	KDB11555.1	RSC complex subunit RSC1
UV8b_7598	4338.98	1.05871	0.210188	2.94643	0.00321466	0.00636282	KDB11556.1	Xaa-Pro aminopeptidase
UV8b_7609	5367.93	1.37956	0.253213	3.18699	0.0014376	0.00302732	KDB11567.1	NADH:ubiquinone oxidoreductase 18.4kD subunit
UV8b_7613	958.759	1.3903	0.206945	3.92989	8.49839e-05	0.000218362	KDB11571.1	putative protein PET100 precursor
UV8b_7622	1328.5	1.8938	0.206496	5.36478	8.10498e-08	3.10099e-07	KDB11580.1	putative FYVE domain protein
UV8b_7623	35.2943	2.91271	0.36628	4.65171	3.29201e-06	1.03155e-05	KDB11478.1	flocculation protein FLO9
UV8b_7632	1427.92	1.0433	0.163507	3.73251	0.000189581	0.000461104	KDB11487.1	putative ubiquitination network signaling protein
UV8b_7635	474.422	1.72487	0.176054	5.73111	9.9777e-09	4.25029e-08	KDB11490.1	NADH-ubiquinone oxidoreductase complex 1 lyr family protein
UV8b_7641	9807.39	2.1803	0.121141	10.5282	6.4061e-26	9.17268e-25	KDB11496.1	succinyl-CoA ligase alpha-chain precursor
UV8b_7648	12850.2	2.42235	0.116934	12.1178	8.498e-34	1.70755e-32	KDB11503.1	beta-1,3-glucanosyltransferase
UV8b_7652	2607.4	1.03066	0.253026	2.38274	0.0171841	0.0294089	KDB11507.1	putative DNA helicase ino-80
UV8b_7656	909.005	1.49508	0.220762	3.96156	7.44609e-05	0.000192921	KDB11511.1	mediator complex protein
UV8b_7668	881.798	2.19828	0.112935	11.3863	4.89355e-30	8.2501e-29	KDB11523.1	chitinase 18-7
UV8b_7670	24247	1.23401	0.272353	2.65041	0.00803933	0.0147561	KDB11525.1	ubiquitin
UV8b_7674	39436.1	1.63303	0.149383	6.39468	1.60887e-10	8.05783e-10	KDB11529.1	hypothetical protein UV8b_7674
UV8b_7677	9.16896	3.19915	0.68466	2.7333	0.00627029	0.0117747	KDB11454.1	chitin synthase
UV8b_7678	13.557	3.06158	0.65643	2.72826	0.00636701	0.0119389	KDB11455.1	chitin deacetylase
UV8b_7682	1570.58	1.60031	0.106155	8.81842	1.16091e-18	1.09173e-17	KDB11459.1	cystathionine beta-synthase
UV8b_7696	1595.61	1.54843	0.191618	4.727	2.27866e-06	7.27073e-06	KDB11473.1	Xaa-Pro dipeptidase
UV8b_7700	1476.9	1.98712	0.115692	10.0473	9.44331e-24	1.20434e-22	KDB11477.1	subtilisin-like serine protease PR1C
UV8b_7709	52.457	2.03289	0.352725	3.37137	0.000747952	0.0016547	KDB11453.1	hypothetical protein UV8b_7709
UV8b_7711	1517.07	4.35351	0.143324	17.7684	1.24074e-70	8.5919e-69	KDB11444.1	glycosyl transferase
UV8b_7713	1238.38	1.89252	0.153816	7.19726	6.14337e-13	3.86161e-12	KDB11400.1	golgin subfamily a member 7 erf4
UV8b_7718	6031.49	3.71454	0.117108	18.5544	7.51188e-77	5.72201e-75	KDB11405.1	ssDNA binding protein
UV8b_7726	1293.2	1.623	0.195243	4.86263	1.15834e-06	3.83321e-06	KDB11413.1	GTP binding protein
UV8b_7742	10670.3	4.9308	0.190787	15.1181	1.23053e-51	5.2338e-50	KDB11429.1	hypothetical protein UV8b_7742
UV8b_7743	1663.61	1.07404	0.0974229	6.44896	1.12622e-10	5.74459e-10	KDB11430.1	ATP-dependent RNA helicase DBP8
UV8b_7747	1769.24	1.36184	0.0904166	8.81064	1.24439e-18	1.1663e-17	KDB11434.1	RER1 protein
UV8b_7750	515.464	1.24093	0.15429	4.70474	2.54184e-06	8.04915e-06	KDB11437.1	putative capsule-associated protein CAP1
UV8b_7752	9053.32	2.10502	0.219927	5.59892	2.15686e-08	8.85898e-08	KDB11439.1	40S ribosomal protein S12
UV8b_7753	618.059	2.57298	0.150643	9.99113	1.66668e-23	2.10953e-22	KDB11440.1	Peptidyl-prolyl cis-trans isomerase PIN4
UV8b_7759	19509.9	1.56884	0.120184	7.63594	2.24175e-14	1.54981e-13	KDB11366.1	hypothetical protein UV8b_7759
UV8b_7764	3188.62	1.23651	0.193524	3.73758	0.000185802	0.000452568	KDB11371.1	putative phosphate transporter (Pho88)
UV8b_7767	3168.3	1.87993	0.119044	9.23762	2.52038e-20	2.66309e-19	KDB11374.1	hypothetical protein UV8b_7767
UV8b_7777	4517.37	1.16907	0.173276	3.94667	7.92451e-05	0.000204495	KDB11384.1	T-complex protein 1 subunit epsilon
UV8b_7779	22221	2.26905	0.144803	9.16627	4.89663e-20	5.0404e-19	KDB11386.1	glucose-regulated protein
UV8b_7792	652.259	1.23039	0.126591	5.68552	1.30419e-08	5.4639e-08	KDB11330.1	cyclin-like F-box
UV8b_7798	2612.41	5.95572	0.115256	30.2272	1.04093e-200	7.92904e-198	KDB11336.1	hypothetical protein UV8b_7798
UV8b_7800	421.464	2.92989	0.182154	9.40894	5.01163e-21	5.52532e-20	KDB11338.1	steroid 5 alpha-reductase
UV8b_7801	343.47	3.43573	0.218974	9.17813	4.3866e-20	4.5321e-19	KDB11339.1	serine peptidase
UV8b_7802	110.89	1.15944	0.227803	2.97725	0.00290848	0.0058038	KDB11340.1	hypothetical protein UV8b_7802
UV8b_7815	2111.04	1.08985	0.117189	5.44012	5.32455e-08	2.08381e-07	KDB11353.1	hypothetical protein UV8b_7815
UV8b_7818	1247.85	1.43094	0.138296	6.0526	1.42523e-09	6.56154e-09	KDB11356.1	oxidoreductase, short-chain dehydrogenase/reductase family
UV8b_7821	1639.89	1.71057	0.196057	5.10372	3.33038e-07	1.17613e-06	KDB11359.1	hypothetical protein UV8b_7821
UV8b_7825	4195.57	3.04301	0.149248	11.9267	8.58877e-33	1.64304e-31	KDB11296.1	hypothetical protein UV8b_7825
UV8b_7844	3134.76	1.66002	0.0926396	10.482	1.0449e-25	1.47642e-24	KDB11315.1	putative lysyl-tRNA synthetase (lysine--tRNA ligase)
UV8b_7852	11087.5	2.8707	0.173811	9.66138	4.39894e-22	5.11217e-21	KDB11323.1	mitochondrial processing peptidase beta subunit
UV8b_7865	1115.21	1.89662	0.149987	7.39697	1.39323e-13	9.12738e-13	KDB11255.1	COM1 regulatory protein
UV8b_7866	2010.99	1.55341	0.156089	5.82162	5.82789e-09	2.52884e-08	KDB11256.1	hypothetical protein UV8b_7866
UV8b_7873	671.148	1.75583	0.147338	6.97098	3.14739e-12	1.8598e-11	KDB11263.1	hypothetical protein UV8b_7873
UV8b_7884	1855.01	2.1952	0.255308	5.02965	4.91387e-07	1.7049e-06	KDB11274.1	hypothetical protein UV8b_7884
UV8b_7887	823.819	1.46956	0.104896	8.19515	2.50287e-16	2.01844e-15	KDB11277.1	3\\' exoribonuclease family protein
UV8b_7890	864.436	1.31998	0.221576	3.48477	0.000492568	0.00112092	KDB11280.1	phosphoribosylaminoimidazole-succinocarboxamide synthase
UV8b_7893	6776.59	1.76819	0.198255	5.21715	1.81698e-07	6.64825e-07	KDB11283.1	putative mitochondrial F1F0 ATP synthase subunit Atp18
UV8b_7898	3263.55	1.00464	0.145337	4.04355	5.26479e-05	0.000138941	KDB11288.1	SCP-like extracellular protein
UV8b_7903	1049.88	1.16954	0.185504	3.68799	0.000226031	0.000542202	KDB11293.1	protein sco1
UV8b_7905	344.93	1.68836	0.186551	5.29415	1.1957e-07	4.46667e-07	KDB11295.1	HAD-superfamily subfamily cecr5
UV8b_7907	1916.6	3.15238	0.117863	15.6455	3.56418e-55	1.72626e-53	KDB11232.1	hypothetical protein UV8b_7907
UV8b_7911	1990.85	1.14092	0.09695	6.88391	5.82298e-12	3.3672e-11	KDB11236.1	hypothetical protein UV8b_7911
UV8b_7920	3886.56	1.95607	0.0813345	14.0681	5.96104e-45	1.83631e-43	KDB11245.1	C-type cyclin
UV8b_7922	4769.01	1.57081	0.0783754	11.7239	9.61767e-32	1.75953e-30	KDB11247.1	ER membrane protein
UV8b_7929	4162.72	1.44833	0.0849729	9.97047	2.05252e-23	2.57071e-22	KDB11196.1	SNARE docking complex subunit
UV8b_7931	2702.73	2.82898	0.164214	10.0774	6.95608e-24	8.95315e-23	KDB11198.1	isocitrate dehydrogenase
UV8b_7935	107.887	1.45989	0.261962	3.25995	0.00111432	0.00239199	KDB11202.1	hypothetical protein UV8b_7935
UV8b_7939	2899.1	5.22925	0.165906	18.4377	6.5516e-76	4.85804e-74	KDB11206.1	egg shell protein
UV8b_7943	1189.98	1.75413	0.105082	9.76471	1.59575e-22	1.90196e-21	KDB11210.1	60S ribosomal protein L20
UV8b_7951	3515.83	1.28975	0.131356	5.7436	9.2686e-09	3.96233e-08	KDB11218.1	replication factor-A protein 1
UV8b_7955	12244.2	1.75149	0.0798694	12.8279	1.14395e-37	2.71534e-36	KDB11222.1	putative acetohydroxy-acid isomeroreductase
UV8b_7956	2662.2	1.6231	0.119476	7.94678	1.91419e-15	1.44495e-14	KDB11223.1	hypothetical protein UV8b_7956
UV8b_7965	47.4044	1.16319	0.339513	2.00411	0.0450579	0.0701878	KDB11154.1	ADP-ribosylation factor family protein
UV8b_7968	6647.31	1.32719	0.185204	4.19191	2.76619e-05	7.60929e-05	KDB11157.1	triosephosphate isomerase
UV8b_7970	3390.1	1.97218	0.205655	5.60965	2.02734e-08	8.35976e-08	KDB11159.1	putative 60S acidic ribosomal protein P0
UV8b_7971	116.949	1.78051	0.254224	4.09691	4.18703e-05	0.000112122	KDB11160.1	hypothetical protein UV8b_7971
UV8b_7972	1769.44	1.45596	0.202977	4.19594	2.71739e-05	7.49228e-05	KDB11161.1	NTF2 and RRM domain-containing protein
UV8b_7981	2063.95	1.02954	0.132015	4.56192	5.06889e-06	1.55462e-05	KDB11170.1	pH-response transcription factor pacC/RIM101
UV8b_7985	2471.16	1.1043	0.245857	2.62743	0.00860324	0.0156914	KDB11174.1	4-nitrophenylphosphatase
UV8b_7986	372.882	1.67486	0.170441	5.74819	9.02035e-09	3.86211e-08	KDB11175.1	hypothetical protein UV8b_7986
UV8b_7995	907.649	1.25806	0.254935	2.88668	0.00389334	0.00759365	KDB11184.1	hypothetical protein UV8b_7995
UV8b_7999	1204.42	1.02994	0.206048	2.92397	0.00345599	0.00681199	KDB11188.1	rRNA-processing protein cgr1
UV8b_8001	4227.43	1.29358	0.121189	6.24396	4.26619e-10	2.07466e-09	KDB11190.1	PX domain protein
UV8b_8004	1385.11	1.60925	0.227809	4.13219	3.5933e-05	9.74377e-05	KDB11142.1	hypothetical protein UV8b_8004
UV8b_8005	2022.53	2.34246	0.234944	5.83225	5.46862e-09	2.37664e-08	KDB11143.1	50S ribosomal protein L27
UV8b_8009	2929.16	1.86427	0.185526	5.87803	4.15177e-09	1.83189e-08	KDB11147.1	RNAse iii domain-containing protein
UV8b_8019	3063.94	1.03839	0.0870749	6.97581	3.04113e-12	1.80082e-11	KDB11109.1	RNA polymerase i specific transcription initiation factor
UV8b_8022	1992.57	1.51002	0.12515	7.058	1.6892e-12	1.02416e-11	KDB11112.1	putative metaxin
UV8b_8025	1617.5	1.11063	0.101581	6.39566	1.59851e-10	8.01074e-10	KDB11115.1	putative isoleucine--tRNA ligase
UV8b_8028	2266.07	1.34524	0.0864145	9.10629	8.52452e-20	8.64733e-19	KDB11118.1	cap binding protein
UV8b_8036	1101.02	1.11288	0.110369	5.89833	3.67204e-09	1.62364e-08	KDB11126.1	UPF0220 domain protein
UV8b_8040	550.296	1.78172	0.140614	7.41209	1.24323e-13	8.18304e-13	KDB11130.1	hypothetical protein UV8b_8040
UV8b_8041	436.401	1.54075	0.166087	5.42655	5.74529e-08	2.2349e-07	KDB11131.1	protein rds1
UV8b_8043	97.2908	1.043	0.205596	2.96755	0.00300184	0.00597444	KDB11133.1	hypothetical protein UV8b_8043
UV8b_8044	1128.17	5.52968	0.142235	22.7416	1.73684e-114	2.97e-112	KDB11134.1	conidiation-specific protein 10
UV8b_8046	136.389	1.06048	0.193161	3.21153	0.00132029	0.00279009	KDB11136.1	short-chain dehydrogenase/reductase sdr
UV8b_8049	1804.75	1.30457	0.173552	4.39709	1.09714e-05	3.20982e-05	KDB11139.1	NAD dependent epimerase/dehydratase family protein
UV8b_8060	13843	1.26366	0.270324	2.73448	0.00624797	0.0117354	KDB11072.1	beta-lactamase family protein
UV8b_8075	143.531	1.77089	0.17725	5.84431	5.08678e-09	2.21875e-08	KDB11087.1	hypothetical protein UV8b_8075
UV8b_8090	624.776	1.05557	0.141809	4.35424	1.33531e-05	3.8568e-05	KDB11102.1	putative kinetochore protein fta4
UV8b_8091	719.402	2.24359	0.123476	10.6289	2.18708e-26	3.21501e-25	KDB11103.1	DRAP deaminase
UV8b_8097	598.844	1.38212	0.196078	4.12331	3.73463e-05	0.000100976	KDB11033.1	ankyrin repeat protein
UV8b_8098	2877.61	1.17938	0.0835546	8.25679	1.49646e-16	1.23414e-15	KDB11034.1	hypothetical protein UV8b_8098
UV8b_8099	302.698	1.61681	0.133746	7.0714	1.53382e-12	9.34681e-12	KDB11035.1	ATP-dependent DNA helicase mph1
UV8b_8103	808.336	1.01134	0.119313	4.95838	7.10848e-07	2.41631e-06	KDB11039.1	transcription factor pcc1
UV8b_8104	1993.13	2.07724	0.197518	6.15188	7.65706e-10	3.62273e-09	KDB11040.1	tyrosine-protein phosphatase CDC14
UV8b_8106	83.9158	1.28665	0.293384	2.56538	0.0103063	0.0184958	KDB11042.1	methyl-CpG-binding domain-containing protein 4
UV8b_8117	1006.3	3.32158	0.175908	11.0456	2.30338e-28	3.62782e-27	KDB11053.1	hypothetical protein UV8b_8117
UV8b_8118	23065.7	3.54922	0.18485	11.2316	2.85217e-29	4.66764e-28	KDB11054.1	UTP-glucose-1-phosphate uridylyltransferase
UV8b_8129	100.311	1.03584	0.295991	2.04711	0.0406474	0.0640859	KDB11001.1	hypothetical protein UV8b_8129
UV8b_8148	3107.87	1.13024	0.205687	3.21434	0.00130745	0.00276784	KDB11020.1	poly RNA polymerase cid11
UV8b_8156	1440	1.48852	0.222038	3.92153	8.79903e-05	0.000225396	KDB11028.1	beige/BEACH domain protein
UV8b_8159	1635.8	1.71408	0.093273	10.7499	5.93525e-27	8.96063e-26	KDB10984.1	vacuolar protein sorting-associated protein 35
UV8b_8160	485.089	3.13349	0.146945	12.4739	1.03632e-35	2.24375e-34	KDB10985.1	sphingosine kinase
UV8b_8162	15644.5	1.4167	0.195144	4.24668	2.16961e-05	6.05972e-05	KDB10987.1	fructose-bisphosphate aldolase, class II
UV8b_8165	2899.33	1.11184	0.21186	3.06989	0.00214135	0.00437822	KDB10990.1	37S ribosomal protein S11
UV8b_8166	2304.33	1.94298	0.184432	6.16256	7.15789e-10	3.3923e-09	KDB10991.1	putative mitochondrial inner membrane translocase subunit TIM44
UV8b_8171	333.322	4.81022	0.18865	14.9154	2.61636e-50	1.03408e-48	KDB10980.1	serine threonine protein kinase
UV8b_8172	378.704	7.21435	0.295474	14.2826	2.81102e-46	8.95573e-45	KDB10981.1	hypothetical protein UV8b_8172
UV8b_8173	42.1293	7.02915	0.510288	8.05777	7.76984e-16	5.9948e-15	KDB10982.1	hypothetical protein UV8b_8173
UV8b_8174	3026.8	3.77797	0.102487	21.5634	3.96e-103	5.35174e-101	KDB10983.1	Sterol desaturase family
UV8b_8178	2797.84	7.84762	0.162605	28.2314	2.40979e-175	1.18774e-172	KDB10979.1	hypothetical protein UV8b_8178
UV8b_8179	714.422	1.06667	0.143782	4.33966	1.42705e-05	4.1062e-05	KDB10946.1	hypothetical protein UV8b_8179
UV8b_8189	8269.98	1.58736	0.155398	5.97527	2.29713e-09	1.03649e-08	KDB10956.1	WD repeat containing protein pop1
UV8b_8193	2480.88	1.24694	0.198471	3.67516	0.000237705	0.000568578	KDB10960.1	beta-Ala-His dipeptidase
UV8b_8195	2479.47	1.41774	0.101037	8.20813	2.24654e-16	1.82755e-15	KDB10962.1	hypothetical protein UV8b_8195
UV8b_8196	1096.43	1.91166	0.119265	9.37617	6.84125e-21	7.43487e-20	KDB10963.1	U1 snRNP splicing complex subunit (Luc7)
UV8b_8197	2293.45	1.23028	0.165867	4.33883	1.43245e-05	4.12031e-05	KDB10964.1	GPI transamidase component GPI16
UV8b_8205	6279.27	2.16673	0.153851	8.23821	1.74809e-16	1.4346e-15	KDB10972.1	putative importin beta-4 subunit
UV8b_8206	41.5708	2.16436	0.399036	3.17282	0.00150966	0.00316948	KDB10973.1	hypothetical protein UV8b_8206
UV8b_8211	1.49515	6.90892	1.7844	2.26488	0.0235201	0.0390093	KDB10943.1	hypothetical protein UV8b_8211
UV8b_8214	3206.86	2.47816	0.139478	10.3932	2.66136e-25	3.69809e-24	KDB10920.1	peptide alpha-N-acetyltransferase
UV8b_8222	3182.92	1.54971	0.185422	4.88897	1.01365e-06	3.38652e-06	KDB10928.1	putative ribosomal protein YmL8
UV8b_8233	8459.34	1.20766	0.0884191	7.98965	1.35318e-15	1.03076e-14	KDB10939.1	putative casein kinase
UV8b_8235	7734.91	3.46892	0.153854	13.1891	1.01441e-39	2.63967e-38	KDB10941.1	putative voltage-gated K channel beta subunit
UV8b_8237	2346.83	1.45859	0.0951851	8.96381	3.13654e-19	3.05239e-18	KDB10915.1	survival factor 1
UV8b_8239	948.023	1.15163	0.147069	4.5806	4.63641e-06	1.42668e-05	KDB10917.1	hypothetical protein UV8b_8239
UV8b_8240	198.373	1.44754	0.241155	3.51126	0.000445987	0.00102297	KDB10902.1	hypothetical protein UV8b_8240
UV8b_8241	653.72	1.6314	0.236883	4.02862	5.61051e-05	0.000147553	KDB10903.1	hypothetical protein UV8b_8241
UV8b_8247	2028.26	2.699	0.173619	9.09352	9.58796e-20	9.65595e-19	KDB10909.1	hypothetical protein UV8b_8247
UV8b_8251	1188.8	1.10353	0.139845	4.61603	3.9116e-06	1.2148e-05	KDB10913.1	bladder cancer-related BC10-like protein
UV8b_8252	2593.53	1.71848	0.106335	9.45364	3.27262e-21	3.63677e-20	KDB10914.1	pathway-specific nitrogen regulator
UV8b_8255	1618.67	1.48661	0.0993485	8.75312	2.07531e-18	1.91298e-17	KDB10897.1	C2H2 type zinc finger containing protein
UV8b_8257	3145.61	1.00413	0.104575	5.61683	1.94495e-08	8.03189e-08	KDB10899.1	oxidoreductase
UV8b_8258	1432.04	1.78539	0.139488	7.48727	7.03192e-14	4.67994e-13	KDB10900.1	GTP binding protein (EngB)
UV8b_8259	913.406	1.11817	0.146802	4.4556	8.3658e-06	2.49544e-05	KDB10901.1	C3HC zinc finger domain-containing protein
UV8b_8260	1837.16	1.29837	0.0973649	7.80051	6.16579e-15	4.51996e-14	KDB10888.1	putative SUMO ligase SizA
UV8b_8261	13200.2	1.65962	0.0841379	11.5384	8.44934e-31	1.47187e-29	KDB10889.1	malate dehydrogenase precursor
UV8b_8274	1973.44	1.4835	0.255145	3.40117	0.000670974	0.00149484	KDB10870.1	hypothetical protein UV8b_8274
UV8b_8275	1692.25	1.03516	0.147586	4.10288	4.08046e-05	0.000109549	KDB10871.1	putative 3\\'->5\\' exoribonuclease
UV8b_8276	1986.9	2.80503	0.107436	15.2727	1.16257e-52	5.12692e-51	KDB10872.1	aldehyde dehydrogenase 3B1
UV8b_8277	1792.69	1.24579	0.122579	5.94511	2.76279e-09	1.24126e-08	KDB10873.1	putative 37S ribosomal protein Rsm24
UV8b_8279	1828.38	1.13802	0.125558	5.30195	1.14572e-07	4.28956e-07	KDB10875.1	putative WD40 domain-containing protein
UV8b_8292	1376.26	1.08807	0.136387	4.66671	3.06059e-06	9.62276e-06	KDB10848.1	GNAT family protein
UV8b_8293	2187.11	1.72036	0.155205	6.48397	8.93379e-11	4.60654e-10	KDB10849.1	MYND finger family protein
UV8b_8294	23286.9	4.60546	0.210186	12.8173	1.31165e-37	3.08717e-36	KDB10850.1	hypothetical protein UV8b_8294
UV8b_8295	2957.32	1.97419	0.139333	8.28827	1.1491e-16	9.57086e-16	KDB10851.1	sulfatase domain protein
UV8b_8298	3664.61	2.17556	0.16596	7.66826	1.74346e-14	1.22349e-13	KDB10854.1	hypothetical protein UV8b_8298
UV8b_8307	2809.44	1.38794	0.0914996	8.87318	7.10872e-19	6.76095e-18	KDB10836.1	dolichyl-diphosphooligosaccharide-protein glycotransferase
UV8b_8317	95.908	1.90555	0.209007	5.33321	9.64934e-08	3.6469e-07	KDB10846.1	aspartic endopeptidase pep1
UV8b_8321	695.123	1.6744	0.207786	4.71379	2.43152e-06	7.71897e-06	KDB10828.1	RING-14 protein
UV8b_8322	386.69	2.1335	0.184709	6.75665	1.41214e-11	7.9252e-11	KDB10829.1	hypothetical protein UV8b_8322
UV8b_8324	43406.3	2.36823	0.226662	6.11187	9.84674e-10	4.60155e-09	KDB10831.1	histone H2B
UV8b_8325	22092.4	1.47743	0.233162	3.70661	0.000210049	0.000507059	KDB10832.1	histone H2A
UV8b_8326	3993.9	1.85862	0.196466	5.5339	3.13185e-08	1.26102e-07	KDB10833.1	hypothetical protein UV8b_8326
UV8b_8327	5068.42	2.02902	0.183846	6.45597	1.07531e-10	5.50734e-10	KDB10834.1	dihydrolipoyllysine-residue succinyltransferase
UV8b_8328	5406.65	1.91946	0.215438	5.21177	1.87047e-07	6.82904e-07	KDB10835.1	hypothetical protein UV8b_8328
UV8b_8331	674.765	1.76598	0.207787	4.97159	6.64055e-07	2.26829e-06	KDB10820.1	hypothetical protein UV8b_8331
UV8b_8335	1103.41	1.34794	0.111873	7.04815	1.81315e-12	1.09534e-11	KDB10824.1	UV-endonuclease UVE-1
UV8b_8336	113.577	14.4051	1.04236	8.08401	6.26734e-16	4.87595e-15	KDB10818.1	hypothetical protein UV8b_8336
UV8b_8338	28.8966	4.91554	0.447496	6.42555	1.31397e-10	6.63236e-10	KDB10817.1	membrane fusion mating protein fig1
UV8b_8347	1.47626	6.88349	1.86784	2.15574	0.0311039	0.0501963	KDB10806.1	hypothetical protein UV8b_8347
UV8b_8352	2600.25	1.25274	0.0962028	7.61729	2.59054e-14	1.78211e-13	KDB10800.1	checkpoint kinase 2-like protein
UV8b_8354	957.926	1.34435	0.188375	4.17462	2.98481e-05	8.16777e-05	KDB10802.1	uridylate kinase
UV8b_8355	281.412	1.31063	0.236804	3.23756	0.00120555	0.00256638	KDB10803.1	hypothetical protein UV8b_8355
UV8b_8357	189.796	1.60233	0.247677	3.78438	0.000154093	0.00037986	KDB10805.1	4-hydroxyphenylpyruvate dioxygenase
UV8b_8359	59.5192	5.77897	0.371563	9.09799	9.20154e-20	9.28912e-19	KDB10794.1	nucleoporin Pom152
UV8b_8362	885.792	1.11481	0.233884	2.78823	0.00529965	0.0100945	KDB10783.1	DUF221 domain protein
UV8b_8365	921.041	1.19994	0.183906	3.81675	0.000135222	0.000336708	KDB10786.1	hypothetical protein UV8b_8365
UV8b_8371	20760.2	1.64605	0.200725	4.79699	1.61065e-06	5.23695e-06	KDB10792.1	Saccharopine dehydrogenase
UV8b_8372	525.333	3.86692	0.214458	10.5475	5.21452e-26	7.52021e-25	KDB10782.1	immunodominant surface protein gp36
UV8b_8373	1.85106	7.42804	1.67561	2.59315	0.00951005	0.0172105	KDB10781.1	hypothetical protein UV8b_8373
UV8b_8375	2.43774	8.11594	2.21066	2.14755	0.0317492	0.0511392	KDB10777.1	hypothetical protein UV8b_8375
UV8b_8382	5.13073	6.68471	1.2457	3.13904	0.00169501	0.00352856	KDB10772.1	hypothetical protein UV8b_8382
UV8b_8389	77.8065	2.86494	0.577815	2.90038	0.00372715	0.00728986	KDB10763.1	DNA-directed RNA polymerase large
UV8b_8392	4.19068	6.16155	1.33899	2.69178	0.00710722	0.0132043	KDB10761.1	hypothetical protein UV8b_8392
UV8b_8404	410.488	1.96674	0.173696	6.62345	3.50905e-11	1.87635e-10	KDB10749.1	HIT domain-containing protein
UV8b_8410	2365.67	1.94282	0.100557	11.3019	1.28474e-29	2.12325e-28	KDB10743.1	succinate dehydrogenase flavoprotein subunit precursor
UV8b_8411	9064.48	1.84627	0.0999492	10.8055	3.24209e-27	4.97536e-26	KDB10744.1	hypothetical protein UV8b_8411
UV8b_8421	112.599	5.41433	0.270564	11.7058	1.18988e-31	2.16739e-30	KDB10733.1	reverse transcriptase family protein

## Sheet: Table S4
Table S4 Down-regulated genes in the ∆Uvkmt2 mutant
Gene ID	baseMean	log2FoldChange	lfcSE	stat	pvalue	padj	Protein product	Protein Name
UV8b_1	17.9086	-2.82029	0.614211	-2.68599	0.00723147	0.0134173	KDB18610.1	hypothetical protein UV8b_1
UV8b_2	929.084	-4.88476	0.170855	-16.7241	8.74902e-63	5.0211e-61	KDB18611.1	WSC domain containing protein
UV8b_14	2019.36	-1.387	0.111784	-7.25813	3.92481e-13	2.50656e-12	KDB18623.1	NAD(P) transhydrogenase precursor
UV8b_18	382.076	-1.11711	0.187819	-3.47922	0.00050287	0.00114312	KDB18627.1	putative septum initiation protein sid3
UV8b_19	5195.57	-2.23852	0.243219	-5.38383	7.29159e-08	2.80644e-07	KDB18628.1	hypothetical protein UV8b_19
UV8b_20	2115.85	-4.50761	0.142052	-18.5621	6.5166e-77	5.00941e-75	KDB18629.1	hypothetical protein UV8b_20
UV8b_21	1829.93	-1.82022	0.141451	-7.52741	5.17551e-14	3.46925e-13	KDB18630.1	hypothetical protein UV8b_21
UV8b_23	468.911	-2.86433	0.180179	-9.29925	1.41433e-20	1.51932e-19	KDB18632.1	lipid phosphate phosphatase 2
UV8b_26	426.433	-1.45202	0.155456	-5.46378	4.6611e-08	1.83876e-07	KDB18635.1	bZIP transcription factor
UV8b_37	48.9236	-1.14661	0.297836	-2.252	0.0243225	0.0402385	KDB18646.1	hypothetical protein UV8b_37
UV8b_40	756.174	-4.26281	0.134694	-18.513	1.62245e-76	1.22473e-74	KDB18649.1	allantoate permease
UV8b_41	783.052	-2.90623	0.187991	-9.04317	1.52188e-19	1.5091e-18	KDB18650.1	neutral alpha-glucosidase ab precursor
UV8b_43	267.389	-1.22422	0.198697	-3.60408	0.000313258	0.000734	KDB18652.1	low temperature requirement A protein(LtrA)
UV8b_44	3000.75	-4.82457	0.148224	-19.0401	7.94265e-81	6.65514e-79	KDB18653.1	subtilisin-like protease pr1a
UV8b_45	583.379	-2.09765	0.120343	-10.1962	2.0615e-24	2.73311e-23	KDB18654.1	C6 transcription factor
UV8b_46	3192.92	-1.0535	0.182709	-3.3729	0.000743817	0.00164618	KDB18655.1	haloalkanoic acid dehalogenase
UV8b_47	698.361	-1.17864	0.212465	-3.24507	0.00117421	0.00250541	KDB18656.1	DNA-directed RNA polymerase III
UV8b_50	629.42	-1.022	0.165379	-3.61493	0.000300425	0.000706303	KDB18659.1	FAD binding domain containing protein
UV8b_51	148.247	-1.58546	0.196412	-4.72188	2.33675e-06	7.44188e-06	KDB18660.1	hypothetical protein UV8b_51
UV8b_53	4802.06	-4.48781	0.135627	-19.356	1.81447e-83	1.58369e-81	KDB18662.1	oligopeptide transporter OPT-like protein
UV8b_54	4382.39	-2.13513	0.191641	-6.51724	7.1614e-11	3.7155e-10	KDB18663.1	acetamidase
UV8b_55	573.802	-1.57379	0.13893	-6.62643	3.4391e-11	1.84129e-10	KDB18664.1	C6 transcription factor
UV8b_56	355.915	-2.75901	0.20215	-7.98377	1.41932e-15	1.0782e-14	KDB18665.1	pantothenate transporter
UV8b_57	1791.84	-6.43269	0.14793	-25.437	9.83604e-143	2.35475e-140	KDB18666.1	integral membrane protein
UV8b_68	276.759	-1.23136	0.249952	-2.88175	0.00395471	0.007699	KDB18677.1	RNAse H domain containing protein
UV8b_69	57.0112	-1.51484	0.265526	-3.33725	0.00084613	0.00185498	KDB18678.1	hypothetical protein UV8b_69
UV8b_70	8015.79	-3.20897	0.186302	-10.0757	7.07205e-24	9.08845e-23	KDB18679.1	oligopeptide transporter
UV8b_71	1166.87	-2.95232	0.124254	-13.8989	6.4323e-44	1.91122e-42	KDB18680.1	thiolase
UV8b_72	436.087	-1.2776	0.175487	-4.2587	2.05621e-05	5.77187e-05	KDB18681.1	putative carnitinyl-CoA dehydratase
UV8b_73	3564.03	-7.31018	0.172147	-24.8403	3.28914e-136	7.25255e-134	KDB18682.1	Dimethylglycine Oxidase
UV8b_74	2717	-3.05702	0.120116	-14.8876	3.96704e-50	1.53179e-48	KDB18683.1	C6 transcription factor
UV8b_75	3165.19	-9.33472	0.226665	-24.0905	3.1463e-128	6.27687e-126	KDB18684.1	Rieske
UV8b_76	6801.37	-12.2309	0.242011	-29.5631	4.45112e-192	2.86892e-189	KDB18685.1	Rieske
UV8b_77	6565.97	-5.20189	0.156478	-19.4462	3.13841e-84	2.85834e-82	KDB18686.1	sarcosine oxidase
UV8b_81	82.392	-1.70401	0.270017	-3.69155	0.000222895	0.000535753	KDB18690.1	hypothetical protein UV8b_81
UV8b_86	571.962	-2.41929	0.141682	-9.98856	1.7105e-23	2.15523e-22	KDB18695.1	mei5 protein
UV8b_87	564.266	-1.45552	0.146679	-5.80468	6.4488e-09	2.78816e-08	KDB18696.1	activating transcription factor 7a
UV8b_102	65.666	-3.08164	0.280962	-6.41596	1.39935e-10	7.05061e-10	KDB18711.1	protein-tyrosine phosphatase
UV8b_105	774.792	-3.32651	0.161792	-12.0271	2.56062e-33	5.01295e-32	KDB18714.1	superoxide dismutase
UV8b_109	38.6506	-1.7707	0.324937	-3.18767	0.00143424	0.00302098	KDB18718.1	bZIP transcription factor
UV8b_112	315.462	-6.04554	0.29933	-11.8144	3.28765e-32	6.1627e-31	KDB18721.1	n-terminal fungal transcription regulatory domain-containing protein
UV8b_117	1121.47	-7.64723	0.175124	-25.5439	6.42059e-144	1.63025e-141	KDB18726.1	hypothetical protein UV8b_117
UV8b_119	228.629	-1.44347	0.231315	-3.65034	0.000261891	0.000621639	KDB18728.1	fungal transcriptional regulatory protein
UV8b_122	461.238	-1.69377	0.126245	-7.84814	4.2225e-15	3.12824e-14	KDB18731.1	hisactophilin c49s mutant phototropin phy3 fusion protein
UV8b_127	1071.76	-2.22193	0.168442	-7.71625	1.19799e-14	8.52843e-14	KDB18736.1	2-nitropropane dioxygenase
UV8b_130	287.55	-1.34208	0.263298	-2.98167	0.00286678	0.00572897	KDB18739.1	acid phosphatase
UV8b_132	76.7536	-1.23118	0.270248	-2.66493	0.00770033	0.0141929	KDB18741.1	hypothetical protein UV8b_132
UV8b_134	1216.22	-2.09713	0.161943	-7.57512	3.58799e-14	2.44024e-13	KDB18743.1	GTP cyclohydrolase 1
UV8b_135	877.476	-2.25136	0.19459	-6.76788	1.30683e-11	7.36375e-11	KDB18744.1	PHD transcription factor
UV8b_144	4654.96	-1.05423	0.122481	-5.03493	4.78018e-07	1.66058e-06	KDB18753.1	carboxylic acid transport protein
UV8b_146	115.501	-1.7366	0.241567	-4.20522	2.60823e-05	7.20552e-05	KDB18755.1	oligopeptide transporter protein
UV8b_147	15.8226	-3.7229	0.592991	-3.6725	0.000240193	0.000574039	KDB18756.1	hypothetical protein UV8b_147
UV8b_148	39.892	-2.77097	0.417165	-3.88555	0.000102099	0.000258533	KDB18757.1	hypothetical protein UV8b_148
UV8b_154	497.482	-1.10004	0.124005	-5.18919	2.11216e-07	7.66829e-07	KDB18763.1	epoxide hydrolase
UV8b_162	219.149	-1.79043	0.166749	-6.2809	3.36621e-10	1.64848e-09	KDB18771.1	cytochrome P450 monooxygenase
UV8b_164	1956.4	-2.70366	0.131004	-12.0724	1.47725e-33	2.91244e-32	KDB18773.1	Homocitrate synthase
UV8b_172	1646.31	-1.39136	0.0985666	-8.25731	1.48995e-16	1.22998e-15	KDB18781.1	hypothetical protein UV8b_172
UV8b_173	538.912	-3.27655	0.130585	-14.6775	8.9858e-49	3.30228e-47	KDB18782.1	hypothetical protein UV8b_173
UV8b_179	884.515	-1.20904	0.216485	-3.26695	0.00108715	0.00233809	KDB18788.1	GATA transcription factor
UV8b_180	5601.33	-2.15122	0.128033	-9.82859	8.4798e-23	1.02233e-21	KDB18789.1	putative POL12 (DNA-directed DNA polymerase alpha)
UV8b_182	55.5859	-2.73809	0.290417	-5.51509	3.48607e-08	1.3976e-07	KDB18791.1	hypothetical protein UV8b_182
UV8b_184	268.672	-2.59757	0.157266	-9.66186	4.37855e-22	5.09554e-21	KDB18793.1	hypothetical protein UV8b_184
UV8b_198	23.3345	-4.42294	0.493501	-5.24266	1.58281e-07	5.84244e-07	KDB18807.1	hypothetical protein UV8b_198
UV8b_200	61.5698	-1.49974	0.315016	-2.7849	0.00535441	0.0101872	KDB18809.1	hypothetical protein UV8b_200
UV8b_202	1637.11	-1.40151	0.212216	-3.8632	0.000111912	0.000281341	KDB18811.1	COPII coat assembly protein SEC16
UV8b_222	647.263	-1.21647	0.20409	-3.48666	0.000489091	0.00111452	KDB18831.1	urease accessory protein
UV8b_232	230.102	-1.2862	0.205753	-3.6567	0.000255486	0.000607821	KDB18841.1	hypothetical protein UV8b_232
UV8b_233	90.3511	-1.31872	0.300045	-2.57096	0.0101416	0.0182157	KDB18842.1	hypothetical protein UV8b_233
UV8b_234	1462.23	-2.81161	0.0969838	-16.9584	1.66833e-64	9.91415e-63	KDB18843.1	L-threo-3-deoxy-hexulosonate aldolase
UV8b_236	1257.71	-1.43494	0.128502	-6.53206	6.48705e-11	3.37819e-10	KDB18845.1	putative MFS multidrug transporter
UV8b_244	17.4555	-2.26977	0.532767	-2.49214	0.0126975	0.0223983	KDB18853.1	hypothetical protein UV8b_244
UV8b_246	107.348	-1.50389	0.346341	-2.54003	0.0110844	0.0197988	KDB18855.1	fungal transcriptional regulatory protein
UV8b_257	340.461	-1.14755	0.157105	-4.27277	1.93063e-05	5.45774e-05	KDB18866.1	hypothetical protein UV8b_257
UV8b_264	748.737	-2.30508	0.165832	-8.131	4.25779e-16	3.35933e-15	KDB18873.1	putative signal transduction protein Syg1
UV8b_268	20.0241	-3.07117	0.471475	-3.81042	0.000138729	0.000344213	KDB18877.1	hypothetical protein UV8b_268
UV8b_269	35.0781	-2.07006	0.34942	-3.46548	0.000529281	0.00119926	KDB18878.1	hypothetical protein UV8b_269
UV8b_277	3338.28	-3.44005	0.114821	-17.5255	9.15564e-69	5.94691e-67	KDB18886.1	ATP synthase f0
UV8b_290	1138.38	-1.37722	0.137497	-5.8592	4.65103e-09	2.0393e-08	KDB18899.1	GPI-anchor transamidase-like protein
UV8b_297	4996.64	-1.58352	0.178263	-5.19624	2.03355e-07	7.38902e-07	KDB18906.1	pyridoxamine 5\\'-phosphate oxidase
UV8b_299	624.125	-1.12051	0.192706	-3.40135	0.00067055	0.00149429	KDB18908.1	glutamine repeat protein-1
UV8b_304	1592.99	-1.33194	0.159876	-4.87339	1.097e-06	3.64753e-06	KDB18913.1	sur7 protein
UV8b_306	1211.84	-1.33716	0.201403	-3.88369	0.000102885	0.00026021	KDB18915.1	activating signal cointegrator 1 complex subunit 3
UV8b_308	717.998	-1.18996	0.142567	-4.88249	1.04754e-06	3.4886e-06	KDB18917.1	hypothetical protein UV8b_308
UV8b_314	1383.58	-1.14573	0.173459	-3.8638	0.000111636	0.000280817	KDB18923.1	bZIP transcription factor
UV8b_318	186.994	-2.18723	0.223066	-5.73572	9.70984e-09	4.1425e-08	KDB18927.1	hypothetical protein UV8b_318
UV8b_325	610.278	-2.10355	0.242037	-5.08392	3.69719e-07	1.29618e-06	KDB18934.1	family C-like G-protein-coupled receptor
UV8b_327	1497.35	-1.08878	0.155464	-4.09673	4.19034e-05	0.000112175	KDB18936.1	putative mRNA decapping hydrolase
UV8b_329	853.029	-1.01067	0.116451	-5.07683	3.83794e-07	1.3444e-06	KDB18938.1	hexokinase XprF
UV8b_330	77.2137	-3.71458	0.358129	-6.06735	1.30041e-09	6.00998e-09	KDB18939.1	hypothetical protein UV8b_330
UV8b_333	1818.32	-1.21626	0.121974	-5.83297	5.44496e-09	2.36758e-08	KDB18942.1	putative tetracycline-efflux transporter
UV8b_337	3070.35	-3.21758	0.165923	-11.3436	7.98306e-30	1.34048e-28	KDB18946.1	uracil permease
UV8b_363	2612.87	-1.50816	0.170849	-5.16371	2.42102e-07	8.71005e-07	KDB18972.1	integral membrane protein
UV8b_367	1823.54	-1.2787	0.104111	-7.18454	6.74323e-13	4.226e-12	KDB18976.1	cell division GTP binding protein
UV8b_370	466.613	-1.2316	0.143411	-5.02358	5.07171e-07	1.75675e-06	KDB18979.1	zinc finger containing protein
UV8b_371	977.952	-1.55151	0.0979043	-9.27005	1.8605e-20	1.98083e-19	KDB18980.1	esterase
UV8b_372	1877.5	-2.50487	0.104291	-14.0497	7.73891e-45	2.37525e-43	KDB18981.1	glycine-rich cell wall structural protein 1
UV8b_373	3098.44	-1.45234	0.172313	-4.93037	8.20757e-07	2.77415e-06	KDB18982.1	putative cell division control protein Cdc25
UV8b_375	156.087	-3.08237	0.234978	-7.67336	1.67554e-14	1.17879e-13	KDB18984.1	CBM6-containing protein
UV8b_376	77.9602	-3.43245	0.246844	-8.13411	4.14976e-16	3.28026e-15	KDB18985.1	glycoside hydrolase family 16 protein
UV8b_385	1091	-3.72879	0.23687	-9.20845	3.30883e-20	3.46126e-19	KDB18994.1	PH domain protein
UV8b_391	607.601	-1.38721	0.10742	-7.55411	4.21733e-14	2.84746e-13	KDB19000.1	thiouridylase subunit 2
UV8b_398	293.551	-1.76217	0.193452	-5.32847	9.90441e-08	3.73656e-07	KDB19007.1	hypothetical protein UV8b_398
UV8b_405	2124.97	-1.7119	0.159552	-6.2763	3.46732e-10	1.69502e-09	KDB19014.1	putative GTP-binding protein Sey1
UV8b_406	1250.31	-1.06575	0.163087	-3.82265	0.000132026	0.00032924	KDB19015.1	putative GTP-binding protein Sey1
UV8b_412	610.355	-1.52385	0.181937	-4.89947	9.60942e-07	3.21845e-06	KDB19021.1	protein phosphatase
UV8b_441	105.949	-1.25674	0.212761	-3.45526	0.000549761	0.00124263	KDB19050.1	exonuclease
UV8b_443	203.684	-3.04625	0.197646	-9.01581	1.95414e-19	1.92406e-18	KDB19052.1	hypothetical protein UV8b_443
UV8b_444	646.905	-3.11831	0.142098	-12.8368	1.01963e-37	2.448e-36	KDB19053.1	lipase 3 precursor
UV8b_450	3495.85	-1.08741	0.194441	-3.27142	0.00107009	0.00230615	KDB19059.1	calcium permease
UV8b_452	438.856	-2.04238	0.254804	-4.68877	2.74858e-06	8.66454e-06	KDB19061.1	hypothetical protein UV8b_452
UV8b_456	837.469	-1.04328	0.154851	-3.94107	8.11174e-05	0.00020894	KDB19065.1	glutamate decarboxylase
UV8b_457	119.337	-1.21616	0.243781	-2.91823	0.00352023	0.00692231	KDB19066.1	glutamate decarboxylase
UV8b_458	1752.37	-3.13666	0.117342	-15.6365	4.10423e-55	1.96511e-53	KDB19067.1	hormone-sensitive lipase
UV8b_463	271.422	-1.69023	0.148591	-6.654	2.85237e-11	1.54693e-10	KDB19072.1	spo22-domain-containing protein
UV8b_464	77.2689	-1.54019	0.301259	-2.99064	0.00278396	0.00557658	KDB19073.1	ZIP4 protein
UV8b_465	58.0231	-2.22564	0.344442	-3.77978	0.000156967	0.000386377	KDB19074.1	hypothetical protein UV8b_465
UV8b_473	1063.15	-1.52142	0.175049	-5.08414	3.69303e-07	1.29547e-06	KDB19082.1	putative regulator of deoxyribodipyrimidine photo-lyase PHR1
UV8b_485	638.472	-2.12921	0.110524	-11.2691	1.86448e-29	3.06925e-28	KDB19094.1	acetyl-hydrolase
UV8b_488	5819.5	-1.50955	0.264525	-3.33817	0.000843333	0.00184933	KDB19097.1	glucose repressible protein Grg1
UV8b_509	106.077	-1.85735	0.251237	-4.32453	1.5286e-05	4.3824e-05	KDB19118.1	putative heat shock transcription factor Hsf1
UV8b_514	46.3799	-1.71361	0.317975	-3.15245	0.00161909	0.0033865	KDB19123.1	hypothetical protein UV8b_514
UV8b_516	95.7276	-1.71312	0.278199	-3.60214	0.000315603	0.000738875	KDB19125.1	hypothetical protein UV8b_516
UV8b_519	260.959	-2.13886	0.241317	-5.18468	2.1639e-07	7.8355e-07	KDB19128.1	putative C2H2 finger domain protein
UV8b_533	75.8054	-1.28589	0.285622	-2.63354	0.00845011	0.0154415	KDB19142.1	tRNA splicing endonuclease
UV8b_541	279.384	-1.72304	0.222727	-4.52532	6.03037e-06	1.8374e-05	KDB19150.1	tetraspanin Tsp3
UV8b_543	35.2857	-2.13208	0.416141	-2.99702	0.0027263	0.00547415	KDB19152.1	hypothetical protein UV8b_543
UV8b_555	184084	-1.32012	0.114355	-6.75283	1.44987e-11	8.1152e-11	KDB18313.1	heat shock protein 70
UV8b_556	205.868	-1.94564	0.220316	-5.16589	2.39294e-07	8.62385e-07	KDB18314.1	MFS multidrug transporter
UV8b_557	499.81	-1.086	0.150079	-4.23291	2.30686e-05	6.41313e-05	KDB18315.1	ARS-binding protein
UV8b_558	179.626	-2.58735	0.175612	-8.61846	6.78608e-18	6.08786e-17	KDB18316.1	putative deacetylase complex subunit Sds3
UV8b_564	140.875	-1.0186	0.212799	-2.80003	0.00510976	0.00974833	KDB18322.1	hypothetical protein UV8b_564
UV8b_569	159.728	-1.81596	0.271516	-3.91236	9.13978e-05	0.000233675	KDB18327.1	putative meiotic recombination protein Ski8/Rec14
UV8b_579	310.383	-1.59277	0.148883	-6.25801	3.89925e-10	1.89952e-09	KDB18337.1	extracellular serine-rich protein
UV8b_583	522.759	-1.07335	0.141608	-4.43387	9.25566e-06	2.74368e-05	KDB18341.1	putative acetyltransferase, GNAT family
UV8b_585	458.285	-4.36917	0.144153	-17.7298	2.46898e-70	1.6957e-68	KDB18343.1	ankyrin repeat-containing protein
UV8b_586	482.612	-4.00595	0.150725	-15.547	1.66633e-54	7.80012e-53	KDB18344.1	ribonuclease h
UV8b_587	583.499	-1.55723	0.11286	-8.07125	6.95845e-16	5.38364e-15	KDB18345.1	dynamin family protein
UV8b_588	57.5675	-1.57339	0.286124	-3.21671	0.00129671	0.00274789	KDB18346.1	hypothetical protein UV8b_588
UV8b_590	432.406	-1.61166	0.140843	-6.69367	2.17639e-11	1.19658e-10	KDB18348.1	hypothetical protein UV8b_590
UV8b_593	1591.93	-1.43036	0.152891	-5.47257	4.43553e-08	1.75474e-07	KDB18351.1	ATP-binding cassette protein
UV8b_602	480.676	-2.43145	0.122484	-11.6122	3.57459e-31	6.37265e-30	KDB18360.1	sterol delta 5,6-desaturase ERG3
UV8b_607	158.346	-1.02269	0.253089	-2.36373	0.0180918	0.0307863	KDB18365.1	hypothetical protein UV8b_607
UV8b_614	1405.23	-1.91619	0.12657	-8.85599	8.29458e-19	7.85314e-18	KDB18372.1	hypothetical protein UV8b_614
UV8b_615	216.504	-2.35057	0.167472	-8.21032	2.20605e-16	1.79636e-15	KDB18373.1	hypothetical protein UV8b_615
UV8b_627	349.323	-1.89967	0.192601	-5.76962	7.94481e-09	3.41558e-08	KDB18385.1	hypothetical protein UV8b_627
UV8b_635	350.874	-3.15394	0.183629	-10.0471	9.46416e-24	1.20517e-22	KDB18393.1	hypothetical protein UV8b_635
UV8b_636	182.539	-2.93915	0.227317	-7.56342	3.92614e-14	2.65514e-13	KDB18394.1	hypothetical protein UV8b_636
UV8b_637	7134.36	-2.87898	0.143456	-11.7395	7.99651e-32	1.47259e-30	KDB18395.1	perilipin-like protein
UV8b_648	2655.42	-1.33754	0.137539	-5.68862	1.28068e-08	5.37077e-08	KDB18406.1	inositolphosphorylceramide-B C-26 hydroxylase
UV8b_649	143.499	-3.20584	0.338096	-5.54663	2.91228e-08	1.1777e-07	KDB18407.1	hypothetical protein UV8b_649
UV8b_658	49.6159	-1.00124	0.294788	-1.98682	0.0469428	0.0728261	KDB18416.1	hypothetical protein UV8b_658
UV8b_672	3142.13	-1.15348	0.171973	-3.92354	8.72574e-05	0.000223792	KDB18430.1	hypothetical protein UV8b_672
UV8b_678	153.572	-1.26156	0.211522	-3.48883	0.000485132	0.0011061	KDB18436.1	hypothetical protein UV8b_678
UV8b_679	472.594	-1.4774	0.155579	-5.55489	2.77782e-08	1.12604e-07	KDB18437.1	Acyl CoA binding family protein
UV8b_680	743.714	-1.15241	0.13973	-4.82442	1.40412e-06	4.59934e-06	KDB18438.1	hypothetical protein UV8b_680
UV8b_685	742.557	-1.6955	0.244734	-4.05259	5.06541e-05	0.000134059	KDB18443.1	putative cytokinesis inhibitor byr4
UV8b_695	569.384	-1.14956	0.110038	-6.11107	9.89645e-10	4.6222e-09	KDB18453.1	hypothetical protein UV8b_695
UV8b_696	297.403	-1.14488	0.157711	-4.24647	2.17163e-05	6.06335e-05	KDB18454.1	hypothetical protein UV8b_696
UV8b_704	835.868	-1.03201	0.146706	-4.11495	3.87267e-05	0.000104405	KDB18462.1	hypothetical protein UV8b_704
UV8b_713	1577.46	-1.1667	0.207293	-3.29233	0.000993619	0.00215186	KDB18471.1	hypothetical protein UV8b_713
UV8b_717	1393.88	-1.09532	0.140731	-4.55281	5.2934e-06	1.62111e-05	KDB18475.1	putative ubiquitin-protein ligase (Hul4)
UV8b_720	406.087	-1.48203	0.21503	-4.03166	5.53837e-05	0.000145793	KDB18478.1	Type 1 phosphatases regulator ypi1
UV8b_724	628.794	-1.95817	0.188898	-6.06389	1.32868e-09	6.13725e-09	KDB18482.1	hypothetical protein UV8b_724
UV8b_732	111.742	-1.43191	0.232354	-3.60489	0.000312283	0.000732127	KDB18490.1	DUF726 domain-containing protein
UV8b_743	747.218	-1.25974	0.276744	-2.66275	0.00775055	0.0142667	KDB18501.1	hypothetical protein UV8b_743
UV8b_744	2291.11	-1.51217	0.156105	-5.66644	1.45796e-08	6.08379e-08	KDB18502.1	ADAM protease ADM-B
UV8b_760	3209.04	-1.64887	0.13411	-7.19205	6.38254e-13	4.00594e-12	KDB18518.1	putative RING finger domain protein
UV8b_761	2151.32	-1.03509	0.113439	-5.33756	9.42071e-08	3.57339e-07	KDB18519.1	glutamine-dependent nad(+) synthetase
UV8b_762	3720.03	-1.9552	0.141605	-8.0768	6.64862e-16	5.15822e-15	KDB18520.1	glycoside hydrolase
UV8b_763	101.271	-3.26635	0.266025	-7.18239	6.85019e-13	4.28982e-12	KDB18521.1	hypothetical protein UV8b_763
UV8b_776	3996.62	-2.38962	0.095604	-14.6211	2.05969e-48	7.28193e-47	KDB18534.1	glycoside hydrolase family 63
UV8b_795	459.326	-1.53918	0.145663	-6.18114	6.36402e-10	3.03323e-09	KDB18553.1	WSC domain containing protein
UV8b_798	46.879	-1.75543	0.345008	-2.97634	0.00291712	0.00581827	KDB18556.1	hypothetical protein UV8b_798
UV8b_803	543.69	-1.03481	0.140814	-4.29879	1.71734e-05	4.88446e-05	KDB18561.1	DUF833 domain-containing protein
UV8b_804	74.9296	-3.18281	0.317427	-5.86536	4.48167e-09	1.97019e-08	KDB18562.1	hypothetical protein UV8b_804
UV8b_805	52.1122	-3.79523	0.334413	-6.63869	3.16488e-11	1.70867e-10	KDB18563.1	hypothetical protein UV8b_805
UV8b_806	481.436	-1.63536	0.166937	-5.73046	1.00157e-08	4.26432e-08	KDB18564.1	putative TFIIH and nucleotide excision repair factor 3 complexes subunit (Tfb2)
UV8b_807	455.892	-2.79932	0.188741	-8.6759	4.10306e-18	3.72476e-17	KDB18565.1	hypothetical protein UV8b_807
UV8b_808	419.796	-4.65137	0.189289	-14.3742	7.51519e-47	2.47912e-45	KDB18566.1	putative TFIIH and nucleotide excision repair factor 3 complexes subunit (Tfb2)
UV8b_810	1273.73	-1.04101	0.150167	-4.05516	5.01007e-05	0.00013293	KDB18568.1	hypothetical protein UV8b_810
UV8b_813	1932.89	-3.03948	0.108988	-16.3135	7.90846e-60	4.2207e-58	KDB18571.1	U-box domain-containing protein
UV8b_824	502.053	-1.25579	0.247933	-2.96285	0.00304803	0.00605488	KDB18582.1	hypothetical protein UV8b_824
UV8b_825	804.518	-1.35812	0.224988	-3.53107	0.000413886	0.000954306	KDB18583.1	hypothetical protein UV8b_825
UV8b_827	767.874	-2.23231	0.183753	-7.10637	1.19136e-12	7.31309e-12	KDB18585.1	oligopeptide transporter
UV8b_828	116.702	-2.18313	0.230173	-5.54822	2.88597e-08	1.16819e-07	KDB18586.1	hypothetical protein UV8b_828
UV8b_833	762.692	-4.52287	0.195174	-13.5556	7.33711e-42	2.03568e-40	KDB18591.1	hypothetical protein UV8b_833
UV8b_838	1168.89	-1.07056	0.250285	-2.5021	0.012346	0.0218196	KDB18596.1	cytosolic Fe-S cluster assembling factor NBP35
[truncated: 1,712 more rows]
